# Supplementary material for: CompleteBin: A transformer-based framework unlocks microbial dark matter through improved short contig binning
Source: Research Square preprint supplement (doi:10.21203/rs.3.rs-7962084/v1), 2025-10-31
Supplement: Supplementary file 1 [file affb4e700e7f1c3668c4e612.xlsx]

## Sheet: Sheet1
MAGs	Cluster	Domain	Phylum	Class	Order	Family	Genus	Species
ComeBin_CS12_bin.176356	1_1	d__Bacteria	p__Desulfobacterota	c__GWC2-55-46	o__GWC2-55-46	f__JAJCZF01	g__	s__
CompleteBin_CS12.446	1_1	d__Bacteria	p__Desulfobacterota	c__GWC2-55-46	o__GWC2-55-46	f__JAJCZF01	g__	s__
ComeBin_CS12_bin.35434	10_1	d__Bacteria	p__Chloroflexota	c__Anaerolineae	o__Anaerolineales	f__UBA4823	g__	s__
CompleteBin_CS12.63	10_1	d__Bacteria	p__Chloroflexota	c__Anaerolineae	o__Anaerolineales	f__UBA4823	g__	s__
CONCOCT_CS01_bin.110	100_1	d__Bacteria	p__Planctomycetota	c__Brocadiia	o__Brocadiales	f__Scalinduaceae	g__Scalindua_A	s__
ComeBin_CS01_bin.191862	100_1	d__Bacteria	p__Planctomycetota	c__Brocadiia	o__Brocadiales	f__Scalinduaceae	g__Scalindua_A	s__
CompleteBin_CS01.688	100_1	d__Bacteria	p__Planctomycetota	c__Brocadiia	o__Brocadiales	f__Scalinduaceae	g__Scalindua_A	s__
CONCOCT_CS05_bin.177	100_2	d__Bacteria	p__Planctomycetota	c__Brocadiia	o__Brocadiales	f__Scalinduaceae	g__Scalindua_A	s__
ComeBin_CS05_bin.29881	100_2	d__Bacteria	p__Planctomycetota	c__Brocadiia	o__Brocadiales	f__Scalinduaceae	g__Scalindua_A	s__
CompleteBin_CS05.115	100_2	d__Bacteria	p__Planctomycetota	c__Brocadiia	o__Brocadiales	f__Scalinduaceae	g__Scalindua_A	s__
MetaBAT2_CS05_bin.32	100_2	d__Bacteria	p__Planctomycetota	c__Brocadiia	o__Brocadiales	f__Scalinduaceae	g__Scalindua_A	s__
SemiBin2_CS05_SemiBin.62	100_2	d__Bacteria	p__Planctomycetota	c__Brocadiia	o__Brocadiales	f__Scalinduaceae	g__Scalindua_A	s__
VAMB_CS05_bin.61684	100_2	d__Bacteria	p__Planctomycetota	c__Brocadiia	o__Brocadiales	f__Scalinduaceae	g__Scalindua_A	s__
ComeBin_CS05_bin.164252	101_1	d__Bacteria	p__Planctomycetota	c__Brocadiia	o__Brocadiales	f__Scalinduaceae	g__Scalindua	s__
CompleteBin_CS05.338	101_1	d__Bacteria	p__Planctomycetota	c__Brocadiia	o__Brocadiales	f__Scalinduaceae	g__Scalindua	s__
CONCOCT_CS08_bin.257	101_2	d__Bacteria	p__Planctomycetota	c__Brocadiia	o__Brocadiales	f__Scalinduaceae	g__Scalindua	s__
ComeBin_CS08_bin.78352	101_2	d__Bacteria	p__Planctomycetota	c__Brocadiia	o__Brocadiales	f__Scalinduaceae	g__Scalindua	s__
CompleteBin_CS08.136	101_2	d__Bacteria	p__Planctomycetota	c__Brocadiia	o__Brocadiales	f__Scalinduaceae	g__Scalindua	s__
ComeBin_CS10_bin.84918	101_3	d__Bacteria	p__Planctomycetota	c__Brocadiia	o__Brocadiales	f__Scalinduaceae	g__Scalindua	s__
CompleteBin_CS10.682	101_3	d__Bacteria	p__Planctomycetota	c__Brocadiia	o__Brocadiales	f__Scalinduaceae	g__Scalindua	s__
CompleteBin_CS10.683	101_3	d__Bacteria	p__Planctomycetota	c__Brocadiia	o__Brocadiales	f__Scalinduaceae	g__Scalindua	s__
ComeBin_CS08_bin.6094	102_1	d__Bacteria	p__Planctomycetota	c__B15-G4	o__B15-G4	f__	g__	s__
CompleteBin_CS08.146	102_1	d__Bacteria	p__Planctomycetota	c__B15-G4	o__B15-G4	f__	g__	s__
CompleteBin_CS08.163	102_1	d__Bacteria	p__Planctomycetota	c__B15-G4	o__B15-G4	f__	g__	s__
SemiBin2_CS08_SemiBin.23	102_1	d__Bacteria	p__Planctomycetota	c__B15-G4	o__B15-G4	f__	g__	s__
ComeBin_CS03_bin.577	103_1	d__Bacteria	p__Zixibacteria	c__MSB-5A5	o__GN15	f__FEB-12	g__JAUXCD01	s__JAUXCD01 sp030619085
CompleteBin_CS03.26	103_1	d__Bacteria	p__Zixibacteria	c__MSB-5A5	o__GN15	f__FEB-12	g__JAUXCD01	s__JAUXCD01 sp030619085
CompleteBin_CS03.576	103_1	d__Bacteria	p__Zixibacteria	c__MSB-5A5	o__GN15	f__FEB-12	g__JAUXCD01	s__JAUXCD01 sp030619085
MetaBAT2_CS03_bin.45	103_1	d__Bacteria	p__Zixibacteria	c__MSB-5A5	o__GN15	f__FEB-12	g__JAUXCD01	s__JAUXCD01 sp030619085
SemiBin2_CS03_SemiBin.6	103_1	d__Bacteria	p__Zixibacteria	c__MSB-5A5	o__GN15	f__FEB-12	g__JAUXCD01	s__JAUXCD01 sp030619085
ComeBin_CS10_bin.159565	104_1	d__Bacteria	p__Bacteroidota	c__Bacteroidia	o__Flavobacteriales	f__JAHECK01	g__	s__
CompleteBin_CS10.836	104_1	d__Bacteria	p__Bacteroidota	c__Bacteroidia	o__Flavobacteriales	f__JAHECK01	g__	s__
CompleteBin_CS05.359	105_1	d__Bacteria	p__Planctomycetota	c__Phycisphaerae	o__Sedimentisphaerales	f__SG8-4	g__SG8-4	s__
CompleteBin_CS05.370	105_1	d__Bacteria	p__Planctomycetota	c__Phycisphaerae	o__Sedimentisphaerales	f__SG8-4	g__SG8-4	s__
ComeBin_CS03_bin.14403	106_0	Unclassified	0	0	0	0	0	0
ComeBin_CS03_bin.83258	107_1	d__Bacteria	p__Planctomycetota	c__Phycisphaerae	o__Sedimentisphaerales	f__SG8-4	g__CS2-K091	s__
CompleteBin_CS03.226	107_1	d__Bacteria	p__Planctomycetota	c__Phycisphaerae	o__Sedimentisphaerales	f__SG8-4	g__CS2-K091	s__
ComeBin_CS05_bin.125006	107_2	d__Bacteria	p__Planctomycetota	c__Phycisphaerae	o__Sedimentisphaerales	f__SG8-4	g__CS2-K091	s__
CompleteBin_CS05.342	107_2	d__Bacteria	p__Planctomycetota	c__Phycisphaerae	o__Sedimentisphaerales	f__SG8-4	g__CS2-K091	s__
ComeBin_CS12_bin.98244	107_3	d__Bacteria	p__Planctomycetota	c__Phycisphaerae	o__Sedimentisphaerales	f__SG8-4	g__CS2-K091	s__
CompleteBin_CS12.218	107_3	d__Bacteria	p__Planctomycetota	c__Phycisphaerae	o__Sedimentisphaerales	f__SG8-4	g__CS2-K091	s__
CONCOCT_CS01_bin.228	108_1	d__Bacteria	p__Planctomycetota	c__Phycisphaerae	o__Sedimentisphaerales	f__SG8-4	g__NIOZ-UU13	s__
ComeBin_CS01_bin.193676	108_1	d__Bacteria	p__Planctomycetota	c__Phycisphaerae	o__Sedimentisphaerales	f__SG8-4	g__NIOZ-UU13	s__
CompleteBin_CS01.692	108_1	d__Bacteria	p__Planctomycetota	c__Phycisphaerae	o__Sedimentisphaerales	f__SG8-4	g__NIOZ-UU13	s__
CompleteBin_CS01.693	108_1	d__Bacteria	p__Planctomycetota	c__Phycisphaerae	o__Sedimentisphaerales	f__SG8-4	g__NIOZ-UU13	s__
CONCOCT_CS05_bin.54	109_1	d__Bacteria	p__Planctomycetota	c__Phycisphaerae	o__Sedimentisphaerales	f__SG8-4	g__NIOZ-UU13	s__
ComeBin_CS05_bin.137010	109_1	d__Bacteria	p__Planctomycetota	c__Phycisphaerae	o__Sedimentisphaerales	f__SG8-4	g__NIOZ-UU13	s__
CompleteBin_CS05.269	109_1	d__Bacteria	p__Planctomycetota	c__Phycisphaerae	o__Sedimentisphaerales	f__SG8-4	g__NIOZ-UU13	s__
CompleteBin_CS05.371	109_1	d__Bacteria	p__Planctomycetota	c__Phycisphaerae	o__Sedimentisphaerales	f__SG8-4	g__NIOZ-UU13	s__
CompleteBin_CS08.394	109_2	d__Bacteria	p__Planctomycetota	c__Phycisphaerae	o__Sedimentisphaerales	f__SG8-4	g__NIOZ-UU13	s__
ComeBin_CS08_bin.68979	11_1	d__Bacteria	p__Chloroflexota	c__Anaerolineae	o__Anaerolineales	f__UBA4823	g__JAUWPO01	s__
CompleteBin_CS08.120	11_1	d__Bacteria	p__Chloroflexota	c__Anaerolineae	o__Anaerolineales	f__UBA4823	g__JAUWPO01	s__
SemiBin2_CS08_SemiBin.131	11_1	d__Bacteria	p__Chloroflexota	c__Anaerolineae	o__Anaerolineales	f__UBA4823	g__JAUWPO01	s__
CONCOCT_CS01_bin.43	11_2	d__Bacteria	p__Chloroflexota	c__Anaerolineae	o__Anaerolineales	f__UBA4823	g__JAUWPO01	s__
ComeBin_CS01_bin.90887	11_2	d__Bacteria	p__Chloroflexota	c__Anaerolineae	o__Anaerolineales	f__UBA4823	g__JAUWPO01	s__
CompleteBin_CS01.438	11_2	d__Bacteria	p__Chloroflexota	c__Anaerolineae	o__Anaerolineales	f__UBA4823	g__JAUWPO01	s__
SemiBin2_CS01_SemiBin.259	11_2	d__Bacteria	p__Chloroflexota	c__Anaerolineae	o__Anaerolineales	f__UBA4823	g__JAUWPO01	s__
ComeBin_CS05_bin.31181	11_3	d__Bacteria	p__Chloroflexota	c__Anaerolineae	o__Anaerolineales	f__UBA4823	g__JAUWPO01	s__JAUWPO01 sp030611505
CompleteBin_CS05.118	11_3	d__Bacteria	p__Chloroflexota	c__Anaerolineae	o__Anaerolineales	f__UBA4823	g__JAUWPO01	s__JAUWPO01 sp030611505
SemiBin2_CS05_SemiBin.64	11_3	d__Bacteria	p__Chloroflexota	c__Anaerolineae	o__Anaerolineales	f__UBA4823	g__JAUWPO01	s__JAUWPO01 sp030611505
CONCOCT_CS03_bin.65	11_4	d__Bacteria	p__Chloroflexota	c__Anaerolineae	o__Anaerolineales	f__UBA4823	g__JAUWPO01	s__
ComeBin_CS03_bin.17608	11_4	d__Bacteria	p__Chloroflexota	c__Anaerolineae	o__Anaerolineales	f__UBA4823	g__JAUWPO01	s__
CompleteBin_CS03.569	11_4	d__Bacteria	p__Chloroflexota	c__Anaerolineae	o__Anaerolineales	f__UBA4823	g__JAUWPO01	s__
CompleteBin_CS03.708	11_4	d__Bacteria	p__Chloroflexota	c__Anaerolineae	o__Anaerolineales	f__UBA4823	g__JAUWPO01	s__
SemiBin2_CS03_SemiBin.80	11_4	d__Bacteria	p__Chloroflexota	c__Anaerolineae	o__Anaerolineales	f__UBA4823	g__JAUWPO01	s__
CONCOCT_CS12_bin.259	11_5	d__Bacteria	p__Chloroflexota	c__Anaerolineae	o__Anaerolineales	f__UBA4823	g__JAUWPO01	s__
ComeBin_CS12_bin.64511	11_5	d__Bacteria	p__Chloroflexota	c__Anaerolineae	o__Anaerolineales	f__UBA4823	g__JAUWPO01	s__
CompleteBin_CS12.133	11_5	d__Bacteria	p__Chloroflexota	c__Anaerolineae	o__Anaerolineales	f__UBA4823	g__JAUWPO01	s__
SemiBin2_CS12_SemiBin.196	11_5	d__Bacteria	p__Chloroflexota	c__Anaerolineae	o__Anaerolineales	f__UBA4823	g__JAUWPO01	s__
ComeBin_CS03_bin.44200	110_1	d__Bacteria	p__Planctomycetota	c__Phycisphaerae	o__Sedimentisphaerales	f__SG8-4	g__NIOZ-UU13	s__
CompleteBin_CS03.94	110_1	d__Bacteria	p__Planctomycetota	c__Phycisphaerae	o__Sedimentisphaerales	f__SG8-4	g__NIOZ-UU13	s__
MetaBAT2_CS03_bin.112	110_1	d__Bacteria	p__Planctomycetota	c__Phycisphaerae	o__Sedimentisphaerales	f__SG8-4	g__NIOZ-UU13	s__
CompleteBin_CS12.455	111_0	d__Bacteria	p__Planctomycetota	c__Phycisphaerae	o__Sedimentisphaerales	f__SG8-4	g__NIOZ-UU13	s__
ComeBin_CS03_bin.172224	112_0	d__Bacteria	p__Planctomycetota	c__Phycisphaerae	o__Sedimentisphaerales	f__SG8-4	g__CAJVYK01	s__
CONCOCT_CS01_bin.92	113_1	d__Bacteria	p__Spirochaetota	c__Spirochaetia	o__DSM-27196	f__SLST01	g__JAHOYX01	s__
ComeBin_CS01_bin.154436	113_1	d__Bacteria	p__Spirochaetota	c__Spirochaetia	o__DSM-27196	f__SLST01	g__JAHOYX01	s__
CompleteBin_CS01.598	113_1	d__Bacteria	p__Spirochaetota	c__Spirochaetia	o__DSM-27196	f__SLST01	g__JAHOYX01	s__
CONCOCT_CS12_bin.71	114_1	d__Bacteria	p__Planctomycetota	c__Phycisphaerae	o__Sedimentisphaerales	f__SM23-30	g__DAOVXR01	s__
ComeBin_CS12_bin.53192	114_1	d__Bacteria	p__Planctomycetota	c__Phycisphaerae	o__Sedimentisphaerales	f__SM23-30	g__DAOVXR01	s__
CompleteBin_CS12.106	114_1	d__Bacteria	p__Planctomycetota	c__Phycisphaerae	o__Sedimentisphaerales	f__SM23-30	g__DAOVXR01	s__
SemiBin2_CS12_SemiBin.171	114_1	d__Bacteria	p__Planctomycetota	c__Phycisphaerae	o__Sedimentisphaerales	f__SM23-30	g__DAOVXR01	s__
VAMB_CS12_bin.20162	114_1	d__Bacteria	p__Planctomycetota	c__Phycisphaerae	o__Sedimentisphaerales	f__SM23-30	g__DAOVXR01	s__
CompleteBin_CS01.208	114_2	d__Bacteria	p__Planctomycetota	c__Phycisphaerae	o__Sedimentisphaerales	f__SM23-30	g__DAOVXR01	s__
CompleteBin_CS01.267	114_2	d__Bacteria	p__Planctomycetota	c__Phycisphaerae	o__Sedimentisphaerales	f__SM23-30	g__DAOVXR01	s__
CONCOCT_CS01_bin.75	114_3	d__Bacteria	p__Planctomycetota	c__Phycisphaerae	o__Sedimentisphaerales	f__SM23-30	g__DAOVXR01	s__
ComeBin_CS05_bin.114020	115_1	d__Bacteria	p__Pseudomonadota	c__Alphaproteobacteria	o__Rhodobacterales	f__Rhodobacteraceae	g__UBA3077	s__
CompleteBin_CS05.588	115_1	d__Bacteria	p__Pseudomonadota	c__Alphaproteobacteria	o__Rhodobacterales	f__Rhodobacteraceae	g__UBA3077	s__
CompleteBin_CS05.610	115_1	d__Bacteria	p__Pseudomonadota	c__Alphaproteobacteria	o__Rhodobacterales	f__Rhodobacteraceae	g__UBA3077	s__
ComeBin_CS05_bin.10468	116_1	d__Bacteria	p__Pseudomonadota	c__Alphaproteobacteria	o__Rhodobacterales	f__Rhodobacteraceae	g__UBA3077	s__
CompleteBin_CS05.577	116_1	d__Bacteria	p__Pseudomonadota	c__Alphaproteobacteria	o__Rhodobacterales	f__Rhodobacteraceae	g__UBA3077	s__
CompleteBin_CS05.599	116_1	d__Bacteria	p__Pseudomonadota	c__Alphaproteobacteria	o__Rhodobacterales	f__Rhodobacteraceae	g__UBA3077	s__
SemiBin2_CS05_SemiBin.27	116_1	d__Bacteria	p__Pseudomonadota	c__Alphaproteobacteria	o__Rhodobacterales	f__Rhodobacteraceae	g__UBA3077	s__
CONCOCT_CS12_bin.138	117_1	d__Bacteria	p__Chloroflexota	c__Dehalococcoidia	o__Dehalococcoidales	f__JAUXAE01	g__	s__
ComeBin_CS12_bin.150606	117_1	d__Bacteria	p__Chloroflexota	c__Dehalococcoidia	o__Dehalococcoidales	f__JAUXAE01	g__	s__
CompleteBin_CS12.371	117_1	d__Bacteria	p__Chloroflexota	c__Dehalococcoidia	o__Dehalococcoidales	f__JAUXAE01	g__	s__
MetaBAT2_CS12_bin.169	117_1	d__Bacteria	p__Chloroflexota	c__Dehalococcoidia	o__Dehalococcoidales	f__JAUXAE01	g__	s__
ComeBin_CS05_bin.80721	118_1	d__Bacteria	p__Pseudomonadota	c__Alphaproteobacteria	o__Kiloniellales	f__JAKSDN01	g__CALJXB01	s__
CompleteBin_CS05.170	118_1	d__Bacteria	p__Pseudomonadota	c__Alphaproteobacteria	o__Kiloniellales	f__JAKSDN01	g__CALJXB01	s__
MetaBAT2_CS05_bin.35	118_1	d__Bacteria	p__Pseudomonadota	c__Alphaproteobacteria	o__Kiloniellales	f__JAKSDN01	g__CALJXB01	s__
ComeBin_CS10_bin.160719	119_1	d__Bacteria	p__Verrucomicrobiota	c__Lentisphaeria	o__Victivallales	f__Victivallaceae	g__JAHOYW01	s__
CompleteBin_CS10.838	119_1	d__Bacteria	p__Verrucomicrobiota	c__Lentisphaeria	o__Victivallales	f__Victivallaceae	g__JAHOYW01	s__
CompleteBin_CS01.198	12_1	d__Bacteria	p__Chloroflexota	c__Anaerolineae	o__B4-G1	f__SLSP01	g__PWVB01	s__
CompleteBin_CS01.875	12_1	d__Bacteria	p__Chloroflexota	c__Anaerolineae	o__B4-G1	f__SLSP01	g__PWVB01	s__
ComeBin_CS12_bin.114743	120_1	d__Bacteria	p__Planctomycetota	c__Phycisphaerae	o__Sedimentisphaerales	f__Anaerohalosphaeraceae	g__4572-13	s__
CompleteBin_CS12.266	120_1	d__Bacteria	p__Planctomycetota	c__Phycisphaerae	o__Sedimentisphaerales	f__Anaerohalosphaeraceae	g__4572-13	s__
CompleteBin_CS10.538	120_2	d__Bacteria	p__Planctomycetota	c__Phycisphaerae	o__Sedimentisphaerales	f__Anaerohalosphaeraceae	g__4572-13	s__
MetaBAT2_CS10_bin.76	120_2	d__Bacteria	p__Planctomycetota	c__Phycisphaerae	o__Sedimentisphaerales	f__Anaerohalosphaeraceae	g__4572-13	s__
CONCOCT_CS03_bin.198	121_1	d__Bacteria	p__Planctomycetota	c__Phycisphaerae	o__Sedimentisphaerales	f__Anaerohalosphaeraceae	g__4572-13	s__
CompleteBin_CS03.342	121_1	d__Bacteria	p__Planctomycetota	c__Phycisphaerae	o__Sedimentisphaerales	f__Anaerohalosphaeraceae	g__4572-13	s__
CONCOCT_CS05_bin.83	121_2	d__Bacteria	p__Planctomycetota	c__Phycisphaerae	o__Sedimentisphaerales	f__Anaerohalosphaeraceae	g__4572-13	s__
ComeBin_CS05_bin.56269	121_2	d__Bacteria	p__Planctomycetota	c__Phycisphaerae	o__Sedimentisphaerales	f__Anaerohalosphaeraceae	g__4572-13	s__
CompleteBin_CS05.181	121_2	d__Bacteria	p__Planctomycetota	c__Phycisphaerae	o__Sedimentisphaerales	f__Anaerohalosphaeraceae	g__4572-13	s__
CONCOCT_CS03_bin.86	122_1	d__Bacteria	p__Planctomycetota	c__Phycisphaerae	o__Sedimentisphaerales	f__Anaerohalosphaeraceae	g__	s__
ComeBin_CS03_bin.101105	122_1	d__Bacteria	p__Planctomycetota	c__Phycisphaerae	o__Sedimentisphaerales	f__Anaerohalosphaeraceae	g__	s__
CompleteBin_CS03.234	122_1	d__Bacteria	p__Planctomycetota	c__Phycisphaerae	o__Sedimentisphaerales	f__Anaerohalosphaeraceae	g__	s__
CompleteBin_CS03.262	122_1	d__Bacteria	p__Planctomycetota	c__Phycisphaerae	o__Sedimentisphaerales	f__Anaerohalosphaeraceae	g__	s__
CompleteBin_CS03.271	122_1	d__Bacteria	p__Planctomycetota	c__Phycisphaerae	o__Sedimentisphaerales	f__Anaerohalosphaeraceae	g__	s__
CompleteBin_CS01.116	123_1	d__Bacteria	p__Electryoneota	c__RPQS01	o__RPQS01	f__DYHQ01	g__JAUXGA01	s__
CompleteBin_CS01.213	123_1	d__Bacteria	p__Electryoneota	c__RPQS01	o__RPQS01	f__DYHQ01	g__JAUXGA01	s__
CompleteBin_CS01.791	123_1	d__Bacteria	p__Electryoneota	c__RPQS01	o__RPQS01	f__DYHQ01	g__JAUXGA01	s__
CONCOCT_CS01_bin.163	124_1	d__Bacteria	p__Planctomycetota	c__E44-bin39	o__E44-bin39	f__E44-bin39	g__	s__
ComeBin_CS01_bin.162631	124_1	d__Bacteria	p__Planctomycetota	c__E44-bin39	o__E44-bin39	f__E44-bin39	g__	s__
CompleteBin_CS01.151	124_1	d__Bacteria	p__Planctomycetota	c__E44-bin39	o__E44-bin39	f__E44-bin39	g__	s__
CompleteBin_CS01.623	124_1	d__Bacteria	p__Planctomycetota	c__E44-bin39	o__E44-bin39	f__E44-bin39	g__	s__
CompleteBin_CS01.167	125_1	d__Bacteria	p__Planctomycetota	c__Phycisphaerae	o__SM23-33	f__SM23-33	g__	s__
CompleteBin_CS01.622	125_1	d__Bacteria	p__Planctomycetota	c__Phycisphaerae	o__SM23-33	f__SM23-33	g__	s__
CONCOCT_CS01_bin.148	126_1	d__Bacteria	p__Planctomycetota	c__Phycisphaerae	o__SM23-33	f__SM23-33	g__JAUWNJ01	s__
ComeBin_CS01_bin.160090	126_1	d__Bacteria	p__Planctomycetota	c__Phycisphaerae	o__SM23-33	f__SM23-33	g__JAUWNJ01	s__
CompleteBin_CS01.515	126_1	d__Bacteria	p__Planctomycetota	c__Phycisphaerae	o__SM23-33	f__SM23-33	g__JAUWNJ01	s__
ComeBin_CS01_bin.57948	127_1	d__Bacteria	p__Actinomycetota	c__Acidimicrobiia	o__UBA5794	f__UBA5794	g__JAHEEL01	s__JAHEEL01 sp030618675
CompleteBin_CS01.331	127_1	d__Bacteria	p__Actinomycetota	c__Acidimicrobiia	o__UBA5794	f__UBA5794	g__JAHEEL01	s__JAHEEL01 sp030618675
MetaBAT2_CS01_bin.132	127_1	d__Bacteria	p__Actinomycetota	c__Acidimicrobiia	o__UBA5794	f__UBA5794	g__JAHEEL01	s__JAHEEL01 sp030618675
VAMB_CS01_bin.16616	127_1	d__Bacteria	p__Actinomycetota	c__Acidimicrobiia	o__UBA5794	f__UBA5794	g__JAHEEL01	s__JAHEEL01 sp030618675
ComeBin_CS08_bin.125783	128_1	d__Bacteria	p__Actinomycetota	c__Acidimicrobiia	o__UBA5794	f__UBA5794	g__JAHEEL01	s__
CompleteBin_CS08.129	128_1	d__Bacteria	p__Actinomycetota	c__Acidimicrobiia	o__UBA5794	f__UBA5794	g__JAHEEL01	s__
ComeBin_CS10_bin.70987	128_2	d__Bacteria	p__Actinomycetota	c__Acidimicrobiia	o__UBA5794	f__UBA5794	g__JAHEEL01	s__
CompleteBin_CS10.630	128_2	d__Bacteria	p__Actinomycetota	c__Acidimicrobiia	o__UBA5794	f__UBA5794	g__JAHEEL01	s__
MetaBAT2_CS10_bin.54	128_2	d__Bacteria	p__Actinomycetota	c__Acidimicrobiia	o__UBA5794	f__UBA5794	g__JAHEEL01	s__
CompleteBin_CS01.329	128_3	d__Bacteria	p__Actinomycetota	c__Acidimicrobiia	o__UBA5794	f__UBA5794	g__JAHEEL01	s__
SemiBin2_CS08_SemiBin.137	129_0	d__Bacteria	p__Actinomycetota	c__Acidimicrobiia	o__UBA5794	f__UBA5794	g__JAHEEL01	s__
CONCOCT_CS01_bin.279	13_1	d__Bacteria	p__Chloroflexota	c__Anaerolineae	o__UBA1429	f__UBA1429	g__	s__
ComeBin_CS01_bin.198173	13_1	d__Bacteria	p__Chloroflexota	c__Anaerolineae	o__UBA1429	f__UBA1429	g__	s__
CompleteBin_CS01.704	13_1	d__Bacteria	p__Chloroflexota	c__Anaerolineae	o__UBA1429	f__UBA1429	g__	s__
ComeBin_CS08_bin.120364	130_1	d__Bacteria	p__Actinomycetota	c__Acidimicrobiia	o__UBA5794	f__UBA5794	g__B3-G11	s__
CompleteBin_CS08.218	130_1	d__Bacteria	p__Actinomycetota	c__Acidimicrobiia	o__UBA5794	f__UBA5794	g__B3-G11	s__
CompleteBin_CS08.219	130_1	d__Bacteria	p__Actinomycetota	c__Acidimicrobiia	o__UBA5794	f__UBA5794	g__B3-G11	s__
MetaBAT2_CS08_bin.120	130_1	d__Bacteria	p__Actinomycetota	c__Acidimicrobiia	o__UBA5794	f__UBA5794	g__B3-G11	s__
VAMB_CS08_bin.15267	130_1	d__Bacteria	p__Actinomycetota	c__Acidimicrobiia	o__UBA5794	f__UBA5794	g__B3-G11	s__
CompleteBin_CS08.220	131_0	d__Bacteria	p__Actinomycetota	c__Acidimicrobiia	o__UBA5794	f__UBA5794	g__	s__
CompleteBin_CS10.798	132_0	d__Bacteria	p__Actinomycetota	c__Acidimicrobiia	o__UBA5794	f__UBA5794	g__	s__
ComeBin_CS08_bin.79545	133_1	d__Bacteria	p__Actinomycetota	c__Acidimicrobiia	o__UBA5794	f__UBA5794	g__JAMBLL01	s__
ComeBin_CS10_bin.6815	133_2	d__Bacteria	p__Actinomycetota	c__Acidimicrobiia	o__UBA5794	f__UBA5794	g__JAMBLL01	s__
ComeBin_CS08_bin.155461	134_1	d__Bacteria	p__Actinomycetota	c__Acidimicrobiia	o__UBA5794	f__UBA5794	g__JAMBLL01	s__
ComeBin_CS10_bin.133284	134_2	d__Bacteria	p__Actinomycetota	c__Acidimicrobiia	o__UBA5794	f__UBA5794	g__JAMBLL01	s__
CONCOCT_CS10_bin.219	135_0	Unclassified Bacteria
ComeBin_CS08_bin.97246	136_1	d__Bacteria	p__Pseudomonadota	c__Gammaproteobacteria	o__Chromatiales	f__Sedimenticolaceae	g__JAUXGQ01	s__JAUXGQ01 sp030621975
CompleteBin_CS08.179	136_1	d__Bacteria	p__Pseudomonadota	c__Gammaproteobacteria	o__Chromatiales	f__Sedimenticolaceae	g__JAUXGQ01	s__JAUXGQ01 sp030621975
SemiBin2_CS08_SemiBin.163	136_1	d__Bacteria	p__Pseudomonadota	c__Gammaproteobacteria	o__Chromatiales	f__Sedimenticolaceae	g__JAUXGQ01	s__JAUXGQ01 sp030621975
CompleteBin_CS03.582	137_0	d__Bacteria	p__Planctomycetota	c__Phycisphaerae	o__UBA1845	f__UBA1845	g__	s__
ComeBin_CS10_bin.205414	138_1	d__Bacteria	p__Pseudomonadota	c__Gammaproteobacteria	o__Pseudomonadales	f__Nitrincolaceae	g__Marinobacterium	s__Marinobacterium stanieri
CompleteBin_CS10.61	138_1	d__Bacteria	p__Pseudomonadota	c__Gammaproteobacteria	o__Pseudomonadales	f__Nitrincolaceae	g__Marinobacterium	s__Marinobacterium stanieri
CompleteBin_CS10.985	138_1	d__Bacteria	p__Pseudomonadota	c__Gammaproteobacteria	o__Pseudomonadales	f__Nitrincolaceae	g__Marinobacterium	s__Marinobacterium stanieri
ComeBin_CS05_bin.60498	139_1	d__Bacteria	p__Pseudomonadota	c__Gammaproteobacteria	o__Woeseiales	f__Woeseiaceae	g__JAACFE01	s__JAACFE01 sp030641695
CompleteBin_CS05.187	139_1	d__Bacteria	p__Pseudomonadota	c__Gammaproteobacteria	o__Woeseiales	f__Woeseiaceae	g__JAACFE01	s__JAACFE01 sp030641695
MetaBAT2_CS05_bin.123	139_1	d__Bacteria	p__Pseudomonadota	c__Gammaproteobacteria	o__Woeseiales	f__Woeseiaceae	g__JAACFE01	s__JAACFE01 sp030641695
SemiBin2_CS05_SemiBin.118	139_1	d__Bacteria	p__Pseudomonadota	c__Gammaproteobacteria	o__Woeseiales	f__Woeseiaceae	g__JAACFE01	s__JAACFE01 sp030641695
VAMB_CS05_bin.39801	139_1	d__Bacteria	p__Pseudomonadota	c__Gammaproteobacteria	o__Woeseiales	f__Woeseiaceae	g__JAACFE01	s__JAACFE01 sp030641695
CONCOCT_CS03_bin.187	14_0	d__Bacteria	p__Chloroflexota	c__Anaerolineae	o__JAKLPW01	f__JAKLPW01	g__	s__
ComeBin_CS05_bin.58543	140_1	d__Bacteria	p__Pseudomonadota	c__Gammaproteobacteria	o__GCA-2729495	f__GCA-2729495	g__JAPUGB01	s__JAPUGB01 sp030614035
CompleteBin_CS05.121	140_1	d__Bacteria	p__Pseudomonadota	c__Gammaproteobacteria	o__GCA-2729495	f__GCA-2729495	g__JAPUGB01	s__JAPUGB01 sp030614035
SemiBin2_CS05_SemiBin.115	140_1	d__Bacteria	p__Pseudomonadota	c__Gammaproteobacteria	o__GCA-2729495	f__GCA-2729495	g__JAPUGB01	s__JAPUGB01 sp030614035
ComeBin_CS05_bin.34773	141_1	d__Bacteria	p__Pseudomonadota	c__Gammaproteobacteria	o__GCA-2729495	f__GCA-2729495	g__	s__
CompleteBin_CS05.122	141_1	d__Bacteria	p__Pseudomonadota	c__Gammaproteobacteria	o__GCA-2729495	f__GCA-2729495	g__	s__
SemiBin2_CS05_SemiBin.71	141_1	d__Bacteria	p__Pseudomonadota	c__Gammaproteobacteria	o__GCA-2729495	f__GCA-2729495	g__	s__
ComeBin_CS05_bin.3425	142_1	d__Bacteria	p__Pseudomonadota	c__Gammaproteobacteria	o__Woeseiales	f__Woeseiaceae	g__JACZWL01	s__
CompleteBin_CS05.163	142_1	d__Bacteria	p__Pseudomonadota	c__Gammaproteobacteria	o__Woeseiales	f__Woeseiaceae	g__JACZWL01	s__
CompleteBin_CS05.202	142_1	d__Bacteria	p__Pseudomonadota	c__Gammaproteobacteria	o__Woeseiales	f__Woeseiaceae	g__JACZWL01	s__
MetaBAT2_CS05_bin.120	142_1	d__Bacteria	p__Pseudomonadota	c__Gammaproteobacteria	o__Woeseiales	f__Woeseiaceae	g__JACZWL01	s__
SemiBin2_CS05_SemiBin.11	142_1	d__Bacteria	p__Pseudomonadota	c__Gammaproteobacteria	o__Woeseiales	f__Woeseiaceae	g__JACZWL01	s__
CONCOCT_CS05_bin.73	143_1	d__Bacteria	p__Actinomycetota	c__Acidimicrobiia	o__UBA5794	f__ZC4RG35	g__JACZUI01	s__
ComeBin_CS05_bin.188104	143_1	d__Bacteria	p__Actinomycetota	c__Acidimicrobiia	o__UBA5794	f__ZC4RG35	g__JACZUI01	s__
CompleteBin_CS05.495	143_1	d__Bacteria	p__Actinomycetota	c__Acidimicrobiia	o__UBA5794	f__ZC4RG35	g__JACZUI01	s__
CONCOCT_CS01_bin.249	144_1	d__Bacteria	p__Eisenbacteria	c__RBG-16-71-46	o__CAIMUX01	f__WJJG01	g__	s__
ComeBin_CS01_bin.235687	144_1	d__Bacteria	p__Eisenbacteria	c__RBG-16-71-46	o__CAIMUX01	f__WJJG01	g__	s__
CompleteBin_CS01.821	144_1	d__Bacteria	p__Eisenbacteria	c__RBG-16-71-46	o__CAIMUX01	f__WJJG01	g__	s__
CONCOCT_CS05_bin.161	145_1	d__Bacteria	p__Gemmatimonadota	c__Gemmatimonadetes	o__Palauibacterales	f__Palauibacteraceae	g__Benthicola	s__
ComeBin_CS05_bin.98499	145_1	d__Bacteria	p__Gemmatimonadota	c__Gemmatimonadetes	o__Palauibacterales	f__Palauibacteraceae	g__Benthicola	s__
CompleteBin_CS05.282	145_1	d__Bacteria	p__Gemmatimonadota	c__Gemmatimonadetes	o__Palauibacterales	f__Palauibacteraceae	g__Benthicola	s__
CompleteBin_CS01.211	146_1	d__Bacteria	p__Gemmatimonadota	c__Gemmatimonadetes	o__Palauibacterales	f__Palauibacteraceae	g__Carthagonibacter	s__
CompleteBin_CS01.997	146_1	d__Bacteria	p__Gemmatimonadota	c__Gemmatimonadetes	o__Palauibacterales	f__Palauibacteraceae	g__Carthagonibacter	s__
CONCOCT_CS08_bin.111	146_2	d__Bacteria	p__Gemmatimonadota	c__Gemmatimonadetes	o__Palauibacterales	f__Palauibacteraceae	g__Carthagonibacter	s__
ComeBin_CS08_bin.129417	146_2	d__Bacteria	p__Gemmatimonadota	c__Gemmatimonadetes	o__Palauibacterales	f__Palauibacteraceae	g__Carthagonibacter	s__
CompleteBin_CS08.13	146_2	d__Bacteria	p__Gemmatimonadota	c__Gemmatimonadetes	o__Palauibacterales	f__Palauibacteraceae	g__Carthagonibacter	s__
MetaBAT2_CS08_bin.84	146_2	d__Bacteria	p__Gemmatimonadota	c__Gemmatimonadetes	o__Palauibacterales	f__Palauibacteraceae	g__Carthagonibacter	s__
VAMB_CS08_bin.17169	146_2	d__Bacteria	p__Gemmatimonadota	c__Gemmatimonadetes	o__Palauibacterales	f__Palauibacteraceae	g__Carthagonibacter	s__
CONCOCT_CS05_bin.14	147_0	d__Bacteria	p__VGIX01	c__VGIX01	o__VGIX01	f__	g__	s__
CONCOCT_CS08_bin.99	148_1	d__Bacteria	p__VGIX01	c__VGIX01	o__VGIX01	f__VGIX01	g__JALGZG01	s__
ComeBin_CS08_bin.177956	148_1	d__Bacteria	p__VGIX01	c__VGIX01	o__VGIX01	f__VGIX01	g__JALGZG01	s__
CompleteBin_CS08.316	148_1	d__Bacteria	p__VGIX01	c__VGIX01	o__VGIX01	f__VGIX01	g__JALGZG01	s__
ComeBin_CS01_bin.106115	148_2	d__Bacteria	p__VGIX01	c__VGIX01	o__VGIX01	f__VGIX01	g__JALGZG01	s__
CompleteBin_CS01.482	148_2	d__Bacteria	p__VGIX01	c__VGIX01	o__VGIX01	f__VGIX01	g__JALGZG01	s__
MetaBAT2_CS01_bin.82	148_2	d__Bacteria	p__VGIX01	c__VGIX01	o__VGIX01	f__VGIX01	g__JALGZG01	s__
CONCOCT_CS03_bin.6	148_3	d__Bacteria	p__VGIX01	c__VGIX01	o__VGIX01	f__VGIX01	g__JALGZG01	s__JALGZG01 sp025782345
ComeBin_CS03_bin.140518	148_3	d__Bacteria	p__VGIX01	c__VGIX01	o__VGIX01	f__VGIX01	g__JALGZG01	s__JALGZG01 sp025782345
CompleteBin_CS03.395	148_3	d__Bacteria	p__VGIX01	c__VGIX01	o__VGIX01	f__VGIX01	g__JALGZG01	s__JALGZG01 sp025782345
CONCOCT_CS12_bin.68	148_4	d__Bacteria	p__VGIX01	c__VGIX01	o__VGIX01	f__VGIX01	g__JALGZG01	s__JALGZG01 sp030613615
ComeBin_CS12_bin.104572	148_4	d__Bacteria	p__VGIX01	c__VGIX01	o__VGIX01	f__VGIX01	g__JALGZG01	s__JALGZG01 sp030613615
CompleteBin_CS12.235	148_4	d__Bacteria	p__VGIX01	c__VGIX01	o__VGIX01	f__VGIX01	g__JALGZG01	s__JALGZG01 sp030613615
MetaBAT2_CS12_bin.154	148_4	d__Bacteria	p__VGIX01	c__VGIX01	o__VGIX01	f__VGIX01	g__JALGZG01	s__JALGZG01 sp030613615
VAMB_CS12_bin.15244	148_4	d__Bacteria	p__VGIX01	c__VGIX01	o__VGIX01	f__VGIX01	g__JALGZG01	s__JALGZG01 sp030613615
ComeBin_CS10_bin.283658	149_0	d__Bacteria	p__Krumholzibacteriota	c__Krumholzibacteria	o__JAJRXK01	f__JAJRXK01	g__JAJRXK01	s__
ComeBin_CS12_bin.185991	15_1	d__Bacteria	p__Chloroflexota	c__Anaerolineae	o__UBA3071	f__UBA3071	g__UBA3071	s__
CompleteBin_CS12.365	15_1	d__Bacteria	p__Chloroflexota	c__Anaerolineae	o__UBA3071	f__UBA3071	g__UBA3071	s__
CompleteBin_CS12.491	15_1	d__Bacteria	p__Chloroflexota	c__Anaerolineae	o__UBA3071	f__UBA3071	g__UBA3071	s__
CONCOCT_CS03_bin.48	15_2	d__Bacteria	p__Chloroflexota	c__Anaerolineae	o__UBA3071	f__UBA3071	g__UBA3071	s__
ComeBin_CS03_bin.63890	15_2	d__Bacteria	p__Chloroflexota	c__Anaerolineae	o__UBA3071	f__UBA3071	g__UBA3071	s__
CompleteBin_CS03.158	15_2	d__Bacteria	p__Chloroflexota	c__Anaerolineae	o__UBA3071	f__UBA3071	g__UBA3071	s__
MetaBAT2_CS03_bin.117	15_2	d__Bacteria	p__Chloroflexota	c__Anaerolineae	o__UBA3071	f__UBA3071	g__UBA3071	s__
SemiBin2_CS03_SemiBin.210	15_2	d__Bacteria	p__Chloroflexota	c__Anaerolineae	o__UBA3071	f__UBA3071	g__UBA3071	s__
VAMB_CS03_bin.16388	15_2	d__Bacteria	p__Chloroflexota	c__Anaerolineae	o__UBA3071	f__UBA3071	g__UBA3071	s__
CONCOCT_CS12_bin.181	15_3	d__Bacteria	p__Chloroflexota	c__Anaerolineae	o__UBA3071	f__UBA3071	g__UBA3071	s__
CompleteBin_CS08.464	150_0	d__Bacteria	p__Actinomycetota	c__Acidimicrobiia	o__UBA5794	f__UBA5794	g__B3-G11	s__
ComeBin_CS10_bin.235466	151_1	d__Bacteria	p__Pseudomonadota	c__Gammaproteobacteria	o__GCA-001735895	f__GCA-001735895	g__GCA-001735895	s__
CompleteBin_CS10.759	151_1	d__Bacteria	p__Pseudomonadota	c__Gammaproteobacteria	o__GCA-001735895	f__GCA-001735895	g__GCA-001735895	s__
CompleteBin_CS08.46	151_2	d__Bacteria	p__Pseudomonadota	c__Gammaproteobacteria	o__GCA-001735895	f__GCA-001735895	g__GCA-001735895	s__
CompleteBin_CS08.43	152_0	d__Bacteria	p__Pseudomonadota	c__Gammaproteobacteria	o__GCA-001735895	f__GCA-001735895	g__GCA-001735895	s__
ComeBin_CS10_bin.123816	153_1	d__Bacteria	p__Pseudomonadota	c__Gammaproteobacteria	o__GCA-001735895	f__GCA-001735895	g__GCA-001735895	s__
CompleteBin_CS10.758	153_1	d__Bacteria	p__Pseudomonadota	c__Gammaproteobacteria	o__GCA-001735895	f__GCA-001735895	g__GCA-001735895	s__
MetaBAT2_CS10_bin.59	153_1	d__Bacteria	p__Pseudomonadota	c__Gammaproteobacteria	o__GCA-001735895	f__GCA-001735895	g__GCA-001735895	s__
ComeBin_CS05_bin.169178	154_1	d__Bacteria	p__Pseudomonadota	c__Gammaproteobacteria	o__GCA-001735895	f__GCA-001735895	g__GCA-001735895	s__
CompleteBin_CS05.444	154_1	d__Bacteria	p__Pseudomonadota	c__Gammaproteobacteria	o__GCA-001735895	f__GCA-001735895	g__GCA-001735895	s__
CONCOCT_CS08_bin.60	154_2	d__Bacteria	p__Pseudomonadota	c__Gammaproteobacteria	o__GCA-001735895	f__GCA-001735895	g__GCA-001735895	s__
ComeBin_CS08_bin.149576	154_2	d__Bacteria	p__Pseudomonadota	c__Gammaproteobacteria	o__GCA-001735895	f__GCA-001735895	g__GCA-001735895	s__
CompleteBin_CS08.266	154_2	d__Bacteria	p__Pseudomonadota	c__Gammaproteobacteria	o__GCA-001735895	f__GCA-001735895	g__GCA-001735895	s__
MetaBAT2_CS08_bin.14	154_2	d__Bacteria	p__Pseudomonadota	c__Gammaproteobacteria	o__GCA-001735895	f__GCA-001735895	g__GCA-001735895	s__
ComeBin_CS10_bin.230194	154_3	d__Bacteria	p__Pseudomonadota	c__Gammaproteobacteria	o__GCA-001735895	f__GCA-001735895	g__GCA-001735895	s__
ComeBin_CS08_bin.3415	155_1	d__Bacteria	p__Pseudomonadota	c__Gammaproteobacteria	o__Woeseiales	f__Woeseiaceae	g__SZUA-117	s__
CompleteBin_CS08.309	155_1	d__Bacteria	p__Pseudomonadota	c__Gammaproteobacteria	o__Woeseiales	f__Woeseiaceae	g__SZUA-117	s__
CompleteBin_CS08.617	155_1	d__Bacteria	p__Pseudomonadota	c__Gammaproteobacteria	o__Woeseiales	f__Woeseiaceae	g__SZUA-117	s__
MetaBAT2_CS08_bin.155	155_1	d__Bacteria	p__Pseudomonadota	c__Gammaproteobacteria	o__Woeseiales	f__Woeseiaceae	g__SZUA-117	s__
SemiBin2_CS08_SemiBin.6	155_1	d__Bacteria	p__Pseudomonadota	c__Gammaproteobacteria	o__Woeseiales	f__Woeseiaceae	g__SZUA-117	s__
ComeBin_CS08_bin.4084	156_1	d__Bacteria	p__Pseudomonadota	c__Gammaproteobacteria	o__Woeseiales	f__Woeseiaceae	g__UBA1847	s__
CompleteBin_CS08.33	156_1	d__Bacteria	p__Pseudomonadota	c__Gammaproteobacteria	o__Woeseiales	f__Woeseiaceae	g__UBA1847	s__
MetaBAT2_CS08_bin.87	156_1	d__Bacteria	p__Pseudomonadota	c__Gammaproteobacteria	o__Woeseiales	f__Woeseiaceae	g__UBA1847	s__
SemiBin2_CS08_SemiBin.8	156_1	d__Bacteria	p__Pseudomonadota	c__Gammaproteobacteria	o__Woeseiales	f__Woeseiaceae	g__UBA1847	s__
CompleteBin_CS08.177	157_1	d__Bacteria	p__Pseudomonadota	c__Gammaproteobacteria	o__Woeseiales	f__Woeseiaceae	g__UBA1847	s__
CompleteBin_CS10.714	157_2	d__Bacteria	p__Pseudomonadota	c__Gammaproteobacteria	o__Woeseiales	f__Woeseiaceae	g__UBA1847	s__
ComeBin_CS08_bin.84058	158_1	d__Bacteria	p__Pseudomonadota	c__Gammaproteobacteria	o__Woeseiales	f__Woeseiaceae	g__QNFK01	s__
CompleteBin_CS08.150	158_1	d__Bacteria	p__Pseudomonadota	c__Gammaproteobacteria	o__Woeseiales	f__Woeseiaceae	g__QNFK01	s__
SemiBin2_CS08_SemiBin.148	158_1	d__Bacteria	p__Pseudomonadota	c__Gammaproteobacteria	o__Woeseiales	f__Woeseiaceae	g__QNFK01	s__
VAMB_CS08_bin.15224	158_1	d__Bacteria	p__Pseudomonadota	c__Gammaproteobacteria	o__Woeseiales	f__Woeseiaceae	g__QNFK01	s__
ComeBin_CS08_bin.16105	159_1	d__Bacteria	p__Pseudomonadota	c__Gammaproteobacteria	o__Woeseiales	f__Woeseiaceae	g__QNFK01	s__
CompleteBin_CS08.487	159_1	d__Bacteria	p__Pseudomonadota	c__Gammaproteobacteria	o__Woeseiales	f__Woeseiaceae	g__QNFK01	s__
SemiBin2_CS08_SemiBin.52	159_1	d__Bacteria	p__Pseudomonadota	c__Gammaproteobacteria	o__Woeseiales	f__Woeseiaceae	g__QNFK01	s__
VAMB_CS08_bin.24037	159_1	d__Bacteria	p__Pseudomonadota	c__Gammaproteobacteria	o__Woeseiales	f__Woeseiaceae	g__QNFK01	s__
CompleteBin_CS10.34	159_2	d__Bacteria	p__Pseudomonadota	c__Gammaproteobacteria	o__Woeseiales	f__Woeseiaceae	g__QNFK01	s__
CompleteBin_CS12.376	16_1	d__Bacteria	p__Chloroflexota	c__Anaerolineae	o__B4-G1	f__B4-G1	g__JAFGED01	s__
CompleteBin_CS12.484	16_1	d__Bacteria	p__Chloroflexota	c__Anaerolineae	o__B4-G1	f__B4-G1	g__JAFGED01	s__
MetaBAT2_CS12_bin.122	16_1	d__Bacteria	p__Chloroflexota	c__Anaerolineae	o__B4-G1	f__B4-G1	g__JAFGED01	s__
ComeBin_CS08_bin.61567	160_1	d__Bacteria	p__Pseudomonadota	c__Gammaproteobacteria	o__Woeseiales	f__Woeseiaceae	g__JAACFB01	s__
CompleteBin_CS08.105	160_1	d__Bacteria	p__Pseudomonadota	c__Gammaproteobacteria	o__Woeseiales	f__Woeseiaceae	g__JAACFB01	s__
CompleteBin_CS08.107	160_1	d__Bacteria	p__Pseudomonadota	c__Gammaproteobacteria	o__Woeseiales	f__Woeseiaceae	g__JAACFB01	s__
MetaBAT2_CS08_bin.181	160_1	d__Bacteria	p__Pseudomonadota	c__Gammaproteobacteria	o__Woeseiales	f__Woeseiaceae	g__JAACFB01	s__
ComeBin_CS08_bin.143801	161_1	d__Bacteria	p__Pseudomonadota	c__Gammaproteobacteria	o__Woeseiales	f__Woeseiaceae	g__JAACFB01	s__
CompleteBin_CS08.175	161_1	d__Bacteria	p__Pseudomonadota	c__Gammaproteobacteria	o__Woeseiales	f__Woeseiaceae	g__JAACFB01	s__
ComeBin_CS10_bin.149493	161_2	d__Bacteria	p__Pseudomonadota	c__Gammaproteobacteria	o__Woeseiales	f__Woeseiaceae	g__JAACFB01	s__
CompleteBin_CS10.710	161_2	d__Bacteria	p__Pseudomonadota	c__Gammaproteobacteria	o__Woeseiales	f__Woeseiaceae	g__JAACFB01	s__
CompleteBin_CS10.711	161_2	d__Bacteria	p__Pseudomonadota	c__Gammaproteobacteria	o__Woeseiales	f__Woeseiaceae	g__JAACFB01	s__
ComeBin_CS08_bin.142185	162_1	d__Bacteria	p__Acidobacteriota	c__Thermoanaerobaculia	o__Thermoanaerobaculales	f__Sulfomarinibacteraceae	g__Sulfomarinibacter	s__
CompleteBin_CS08.251	162_1	d__Bacteria	p__Acidobacteriota	c__Thermoanaerobaculia	o__Thermoanaerobaculales	f__Sulfomarinibacteraceae	g__Sulfomarinibacter	s__
MetaBAT2_CS08_bin.55	162_1	d__Bacteria	p__Acidobacteriota	c__Thermoanaerobaculia	o__Thermoanaerobaculales	f__Sulfomarinibacteraceae	g__Sulfomarinibacter	s__
VAMB_CS08_bin.20759	162_1	d__Bacteria	p__Acidobacteriota	c__Thermoanaerobaculia	o__Thermoanaerobaculales	f__Sulfomarinibacteraceae	g__Sulfomarinibacter	s__
ComeBin_CS05_bin.122661	162_2	d__Bacteria	p__Acidobacteriota	c__Thermoanaerobaculia	o__Thermoanaerobaculales	f__Sulfomarinibacteraceae	g__Sulfomarinibacter	s__
CompleteBin_CS05.144	162_2	d__Bacteria	p__Acidobacteriota	c__Thermoanaerobaculia	o__Thermoanaerobaculales	f__Sulfomarinibacteraceae	g__Sulfomarinibacter	s__
CompleteBin_CS05.145	162_2	d__Bacteria	p__Acidobacteriota	c__Thermoanaerobaculia	o__Thermoanaerobaculales	f__Sulfomarinibacteraceae	g__Sulfomarinibacter	s__
CompleteBin_CS05.146	162_2	d__Bacteria	p__Acidobacteriota	c__Thermoanaerobaculia	o__Thermoanaerobaculales	f__Sulfomarinibacteraceae	g__Sulfomarinibacter	s__
CompleteBin_CS05.2144	162_2	d__Bacteria	p__Acidobacteriota	c__Thermoanaerobaculia	o__Thermoanaerobaculales	f__Sulfomarinibacteraceae	g__Sulfomarinibacter	s__
CompleteBin_CS05.632	162_2	d__Bacteria	p__Acidobacteriota	c__Thermoanaerobaculia	o__Thermoanaerobaculales	f__Sulfomarinibacteraceae	g__Sulfomarinibacter	s__
MetaBAT2_CS05_bin.102	162_2	d__Bacteria	p__Acidobacteriota	c__Thermoanaerobaculia	o__Thermoanaerobaculales	f__Sulfomarinibacteraceae	g__Sulfomarinibacter	s__
ComeBin_CS03_bin.115677	163_1	d__Bacteria	p__Acidobacteriota	c__Thermoanaerobaculia	o__Thermoanaerobaculales	f__Sulfomarinibacteraceae	g__Sulfomarinibacter	s__Sulfomarinibacter sp029938595
CompleteBin_CS03.323	163_1	d__Bacteria	p__Acidobacteriota	c__Thermoanaerobaculia	o__Thermoanaerobaculales	f__Sulfomarinibacteraceae	g__Sulfomarinibacter	s__Sulfomarinibacter sp029938595
CompleteBin_CS08.170	163_2	d__Bacteria	p__Acidobacteriota	c__Thermoanaerobaculia	o__Thermoanaerobaculales	f__Sulfomarinibacteraceae	g__Sulfomarinibacter	s__Sulfomarinibacter sp029938595
ComeBin_CS01_bin.67810	164_1	d__Bacteria	p__Acidobacteriota	c__Thermoanaerobaculia	o__Thermoanaerobaculales	f__Sulfomarinibacteraceae	g__JAIOSJ01	s__JAIOSJ01 sp021107705
CompleteBin_CS01.197	164_1	d__Bacteria	p__Acidobacteriota	c__Thermoanaerobaculia	o__Thermoanaerobaculales	f__Sulfomarinibacteraceae	g__JAIOSJ01	s__JAIOSJ01 sp021107705
CompleteBin_CS01.374	164_1	d__Bacteria	p__Acidobacteriota	c__Thermoanaerobaculia	o__Thermoanaerobaculales	f__Sulfomarinibacteraceae	g__JAIOSJ01	s__JAIOSJ01 sp021107705
SemiBin2_CS01_SemiBin.119	164_1	d__Bacteria	p__Acidobacteriota	c__Thermoanaerobaculia	o__Thermoanaerobaculales	f__Sulfomarinibacteraceae	g__JAIOSJ01	s__JAIOSJ01 sp021107705
ComeBin_CS01_bin.25718	165_1	d__Bacteria	p__Acidobacteriota	c__Thermoanaerobaculia	o__Thermoanaerobaculales	f__Sulfomarinibacteraceae	g__DAOWGJ01	s__
CompleteBin_CS01.112	165_1	d__Bacteria	p__Acidobacteriota	c__Thermoanaerobaculia	o__Thermoanaerobaculales	f__Sulfomarinibacteraceae	g__DAOWGJ01	s__
CompleteBin_CS01.535	165_1	d__Bacteria	p__Acidobacteriota	c__Thermoanaerobaculia	o__Thermoanaerobaculales	f__Sulfomarinibacteraceae	g__DAOWGJ01	s__
MetaBAT2_CS01_bin.134	165_1	d__Bacteria	p__Acidobacteriota	c__Thermoanaerobaculia	o__Thermoanaerobaculales	f__Sulfomarinibacteraceae	g__DAOWGJ01	s__
SemiBin2_CS01_SemiBin.112	165_1	d__Bacteria	p__Acidobacteriota	c__Thermoanaerobaculia	o__Thermoanaerobaculales	f__Sulfomarinibacteraceae	g__DAOWGJ01	s__
VAMB_CS01_bin.16079	165_1	d__Bacteria	p__Acidobacteriota	c__Thermoanaerobaculia	o__Thermoanaerobaculales	f__Sulfomarinibacteraceae	g__DAOWGJ01	s__
ComeBin_CS03_bin.36264	166_1	d__Bacteria	p__Zixibacteria	c__MSB-5A5	o__GN15	f__FEB-12	g__JAJRTA01	s__JAJRTA01 sp030619425
CompleteBin_CS03.9	166_1	d__Bacteria	p__Zixibacteria	c__MSB-5A5	o__GN15	f__FEB-12	g__JAJRTA01	s__JAJRTA01 sp030619425
MetaBAT2_CS03_bin.115	166_1	d__Bacteria	p__Zixibacteria	c__MSB-5A5	o__GN15	f__FEB-12	g__JAJRTA01	s__JAJRTA01 sp030619425
SemiBin2_CS03_SemiBin.132	166_1	d__Bacteria	p__Zixibacteria	c__MSB-5A5	o__GN15	f__FEB-12	g__JAJRTA01	s__JAJRTA01 sp030619425
VAMB_CS03_bin.30543	166_1	d__Bacteria	p__Zixibacteria	c__MSB-5A5	o__GN15	f__FEB-12	g__JAJRTA01	s__JAJRTA01 sp030619425
CONCOCT_CS01_bin.98	167_1	d__Bacteria	p__JAGLYR01	c__JAGLYR01	o__JALGWA01	f__JALGWB01	g__JAUVJV01	s__JAUVJV01 sp030592245
ComeBin_CS01_bin.102432	167_1	d__Bacteria	p__JAGLYR01	c__JAGLYR01	o__JALGWA01	f__JALGWB01	g__JAUVJV01	s__JAUVJV01 sp030592245
CompleteBin_CS01.475	167_1	d__Bacteria	p__JAGLYR01	c__JAGLYR01	o__JALGWA01	f__JALGWB01	g__JAUVJV01	s__JAUVJV01 sp030592245
CompleteBin_CS01.476	167_1	d__Bacteria	p__JAGLYR01	c__JAGLYR01	o__JALGWA01	f__JALGWB01	g__JAUVJV01	s__JAUVJV01 sp030592245
ComeBin_CS12_bin.167052	168_1	d__Bacteria	p__Verrucomicrobiota	c__Kiritimatiellia	o__Kiritimatiellales	f__Pontiellaceae	g__Pontiella	s__
CompleteBin_CS12.134	168_1	d__Bacteria	p__Verrucomicrobiota	c__Kiritimatiellia	o__Kiritimatiellales	f__Pontiellaceae	g__Pontiella	s__
CONCOCT_CS01_bin.7	169_1	d__Bacteria	p__Chloroflexota	c__Dehalococcoidia	o__GIF9	f__AB-539-J10	g__SKVJ01	s__
ComeBin_CS01_bin.50774	169_1	d__Bacteria	p__Chloroflexota	c__Dehalococcoidia	o__GIF9	f__AB-539-J10	g__SKVJ01	s__
CompleteBin_CS01.179	169_1	d__Bacteria	p__Chloroflexota	c__Dehalococcoidia	o__GIF9	f__AB-539-J10	g__SKVJ01	s__
CompleteBin_CS01.315	169_1	d__Bacteria	p__Chloroflexota	c__Dehalococcoidia	o__GIF9	f__AB-539-J10	g__SKVJ01	s__
MetaBAT2_CS01_bin.83	169_1	d__Bacteria	p__Chloroflexota	c__Dehalococcoidia	o__GIF9	f__AB-539-J10	g__SKVJ01	s__
SemiBin2_CS01_SemiBin.179	169_1	d__Bacteria	p__Chloroflexota	c__Dehalococcoidia	o__GIF9	f__AB-539-J10	g__SKVJ01	s__
VAMB_CS01_bin.17443	169_1	d__Bacteria	p__Chloroflexota	c__Dehalococcoidia	o__GIF9	f__AB-539-J10	g__SKVJ01	s__
CONCOCT_CS12_bin.94	169_2	d__Bacteria	p__Chloroflexota	c__Dehalococcoidia	o__GIF9	f__AB-539-J10	g__SKVJ01	s__
ComeBin_CS12_bin.63874	169_2	d__Bacteria	p__Chloroflexota	c__Dehalococcoidia	o__GIF9	f__AB-539-J10	g__SKVJ01	s__
CompleteBin_CS12.131	169_2	d__Bacteria	p__Chloroflexota	c__Dehalococcoidia	o__GIF9	f__AB-539-J10	g__SKVJ01	s__
MetaBAT2_CS12_bin.123	169_2	d__Bacteria	p__Chloroflexota	c__Dehalococcoidia	o__GIF9	f__AB-539-J10	g__SKVJ01	s__
SemiBin2_CS12_SemiBin.191	169_2	d__Bacteria	p__Chloroflexota	c__Dehalococcoidia	o__GIF9	f__AB-539-J10	g__SKVJ01	s__
VAMB_CS12_bin.40003	169_2	d__Bacteria	p__Chloroflexota	c__Dehalococcoidia	o__GIF9	f__AB-539-J10	g__SKVJ01	s__
ComeBin_CS01_bin.266759	17_1	d__Bacteria	p__Chloroflexota	c__Anaerolineae	o__B4-G1	f__B4-G1	g__B4-G1	s__
CompleteBin_CS01.249	17_1	d__Bacteria	p__Chloroflexota	c__Anaerolineae	o__B4-G1	f__B4-G1	g__B4-G1	s__
CONCOCT_CS01_bin.77	170_1	d__Bacteria	p__Actinomycetota	c__Acidimicrobiia	o__UBA5794	f__UBA11373	g__	s__
ComeBin_CS01_bin.0	170_1	d__Bacteria	p__Actinomycetota	c__Acidimicrobiia	o__UBA5794	f__UBA11373	g__	s__
CompleteBin_CS01.5	170_1	d__Bacteria	p__Actinomycetota	c__Acidimicrobiia	o__UBA5794	f__UBA11373	g__	s__
MetaBAT2_CS01_bin.74	170_1	d__Bacteria	p__Actinomycetota	c__Acidimicrobiia	o__UBA5794	f__UBA11373	g__	s__
SemiBin2_CS01_SemiBin.0	170_1	d__Bacteria	p__Actinomycetota	c__Acidimicrobiia	o__UBA5794	f__UBA11373	g__	s__
VAMB_CS01_bin.17357	170_1	d__Bacteria	p__Actinomycetota	c__Acidimicrobiia	o__UBA5794	f__UBA11373	g__	s__
CONCOCT_CS08_bin.168	171_1	d__Bacteria	p__Pseudomonadota	c__Alphaproteobacteria	o__Geminicoccales	f__Geminicoccaceae	g__	s__
ComeBin_CS08_bin.232172	171_1	d__Bacteria	p__Pseudomonadota	c__Alphaproteobacteria	o__Geminicoccales	f__Geminicoccaceae	g__	s__
CompleteBin_CS08.310	171_1	d__Bacteria	p__Pseudomonadota	c__Alphaproteobacteria	o__Geminicoccales	f__Geminicoccaceae	g__	s__
CONCOCT_CS03_bin.130	172_1	d__Bacteria	p__Acidobacteriota	c__Aminicenantia	o__Aminicenantales	f__Aminicenantaceae	g__DAOVDI01	s__DAOVDI01 sp030669585
ComeBin_CS03_bin.43306	172_1	d__Bacteria	p__Acidobacteriota	c__Aminicenantia	o__Aminicenantales	f__Aminicenantaceae	g__DAOVDI01	s__DAOVDI01 sp030669585
CompleteBin_CS03.90	172_1	d__Bacteria	p__Acidobacteriota	c__Aminicenantia	o__Aminicenantales	f__Aminicenantaceae	g__DAOVDI01	s__DAOVDI01 sp030669585
SemiBin2_CS03_SemiBin.150	172_1	d__Bacteria	p__Acidobacteriota	c__Aminicenantia	o__Aminicenantales	f__Aminicenantaceae	g__DAOVDI01	s__DAOVDI01 sp030669585
VAMB_CS03_bin.14851	172_1	d__Bacteria	p__Acidobacteriota	c__Aminicenantia	o__Aminicenantales	f__Aminicenantaceae	g__DAOVDI01	s__DAOVDI01 sp030669585
CONCOCT_CS03_bin.204	173_1	d__Bacteria	p__Zixibacteria	c__MSB-5A5	o__GN15	f__JAAZOE01	g__	s__
ComeBin_CS03_bin.63052	173_1	d__Bacteria	p__Zixibacteria	c__MSB-5A5	o__GN15	f__JAAZOE01	g__	s__
CompleteBin_CS03.156	173_1	d__Bacteria	p__Zixibacteria	c__MSB-5A5	o__GN15	f__JAAZOE01	g__	s__
MetaBAT2_CS03_bin.85	173_1	d__Bacteria	p__Zixibacteria	c__MSB-5A5	o__GN15	f__JAAZOE01	g__	s__
CONCOCT_CS01_bin.189	174_1	d__Bacteria	p__Acidobacteriota	c__Aminicenantia	o__Aminicenantales	f__Aminicenantaceae	g__JAUWSR01	s__JAUWSR01 sp030620655
ComeBin_CS01_bin.259803	174_1	d__Bacteria	p__Acidobacteriota	c__Aminicenantia	o__Aminicenantales	f__Aminicenantaceae	g__JAUWSR01	s__JAUWSR01 sp030620655
CompleteBin_CS01.25	174_1	d__Bacteria	p__Acidobacteriota	c__Aminicenantia	o__Aminicenantales	f__Aminicenantaceae	g__JAUWSR01	s__JAUWSR01 sp030620655
CompleteBin_CS01.890	174_1	d__Bacteria	p__Acidobacteriota	c__Aminicenantia	o__Aminicenantales	f__Aminicenantaceae	g__JAUWSR01	s__JAUWSR01 sp030620655
ComeBin_CS08_bin.124569	174_2	d__Bacteria	p__Acidobacteriota	c__Aminicenantia	o__Aminicenantales	f__Aminicenantaceae	g__JAUWSR01	s__JAUWSR01 sp030620655
CompleteBin_CS08.230	174_2	d__Bacteria	p__Acidobacteriota	c__Aminicenantia	o__Aminicenantales	f__Aminicenantaceae	g__JAUWSR01	s__JAUWSR01 sp030620655
MetaBAT2_CS08_bin.52	174_2	d__Bacteria	p__Acidobacteriota	c__Aminicenantia	o__Aminicenantales	f__Aminicenantaceae	g__JAUWSR01	s__JAUWSR01 sp030620655
VAMB_CS08_bin.16445	174_2	d__Bacteria	p__Acidobacteriota	c__Aminicenantia	o__Aminicenantales	f__Aminicenantaceae	g__JAUWSR01	s__JAUWSR01 sp030620655
CompleteBin_CS03.613	174_3	d__Bacteria	p__Acidobacteriota	c__Aminicenantia	o__Aminicenantales	f__Aminicenantaceae	g__JAUWSR01	s__JAUWSR01 sp030620655
CompleteBin_CS05.692	174_4	d__Bacteria	p__Acidobacteriota	c__Aminicenantia	o__Aminicenantales	f__Aminicenantaceae	g__JAUWSR01	s__JAUWSR01 sp030620655
CONCOCT_CS08_bin.59	175_1	d__Bacteria	p__Pseudomonadota	c__Gammaproteobacteria	o__Chromatiales	f__Sedimenticolaceae	g__JAUXBK01	s__JAUXBK01 sp030590525
ComeBin_CS08_bin.39947	175_1	d__Bacteria	p__Pseudomonadota	c__Gammaproteobacteria	o__Chromatiales	f__Sedimenticolaceae	g__JAUXBK01	s__JAUXBK01 sp030590525
CompleteBin_CS08.27	175_1	d__Bacteria	p__Pseudomonadota	c__Gammaproteobacteria	o__Chromatiales	f__Sedimenticolaceae	g__JAUXBK01	s__JAUXBK01 sp030590525
MetaBAT2_CS08_bin.108	175_1	d__Bacteria	p__Pseudomonadota	c__Gammaproteobacteria	o__Chromatiales	f__Sedimenticolaceae	g__JAUXBK01	s__JAUXBK01 sp030590525
SemiBin2_CS08_SemiBin.87	175_1	d__Bacteria	p__Pseudomonadota	c__Gammaproteobacteria	o__Chromatiales	f__Sedimenticolaceae	g__JAUXBK01	s__JAUXBK01 sp030590525
VAMB_CS08_bin.17240	175_1	d__Bacteria	p__Pseudomonadota	c__Gammaproteobacteria	o__Chromatiales	f__Sedimenticolaceae	g__JAUXBK01	s__JAUXBK01 sp030590525
CompleteBin_CS10.681	175_2	d__Bacteria	p__Pseudomonadota	c__Gammaproteobacteria	o__Chromatiales	f__Sedimenticolaceae	g__JAUXBK01	s__
CompleteBin_CS08.383	176_0	d__Bacteria	p__Pseudomonadota	c__Gammaproteobacteria	o__Chromatiales	f__Sedimenticolaceae	g__JAUXBK01	s__
CONCOCT_CS01_bin.262	177_1	d__Archaea	p__Thermoplasmatota	c__JASLWR01	o__JASLWR01	f__	g__	s__
ComeBin_CS01_bin.4130	177_1	d__Archaea	p__Thermoplasmatota	c__JASLWR01	o__JASLWR01	f__	g__	s__
CompleteBin_CS01.432	177_1	d__Archaea	p__Thermoplasmatota	c__JASLWR01	o__JASLWR01	f__	g__	s__
CompleteBin_CS01.614	177_1	d__Archaea	p__Thermoplasmatota	c__JASLWR01	o__JASLWR01	f__	g__	s__
MetaBAT2_CS01_bin.85	177_1	d__Archaea	p__Thermoplasmatota	c__JASLWR01	o__JASLWR01	f__	g__	s__
SemiBin2_CS01_SemiBin.47	177_1	d__Archaea	p__Thermoplasmatota	c__JASLWR01	o__JASLWR01	f__	g__	s__
VAMB_CS01_bin.21773	177_1	d__Archaea	p__Thermoplasmatota	c__JASLWR01	o__JASLWR01	f__	g__	s__
ComeBin_CS03_bin.322	178_1	d__Bacteria	p__TA06_A	c__DG-26_A	o__SM23-81	f__SM23-81	g__DAOVRJ01	s__DAOVRJ01 sp030628225
CompleteBin_CS03.207	178_1	d__Bacteria	p__TA06_A	c__DG-26_A	o__SM23-81	f__SM23-81	g__DAOVRJ01	s__DAOVRJ01 sp030628225
MetaBAT2_CS03_bin.97	178_1	d__Bacteria	p__TA06_A	c__DG-26_A	o__SM23-81	f__SM23-81	g__DAOVRJ01	s__DAOVRJ01 sp030628225
SemiBin2_CS03_SemiBin.3	178_1	d__Bacteria	p__TA06_A	c__DG-26_A	o__SM23-81	f__SM23-81	g__DAOVRJ01	s__DAOVRJ01 sp030628225
VAMB_CS03_bin.14588	178_1	d__Bacteria	p__TA06_A	c__DG-26_A	o__SM23-81	f__SM23-81	g__DAOVRJ01	s__DAOVRJ01 sp030628225
CONCOCT_CS01_bin.150	179_1	d__Bacteria	p__Desulfobacterota	c__DSWW01	o__DSWW01	f__DSWW01	g__S015-6	s__
CompleteBin_CS01.19	179_1	d__Bacteria	p__Desulfobacterota	c__DSWW01	o__DSWW01	f__DSWW01	g__S015-6	s__
CompleteBin_CS01.925	179_1	d__Bacteria	p__Desulfobacterota	c__DSWW01	o__DSWW01	f__DSWW01	g__S015-6	s__
CONCOCT_CS12_bin.45	18_1	d__Bacteria	p__Chloroflexota	c__Anaerolineae	o__B4-G1	f__B4-G1	g__JAUWNP01	s__JAUWNP01 sp030612585
ComeBin_CS12_bin.66670	18_1	d__Bacteria	p__Chloroflexota	c__Anaerolineae	o__B4-G1	f__B4-G1	g__JAUWNP01	s__JAUWNP01 sp030612585
CompleteBin_CS12.136	18_1	d__Bacteria	p__Chloroflexota	c__Anaerolineae	o__B4-G1	f__B4-G1	g__JAUWNP01	s__JAUWNP01 sp030612585
MetaBAT2_CS12_bin.194	18_1	d__Bacteria	p__Chloroflexota	c__Anaerolineae	o__B4-G1	f__B4-G1	g__JAUWNP01	s__JAUWNP01 sp030612585
ComeBin_CS03_bin.71380	18_2	d__Bacteria	p__Chloroflexota	c__Anaerolineae	o__B4-G1	f__B4-G1	g__JAUWNP01	s__
CompleteBin_CS03.189	18_2	d__Bacteria	p__Chloroflexota	c__Anaerolineae	o__B4-G1	f__B4-G1	g__JAUWNP01	s__
MetaBAT2_CS03_bin.36	18_2	d__Bacteria	p__Chloroflexota	c__Anaerolineae	o__B4-G1	f__B4-G1	g__JAUWNP01	s__
SemiBin2_CS03_SemiBin.229	18_2	d__Bacteria	p__Chloroflexota	c__Anaerolineae	o__B4-G1	f__B4-G1	g__JAUWNP01	s__
VAMB_CS03_bin.15866	18_2	d__Bacteria	p__Chloroflexota	c__Anaerolineae	o__B4-G1	f__B4-G1	g__JAUWNP01	s__
ComeBin_CS08_bin.109891	180_1	d__Bacteria	p__Krumholzibacteriota	c__Krumholzibacteria	o__LZORAL124-64-63	f__LZORAL124-64-63	g__JAGLCY01	s__
CompleteBin_CS08.199	180_1	d__Bacteria	p__Krumholzibacteriota	c__Krumholzibacteria	o__LZORAL124-64-63	f__LZORAL124-64-63	g__JAGLCY01	s__
MetaBAT2_CS08_bin.137	180_1	d__Bacteria	p__Krumholzibacteriota	c__Krumholzibacteria	o__LZORAL124-64-63	f__LZORAL124-64-63	g__JAGLCY01	s__
ComeBin_CS10_bin.154218	180_2	d__Bacteria	p__Krumholzibacteriota	c__Krumholzibacteria	o__LZORAL124-64-63	f__LZORAL124-64-63	g__JAGLCY01	s__
CompleteBin_CS10.806	180_2	d__Bacteria	p__Krumholzibacteriota	c__Krumholzibacteria	o__LZORAL124-64-63	f__LZORAL124-64-63	g__JAGLCY01	s__
CompleteBin_CS10.825	180_2	d__Bacteria	p__Krumholzibacteriota	c__Krumholzibacteria	o__LZORAL124-64-63	f__LZORAL124-64-63	g__JAGLCY01	s__
ComeBin_CS01_bin.124313	181_0	d__Bacteria	p__Krumholzibacteriota	c__Krumholzibacteria	o__LZORAL124-64-63	f__LZORAL124-64-63	g__JAGLCY01	s__
ComeBin_CS10_bin.238506	182_1	d__Bacteria	p__Nitrospinota	c__Nitrospinia	o__Nitrospinales	f__VA-1	g__JADFGI01	s__
CompleteBin_CS10.853	182_1	d__Bacteria	p__Nitrospinota	c__Nitrospinia	o__Nitrospinales	f__VA-1	g__JADFGI01	s__
CompleteBin_CS10.854	182_1	d__Bacteria	p__Nitrospinota	c__Nitrospinia	o__Nitrospinales	f__VA-1	g__JADFGI01	s__
CONCOCT_CS10_bin.118	183_1	d__Bacteria	p__Nitrospinota	c__Nitrospinia	o__Nitrospinales	f__Nitrospinaceae	g__SZUA-226	s__
ComeBin_CS10_bin.165160	183_1	d__Bacteria	p__Nitrospinota	c__Nitrospinia	o__Nitrospinales	f__Nitrospinaceae	g__SZUA-226	s__
CompleteBin_CS10.855	183_1	d__Bacteria	p__Nitrospinota	c__Nitrospinia	o__Nitrospinales	f__Nitrospinaceae	g__SZUA-226	s__
ComeBin_CS01_bin.181637	184_1	d__Bacteria	p__Zixibacteria	c__MSB-5A5	o__CAIYYT01	f__CAIYYT01	g__	s__
CompleteBin_CS01.132	184_1	d__Bacteria	p__Zixibacteria	c__MSB-5A5	o__CAIYYT01	f__CAIYYT01	g__	s__
CompleteBin_CS01.659	184_1	d__Bacteria	p__Zixibacteria	c__MSB-5A5	o__CAIYYT01	f__CAIYYT01	g__	s__
ComeBin_CS01_bin.218101	185_1	d__Bacteria	p__Krumholzibacteriota	c__Krumholzibacteria	o__LZORAL124-64-63	f__LZORAL124-64-63	g__Glo-17	s__
CompleteBin_CS01.138	185_1	d__Bacteria	p__Krumholzibacteriota	c__Krumholzibacteria	o__LZORAL124-64-63	f__LZORAL124-64-63	g__Glo-17	s__
CompleteBin_CS01.139	185_1	d__Bacteria	p__Krumholzibacteriota	c__Krumholzibacteria	o__LZORAL124-64-63	f__LZORAL124-64-63	g__Glo-17	s__
CompleteBin_CS01.204	185_1	d__Bacteria	p__Krumholzibacteriota	c__Krumholzibacteria	o__LZORAL124-64-63	f__LZORAL124-64-63	g__Glo-17	s__
CompleteBin_CS01.755	185_1	d__Bacteria	p__Krumholzibacteriota	c__Krumholzibacteria	o__LZORAL124-64-63	f__LZORAL124-64-63	g__Glo-17	s__
CONCOCT_CS01_bin.62	186_1	d__Bacteria	p__Planctomycetota	c__JAJSAM01	o__JAJSAM01	f__JAJSAM01	g__JAJSAM01	s__
CompleteBin_CS01.81	186_1	d__Bacteria	p__Planctomycetota	c__JAJSAM01	o__JAJSAM01	f__JAJSAM01	g__JAJSAM01	s__
CONCOCT_CS05_bin.209	187_1	d__Bacteria	p__Acidobacteriota	c__UBA6911	o__RPQK01	f__RPQK01	g__JADFOI01	s__
ComeBin_CS05_bin.100151	187_1	d__Bacteria	p__Acidobacteriota	c__UBA6911	o__RPQK01	f__RPQK01	g__JADFOI01	s__
CompleteBin_CS05.126	187_1	d__Bacteria	p__Acidobacteriota	c__UBA6911	o__RPQK01	f__RPQK01	g__JADFOI01	s__
MetaBAT2_CS05_bin.135	187_1	d__Bacteria	p__Acidobacteriota	c__UBA6911	o__RPQK01	f__RPQK01	g__JADFOI01	s__
CONCOCT_CS05_bin.178	188_1	d__Bacteria	p__JAUVQV01	c__JAUVQV01	o__JAUVQV01	f__JAUVQV01	g__JAUWCW01	s__JAUWCW01 sp030609125
ComeBin_CS05_bin.9046	188_1	d__Bacteria	p__JAUVQV01	c__JAUVQV01	o__JAUVQV01	f__JAUVQV01	g__JAUWCW01	s__JAUWCW01 sp030609125
CompleteBin_CS05.533	188_1	d__Bacteria	p__JAUVQV01	c__JAUVQV01	o__JAUVQV01	f__JAUVQV01	g__JAUWCW01	s__JAUWCW01 sp030609125
MetaBAT2_CS05_bin.55	188_1	d__Bacteria	p__JAUVQV01	c__JAUVQV01	o__JAUVQV01	f__JAUVQV01	g__JAUWCW01	s__JAUWCW01 sp030609125
SemiBin2_CS05_SemiBin.25	188_1	d__Bacteria	p__JAUVQV01	c__JAUVQV01	o__JAUVQV01	f__JAUVQV01	g__JAUWCW01	s__JAUWCW01 sp030609125
VAMB_CS05_bin.19000	188_1	d__Bacteria	p__JAUVQV01	c__JAUVQV01	o__JAUVQV01	f__JAUVQV01	g__JAUWCW01	s__JAUWCW01 sp030609125
CONCOCT_CS08_bin.238	189_1	d__Bacteria	p__JAUVQV01	c__JAUVQV01	o__JAUVQV01	f__JAUVQV01	g__	s__
ComeBin_CS08_bin.100371	189_1	d__Bacteria	p__JAUVQV01	c__JAUVQV01	o__JAUVQV01	f__JAUVQV01	g__	s__
CompleteBin_CS08.183	189_1	d__Bacteria	p__JAUVQV01	c__JAUVQV01	o__JAUVQV01	f__JAUVQV01	g__	s__
CONCOCT_CS05_bin.56	189_2	d__Bacteria	p__JAUVQV01	c__JAUVQV01	o__JAUVQV01	f__JAUVQV01	g__JAUWCW01	s__
ComeBin_CS05_bin.48628	189_2	d__Bacteria	p__JAUVQV01	c__JAUVQV01	o__JAUVQV01	f__JAUVQV01	g__JAUWCW01	s__
CompleteBin_CS05.161	189_2	d__Bacteria	p__JAUVQV01	c__JAUVQV01	o__JAUVQV01	f__JAUVQV01	g__JAUWCW01	s__
CompleteBin_CS05.162	189_2	d__Bacteria	p__JAUVQV01	c__JAUVQV01	o__JAUVQV01	f__JAUVQV01	g__JAUWCW01	s__
CONCOCT_CS01_bin.122	19_1	d__Bacteria	p__Chloroflexota	c__Anaerolineae	o__B4-G1	f__B4-G1	g__BS750m-G37	s__
ComeBin_CS01_bin.245739	19_1	d__Bacteria	p__Chloroflexota	c__Anaerolineae	o__B4-G1	f__B4-G1	g__BS750m-G37	s__
CompleteBin_CS01.861	19_1	d__Bacteria	p__Chloroflexota	c__Anaerolineae	o__B4-G1	f__B4-G1	g__BS750m-G37	s__
CONCOCT_CS03_bin.191	19_2	d__Bacteria	p__Chloroflexota	c__Anaerolineae	o__B4-G1	f__B4-G1	g__BS750m-G37	s__
ComeBin_CS03_bin.38108	19_2	d__Bacteria	p__Chloroflexota	c__Anaerolineae	o__B4-G1	f__B4-G1	g__BS750m-G37	s__
CompleteBin_CS03.70	19_2	d__Bacteria	p__Chloroflexota	c__Anaerolineae	o__B4-G1	f__B4-G1	g__BS750m-G37	s__
MetaBAT2_CS03_bin.81	19_2	d__Bacteria	p__Chloroflexota	c__Anaerolineae	o__B4-G1	f__B4-G1	g__BS750m-G37	s__
SemiBin2_CS03_SemiBin.137	19_2	d__Bacteria	p__Chloroflexota	c__Anaerolineae	o__B4-G1	f__B4-G1	g__BS750m-G37	s__
VAMB_CS03_bin.24378	19_2	d__Bacteria	p__Chloroflexota	c__Anaerolineae	o__B4-G1	f__B4-G1	g__BS750m-G37	s__
CONCOCT_CS01_bin.261	190_1	d__Bacteria	p__Spirochaetota	c__Spirochaetia	o__Spirochaetales_E	f__Spirochaetaceae_B	g__UBA2779	s__UBA2779 sp030592625
ComeBin_CS01_bin.129538	190_1	d__Bacteria	p__Spirochaetota	c__Spirochaetia	o__Spirochaetales_E	f__Spirochaetaceae_B	g__UBA2779	s__UBA2779 sp030592625
CompleteBin_CS01.534	190_1	d__Bacteria	p__Spirochaetota	c__Spirochaetia	o__Spirochaetales_E	f__Spirochaetaceae_B	g__UBA2779	s__UBA2779 sp030592625
ComeBin_CS05_bin.130608	191_1	d__Bacteria	p__Desulfobacterota	c__Desulfuromonadia	o__Desulfuromonadales	f__Trichloromonadaceae	g__Trichloromonas	s__
CompleteBin_CS05.356	191_1	d__Bacteria	p__Desulfobacterota	c__Desulfuromonadia	o__Desulfuromonadales	f__Trichloromonadaceae	g__Trichloromonas	s__
ComeBin_CS01_bin.164218	192_1	d__Bacteria	p__Fermentibacterota	c__Fermentibacteria	o__Fermentibacterales	f__Fermentibacteraceae	g__Aegiribacteria	s__Aegiribacteria sp030600545
CompleteBin_CS03.456	192_2	d__Bacteria	p__Fermentibacterota	c__Fermentibacteria	o__Fermentibacterales	f__Fermentibacteraceae	g__Aegiribacteria	s__
CONCOCT_CS08_bin.157	193_1	d__Bacteria	p__Fermentibacterota	c__Fermentibacteria	o__Fermentibacterales	f__Fermentibacteraceae	g__Aegiribacteria	s__
ComeBin_CS08_bin.185045	193_1	d__Bacteria	p__Fermentibacterota	c__Fermentibacteria	o__Fermentibacterales	f__Fermentibacteraceae	g__Aegiribacteria	s__
CompleteBin_CS08.324	193_1	d__Bacteria	p__Fermentibacterota	c__Fermentibacteria	o__Fermentibacterales	f__Fermentibacteraceae	g__Aegiribacteria	s__
CONCOCT_CS01_bin.21	193_2	d__Bacteria	p__Fermentibacterota	c__Fermentibacteria	o__Fermentibacterales	f__Fermentibacteraceae	g__Aegiribacteria	s__Aegiribacteria sp030594645
ComeBin_CS01_bin.3827	193_2	d__Bacteria	p__Fermentibacterota	c__Fermentibacteria	o__Fermentibacterales	f__Fermentibacteraceae	g__Aegiribacteria	s__Aegiribacteria sp030594645
CompleteBin_CS01.422	193_2	d__Bacteria	p__Fermentibacterota	c__Fermentibacteria	o__Fermentibacterales	f__Fermentibacteraceae	g__Aegiribacteria	s__Aegiribacteria sp030594645
MetaBAT2_CS01_bin.95	193_2	d__Bacteria	p__Fermentibacterota	c__Fermentibacteria	o__Fermentibacterales	f__Fermentibacteraceae	g__Aegiribacteria	s__Aegiribacteria sp030594645
SemiBin2_CS01_SemiBin.24	193_2	d__Bacteria	p__Fermentibacterota	c__Fermentibacteria	o__Fermentibacterales	f__Fermentibacteraceae	g__Aegiribacteria	s__Aegiribacteria sp030594645
VAMB_CS01_bin.19922	193_2	d__Bacteria	p__Fermentibacterota	c__Fermentibacteria	o__Fermentibacterales	f__Fermentibacteraceae	g__Aegiribacteria	s__Aegiribacteria sp030594645
CONCOCT_CS12_bin.293	194_1	d__Bacteria	p__Fermentibacterota	c__Fermentibacteria	o__Fermentibacterales	f__Fermentibacteraceae	g__Aegiribacteria	s__
ComeBin_CS12_bin.21015	194_1	d__Bacteria	p__Fermentibacterota	c__Fermentibacteria	o__Fermentibacterales	f__Fermentibacteraceae	g__Aegiribacteria	s__
CompleteBin_CS12.19	194_1	d__Bacteria	p__Fermentibacterota	c__Fermentibacteria	o__Fermentibacterales	f__Fermentibacteraceae	g__Aegiribacteria	s__
MetaBAT2_CS12_bin.151	194_1	d__Bacteria	p__Fermentibacterota	c__Fermentibacteria	o__Fermentibacterales	f__Fermentibacteraceae	g__Aegiribacteria	s__
SemiBin2_CS12_SemiBin.88	194_1	d__Bacteria	p__Fermentibacterota	c__Fermentibacteria	o__Fermentibacterales	f__Fermentibacteraceae	g__Aegiribacteria	s__
VAMB_CS12_bin.15475	194_1	d__Bacteria	p__Fermentibacterota	c__Fermentibacteria	o__Fermentibacterales	f__Fermentibacteraceae	g__Aegiribacteria	s__
CONCOCT_CS10_bin.108	195_1	d__Bacteria	p__Fermentibacterota	c__Fermentibacteria	o__Fermentibacterales	f__Fermentibacteraceae	g__Aegiribacteria	s__Aegiribacteria sp030592645
ComeBin_CS10_bin.202503	195_1	d__Bacteria	p__Fermentibacterota	c__Fermentibacteria	o__Fermentibacterales	f__Fermentibacteraceae	g__Aegiribacteria	s__Aegiribacteria sp030592645
CompleteBin_CS10.8	195_1	d__Bacteria	p__Fermentibacterota	c__Fermentibacteria	o__Fermentibacterales	f__Fermentibacteraceae	g__Aegiribacteria	s__Aegiribacteria sp030592645
CONCOCT_CS12_bin.279	195_2	d__Bacteria	p__Fermentibacterota	c__Fermentibacteria	o__Fermentibacterales	f__Fermentibacteraceae	g__Aegiribacteria	s__Aegiribacteria sp030592645
ComeBin_CS12_bin.89901	195_2	d__Bacteria	p__Fermentibacterota	c__Fermentibacteria	o__Fermentibacterales	f__Fermentibacteraceae	g__Aegiribacteria	s__Aegiribacteria sp030592645
CompleteBin_CS12.201	195_2	d__Bacteria	p__Fermentibacterota	c__Fermentibacteria	o__Fermentibacterales	f__Fermentibacteraceae	g__Aegiribacteria	s__Aegiribacteria sp030592645
MetaBAT2_CS12_bin.91	195_2	d__Bacteria	p__Fermentibacterota	c__Fermentibacteria	o__Fermentibacterales	f__Fermentibacteraceae	g__Aegiribacteria	s__Aegiribacteria sp030592645
SemiBin2_CS12_SemiBin.274	195_2	d__Bacteria	p__Fermentibacterota	c__Fermentibacteria	o__Fermentibacterales	f__Fermentibacteraceae	g__Aegiribacteria	s__Aegiribacteria sp030592645
VAMB_CS12_bin.16890	195_2	d__Bacteria	p__Fermentibacterota	c__Fermentibacteria	o__Fermentibacterales	f__Fermentibacteraceae	g__Aegiribacteria	s__Aegiribacteria sp030592645
ComeBin_CS01_bin.205840	196_0	d__Bacteria	p__Fermentibacterota	c__Fermentibacteria	o__Fermentibacterales	f__Fermentibacteraceae	g__Aegiribacteria	s__
ComeBin_CS08_bin.248644	197_1	d__Bacteria	p__Chloroflexota	c__Anaerolineae	o__J102	f__J102	g__DUEF01	s__
CompleteBin_CS08.243	197_1	d__Bacteria	p__Chloroflexota	c__Anaerolineae	o__J102	f__J102	g__DUEF01	s__
CONCOCT_CS01_bin.103	197_2	d__Bacteria	p__Chloroflexota	c__Anaerolineae	o__J102	f__J102	g__DUEF01	s__
ComeBin_CS01_bin.143691	197_2	d__Bacteria	p__Chloroflexota	c__Anaerolineae	o__J102	f__J102	g__DUEF01	s__
CompleteBin_CS01.39	197_2	d__Bacteria	p__Chloroflexota	c__Anaerolineae	o__J102	f__J102	g__DUEF01	s__
CompleteBin_CS01.392	197_2	d__Bacteria	p__Chloroflexota	c__Anaerolineae	o__J102	f__J102	g__DUEF01	s__
CONCOCT_CS10_bin.198	197_3	d__Bacteria	p__Chloroflexota	c__Anaerolineae	o__J102	f__J102	g__DUEF01	s__
ComeBin_CS10_bin.5589	197_3	d__Bacteria	p__Chloroflexota	c__Anaerolineae	o__J102	f__J102	g__DUEF01	s__
CompleteBin_CS10.646	197_3	d__Bacteria	p__Chloroflexota	c__Anaerolineae	o__J102	f__J102	g__DUEF01	s__
MetaBAT2_CS10_bin.105	197_3	d__Bacteria	p__Chloroflexota	c__Anaerolineae	o__J102	f__J102	g__DUEF01	s__
SemiBin2_CS10_SemiBin.16	197_3	d__Bacteria	p__Chloroflexota	c__Anaerolineae	o__J102	f__J102	g__DUEF01	s__
VAMB_CS10_bin.18197	197_3	d__Bacteria	p__Chloroflexota	c__Anaerolineae	o__J102	f__J102	g__DUEF01	s__
CONCOCT_CS01_bin.173	198_1	d__Bacteria	p__Chloroflexota	c__Anaerolineae	o__Promineifilales	f__Promineifilaceae	g__JAACFF01	s__
ComeBin_CS01_bin.16183	198_1	d__Bacteria	p__Chloroflexota	c__Anaerolineae	o__Promineifilales	f__Promineifilaceae	g__JAACFF01	s__
CompleteBin_CS01.878	198_1	d__Bacteria	p__Chloroflexota	c__Anaerolineae	o__Promineifilales	f__Promineifilaceae	g__JAACFF01	s__
MetaBAT2_CS01_bin.57	198_1	d__Bacteria	p__Chloroflexota	c__Anaerolineae	o__Promineifilales	f__Promineifilaceae	g__JAACFF01	s__
SemiBin2_CS01_SemiBin.79	198_1	d__Bacteria	p__Chloroflexota	c__Anaerolineae	o__Promineifilales	f__Promineifilaceae	g__JAACFF01	s__
VAMB_CS01_bin.14646	198_1	d__Bacteria	p__Chloroflexota	c__Anaerolineae	o__Promineifilales	f__Promineifilaceae	g__JAACFF01	s__
CONCOCT_CS08_bin.53	198_2	d__Bacteria	p__Chloroflexota	c__Anaerolineae	o__Promineifilales	f__Promineifilaceae	g__JAACFF01	s__
ComeBin_CS08_bin.260907	198_2	d__Bacteria	p__Chloroflexota	c__Anaerolineae	o__Promineifilales	f__Promineifilaceae	g__JAACFF01	s__
CompleteBin_CS08.141	198_2	d__Bacteria	p__Chloroflexota	c__Anaerolineae	o__Promineifilales	f__Promineifilaceae	g__JAACFF01	s__
CompleteBin_CS10.517	198_3	d__Bacteria	p__Chloroflexota	c__Anaerolineae	o__Promineifilales	f__Promineifilaceae	g__JAACFF01	s__
CompleteBin_CS10.857	198_3	d__Bacteria	p__Chloroflexota	c__Anaerolineae	o__Promineifilales	f__Promineifilaceae	g__JAACFF01	s__
CONCOCT_CS08_bin.261	199_1	d__Bacteria	p__Gemmatimonadota	c__Gemmatimonadetes	o__Gemmatimonadales	f__GWC2-71-9	g__	s__
CompleteBin_CS08.457	199_1	d__Bacteria	p__Gemmatimonadota	c__Gemmatimonadetes	o__Gemmatimonadales	f__GWC2-71-9	g__	s__
ComeBin_CS10_bin.208017	199_2	d__Bacteria	p__Gemmatimonadota	c__Gemmatimonadetes	o__Gemmatimonadales	f__GWC2-71-9	g__	s__
CompleteBin_CS10.992	199_2	d__Bacteria	p__Gemmatimonadota	c__Gemmatimonadetes	o__Gemmatimonadales	f__GWC2-71-9	g__	s__
ComeBin_CS01_bin.184292	2_1	d__Bacteria	p__Actinomycetota	c__Humimicrobiia	o__Humimicrobiales	f__Humimicrobiaceae	g__M55B120	s__
CompleteBin_CS01.665	2_1	d__Bacteria	p__Actinomycetota	c__Humimicrobiia	o__Humimicrobiales	f__Humimicrobiaceae	g__M55B120	s__
ComeBin_CS08_bin.216583	20_1	d__Bacteria	p__Chloroflexota	c__Anaerolineae	o__B4-G1	f__B4-G1	g__JAAEPW01	s__
CompleteBin_CS08.273	20_1	d__Bacteria	p__Chloroflexota	c__Anaerolineae	o__B4-G1	f__B4-G1	g__JAAEPW01	s__
CompleteBin_CS08.274	20_2	d__Bacteria	p__Chloroflexota	c__Anaerolineae	o__B4-G1	f__B4-G1	g__BS750m-G37	s__
CompleteBin_CS08.275	20_2	d__Bacteria	p__Chloroflexota	c__Anaerolineae	o__B4-G1	f__B4-G1	g__BS750m-G37	s__
CONCOCT_CS12_bin.269	200_1	d__Bacteria	p__Bipolaricaulota	c__Bipolaricaulia	o__UBA7950	f__UBA9294	g__JAUWNS01	s__
ComeBin_CS12_bin.206406	200_1	d__Bacteria	p__Bipolaricaulota	c__Bipolaricaulia	o__UBA7950	f__UBA9294	g__JAUWNS01	s__
CompleteBin_CS12.551	200_1	d__Bacteria	p__Bipolaricaulota	c__Bipolaricaulia	o__UBA7950	f__UBA9294	g__JAUWNS01	s__
VAMB_CS12_bin.34516	200_1	d__Bacteria	p__Bipolaricaulota	c__Bipolaricaulia	o__UBA7950	f__UBA9294	g__JAUWNS01	s__
CONCOCT_CS01_bin.248	200_2	d__Bacteria	p__Bipolaricaulota	c__Bipolaricaulia	o__UBA7950	f__UBA9294	g__JAUWNS01	s__
ComeBin_CS01_bin.187329	200_2	d__Bacteria	p__Bipolaricaulota	c__Bipolaricaulia	o__UBA7950	f__UBA9294	g__JAUWNS01	s__
CompleteBin_CS01.637	200_2	d__Bacteria	p__Bipolaricaulota	c__Bipolaricaulia	o__UBA7950	f__UBA9294	g__JAUWNS01	s__
CompleteBin_CS01.638	200_2	d__Bacteria	p__Bipolaricaulota	c__Bipolaricaulia	o__UBA7950	f__UBA9294	g__JAUWNS01	s__
CONCOCT_CS03_bin.84	200_3	d__Bacteria	p__Bipolaricaulota	c__Bipolaricaulia	o__UBA7950	f__UBA9294	g__JAUWNS01	s__
ComeBin_CS03_bin.60222	200_3	d__Bacteria	p__Bipolaricaulota	c__Bipolaricaulia	o__UBA7950	f__UBA9294	g__JAUWNS01	s__
CompleteBin_CS03.146	200_3	d__Bacteria	p__Bipolaricaulota	c__Bipolaricaulia	o__UBA7950	f__UBA9294	g__JAUWNS01	s__
MetaBAT2_CS03_bin.71	200_3	d__Bacteria	p__Bipolaricaulota	c__Bipolaricaulia	o__UBA7950	f__UBA9294	g__JAUWNS01	s__
SemiBin2_CS03_SemiBin.197	200_3	d__Bacteria	p__Bipolaricaulota	c__Bipolaricaulia	o__UBA7950	f__UBA9294	g__JAUWNS01	s__
VAMB_CS03_bin.15241	200_3	d__Bacteria	p__Bipolaricaulota	c__Bipolaricaulia	o__UBA7950	f__UBA9294	g__JAUWNS01	s__
ComeBin_CS03_bin.2182	201_1	d__Bacteria	p__Bipolaricaulota	c__Bipolaricaulia	o__UBA7950	f__UBA9294	g__JAUVYF01	s__JAUVYF01 sp030603215
CompleteBin_CS03.120	201_1	d__Bacteria	p__Bipolaricaulota	c__Bipolaricaulia	o__UBA7950	f__UBA9294	g__JAUVYF01	s__JAUVYF01 sp030603215
MetaBAT2_CS03_bin.39	201_1	d__Bacteria	p__Bipolaricaulota	c__Bipolaricaulia	o__UBA7950	f__UBA9294	g__JAUVYF01	s__JAUVYF01 sp030603215
SemiBin2_CS03_SemiBin.20	201_1	d__Bacteria	p__Bipolaricaulota	c__Bipolaricaulia	o__UBA7950	f__UBA9294	g__JAUVYF01	s__JAUVYF01 sp030603215
VAMB_CS03_bin.62782	201_1	d__Bacteria	p__Bipolaricaulota	c__Bipolaricaulia	o__UBA7950	f__UBA9294	g__JAUVYF01	s__JAUVYF01 sp030603215
ComeBin_CS03_bin.1805	202_1	d__Bacteria	p__Bipolaricaulota	c__Bipolaricaulia	o__UBA7950	f__UBA9294	g__UBA9294	s__
CompleteBin_CS03.113	202_1	d__Bacteria	p__Bipolaricaulota	c__Bipolaricaulia	o__UBA7950	f__UBA9294	g__UBA9294	s__
CompleteBin_CS03.481	202_1	d__Bacteria	p__Bipolaricaulota	c__Bipolaricaulia	o__UBA7950	f__UBA9294	g__UBA9294	s__
MetaBAT2_CS03_bin.96	202_1	d__Bacteria	p__Bipolaricaulota	c__Bipolaricaulia	o__UBA7950	f__UBA9294	g__UBA9294	s__
SemiBin2_CS03_SemiBin.5	202_1	d__Bacteria	p__Bipolaricaulota	c__Bipolaricaulia	o__UBA7950	f__UBA9294	g__UBA9294	s__
VAMB_CS03_bin.78580	202_1	d__Bacteria	p__Bipolaricaulota	c__Bipolaricaulia	o__UBA7950	f__UBA9294	g__UBA9294	s__
CONCOCT_CS03_bin.109	203_1	d__Bacteria	p__Krumholzibacteriota	c__Krumholzibacteria	o__Krumholzibacteriales	f__Krumholzibacteriaceae	g__DAOUUU01	s__
ComeBin_CS03_bin.92077	203_1	d__Bacteria	p__Krumholzibacteriota	c__Krumholzibacteria	o__Krumholzibacteriales	f__Krumholzibacteriaceae	g__DAOUUU01	s__
CompleteBin_CS03.252	203_1	d__Bacteria	p__Krumholzibacteriota	c__Krumholzibacteria	o__Krumholzibacteriales	f__Krumholzibacteriaceae	g__DAOUUU01	s__
MetaBAT2_CS03_bin.60	203_1	d__Bacteria	p__Krumholzibacteriota	c__Krumholzibacteria	o__Krumholzibacteriales	f__Krumholzibacteriaceae	g__DAOUUU01	s__
SemiBin2_CS03_SemiBin.268	203_1	d__Bacteria	p__Krumholzibacteriota	c__Krumholzibacteria	o__Krumholzibacteriales	f__Krumholzibacteriaceae	g__DAOUUU01	s__
ComeBin_CS03_bin.86693	204_1	d__Bacteria	p__Krumholzibacteriota	c__Krumholzibacteria	o__Krumholzibacteriales	f__Krumholzibacteriaceae	g__JAUWCL01	s__
CompleteBin_CS03.237	204_1	d__Bacteria	p__Krumholzibacteriota	c__Krumholzibacteria	o__Krumholzibacteriales	f__Krumholzibacteriaceae	g__JAUWCL01	s__
CONCOCT_CS08_bin.249	204_2	d__Bacteria	p__Krumholzibacteriota	c__Krumholzibacteria	o__Krumholzibacteriales	f__Krumholzibacteriaceae	g__JAUWCL01	s__
ComeBin_CS08_bin.81236	204_2	d__Bacteria	p__Krumholzibacteriota	c__Krumholzibacteria	o__Krumholzibacteriales	f__Krumholzibacteriaceae	g__JAUWCL01	s__
CompleteBin_CS08.148	204_2	d__Bacteria	p__Krumholzibacteriota	c__Krumholzibacteria	o__Krumholzibacteriales	f__Krumholzibacteriaceae	g__JAUWCL01	s__
MetaBAT2_CS08_bin.86	204_2	d__Bacteria	p__Krumholzibacteriota	c__Krumholzibacteria	o__Krumholzibacteriales	f__Krumholzibacteriaceae	g__JAUWCL01	s__
VAMB_CS08_bin.16107	204_2	d__Bacteria	p__Krumholzibacteriota	c__Krumholzibacteria	o__Krumholzibacteriales	f__Krumholzibacteriaceae	g__JAUWCL01	s__
CONCOCT_CS01_bin.11	205_1	d__Bacteria	p__Krumholzibacteriota	c__Krumholzibacteria	o__Krumholzibacteriales	f__Krumholzibacteriaceae	g__JAUWCL01	s__
ComeBin_CS01_bin.2900	205_1	d__Bacteria	p__Krumholzibacteriota	c__Krumholzibacteria	o__Krumholzibacteriales	f__Krumholzibacteriaceae	g__JAUWCL01	s__
CompleteBin_CS01.404	205_1	d__Bacteria	p__Krumholzibacteriota	c__Krumholzibacteria	o__Krumholzibacteriales	f__Krumholzibacteriaceae	g__JAUWCL01	s__
MetaBAT2_CS01_bin.23	205_1	d__Bacteria	p__Krumholzibacteriota	c__Krumholzibacteria	o__Krumholzibacteriales	f__Krumholzibacteriaceae	g__JAUWCL01	s__
SemiBin2_CS01_SemiBin.22	205_1	d__Bacteria	p__Krumholzibacteriota	c__Krumholzibacteria	o__Krumholzibacteriales	f__Krumholzibacteriaceae	g__JAUWCL01	s__
VAMB_CS01_bin.17236	205_1	d__Bacteria	p__Krumholzibacteriota	c__Krumholzibacteria	o__Krumholzibacteriales	f__Krumholzibacteriaceae	g__JAUWCL01	s__
ComeBin_CS10_bin.299086	206_1	d__Bacteria	p__Krumholzibacteriota	c__Krumholzibacteria	o__Krumholzibacteriales	f__Krumholzibacteriaceae	g__JAUWCL01	s__
CompleteBin_CS10.164	206_1	d__Bacteria	p__Krumholzibacteriota	c__Krumholzibacteria	o__Krumholzibacteriales	f__Krumholzibacteriaceae	g__JAUWCL01	s__
ComeBin_CS10_bin.7703	207_1	d__Bacteria	p__Patescibacteria	c__Gracilibacteria	o__UBA1369	f__PNNO01	g__JAUVDZ01	s__
CompleteBin_CS10.328	207_1	d__Bacteria	p__Patescibacteria	c__Gracilibacteria	o__UBA1369	f__PNNO01	g__JAUVDZ01	s__
CompleteBin_CS10.821	207_1	d__Bacteria	p__Patescibacteria	c__Gracilibacteria	o__UBA1369	f__PNNO01	g__JAUVDZ01	s__
MetaBAT2_CS10_bin.8	207_1	d__Bacteria	p__Patescibacteria	c__Gracilibacteria	o__UBA1369	f__PNNO01	g__JAUVDZ01	s__
SemiBin2_CS10_SemiBin.29	207_1	d__Bacteria	p__Patescibacteria	c__Gracilibacteria	o__UBA1369	f__PNNO01	g__JAUVDZ01	s__
VAMB_CS10_bin.21696	207_1	d__Bacteria	p__Patescibacteria	c__Gracilibacteria	o__UBA1369	f__PNNO01	g__JAUVDZ01	s__
CompleteBin_CS12.711	207_2	d__Bacteria	p__Patescibacteria	c__Gracilibacteria	o__UBA1369	f__PNNO01	g__	s__
ComeBin_CS03_bin.6099	208_1	d__Bacteria	p__Omnitrophota	c__Koll11	o__Duberdicusellales	f__4484-171	g__Susulua	s__
CompleteBin_CS03.27	208_1	d__Bacteria	p__Omnitrophota	c__Koll11	o__Duberdicusellales	f__4484-171	g__Susulua	s__
CompleteBin_CS03.295	208_1	d__Bacteria	p__Omnitrophota	c__Koll11	o__Duberdicusellales	f__4484-171	g__Susulua	s__
MetaBAT2_CS03_bin.68	208_1	d__Bacteria	p__Omnitrophota	c__Koll11	o__Duberdicusellales	f__4484-171	g__Susulua	s__
SemiBin2_CS03_SemiBin.40	208_1	d__Bacteria	p__Omnitrophota	c__Koll11	o__Duberdicusellales	f__4484-171	g__Susulua	s__
VAMB_CS03_bin.16828	208_1	d__Bacteria	p__Omnitrophota	c__Koll11	o__Duberdicusellales	f__4484-171	g__Susulua	s__
ComeBin_CS01_bin.182646	209_1	d__Bacteria	p__Omnitrophota	c__Koll11	o__Duberdicusellales	f__4484-171	g__Susulua	s__
CompleteBin_CS01.767	209_1	d__Bacteria	p__Omnitrophota	c__Koll11	o__Duberdicusellales	f__4484-171	g__Susulua	s__
ComeBin_CS01_bin.109455	21_1	d__Bacteria	p__Chloroflexota	c__Anaerolineae	o__Promineifilales	f__UBA4811	g__GLR113	s__GLR113 sp013139935
CompleteBin_CS01.488	21_1	d__Bacteria	p__Chloroflexota	c__Anaerolineae	o__Promineifilales	f__UBA4811	g__GLR113	s__GLR113 sp013139935
MetaBAT2_CS01_bin.115	21_1	d__Bacteria	p__Chloroflexota	c__Anaerolineae	o__Promineifilales	f__UBA4811	g__GLR113	s__GLR113 sp013139935
VAMB_CS01_bin.19054	21_1	d__Bacteria	p__Chloroflexota	c__Anaerolineae	o__Promineifilales	f__UBA4811	g__GLR113	s__GLR113 sp013139935
CONCOCT_CS03_bin.232	21_2	d__Bacteria	p__Chloroflexota	c__Anaerolineae	o__Promineifilales	f__UBA4811	g__GLR113	s__GLR113 sp013139935
ComeBin_CS03_bin.135461	21_2	d__Bacteria	p__Chloroflexota	c__Anaerolineae	o__Promineifilales	f__UBA4811	g__GLR113	s__GLR113 sp013139935
CompleteBin_CS03.380	21_2	d__Bacteria	p__Chloroflexota	c__Anaerolineae	o__Promineifilales	f__UBA4811	g__GLR113	s__GLR113 sp013139935
VAMB_CS03_bin.14601	21_2	d__Bacteria	p__Chloroflexota	c__Anaerolineae	o__Promineifilales	f__UBA4811	g__GLR113	s__GLR113 sp013139935
ComeBin_CS12_bin.15342	21_3	d__Bacteria	p__Chloroflexota	c__Anaerolineae	o__Promineifilales	f__UBA4811	g__GLR113	s__GLR113 sp013139935
CompleteBin_CS12.459	21_3	d__Bacteria	p__Chloroflexota	c__Anaerolineae	o__Promineifilales	f__UBA4811	g__GLR113	s__GLR113 sp013139935
CompleteBin_CS12.610	21_3	d__Bacteria	p__Chloroflexota	c__Anaerolineae	o__Promineifilales	f__UBA4811	g__GLR113	s__GLR113 sp013139935
CompleteBin_CS12.720	21_3	d__Bacteria	p__Chloroflexota	c__Anaerolineae	o__Promineifilales	f__UBA4811	g__GLR113	s__GLR113 sp013139935
SemiBin2_CS12_SemiBin.73	21_3	d__Bacteria	p__Chloroflexota	c__Anaerolineae	o__Promineifilales	f__UBA4811	g__GLR113	s__GLR113 sp013139935
VAMB_CS12_bin.13480	21_3	d__Bacteria	p__Chloroflexota	c__Anaerolineae	o__Promineifilales	f__UBA4811	g__GLR113	s__GLR113 sp013139935
CONCOCT_CS05_bin.162	210_1	d__Bacteria	p__Campylobacterota	c__Campylobacteria	o__Campylobacterales	f__Sulfurimonadaceae	g__S145-25	s__S145-25 sp030613795
ComeBin_CS05_bin.26490	210_1	d__Bacteria	p__Campylobacterota	c__Campylobacteria	o__Campylobacterales	f__Sulfurimonadaceae	g__S145-25	s__S145-25 sp030613795
CompleteBin_CS05.111	210_1	d__Bacteria	p__Campylobacterota	c__Campylobacteria	o__Campylobacterales	f__Sulfurimonadaceae	g__S145-25	s__S145-25 sp030613795
MetaBAT2_CS05_bin.52	210_1	d__Bacteria	p__Campylobacterota	c__Campylobacteria	o__Campylobacterales	f__Sulfurimonadaceae	g__S145-25	s__S145-25 sp030613795
VAMB_CS05_bin.24338	210_1	d__Bacteria	p__Campylobacterota	c__Campylobacteria	o__Campylobacterales	f__Sulfurimonadaceae	g__S145-25	s__S145-25 sp030613795
CONCOCT_CS01_bin.112	211_1	d__Bacteria	p__Campylobacterota	c__Campylobacteria	o__Campylobacterales	f__Sulfurimonadaceae	g__S145-25	s__S145-25 sp030596305
ComeBin_CS01_bin.133324	211_1	d__Bacteria	p__Campylobacterota	c__Campylobacteria	o__Campylobacterales	f__Sulfurimonadaceae	g__S145-25	s__S145-25 sp030596305
CompleteBin_CS01.544	211_1	d__Bacteria	p__Campylobacterota	c__Campylobacteria	o__Campylobacterales	f__Sulfurimonadaceae	g__S145-25	s__S145-25 sp030596305
CONCOCT_CS08_bin.26	212_1	d__Bacteria	p__Campylobacterota	c__Campylobacteria	o__Campylobacterales	f__Sulfurimonadaceae	g__S145-25	s__
ComeBin_CS08_bin.141217	212_1	d__Bacteria	p__Campylobacterota	c__Campylobacteria	o__Campylobacterales	f__Sulfurimonadaceae	g__S145-25	s__
CompleteBin_CS08.250	212_1	d__Bacteria	p__Campylobacterota	c__Campylobacteria	o__Campylobacterales	f__Sulfurimonadaceae	g__S145-25	s__
MetaBAT2_CS08_bin.36	212_1	d__Bacteria	p__Campylobacterota	c__Campylobacteria	o__Campylobacterales	f__Sulfurimonadaceae	g__S145-25	s__
VAMB_CS08_bin.16319	212_1	d__Bacteria	p__Campylobacterota	c__Campylobacteria	o__Campylobacterales	f__Sulfurimonadaceae	g__S145-25	s__
CONCOCT_CS03_bin.136	212_2	d__Bacteria	p__Campylobacterota	c__Campylobacteria	o__Campylobacterales	f__Sulfurimonadaceae	g__S145-25	s__
ComeBin_CS03_bin.139185	212_2	d__Bacteria	p__Campylobacterota	c__Campylobacteria	o__Campylobacterales	f__Sulfurimonadaceae	g__S145-25	s__
CompleteBin_CS03.5	212_2	d__Bacteria	p__Campylobacterota	c__Campylobacteria	o__Campylobacterales	f__Sulfurimonadaceae	g__S145-25	s__
MetaBAT2_CS03_bin.74	212_2	d__Bacteria	p__Campylobacterota	c__Campylobacteria	o__Campylobacterales	f__Sulfurimonadaceae	g__S145-25	s__
VAMB_CS03_bin.14138	212_2	d__Bacteria	p__Campylobacterota	c__Campylobacteria	o__Campylobacterales	f__Sulfurimonadaceae	g__S145-25	s__
CONCOCT_CS05_bin.121	212_3	d__Bacteria	p__Campylobacterota	c__Campylobacteria	o__Campylobacterales	f__Sulfurimonadaceae	g__S145-25	s__
ComeBin_CS05_bin.57764	212_3	d__Bacteria	p__Campylobacterota	c__Campylobacteria	o__Campylobacterales	f__Sulfurimonadaceae	g__S145-25	s__
CompleteBin_CS05.110	212_3	d__Bacteria	p__Campylobacterota	c__Campylobacteria	o__Campylobacterales	f__Sulfurimonadaceae	g__S145-25	s__
MetaBAT2_CS05_bin.88	212_3	d__Bacteria	p__Campylobacterota	c__Campylobacteria	o__Campylobacterales	f__Sulfurimonadaceae	g__S145-25	s__
CompleteBin_CS10.1350	212_4	d__Bacteria	p__Campylobacterota	c__Campylobacteria	o__Campylobacterales	f__Sulfurimonadaceae	g__S145-25	s__
CONCOCT_CS03_bin.122	213_1	d__Bacteria	p__Campylobacterota	c__Campylobacteria	o__Campylobacterales	f__Sulfurovaceae	g__Sulfurovum	s__
CompleteBin_CS03.269	213_1	d__Bacteria	p__Campylobacterota	c__Campylobacteria	o__Campylobacterales	f__Sulfurovaceae	g__Sulfurovum	s__
CompleteBin_CS01.741	213_2	d__Bacteria	p__Campylobacterota	c__Campylobacteria	o__Campylobacterales	f__Sulfurovaceae	g__Sulfurovum	s__
ComeBin_CS12_bin.113601	213_3	d__Bacteria	p__Campylobacterota	c__Campylobacteria	o__Campylobacterales	f__Sulfurovaceae	g__Sulfurovum	s__
ComeBin_CS03_bin.157484	214_0	d__Bacteria	p__Campylobacterota	c__Campylobacteria	o__Campylobacterales	f__Sulfurovaceae	g__Sulfurovum	s__
CompleteBin_CS05.261	215_0	d__Bacteria	p__Campylobacterota	c__Campylobacteria	o__Campylobacterales	f__Sulfurovaceae	g__Sulfurovum	s__
ComeBin_CS08_bin.22631	216_1	d__Bacteria	p__Campylobacterota	c__Campylobacteria	o__Campylobacterales	f__Sulfurovaceae	g__Sulfurovum	s__
CompleteBin_CS08.649	216_1	d__Bacteria	p__Campylobacterota	c__Campylobacteria	o__Campylobacterales	f__Sulfurovaceae	g__Sulfurovum	s__
MetaBAT2_CS08_bin.81	216_1	d__Bacteria	p__Campylobacterota	c__Campylobacteria	o__Campylobacterales	f__Sulfurovaceae	g__Sulfurovum	s__
CompleteBin_CS12.411	217_1	d__Bacteria	p__Campylobacterota	c__Campylobacteria	o__Campylobacterales	f__Sulfurovaceae	g__Sulfurovum	s__
CompleteBin_CS12.412	217_1	d__Bacteria	p__Campylobacterota	c__Campylobacteria	o__Campylobacterales	f__Sulfurovaceae	g__Sulfurovum	s__
ComeBin_CS05_bin.159869	218_1	d__Bacteria	p__Campylobacterota	c__Campylobacteria	o__Campylobacterales	f__Sulfurovaceae	g__Sulfurovum	s__
CompleteBin_CS05.324	218_1	d__Bacteria	p__Campylobacterota	c__Campylobacteria	o__Campylobacterales	f__Sulfurovaceae	g__Sulfurovum	s__
VAMB_CS05_bin.21708	218_1	d__Bacteria	p__Campylobacterota	c__Campylobacteria	o__Campylobacterales	f__Sulfurovaceae	g__Sulfurovum	s__
CompleteBin_CS08.5	218_2	d__Bacteria	p__Campylobacterota	c__Campylobacteria	o__Campylobacterales	f__Sulfurovaceae	g__Sulfurovum	s__
CompleteBin_CS10.678	218_3	d__Bacteria	p__Campylobacterota	c__Campylobacteria	o__Campylobacterales	f__Sulfurovaceae	g__Sulfurovum	s__
CompleteBin_CS12.413	218_4	d__Bacteria	p__Campylobacterota	c__Campylobacteria	o__Campylobacterales	f__Sulfurovaceae	g__Sulfurovum	s__
CompleteBin_CS05.322	219_0	d__Bacteria	p__Campylobacterota	c__Campylobacteria	o__Campylobacterales	f__Sulfurovaceae	g__Sulfurovum	s__
CompleteBin_CS12.242	22_1	d__Bacteria	p__Chloroflexota	c__Anaerolineae	o__JAAYZQ01	f__JAAYZQ01	g__	s__
CompleteBin_CS12.286	22_1	d__Bacteria	p__Chloroflexota	c__Anaerolineae	o__JAAYZQ01	f__JAAYZQ01	g__	s__
CONCOCT_CS05_bin.108	22_2	d__Bacteria	p__Chloroflexota	c__Anaerolineae	o__JAAYZQ01	f__	g__	s__
CompleteBin_CS05.260	220_1	Unclassified Bacteria
CompleteBin_CS05.263	220_1	Unclassified Bacteria
CompleteBin_CS05.531	221_0	d__Bacteria	p__Fusobacteriota	c__Fusobacteriia	o__Fusobacteriales	f__Fusobacteriaceae	g__Psychrilyobacter	s__
CONCOCT_CS05_bin.50	222_1	d__Bacteria	p__Desulfobacterota	c__GWC2-55-46	o__S146-70	f__JAUXIU01	g__	s__
ComeBin_CS05_bin.30549	222_1	d__Bacteria	p__Desulfobacterota	c__GWC2-55-46	o__S146-70	f__JAUXIU01	g__	s__
CompleteBin_CS05.117	222_1	d__Bacteria	p__Desulfobacterota	c__GWC2-55-46	o__S146-70	f__JAUXIU01	g__	s__
MetaBAT2_CS05_bin.92	222_1	d__Bacteria	p__Desulfobacterota	c__GWC2-55-46	o__S146-70	f__JAUXIU01	g__	s__
SemiBin2_CS05_SemiBin.63	222_1	d__Bacteria	p__Desulfobacterota	c__GWC2-55-46	o__S146-70	f__JAUXIU01	g__	s__
VAMB_CS05_bin.34376	222_1	d__Bacteria	p__Desulfobacterota	c__GWC2-55-46	o__S146-70	f__JAUXIU01	g__	s__
CONCOCT_CS05_bin.78	223_1	d__Bacteria	p__Desulfobacterota	c__JADFVX01	o__JADFVX01	f__JADFVX01	g__JADFVX01	s__
ComeBin_CS05_bin.132888	223_1	d__Bacteria	p__Desulfobacterota	c__JADFVX01	o__JADFVX01	f__JADFVX01	g__JADFVX01	s__
CompleteBin_CS05.846	223_1	d__Bacteria	p__Desulfobacterota	c__JADFVX01	o__JADFVX01	f__JADFVX01	g__JADFVX01	s__
MetaBAT2_CS05_bin.105	223_1	d__Bacteria	p__Desulfobacterota	c__JADFVX01	o__JADFVX01	f__JADFVX01	g__JADFVX01	s__
CONCOCT_CS05_bin.180	224_1	d__Bacteria	p__Desulfobacterota	c__JADFVX01	o__JADFVX01	f__JADFVX01	g__	s__
ComeBin_CS05_bin.181476	224_1	d__Bacteria	p__Desulfobacterota	c__JADFVX01	o__JADFVX01	f__JADFVX01	g__	s__
CompleteBin_CS05.823	224_1	d__Bacteria	p__Desulfobacterota	c__JADFVX01	o__JADFVX01	f__JADFVX01	g__	s__
ComeBin_CS12_bin.131249	225_1	d__Bacteria	p__Desulfobacterota	c__Syntrophobacteria	o__BM002	f__BM002	g__BM002	s__BM002 sp030601545
CompleteBin_CS12.323	225_1	d__Bacteria	p__Desulfobacterota	c__Syntrophobacteria	o__BM002	f__BM002	g__BM002	s__BM002 sp030601545
VAMB_CS12_bin.12289	225_1	d__Bacteria	p__Desulfobacterota	c__Syntrophobacteria	o__BM002	f__BM002	g__BM002	s__BM002 sp030601545
CONCOCT_CS05_bin.130	225_2	d__Bacteria	p__Desulfobacterota	c__Syntrophobacteria	o__BM002	f__BM002	g__BM002	s__BM002 sp030613915
ComeBin_CS05_bin.128638	225_2	d__Bacteria	p__Desulfobacterota	c__Syntrophobacteria	o__BM002	f__BM002	g__BM002	s__BM002 sp030613915
CompleteBin_CS05.246	225_2	d__Bacteria	p__Desulfobacterota	c__Syntrophobacteria	o__BM002	f__BM002	g__BM002	s__BM002 sp030613915
MetaBAT2_CS05_bin.8	225_2	d__Bacteria	p__Desulfobacterota	c__Syntrophobacteria	o__BM002	f__BM002	g__BM002	s__BM002 sp030613915
CONCOCT_CS10_bin.133	225_3	d__Bacteria	p__Desulfobacterota	c__Syntrophobacteria	o__BM002	f__BM002	g__BM002	s__BM002 sp030613915
ComeBin_CS10_bin.172369	225_3	d__Bacteria	p__Desulfobacterota	c__Syntrophobacteria	o__BM002	f__BM002	g__BM002	s__BM002 sp030613915
CompleteBin_CS10.563	225_3	d__Bacteria	p__Desulfobacterota	c__Syntrophobacteria	o__BM002	f__BM002	g__BM002	s__BM002 sp030613915
CompleteBin_CS10.884	225_3	d__Bacteria	p__Desulfobacterota	c__Syntrophobacteria	o__BM002	f__BM002	g__BM002	s__BM002 sp030613915
MetaBAT2_CS10_bin.84	225_3	d__Bacteria	p__Desulfobacterota	c__Syntrophobacteria	o__BM002	f__BM002	g__BM002	s__BM002 sp030613915
VAMB_CS10_bin.12635	225_3	d__Bacteria	p__Desulfobacterota	c__Syntrophobacteria	o__BM002	f__BM002	g__BM002	s__BM002 sp030613915
CONCOCT_CS12_bin.77	226_1	d__Bacteria	p__Cloacimonadota	c__Cloacimonadia	o__Cloacimonadales	f__TCS61	g__SDB	s__
ComeBin_CS12_bin.68258	226_1	d__Bacteria	p__Cloacimonadota	c__Cloacimonadia	o__Cloacimonadales	f__TCS61	g__SDB	s__
CompleteBin_CS12.142	226_1	d__Bacteria	p__Cloacimonadota	c__Cloacimonadia	o__Cloacimonadales	f__TCS61	g__SDB	s__
ComeBin_CS05_bin.0	227_1	d__Bacteria	p__Pseudomonadota	c__Gammaproteobacteria	o__Burkholderiales	f__Nitrosomonadaceae	g__GCA-2721545	s__GCA-2721545 sp003230615
CompleteBin_CS05.20	227_1	d__Bacteria	p__Pseudomonadota	c__Gammaproteobacteria	o__Burkholderiales	f__Nitrosomonadaceae	g__GCA-2721545	s__GCA-2721545 sp003230615
MetaBAT2_CS05_bin.83	227_1	d__Bacteria	p__Pseudomonadota	c__Gammaproteobacteria	o__Burkholderiales	f__Nitrosomonadaceae	g__GCA-2721545	s__GCA-2721545 sp003230615
SemiBin2_CS05_SemiBin.2	227_1	d__Bacteria	p__Pseudomonadota	c__Gammaproteobacteria	o__Burkholderiales	f__Nitrosomonadaceae	g__GCA-2721545	s__GCA-2721545 sp003230615
VAMB_CS05_bin.28401	227_1	d__Bacteria	p__Pseudomonadota	c__Gammaproteobacteria	o__Burkholderiales	f__Nitrosomonadaceae	g__GCA-2721545	s__GCA-2721545 sp003230615
ComeBin_CS01_bin.250446	228_1	d__Bacteria	p__Desulfobacterota	c__Desulfobacteria	o__Desulfobacterales	f__QNYZ01	g__QNYZ01	s__
CompleteBin_CS01.650	228_1	d__Bacteria	p__Desulfobacterota	c__Desulfobacteria	o__Desulfobacterales	f__QNYZ01	g__QNYZ01	s__
ComeBin_CS08_bin.32494	228_2	d__Bacteria	p__Desulfobacterota	c__Desulfobacteria	o__Desulfobacterales	f__QNYZ01	g__QNYZ01	s__
CompleteBin_CS08.32	228_2	d__Bacteria	p__Desulfobacterota	c__Desulfobacteria	o__Desulfobacterales	f__QNYZ01	g__QNYZ01	s__
MetaBAT2_CS08_bin.123	228_2	d__Bacteria	p__Desulfobacterota	c__Desulfobacteria	o__Desulfobacterales	f__QNYZ01	g__QNYZ01	s__
SemiBin2_CS08_SemiBin.74	228_2	d__Bacteria	p__Desulfobacterota	c__Desulfobacteria	o__Desulfobacterales	f__QNYZ01	g__QNYZ01	s__
VAMB_CS08_bin.18218	228_2	d__Bacteria	p__Desulfobacterota	c__Desulfobacteria	o__Desulfobacterales	f__QNYZ01	g__QNYZ01	s__
ComeBin_CS01_bin.12357	229_1	d__Bacteria	p__Zixibacteria	c__MSB-5A5	o__GN15	f__FEB-12	g__	s__
CompleteBin_CS01.301	229_1	d__Bacteria	p__Zixibacteria	c__MSB-5A5	o__GN15	f__FEB-12	g__	s__
CompleteBin_CS01.419	229_1	d__Bacteria	p__Zixibacteria	c__MSB-5A5	o__GN15	f__FEB-12	g__	s__
CompleteBin_CS01.760	229_1	d__Bacteria	p__Zixibacteria	c__MSB-5A5	o__GN15	f__FEB-12	g__	s__
MetaBAT2_CS01_bin.42	229_1	d__Bacteria	p__Zixibacteria	c__MSB-5A5	o__GN15	f__FEB-12	g__	s__
SemiBin2_CS01_SemiBin.67	229_1	d__Bacteria	p__Zixibacteria	c__MSB-5A5	o__GN15	f__FEB-12	g__	s__
VAMB_CS01_bin.14610	229_1	d__Bacteria	p__Zixibacteria	c__MSB-5A5	o__GN15	f__FEB-12	g__	s__
CONCOCT_CS03_bin.135	23_1	d__Bacteria	p__Chloroflexota	c__Anaerolineae	o__B4-G1	f__SLSP01	g__JAUWHU01	s__JAUWHU01 sp030605705
ComeBin_CS03_bin.118477	23_1	d__Bacteria	p__Chloroflexota	c__Anaerolineae	o__B4-G1	f__SLSP01	g__JAUWHU01	s__JAUWHU01 sp030605705
CompleteBin_CS03.324	23_1	d__Bacteria	p__Chloroflexota	c__Anaerolineae	o__B4-G1	f__SLSP01	g__JAUWHU01	s__JAUWHU01 sp030605705
CONCOCT_CS01_bin.169	23_2	d__Bacteria	p__Chloroflexota	c__Anaerolineae	o__B4-G1	f__SLSP01	g__JAUWHU01	s__
ComeBin_CS01_bin.87514	23_2	d__Bacteria	p__Chloroflexota	c__Anaerolineae	o__B4-G1	f__SLSP01	g__JAUWHU01	s__
CompleteBin_CS01.242	23_2	d__Bacteria	p__Chloroflexota	c__Anaerolineae	o__B4-G1	f__SLSP01	g__JAUWHU01	s__
CompleteBin_CS01.290	23_2	d__Bacteria	p__Chloroflexota	c__Anaerolineae	o__B4-G1	f__SLSP01	g__JAUWHU01	s__
CompleteBin_CS01.394	23_2	d__Bacteria	p__Chloroflexota	c__Anaerolineae	o__B4-G1	f__SLSP01	g__JAUWHU01	s__
CompleteBin_CS01.574	23_2	d__Bacteria	p__Chloroflexota	c__Anaerolineae	o__B4-G1	f__SLSP01	g__JAUWHU01	s__
CompleteBin_CS01.106	230_0	d__Bacteria	p__Spirochaetota	c__Spirochaetia	o__SZUA-6	f__DRHE01	g__DRHE01	s__
CONCOCT_CS03_bin.92	231_1	d__Bacteria	p__Desulfobacterota	c__Dissulfuribacteria	o__Dissulfuribacterales	f__UBA3076	g__UBA3076	s__UBA3076 sp030605675
ComeBin_CS03_bin.54114	231_1	d__Bacteria	p__Desulfobacterota	c__Dissulfuribacteria	o__Dissulfuribacterales	f__UBA3076	g__UBA3076	s__UBA3076 sp030605675
CompleteBin_CS03.163	231_1	d__Bacteria	p__Desulfobacterota	c__Dissulfuribacteria	o__Dissulfuribacterales	f__UBA3076	g__UBA3076	s__UBA3076 sp030605675
VAMB_CS03_bin.17790	231_2	d__Bacteria	p__Desulfobacterota	c__Dissulfuribacteria	o__Dissulfuribacterales	f__UBA3076	g__UBA3076	s__
CONCOCT_CS08_bin.101	231_3	d__Bacteria	p__Desulfobacterota	c__Dissulfuribacteria	o__Dissulfuribacterales	f__UBA3076	g__UBA3076	s__
CompleteBin_CS08.279	231_3	d__Bacteria	p__Desulfobacterota	c__Dissulfuribacteria	o__Dissulfuribacterales	f__UBA3076	g__UBA3076	s__
CompleteBin_CS08.31	231_3	d__Bacteria	p__Desulfobacterota	c__Dissulfuribacteria	o__Dissulfuribacterales	f__UBA3076	g__UBA3076	s__
CONCOCT_CS01_bin.137	231_4	d__Bacteria	p__Desulfobacterota	c__Dissulfuribacteria	o__Dissulfuribacterales	f__UBA3076	g__UBA3076	s__UBA3076 sp030618205
ComeBin_CS01_bin.142054	231_4	d__Bacteria	p__Desulfobacterota	c__Dissulfuribacteria	o__Dissulfuribacterales	f__UBA3076	g__UBA3076	s__UBA3076 sp030618205
CompleteBin_CS01.477	231_4	d__Bacteria	p__Desulfobacterota	c__Dissulfuribacteria	o__Dissulfuribacterales	f__UBA3076	g__UBA3076	s__UBA3076 sp030618205
CompleteBin_CS01.555	231_4	d__Bacteria	p__Desulfobacterota	c__Dissulfuribacteria	o__Dissulfuribacterales	f__UBA3076	g__UBA3076	s__UBA3076 sp030618205
VAMB_CS01_bin.15803	231_4	d__Bacteria	p__Desulfobacterota	c__Dissulfuribacteria	o__Dissulfuribacterales	f__UBA3076	g__UBA3076	s__UBA3076 sp030618205
CONCOCT_CS12_bin.62	231_5	d__Bacteria	p__Desulfobacterota	c__Dissulfuribacteria	o__Dissulfuribacterales	f__UBA3076	g__UBA3076	s__UBA3076 sp013138705
ComeBin_CS12_bin.99208	231_5	d__Bacteria	p__Desulfobacterota	c__Dissulfuribacteria	o__Dissulfuribacterales	f__UBA3076	g__UBA3076	s__UBA3076 sp013138705
CompleteBin_CS12.219	231_5	d__Bacteria	p__Desulfobacterota	c__Dissulfuribacteria	o__Dissulfuribacterales	f__UBA3076	g__UBA3076	s__UBA3076 sp013138705
CompleteBin_CS12.98	231_5	d__Bacteria	p__Desulfobacterota	c__Dissulfuribacteria	o__Dissulfuribacterales	f__UBA3076	g__UBA3076	s__UBA3076 sp013138705
CONCOCT_CS12_bin.15	232_1	d__Bacteria	p__Aerophobota	c__Aerophobia	o__Aerophobales	f__AE-B3A	g__AE-B3A	s__
ComeBin_CS12_bin.139606	232_1	d__Bacteria	p__Aerophobota	c__Aerophobia	o__Aerophobales	f__AE-B3A	g__AE-B3A	s__
CompleteBin_CS12.341	232_1	d__Bacteria	p__Aerophobota	c__Aerophobia	o__Aerophobales	f__AE-B3A	g__AE-B3A	s__
CONCOCT_CS03_bin.9	232_2	d__Bacteria	p__Aerophobota	c__Aerophobia	o__Aerophobales	f__AE-B3A	g__AE-B3A	s__
ComeBin_CS03_bin.60694	232_2	d__Bacteria	p__Aerophobota	c__Aerophobia	o__Aerophobales	f__AE-B3A	g__AE-B3A	s__
CompleteBin_CS03.106	232_2	d__Bacteria	p__Aerophobota	c__Aerophobia	o__Aerophobales	f__AE-B3A	g__AE-B3A	s__
ComeBin_CS12_bin.46989	233_1	d__Bacteria	p__Desulfobacterota	c__Desulfobacteria	o__C00003060	f__C00003060	g__JAFGFW01	s__JAFGFW01 sp030667105
CompleteBin_CS12.90	233_1	d__Bacteria	p__Desulfobacterota	c__Desulfobacteria	o__C00003060	f__C00003060	g__JAFGFW01	s__JAFGFW01 sp030667105
MetaBAT2_CS12_bin.64	233_1	d__Bacteria	p__Desulfobacterota	c__Desulfobacteria	o__C00003060	f__C00003060	g__JAFGFW01	s__JAFGFW01 sp030667105
CompleteBin_CS05.390	233_2	d__Bacteria	p__Desulfobacterota	c__Desulfobacteria	o__C00003060	f__C00003060	g__JAFGFW01	s__
ComeBin_CS01_bin.15478	234_1	d__Bacteria	p__Desulfobacterota	c__Desulfobacteria	o__C00003060	f__C00003060	g__JAUVJO01	s__JAUVJO01 sp030592345
CompleteBin_CS01.281	234_1	d__Bacteria	p__Desulfobacterota	c__Desulfobacteria	o__C00003060	f__C00003060	g__JAUVJO01	s__JAUVJO01 sp030592345
SemiBin2_CS01_SemiBin.12	234_1	d__Bacteria	p__Desulfobacterota	c__Desulfobacteria	o__C00003060	f__C00003060	g__JAUVJO01	s__JAUVJO01 sp030592345
VAMB_CS01_bin.26903	234_1	d__Bacteria	p__Desulfobacterota	c__Desulfobacteria	o__C00003060	f__C00003060	g__JAUVJO01	s__JAUVJO01 sp030592345
ComeBin_CS12_bin.86258	235_1	d__Bacteria	p__Desulfobacterota	c__Desulfobacteria	o__C00003060	f__C00003060	g__JAFDKF01	s__JAFDKF01 sp030668505
CompleteBin_CS12.195	235_1	d__Bacteria	p__Desulfobacterota	c__Desulfobacteria	o__C00003060	f__C00003060	g__JAFDKF01	s__JAFDKF01 sp030668505
VAMB_CS12_bin.15199	235_1	d__Bacteria	p__Desulfobacterota	c__Desulfobacteria	o__C00003060	f__C00003060	g__JAFDKF01	s__JAFDKF01 sp030668505
ComeBin_CS05_bin.74690	235_2	d__Bacteria	p__Desulfobacterota	c__Desulfobacteria	o__C00003060	f__C00003060	g__JAFDKF01	s__JAFDKF01 sp030613145
CompleteBin_CS05.223	235_2	d__Bacteria	p__Desulfobacterota	c__Desulfobacteria	o__C00003060	f__C00003060	g__JAFDKF01	s__JAFDKF01 sp030613145
MetaBAT2_CS05_bin.26	235_2	d__Bacteria	p__Desulfobacterota	c__Desulfobacteria	o__C00003060	f__C00003060	g__JAFDKF01	s__JAFDKF01 sp030613145
ComeBin_CS05_bin.126155	236_1	d__Bacteria	p__Desulfobacterota	c__Desulfobacteria	o__C00003060	f__C00003060	g__JAFDFO01	s__
CompleteBin_CS05.280	236_1	d__Bacteria	p__Desulfobacterota	c__Desulfobacteria	o__C00003060	f__C00003060	g__JAFDFO01	s__
CompleteBin_CS05.347	236_1	d__Bacteria	p__Desulfobacterota	c__Desulfobacteria	o__C00003060	f__C00003060	g__JAFDFO01	s__
MetaBAT2_CS05_bin.58	236_1	d__Bacteria	p__Desulfobacterota	c__Desulfobacteria	o__C00003060	f__C00003060	g__JAFDFO01	s__
CompleteBin_CS05.479	237_0	d__Bacteria	p__Desulfobacterota	c__DSM-4660	o__Desulfatiglandales	f__HGW-15	g__	s__
CompleteBin_CS05.665	238_0	d__Bacteria	p__Nitrospirota	c__Nitrospiria	o__Nitrospirales	f__UBA8639	g__UBA8639	s__
CompleteBin_CS05.401	239_1	d__Bacteria	p__Desulfobacterota	c__DSM-4660	o__Desulfatiglandales	f__Desulfatiglandaceae	g__JABMQV01	s__
CompleteBin_CS05.49	239_1	d__Bacteria	p__Desulfobacterota	c__DSM-4660	o__Desulfatiglandales	f__Desulfatiglandaceae	g__JABMQV01	s__
CompleteBin_CS08.331	24_0	d__Bacteria	p__Acidobacteriota	c__Thermoanaerobaculia	o__Multivoradales	f__UBA5704	g__JAUVRX01	s__
ComeBin_CS01_bin.59572	240_1	d__Bacteria	p__Desulfobacterota	c__DSM-4660	o__Desulfatiglandales	f__Desulfatiglandaceae	g__	s__
CompleteBin_CS01.274	240_1	d__Bacteria	p__Desulfobacterota	c__DSM-4660	o__Desulfatiglandales	f__Desulfatiglandaceae	g__	s__
CompleteBin_CS01.309	240_1	d__Bacteria	p__Desulfobacterota	c__DSM-4660	o__Desulfatiglandales	f__Desulfatiglandaceae	g__	s__
CompleteBin_CS01.334	240_1	d__Bacteria	p__Desulfobacterota	c__DSM-4660	o__Desulfatiglandales	f__Desulfatiglandaceae	g__	s__
SemiBin2_CS01_SemiBin.191	240_1	d__Bacteria	p__Desulfobacterota	c__DSM-4660	o__Desulfatiglandales	f__Desulfatiglandaceae	g__	s__
ComeBin_CS01_bin.247514	241_0	d__Bacteria	p__Desulfobacterota	c__DSM-4660	o__Desulfatiglandales	f__Desulfatiglandaceae	g__	s__
ComeBin_CS01_bin.172345	242_1	d__Bacteria	p__Bdellovibrionota	c__JAFGOL01	o__	f__	g__	s__
CompleteBin_CS01.648	242_1	d__Bacteria	p__Bdellovibrionota	c__JAFGOL01	o__	f__	g__	s__
ComeBin_CS01_bin.89040	243_1	d__Bacteria	p__Desulfobacterota	c__Syntrophia	o__Syntrophales	f__JADFWA01	g__JAUSPI01	s__
CompleteBin_CS01.433	243_1	d__Bacteria	p__Desulfobacterota	c__Syntrophia	o__Syntrophales	f__JADFWA01	g__JAUSPI01	s__
ComeBin_CS01_bin.5735	244_1	d__Bacteria	p__Desulfobacterota	c__Syntrophia	o__Syntrophales	f__JADFWA01	g__JADFWA01	s__JADFWA01 sp030596145
CompleteBin_CS01.498	244_1	d__Bacteria	p__Desulfobacterota	c__Syntrophia	o__Syntrophales	f__JADFWA01	g__JADFWA01	s__JADFWA01 sp030596145
CompleteBin_CS01.508	244_1	d__Bacteria	p__Desulfobacterota	c__Syntrophia	o__Syntrophales	f__JADFWA01	g__JADFWA01	s__JADFWA01 sp030596145
SemiBin2_CS01_SemiBin.38	244_1	d__Bacteria	p__Desulfobacterota	c__Syntrophia	o__Syntrophales	f__JADFWA01	g__JADFWA01	s__JADFWA01 sp030596145
ComeBin_CS12_bin.14536	245_1	d__Bacteria	p__Desulfobacterota	c__Desulfobacteria	o__Desulfobacterales	f__JAUVVS01	g__JAUVVS01	s__JAUVVS01 sp030604545
CompleteBin_CS12.316	245_1	d__Bacteria	p__Desulfobacterota	c__Desulfobacteria	o__Desulfobacterales	f__JAUVVS01	g__JAUVVS01	s__JAUVVS01 sp030604545
CompleteBin_CS12.403	245_1	d__Bacteria	p__Desulfobacterota	c__Desulfobacteria	o__Desulfobacterales	f__JAUVVS01	g__JAUVVS01	s__JAUVVS01 sp030604545
CompleteBin_CS12.436	245_1	d__Bacteria	p__Desulfobacterota	c__Desulfobacteria	o__Desulfobacterales	f__JAUVVS01	g__JAUVVS01	s__JAUVVS01 sp030604545
MetaBAT2_CS12_bin.99	245_1	d__Bacteria	p__Desulfobacterota	c__Desulfobacteria	o__Desulfobacterales	f__JAUVVS01	g__JAUVVS01	s__JAUVVS01 sp030604545
SemiBin2_CS12_SemiBin.49	245_1	d__Bacteria	p__Desulfobacterota	c__Desulfobacteria	o__Desulfobacterales	f__JAUVVS01	g__JAUVVS01	s__JAUVVS01 sp030604545
CONCOCT_CS12_bin.19	246_1	d__Bacteria	p__Desulfobacterota	c__Desulfobacteria	o__Desulfobacterales	f__UBA11574	g__JAUVVL01	s__
ComeBin_CS12_bin.51881	246_1	d__Bacteria	p__Desulfobacterota	c__Desulfobacteria	o__Desulfobacterales	f__UBA11574	g__JAUVVL01	s__
CompleteBin_CS12.102	246_1	d__Bacteria	p__Desulfobacterota	c__Desulfobacteria	o__Desulfobacterales	f__UBA11574	g__JAUVVL01	s__
MetaBAT2_CS12_bin.45	246_1	d__Bacteria	p__Desulfobacterota	c__Desulfobacteria	o__Desulfobacterales	f__UBA11574	g__JAUVVL01	s__
SemiBin2_CS12_SemiBin.165	246_1	d__Bacteria	p__Desulfobacterota	c__Desulfobacteria	o__Desulfobacterales	f__UBA11574	g__JAUVVL01	s__
ComeBin_CS05_bin.12304	246_2	d__Bacteria	p__Desulfobacterota	c__Desulfobacteria	o__Desulfobacterales	f__UBA11574	g__JAUVVL01	s__
CompleteBin_CS05.667	246_2	d__Bacteria	p__Desulfobacterota	c__Desulfobacteria	o__Desulfobacterales	f__UBA11574	g__JAUVVL01	s__
MetaBAT2_CS05_bin.18	246_2	d__Bacteria	p__Desulfobacterota	c__Desulfobacteria	o__Desulfobacterales	f__UBA11574	g__JAUVVL01	s__
SemiBin2_CS05_SemiBin.35	246_2	d__Bacteria	p__Desulfobacterota	c__Desulfobacteria	o__Desulfobacterales	f__UBA11574	g__JAUVVL01	s__
VAMB_CS05_bin.36238	246_2	d__Bacteria	p__Desulfobacterota	c__Desulfobacteria	o__Desulfobacterales	f__UBA11574	g__JAUVVL01	s__
ComeBin_CS05_bin.19194	247_1	d__Bacteria	p__Desulfobacterota	c__Desulfobacteria	o__Desulfobacterales	f__UBA11574	g__S5133MH16	s__
CompleteBin_CS05.22	247_1	d__Bacteria	p__Desulfobacterota	c__Desulfobacteria	o__Desulfobacterales	f__UBA11574	g__S5133MH16	s__
CompleteBin_CS05.328	247_1	d__Bacteria	p__Desulfobacterota	c__Desulfobacteria	o__Desulfobacterales	f__UBA11574	g__S5133MH16	s__
MetaBAT2_CS05_bin.40	247_1	d__Bacteria	p__Desulfobacterota	c__Desulfobacteria	o__Desulfobacterales	f__UBA11574	g__S5133MH16	s__
ComeBin_CS08_bin.51730	248_1	d__Bacteria	p__Desulfobacterota	c__Desulfobacteria	o__Desulfobacterales	f__UBA11574	g__S5133MH16	s__S5133MH16 sp001751005
CompleteBin_CS08.84	248_1	d__Bacteria	p__Desulfobacterota	c__Desulfobacteria	o__Desulfobacterales	f__UBA11574	g__S5133MH16	s__S5133MH16 sp001751005
MetaBAT2_CS08_bin.76	248_1	d__Bacteria	p__Desulfobacterota	c__Desulfobacteria	o__Desulfobacterales	f__UBA11574	g__S5133MH16	s__S5133MH16 sp001751005
SemiBin2_CS08_SemiBin.110	248_1	d__Bacteria	p__Desulfobacterota	c__Desulfobacteria	o__Desulfobacterales	f__UBA11574	g__S5133MH16	s__S5133MH16 sp001751005
VAMB_CS08_bin.21109	248_1	d__Bacteria	p__Desulfobacterota	c__Desulfobacteria	o__Desulfobacterales	f__UBA11574	g__S5133MH16	s__S5133MH16 sp001751005
CONCOCT_CS12_bin.267	248_2	d__Bacteria	p__Desulfobacterota	c__Desulfobacteria	o__Desulfobacterales	f__UBA11574	g__S5133MH16	s__S5133MH16 sp001751005
ComeBin_CS12_bin.40261	248_2	d__Bacteria	p__Desulfobacterota	c__Desulfobacteria	o__Desulfobacterales	f__UBA11574	g__S5133MH16	s__S5133MH16 sp001751005
CompleteBin_CS12.76	248_2	d__Bacteria	p__Desulfobacterota	c__Desulfobacteria	o__Desulfobacterales	f__UBA11574	g__S5133MH16	s__S5133MH16 sp001751005
VAMB_CS12_bin.15702	248_2	d__Bacteria	p__Desulfobacterota	c__Desulfobacteria	o__Desulfobacterales	f__UBA11574	g__S5133MH16	s__S5133MH16 sp001751005
CONCOCT_CS03_bin.173	248_3	d__Bacteria	p__Desulfobacterota	c__Desulfobacteria	o__Desulfobacterales	f__UBA11574	g__S5133MH16	s__S5133MH16 sp001751005
ComeBin_CS03_bin.85224	248_3	d__Bacteria	p__Desulfobacterota	c__Desulfobacteria	o__Desulfobacterales	f__UBA11574	g__S5133MH16	s__S5133MH16 sp001751005
CompleteBin_CS03.232	248_3	d__Bacteria	p__Desulfobacterota	c__Desulfobacteria	o__Desulfobacterales	f__UBA11574	g__S5133MH16	s__S5133MH16 sp001751005
CompleteBin_CS03.56	248_3	d__Bacteria	p__Desulfobacterota	c__Desulfobacteria	o__Desulfobacterales	f__UBA11574	g__S5133MH16	s__S5133MH16 sp001751005
CONCOCT_CS01_bin.152	248_4	d__Bacteria	p__Desulfobacterota	c__Desulfobacteria	o__Desulfobacterales	f__UBA11574	g__S5133MH16	s__
ComeBin_CS01_bin.76800	248_4	d__Bacteria	p__Desulfobacterota	c__Desulfobacteria	o__Desulfobacterales	f__UBA11574	g__S5133MH16	s__
CompleteBin_CS01.1587	248_4	d__Bacteria	p__Desulfobacterota	c__Desulfobacteria	o__Desulfobacterales	f__UBA11574	g__S5133MH16	s__
CompleteBin_CS01.235	248_4	d__Bacteria	p__Desulfobacterota	c__Desulfobacteria	o__Desulfobacterales	f__UBA11574	g__S5133MH16	s__
CompleteBin_CS01.397	248_4	d__Bacteria	p__Desulfobacterota	c__Desulfobacteria	o__Desulfobacterales	f__UBA11574	g__S5133MH16	s__
CompleteBin_CS01.823	248_4	d__Bacteria	p__Desulfobacterota	c__Desulfobacteria	o__Desulfobacterales	f__UBA11574	g__S5133MH16	s__
CONCOCT_CS05_bin.71	249_1	d__Bacteria	p__Desulfobacterota	c__Desulfobacteria	o__Desulfobacterales	f__JAUWMJ01	g__JAUWMJ01	s__
ComeBin_CS05_bin.92325	249_1	d__Bacteria	p__Desulfobacterota	c__Desulfobacteria	o__Desulfobacterales	f__JAUWMJ01	g__JAUWMJ01	s__
CompleteBin_CS05.213	249_1	d__Bacteria	p__Desulfobacterota	c__Desulfobacteria	o__Desulfobacterales	f__JAUWMJ01	g__JAUWMJ01	s__
CONCOCT_CS03_bin.211	249_2	d__Bacteria	p__Desulfobacterota	c__Desulfobacteria	o__Desulfobacterales	f__JAUWMJ01	g__JAUWMJ01	s__
ComeBin_CS03_bin.97626	249_2	d__Bacteria	p__Desulfobacterota	c__Desulfobacteria	o__Desulfobacterales	f__JAUWMJ01	g__JAUWMJ01	s__
CompleteBin_CS03.267	249_2	d__Bacteria	p__Desulfobacterota	c__Desulfobacteria	o__Desulfobacterales	f__JAUWMJ01	g__JAUWMJ01	s__
CompleteBin_CS01.133	249_3	d__Bacteria	p__Desulfobacterota	c__Desulfobacteria	o__Desulfobacterales	f__JAUWMJ01	g__JAUWMJ01	s__
CompleteBin_CS01.548	249_3	d__Bacteria	p__Desulfobacterota	c__Desulfobacteria	o__Desulfobacterales	f__JAUWMJ01	g__JAUWMJ01	s__
CompleteBin_CS01.560	249_3	d__Bacteria	p__Desulfobacterota	c__Desulfobacteria	o__Desulfobacterales	f__JAUWMJ01	g__JAUWMJ01	s__
CompleteBin_CS01.831	249_3	d__Bacteria	p__Desulfobacterota	c__Desulfobacteria	o__Desulfobacterales	f__JAUWMJ01	g__JAUWMJ01	s__
CompleteBin_CS01.855	249_3	d__Bacteria	p__Desulfobacterota	c__Desulfobacteria	o__Desulfobacterales	f__JAUWMJ01	g__JAUWMJ01	s__
CompleteBin_CS08.357	249_4	d__Bacteria	p__Desulfobacterota	c__Desulfobacteria	o__Desulfobacterales	f__JAUWMJ01	g__JAUWMJ01	s__
CompleteBin_CS08.358	249_4	d__Bacteria	p__Desulfobacterota	c__Desulfobacteria	o__Desulfobacterales	f__JAUWMJ01	g__JAUWMJ01	s__
CompleteBin_CS10.863	249_5	d__Bacteria	p__Desulfobacterota	c__Desulfobacteria	o__Desulfobacterales	f__JAUWMJ01	g__JAUWMJ01	s__
CompleteBin_CS12.467	249_6	d__Bacteria	p__Desulfobacterota	c__Desulfobacteria	o__Desulfobacterales	f__JAUWMJ01	g__JAUWMJ01	s__
CONCOCT_CS05_bin.88	25_1	d__Bacteria	p__Chloroflexota	c__Anaerolineae	o__Anaerolineales	f__UBA11858	g__UBA11858	s__
ComeBin_CS05_bin.64064	25_1	d__Bacteria	p__Chloroflexota	c__Anaerolineae	o__Anaerolineales	f__UBA11858	g__UBA11858	s__
CompleteBin_CS05.164	25_1	d__Bacteria	p__Chloroflexota	c__Anaerolineae	o__Anaerolineales	f__UBA11858	g__UBA11858	s__
MetaBAT2_CS05_bin.82	25_1	d__Bacteria	p__Chloroflexota	c__Anaerolineae	o__Anaerolineales	f__UBA11858	g__UBA11858	s__
SemiBin2_CS05_SemiBin.96	25_1	d__Bacteria	p__Chloroflexota	c__Anaerolineae	o__Anaerolineales	f__UBA11858	g__UBA11858	s__
CONCOCT_CS08_bin.173	25_2	d__Bacteria	p__Chloroflexota	c__Anaerolineae	o__Anaerolineales	f__UBA11858	g__UBA11858	s__
ComeBin_CS08_bin.196786	25_2	d__Bacteria	p__Chloroflexota	c__Anaerolineae	o__Anaerolineales	f__UBA11858	g__UBA11858	s__
CompleteBin_CS08.317	25_2	d__Bacteria	p__Chloroflexota	c__Anaerolineae	o__Anaerolineales	f__UBA11858	g__UBA11858	s__
MetaBAT2_CS08_bin.118	25_2	d__Bacteria	p__Chloroflexota	c__Anaerolineae	o__Anaerolineales	f__UBA11858	g__UBA11858	s__
CONCOCT_CS03_bin.69	25_3	d__Bacteria	p__Chloroflexota	c__Anaerolineae	o__Anaerolineales	f__UBA11858	g__UBA11858	s__
ComeBin_CS12_bin.27038	250_1	d__Bacteria	p__Desulfobacterota	c__DSM-4660	o__Desulfatiglandales	f__Desulfatiglandaceae	g__JAFDHL01	s__JAFDHL01 sp019308785
CompleteBin_CS12.43	250_1	d__Bacteria	p__Desulfobacterota	c__DSM-4660	o__Desulfatiglandales	f__Desulfatiglandaceae	g__JAFDHL01	s__JAFDHL01 sp019308785
MetaBAT2_CS12_bin.51	250_1	d__Bacteria	p__Desulfobacterota	c__DSM-4660	o__Desulfatiglandales	f__Desulfatiglandaceae	g__JAFDHL01	s__JAFDHL01 sp019308785
SemiBin2_CS12_SemiBin.84	250_1	d__Bacteria	p__Desulfobacterota	c__DSM-4660	o__Desulfatiglandales	f__Desulfatiglandaceae	g__JAFDHL01	s__JAFDHL01 sp019308785
VAMB_CS12_bin.14020	250_1	d__Bacteria	p__Desulfobacterota	c__DSM-4660	o__Desulfatiglandales	f__Desulfatiglandaceae	g__JAFDHL01	s__JAFDHL01 sp019308785
CONCOCT_CS10_bin.128	251_1	d__Bacteria	p__Desulfobacterota	c__DSM-4660	o__Desulfatiglandales	f__Desulfatiglandaceae	g__4484-190-2	s__4484-190-2 sp030612945
ComeBin_CS10_bin.105763	251_1	d__Bacteria	p__Desulfobacterota	c__DSM-4660	o__Desulfatiglandales	f__Desulfatiglandaceae	g__4484-190-2	s__4484-190-2 sp030612945
CompleteBin_CS10.721	251_1	d__Bacteria	p__Desulfobacterota	c__DSM-4660	o__Desulfatiglandales	f__Desulfatiglandaceae	g__4484-190-2	s__4484-190-2 sp030612945
MetaBAT2_CS10_bin.145	251_1	d__Bacteria	p__Desulfobacterota	c__DSM-4660	o__Desulfatiglandales	f__Desulfatiglandaceae	g__4484-190-2	s__4484-190-2 sp030612945
SemiBin2_CS10_SemiBin.187	251_1	d__Bacteria	p__Desulfobacterota	c__DSM-4660	o__Desulfatiglandales	f__Desulfatiglandaceae	g__4484-190-2	s__4484-190-2 sp030612945
CONCOCT_CS05_bin.190	251_2	d__Bacteria	p__Desulfobacterota	c__DSM-4660	o__Desulfatiglandales	f__Desulfatiglandaceae	g__4484-190-2	s__4484-190-2 sp030612945
ComeBin_CS05_bin.111821	251_2	d__Bacteria	p__Desulfobacterota	c__DSM-4660	o__Desulfatiglandales	f__Desulfatiglandaceae	g__4484-190-2	s__4484-190-2 sp030612945
CompleteBin_CS05.193	251_2	d__Bacteria	p__Desulfobacterota	c__DSM-4660	o__Desulfatiglandales	f__Desulfatiglandaceae	g__4484-190-2	s__4484-190-2 sp030612945
CompleteBin_CS05.306	251_2	d__Bacteria	p__Desulfobacterota	c__DSM-4660	o__Desulfatiglandales	f__Desulfatiglandaceae	g__4484-190-2	s__4484-190-2 sp030612945
MetaBAT2_CS05_bin.155	251_2	d__Bacteria	p__Desulfobacterota	c__DSM-4660	o__Desulfatiglandales	f__Desulfatiglandaceae	g__4484-190-2	s__4484-190-2 sp030612945
ComeBin_CS12_bin.148054	251_3	d__Bacteria	p__Desulfobacterota	c__DSM-4660	o__Desulfatiglandales	f__Desulfatiglandaceae	g__4484-190-2	s__4484-190-2 sp022013615
CompleteBin_CS12.293	251_3	d__Bacteria	p__Desulfobacterota	c__DSM-4660	o__Desulfatiglandales	f__Desulfatiglandaceae	g__4484-190-2	s__4484-190-2 sp022013615
CompleteBin_CS12.362	251_3	d__Bacteria	p__Desulfobacterota	c__DSM-4660	o__Desulfatiglandales	f__Desulfatiglandaceae	g__4484-190-2	s__4484-190-2 sp022013615
ComeBin_CS01_bin.183183	251_4	d__Bacteria	p__Desulfobacterota	c__DSM-4660	o__Desulfatiglandales	f__Desulfatiglandaceae	g__4484-190-2	s__4484-190-2 sp030612945
CompleteBin_CS01.279	251_4	d__Bacteria	p__Desulfobacterota	c__DSM-4660	o__Desulfatiglandales	f__Desulfatiglandaceae	g__4484-190-2	s__4484-190-2 sp030612945
VAMB_CS01_bin.20591	251_4	d__Bacteria	p__Desulfobacterota	c__DSM-4660	o__Desulfatiglandales	f__Desulfatiglandaceae	g__4484-190-2	s__4484-190-2 sp030612945
ComeBin_CS03_bin.129542	251_5	d__Bacteria	p__Desulfobacterota	c__DSM-4660	o__Desulfatiglandales	f__Desulfatiglandaceae	g__4484-190-2	s__4484-190-2 sp030612945
CompleteBin_CS03.225	251_5	d__Bacteria	p__Desulfobacterota	c__DSM-4660	o__Desulfatiglandales	f__Desulfatiglandaceae	g__4484-190-2	s__4484-190-2 sp030612945
CompleteBin_CS03.312	251_5	d__Bacteria	p__Desulfobacterota	c__DSM-4660	o__Desulfatiglandales	f__Desulfatiglandaceae	g__4484-190-2	s__4484-190-2 sp030612945
MetaBAT2_CS03_bin.4	251_5	d__Bacteria	p__Desulfobacterota	c__DSM-4660	o__Desulfatiglandales	f__Desulfatiglandaceae	g__4484-190-2	s__4484-190-2 sp030612945
VAMB_CS03_bin.14555	251_5	d__Bacteria	p__Desulfobacterota	c__DSM-4660	o__Desulfatiglandales	f__Desulfatiglandaceae	g__4484-190-2	s__4484-190-2 sp030612945
CONCOCT_CS08_bin.58	251_6	d__Bacteria	p__Desulfobacterota	c__DSM-4660	o__Desulfatiglandales	f__Desulfatiglandaceae	g__4484-190-2	s__4484-190-2 sp030612945
ComeBin_CS08_bin.112544	251_6	d__Bacteria	p__Desulfobacterota	c__DSM-4660	o__Desulfatiglandales	f__Desulfatiglandaceae	g__4484-190-2	s__4484-190-2 sp030612945
CompleteBin_CS08.204	251_6	d__Bacteria	p__Desulfobacterota	c__DSM-4660	o__Desulfatiglandales	f__Desulfatiglandaceae	g__4484-190-2	s__4484-190-2 sp030612945
MetaBAT2_CS08_bin.173	251_6	d__Bacteria	p__Desulfobacterota	c__DSM-4660	o__Desulfatiglandales	f__Desulfatiglandaceae	g__4484-190-2	s__4484-190-2 sp030612945
VAMB_CS08_bin.19946	251_6	d__Bacteria	p__Desulfobacterota	c__DSM-4660	o__Desulfatiglandales	f__Desulfatiglandaceae	g__4484-190-2	s__4484-190-2 sp030612945
CONCOCT_CS12_bin.228	252_0	Unclassified Bacteria
CompleteBin_CS08.164	253_0	Unclassified Bacteria
CompleteBin_CS12.856	254_0	Unclassified Bacteria
ComeBin_CS01_bin.11663	255_1	d__Bacteria	p__Desulfobacterota	c__UBA8473	o__UBA8473	f__UBA8473	g__JAUXFK01	s__JAUXFK01 sp030623035
ComeBin_CS03_bin.11666	255_1	d__Bacteria	p__Desulfobacterota	c__UBA8473	o__UBA8473	f__UBA8473	g__JAUXFK01	s__JAUXFK01 sp030623035
CompleteBin_CS01.247	255_1	d__Bacteria	p__Desulfobacterota	c__UBA8473	o__UBA8473	f__UBA8473	g__JAUXFK01	s__JAUXFK01 sp030623035
CompleteBin_CS01.264	255_1	d__Bacteria	p__Desulfobacterota	c__UBA8473	o__UBA8473	f__UBA8473	g__JAUXFK01	s__JAUXFK01 sp030623035
CompleteBin_CS01.338	255_1	d__Bacteria	p__Desulfobacterota	c__UBA8473	o__UBA8473	f__UBA8473	g__JAUXFK01	s__JAUXFK01 sp030623035
CompleteBin_CS01.382	255_1	d__Bacteria	p__Desulfobacterota	c__UBA8473	o__UBA8473	f__UBA8473	g__JAUXFK01	s__JAUXFK01 sp030623035
CompleteBin_CS01.718	255_1	d__Bacteria	p__Desulfobacterota	c__UBA8473	o__UBA8473	f__UBA8473	g__JAUXFK01	s__JAUXFK01 sp030623035
CompleteBin_CS03.126	255_1	d__Bacteria	p__Desulfobacterota	c__UBA8473	o__UBA8473	f__UBA8473	g__JAUXFK01	s__JAUXFK01 sp030623035
CompleteBin_CS03.172	255_1	d__Bacteria	p__Desulfobacterota	c__UBA8473	o__UBA8473	f__UBA8473	g__JAUXFK01	s__JAUXFK01 sp030623035
CompleteBin_CS03.599	255_1	d__Bacteria	p__Desulfobacterota	c__UBA8473	o__UBA8473	f__UBA8473	g__JAUXFK01	s__JAUXFK01 sp030623035
MetaBAT2_CS01_bin.107	255_1	d__Bacteria	p__Desulfobacterota	c__UBA8473	o__UBA8473	f__UBA8473	g__JAUXFK01	s__JAUXFK01 sp030623035
MetaBAT2_CS03_bin.110	255_1	d__Bacteria	p__Desulfobacterota	c__UBA8473	o__UBA8473	f__UBA8473	g__JAUXFK01	s__JAUXFK01 sp030623035
SemiBin2_CS01_SemiBin.64	255_1	d__Bacteria	p__Desulfobacterota	c__UBA8473	o__UBA8473	f__UBA8473	g__JAUXFK01	s__JAUXFK01 sp030623035
SemiBin2_CS03_SemiBin.65	255_1	d__Bacteria	p__Desulfobacterota	c__UBA8473	o__UBA8473	f__UBA8473	g__JAUXFK01	s__JAUXFK01 sp030623035
VAMB_CS01_bin.15866	255_1	d__Bacteria	p__Desulfobacterota	c__UBA8473	o__UBA8473	f__UBA8473	g__JAUXFK01	s__JAUXFK01 sp030623035
VAMB_CS03_bin.17917	255_1	d__Bacteria	p__Desulfobacterota	c__UBA8473	o__UBA8473	f__UBA8473	g__JAUXFK01	s__JAUXFK01 sp030623035
ComeBin_CS03_bin.37103	256_1	d__Bacteria	p__Desulfobacterota	c__UBA8473	o__UBA8473	f__UBA8473	g__JAUXHQ01	s__JAUXHQ01 sp030621455
CompleteBin_CS03.68	256_1	d__Bacteria	p__Desulfobacterota	c__UBA8473	o__UBA8473	f__UBA8473	g__JAUXHQ01	s__JAUXHQ01 sp030621455
MetaBAT2_CS03_bin.116	256_1	d__Bacteria	p__Desulfobacterota	c__UBA8473	o__UBA8473	f__UBA8473	g__JAUXHQ01	s__JAUXHQ01 sp030621455
SemiBin2_CS03_SemiBin.133	256_1	d__Bacteria	p__Desulfobacterota	c__UBA8473	o__UBA8473	f__UBA8473	g__JAUXHQ01	s__JAUXHQ01 sp030621455
VAMB_CS03_bin.36428	256_1	d__Bacteria	p__Desulfobacterota	c__UBA8473	o__UBA8473	f__UBA8473	g__JAUXHQ01	s__JAUXHQ01 sp030621455
ComeBin_CS01_bin.29223	256_2	d__Bacteria	p__Desulfobacterota	c__UBA8473	o__UBA8473	f__UBA8473	g__JAUXHQ01	s__JAUXHQ01 sp030621455
CompleteBin_CS01.221	256_2	d__Bacteria	p__Desulfobacterota	c__UBA8473	o__UBA8473	f__UBA8473	g__JAUXHQ01	s__JAUXHQ01 sp030621455
MetaBAT2_CS01_bin.133	256_2	d__Bacteria	p__Desulfobacterota	c__UBA8473	o__UBA8473	f__UBA8473	g__JAUXHQ01	s__JAUXHQ01 sp030621455
SemiBin2_CS01_SemiBin.97	256_2	d__Bacteria	p__Desulfobacterota	c__UBA8473	o__UBA8473	f__UBA8473	g__JAUXHQ01	s__JAUXHQ01 sp030621455
VAMB_CS01_bin.19763	256_2	d__Bacteria	p__Desulfobacterota	c__UBA8473	o__UBA8473	f__UBA8473	g__JAUXHQ01	s__JAUXHQ01 sp030621455
ComeBin_CS01_bin.12833	257_1	d__Bacteria	p__Desulfobacterota	c__Desulfobacteria	o__C00003060	f__C00003106	g__C00003106	s__C00003106 sp001751015
CompleteBin_CS01.415	257_1	d__Bacteria	p__Desulfobacterota	c__Desulfobacteria	o__C00003060	f__C00003106	g__C00003106	s__C00003106 sp001751015
CompleteBin_CS01.491	257_1	d__Bacteria	p__Desulfobacterota	c__Desulfobacteria	o__C00003060	f__C00003106	g__C00003106	s__C00003106 sp001751015
CompleteBin_CS01.661	257_1	d__Bacteria	p__Desulfobacterota	c__Desulfobacteria	o__C00003060	f__C00003106	g__C00003106	s__C00003106 sp001751015
CompleteBin_CS01.778	257_1	d__Bacteria	p__Desulfobacterota	c__Desulfobacteria	o__C00003060	f__C00003106	g__C00003106	s__C00003106 sp001751015
MetaBAT2_CS01_bin.114	257_1	d__Bacteria	p__Desulfobacterota	c__Desulfobacteria	o__C00003060	f__C00003106	g__C00003106	s__C00003106 sp001751015
SemiBin2_CS01_SemiBin.68	257_1	d__Bacteria	p__Desulfobacterota	c__Desulfobacteria	o__C00003060	f__C00003106	g__C00003106	s__C00003106 sp001751015
CompleteBin_CS01.1403	258_1	d__Bacteria	p__Desulfobacterota	c__Desulfobulbia	o__Desulfobulbales	f__Desulfurivibrionaceae	g__DAOVYS01	s__
CompleteBin_CS01.324	258_1	d__Bacteria	p__Desulfobacterota	c__Desulfobulbia	o__Desulfobulbales	f__Desulfurivibrionaceae	g__DAOVYS01	s__
CompleteBin_CS01.450	258_1	d__Bacteria	p__Desulfobacterota	c__Desulfobulbia	o__Desulfobulbales	f__Desulfurivibrionaceae	g__DAOVYS01	s__
CompleteBin_CS01.509	258_1	d__Bacteria	p__Desulfobacterota	c__Desulfobulbia	o__Desulfobulbales	f__Desulfurivibrionaceae	g__DAOVYS01	s__
CONCOCT_CS03_bin.31	259_1	d__Bacteria	p__Desulfobacterota	c__Desulfobacteria	o__Desulfobacterales	f__ETH-SRB1	g__B13-G4	s__B13-G4 sp019309665
CompleteBin_CS03.619	259_1	d__Bacteria	p__Desulfobacterota	c__Desulfobacteria	o__Desulfobacterales	f__ETH-SRB1	g__B13-G4	s__B13-G4 sp019309665
CONCOCT_CS08_bin.6	259_2	d__Bacteria	p__Desulfobacterota	c__Desulfobacteria	o__Desulfobacterales	f__ETH-SRB1	g__B13-G4	s__
ComeBin_CS08_bin.237864	259_2	d__Bacteria	p__Desulfobacterota	c__Desulfobacteria	o__Desulfobacterales	f__ETH-SRB1	g__B13-G4	s__
CompleteBin_CS08.408	259_2	d__Bacteria	p__Desulfobacterota	c__Desulfobacteria	o__Desulfobacterales	f__ETH-SRB1	g__B13-G4	s__
VAMB_CS08_bin.16829	259_2	d__Bacteria	p__Desulfobacterota	c__Desulfobacteria	o__Desulfobacterales	f__ETH-SRB1	g__B13-G4	s__
CONCOCT_CS12_bin.260	259_3	d__Bacteria	p__Desulfobacterota	c__Desulfobacteria	o__Desulfobacterales	f__ETH-SRB1	g__B13-G4	s__B13-G4 sp019309665
ComeBin_CS12_bin.97402	259_3	d__Bacteria	p__Desulfobacterota	c__Desulfobacteria	o__Desulfobacterales	f__ETH-SRB1	g__B13-G4	s__B13-G4 sp019309665
CompleteBin_CS12.47	259_3	d__Bacteria	p__Desulfobacterota	c__Desulfobacteria	o__Desulfobacterales	f__ETH-SRB1	g__B13-G4	s__B13-G4 sp019309665
CompleteBin_CS12.506	259_3	d__Bacteria	p__Desulfobacterota	c__Desulfobacteria	o__Desulfobacterales	f__ETH-SRB1	g__B13-G4	s__B13-G4 sp019309665
VAMB_CS12_bin.15074	259_3	d__Bacteria	p__Desulfobacterota	c__Desulfobacteria	o__Desulfobacterales	f__ETH-SRB1	g__B13-G4	s__B13-G4 sp019309665
CompleteBin_CS01.391	259_4	d__Bacteria	p__Desulfobacterota	c__Desulfobacteria	o__Desulfobacterales	f__ETH-SRB1	g__B13-G4	s__B13-G4 sp019309665
VAMB_CS10_bin.10848	259_5	d__Bacteria	p__Desulfobacterota	c__Desulfobacteria	o__Desulfobacterales	f__ETH-SRB1	g__B13-G4	s__
ComeBin_CS08_bin.121275	26_1	d__Bacteria	p__Pseudomonadota	c__Alphaproteobacteria	o__Rhizobiales	f__Methyloligellaceae	g__UBA2767	s__
CompleteBin_CS08.222	26_1	d__Bacteria	p__Pseudomonadota	c__Alphaproteobacteria	o__Rhizobiales	f__Methyloligellaceae	g__UBA2767	s__
MetaBAT2_CS08_bin.4	26_1	d__Bacteria	p__Pseudomonadota	c__Alphaproteobacteria	o__Rhizobiales	f__Methyloligellaceae	g__UBA2767	s__
ComeBin_CS01_bin.210722	260_1	d__Bacteria	p__Desulfobacterota	c__Desulfobacteria	o__Desulfobacterales	f__ETH-SRB1	g__ETH-SRB1	s__
CompleteBin_CS01.311	260_1	d__Bacteria	p__Desulfobacterota	c__Desulfobacteria	o__Desulfobacterales	f__ETH-SRB1	g__ETH-SRB1	s__
CompleteBin_CS01.441	260_1	d__Bacteria	p__Desulfobacterota	c__Desulfobacteria	o__Desulfobacterales	f__ETH-SRB1	g__ETH-SRB1	s__
CompleteBin_CS01.442	260_1	d__Bacteria	p__Desulfobacterota	c__Desulfobacteria	o__Desulfobacterales	f__ETH-SRB1	g__ETH-SRB1	s__
CONCOCT_CS08_bin.16	261_1	d__Bacteria	p__Desulfobacterota	c__Desulfobacteria	o__Desulfobacterales	f__ETH-SRB1	g__Desulfaltia	s__Desulfaltia sp028571455
ComeBin_CS08_bin.156364	261_1	d__Bacteria	p__Desulfobacterota	c__Desulfobacteria	o__Desulfobacterales	f__ETH-SRB1	g__Desulfaltia	s__Desulfaltia sp028571455
CompleteBin_CS08.249	261_1	d__Bacteria	p__Desulfobacterota	c__Desulfobacteria	o__Desulfobacterales	f__ETH-SRB1	g__Desulfaltia	s__Desulfaltia sp028571455
VAMB_CS08_bin.18239	261_1	d__Bacteria	p__Desulfobacterota	c__Desulfobacteria	o__Desulfobacterales	f__ETH-SRB1	g__Desulfaltia	s__Desulfaltia sp028571455
CONCOCT_CS12_bin.75	261_2	d__Bacteria	p__Desulfobacterota	c__Desulfobacteria	o__Desulfobacterales	f__ETH-SRB1	g__Desulfaltia	s__
ComeBin_CS12_bin.87976	261_2	d__Bacteria	p__Desulfobacterota	c__Desulfobacteria	o__Desulfobacterales	f__ETH-SRB1	g__Desulfaltia	s__
CompleteBin_CS12.112	261_2	d__Bacteria	p__Desulfobacterota	c__Desulfobacteria	o__Desulfobacterales	f__ETH-SRB1	g__Desulfaltia	s__
CompleteBin_CS12.339	261_2	d__Bacteria	p__Desulfobacterota	c__Desulfobacteria	o__Desulfobacterales	f__ETH-SRB1	g__Desulfaltia	s__
VAMB_CS12_bin.13502	261_2	d__Bacteria	p__Desulfobacterota	c__Desulfobacteria	o__Desulfobacterales	f__ETH-SRB1	g__Desulfaltia	s__
CompleteBin_CS01.276	261_3	d__Bacteria	p__Desulfobacterota	c__Desulfobacteria	o__Desulfobacterales	f__ETH-SRB1	g__Desulfaltia	s__
CompleteBin_CS03.86	261_4	d__Bacteria	p__Desulfobacterota	c__Desulfobacteria	o__Desulfobacterales	f__ETH-SRB1	g__Desulfaltia	s__Desulfaltia sp028571455
CONCOCT_CS08_bin.195	262_1	d__Bacteria	p__Desulfobacterota	c__Desulfobacteria	o__Desulfobacterales	f__B30-G6	g__B30-G6	s__B30-G6 sp003647375
CompleteBin_CS08.234	262_1	d__Bacteria	p__Desulfobacterota	c__Desulfobacteria	o__Desulfobacterales	f__B30-G6	g__B30-G6	s__B30-G6 sp003647375
CONCOCT_CS10_bin.178	262_2	d__Bacteria	p__Desulfobacterota	c__Desulfobacteria	o__Desulfobacterales	f__B30-G6	g__B30-G6	s__
ComeBin_CS10_bin.131593	262_2	d__Bacteria	p__Desulfobacterota	c__Desulfobacteria	o__Desulfobacterales	f__B30-G6	g__B30-G6	s__
CompleteBin_CS10.305	262_2	d__Bacteria	p__Desulfobacterota	c__Desulfobacteria	o__Desulfobacterales	f__B30-G6	g__B30-G6	s__
CONCOCT_CS12_bin.223	262_3	d__Bacteria	p__Desulfobacterota	c__Desulfobacteria	o__Desulfobacterales	f__B30-G6	g__B30-G6	s__
ComeBin_CS12_bin.132426	262_3	d__Bacteria	p__Desulfobacterota	c__Desulfobacteria	o__Desulfobacterales	f__B30-G6	g__B30-G6	s__
CompleteBin_CS12.319	262_3	d__Bacteria	p__Desulfobacterota	c__Desulfobacteria	o__Desulfobacterales	f__B30-G6	g__B30-G6	s__
MetaBAT2_CS12_bin.15	262_3	d__Bacteria	p__Desulfobacterota	c__Desulfobacteria	o__Desulfobacterales	f__B30-G6	g__B30-G6	s__
VAMB_CS12_bin.13652	262_3	d__Bacteria	p__Desulfobacterota	c__Desulfobacteria	o__Desulfobacterales	f__B30-G6	g__B30-G6	s__
ComeBin_CS08_bin.82493	263_1	d__Bacteria	p__Desulfobacterota	c__Desulfobacteria	o__Desulfobacterales	f__JAFDCJ01	g__JAFDCJ01	s__
CompleteBin_CS08.104	263_1	d__Bacteria	p__Desulfobacterota	c__Desulfobacteria	o__Desulfobacterales	f__JAFDCJ01	g__JAFDCJ01	s__
MetaBAT2_CS08_bin.116	263_1	d__Bacteria	p__Desulfobacterota	c__Desulfobacteria	o__Desulfobacterales	f__JAFDCJ01	g__JAFDCJ01	s__
CONCOCT_CS01_bin.102	264_1	d__Bacteria	p__Desulfobacterota	c__Desulfobacteria	o__Desulfobacterales	f__JAFDCJ01	g__JAFDCJ01	s__
ComeBin_CS01_bin.248494	264_1	d__Bacteria	p__Desulfobacterota	c__Desulfobacteria	o__Desulfobacterales	f__JAFDCJ01	g__JAFDCJ01	s__
CompleteBin_CS01.423	264_1	d__Bacteria	p__Desulfobacterota	c__Desulfobacteria	o__Desulfobacterales	f__JAFDCJ01	g__JAFDCJ01	s__
CompleteBin_CS01.643	264_1	d__Bacteria	p__Desulfobacterota	c__Desulfobacteria	o__Desulfobacterales	f__JAFDCJ01	g__JAFDCJ01	s__
CompleteBin_CS01.683	264_1	d__Bacteria	p__Desulfobacterota	c__Desulfobacteria	o__Desulfobacterales	f__JAFDCJ01	g__JAFDCJ01	s__
CompleteBin_CS01.869	264_1	d__Bacteria	p__Desulfobacterota	c__Desulfobacteria	o__Desulfobacterales	f__JAFDCJ01	g__JAFDCJ01	s__
VAMB_CS01_bin.15675	264_1	d__Bacteria	p__Desulfobacterota	c__Desulfobacteria	o__Desulfobacterales	f__JAFDCJ01	g__JAFDCJ01	s__
CONCOCT_CS12_bin.114	264_2	d__Bacteria	p__Desulfobacterota	c__Desulfobacteria	o__Desulfobacterales	f__JAFDCJ01	g__JAFDCJ01	s__
ComeBin_CS12_bin.157606	264_2	d__Bacteria	p__Desulfobacterota	c__Desulfobacteria	o__Desulfobacterales	f__JAFDCJ01	g__JAFDCJ01	s__
CompleteBin_CS12.206	264_2	d__Bacteria	p__Desulfobacterota	c__Desulfobacteria	o__Desulfobacterales	f__JAFDCJ01	g__JAFDCJ01	s__
VAMB_CS12_bin.12343	264_2	d__Bacteria	p__Desulfobacterota	c__Desulfobacteria	o__Desulfobacterales	f__JAFDCJ01	g__JAFDCJ01	s__
CompleteBin_CS05.330	264_3	d__Bacteria	p__Desulfobacterota	c__Desulfobacteria	o__Desulfobacterales	f__JAFDCJ01	g__JAFDCJ01	s__
CompleteBin_CS05.430	264_3	d__Bacteria	p__Desulfobacterota	c__Desulfobacteria	o__Desulfobacterales	f__JAFDCJ01	g__JAFDCJ01	s__
CONCOCT_CS10_bin.209	264_4	d__Bacteria	p__Desulfobacterota	c__Desulfobacteria	o__Desulfobacterales	f__JAFDCJ01	g__JAFDCJ01	s__JAFDCJ01 sp019310665
ComeBin_CS10_bin.245153	264_4	d__Bacteria	p__Desulfobacterota	c__Desulfobacteria	o__Desulfobacterales	f__JAFDCJ01	g__JAFDCJ01	s__JAFDCJ01 sp019310665
CompleteBin_CS10.1209	264_4	d__Bacteria	p__Desulfobacterota	c__Desulfobacteria	o__Desulfobacterales	f__JAFDCJ01	g__JAFDCJ01	s__JAFDCJ01 sp019310665
CompleteBin_CS10.695	264_4	d__Bacteria	p__Desulfobacterota	c__Desulfobacteria	o__Desulfobacterales	f__JAFDCJ01	g__JAFDCJ01	s__JAFDCJ01 sp019310665
VAMB_CS10_bin.11827	264_4	d__Bacteria	p__Desulfobacterota	c__Desulfobacteria	o__Desulfobacterales	f__JAFDCJ01	g__JAFDCJ01	s__JAFDCJ01 sp019310665
CompleteBin_CS08.253	264_5	d__Bacteria	p__Desulfobacterota	c__Desulfobacteria	o__Desulfobacterales	f__JAFDCJ01	g__JAFDCJ01	s__
ComeBin_CS10_bin.100517	265_1	d__Bacteria	p__Desulfobacterota	c__Desulfobacteria	o__Desulfobacterales	f__JAFDCJ01	g__JAFDCJ01	s__
CompleteBin_CS10.345	265_1	d__Bacteria	p__Desulfobacterota	c__Desulfobacteria	o__Desulfobacterales	f__JAFDCJ01	g__JAFDCJ01	s__
CompleteBin_CS05.227	265_2	d__Bacteria	p__Desulfobacterota	c__Desulfobacteria	o__Desulfobacterales	f__JAFDCJ01	g__JAFDCJ01	s__
CompleteBin_CS08.282	265_3	d__Bacteria	p__Desulfobacterota	c__Desulfobacteria	o__Desulfobacterales	f__JAFDCJ01	g__JAFDCJ01	s__
CompleteBin_CS08.210	266_1	d__Bacteria	p__Desulfobacterota	c__Desulfobacteria	o__Desulfobacterales	f__JAFDCJ01	g__JAFDCJ01	s__
CompleteBin_CS08.74	266_1	d__Bacteria	p__Desulfobacterota	c__Desulfobacteria	o__Desulfobacterales	f__JAFDCJ01	g__JAFDCJ01	s__
CompleteBin_CS05.228	266_2	d__Bacteria	p__Desulfobacterota	c__Desulfobacteria	o__Desulfobacterales	f__JAFDCJ01	g__JAFDCJ01	s__
CompleteBin_CS05.293	267_1	d__Bacteria	p__Desulfobacterota	c__Desulfobacteria	o__Desulfobacterales	f__JAHEIW01	g__JAHEIW01	s__
CompleteBin_CS05.298	267_1	d__Bacteria	p__Desulfobacterota	c__Desulfobacteria	o__Desulfobacterales	f__JAHEIW01	g__JAHEIW01	s__
CompleteBin_CS05.443	267_2	d__Bacteria	p__Desulfobacterota	c__Desulfobacteria	o__Desulfobacterales	f__JAHEIW01	g__JAHEIW01	s__
CONCOCT_CS05_bin.48	268_1	d__Bacteria	p__Desulfobacterota	c__Desulfobacteria	o__Desulfobacterales	f__JAHEIW01	g__JAHEIW01	s__
ComeBin_CS05_bin.91145	268_1	d__Bacteria	p__Desulfobacterota	c__Desulfobacteria	o__Desulfobacterales	f__JAHEIW01	g__JAHEIW01	s__
CompleteBin_CS05.136	268_1	d__Bacteria	p__Desulfobacterota	c__Desulfobacteria	o__Desulfobacterales	f__JAHEIW01	g__JAHEIW01	s__
CompleteBin_CS05.750	268_1	d__Bacteria	p__Desulfobacterota	c__Desulfobacteria	o__Desulfobacterales	f__JAHEIW01	g__JAHEIW01	s__
MetaBAT2_CS05_bin.68	268_1	d__Bacteria	p__Desulfobacterota	c__Desulfobacteria	o__Desulfobacterales	f__JAHEIW01	g__JAHEIW01	s__
CONCOCT_CS08_bin.229	268_2	d__Bacteria	p__Desulfobacterota	c__Desulfobacteria	o__Desulfobacterales	f__JAHEIW01	g__JAHEIW01	s__
ComeBin_CS08_bin.14855	268_2	d__Bacteria	p__Desulfobacterota	c__Desulfobacteria	o__Desulfobacterales	f__JAHEIW01	g__JAHEIW01	s__
CompleteBin_CS08.458	268_2	d__Bacteria	p__Desulfobacterota	c__Desulfobacteria	o__Desulfobacterales	f__JAHEIW01	g__JAHEIW01	s__
MetaBAT2_CS08_bin.165	268_2	d__Bacteria	p__Desulfobacterota	c__Desulfobacteria	o__Desulfobacterales	f__JAHEIW01	g__JAHEIW01	s__
SemiBin2_CS08_SemiBin.51	268_2	d__Bacteria	p__Desulfobacterota	c__Desulfobacteria	o__Desulfobacterales	f__JAHEIW01	g__JAHEIW01	s__
VAMB_CS08_bin.25990	268_2	d__Bacteria	p__Desulfobacterota	c__Desulfobacteria	o__Desulfobacterales	f__JAHEIW01	g__JAHEIW01	s__
CONCOCT_CS10_bin.160	269_1	d__Bacteria	p__Desulfobacterota	c__Desulfobacteria	o__Desulfobacterales	f__B30-G6	g__JAJDNW01	s__JAJDNW01 sp019313725
ComeBin_CS10_bin.49084	269_1	d__Bacteria	p__Desulfobacterota	c__Desulfobacteria	o__Desulfobacterales	f__B30-G6	g__JAJDNW01	s__JAJDNW01 sp019313725
CompleteBin_CS10.266	269_1	d__Bacteria	p__Desulfobacterota	c__Desulfobacteria	o__Desulfobacterales	f__B30-G6	g__JAJDNW01	s__JAJDNW01 sp019313725
CompleteBin_CS10.623	269_1	d__Bacteria	p__Desulfobacterota	c__Desulfobacteria	o__Desulfobacterales	f__B30-G6	g__JAJDNW01	s__JAJDNW01 sp019313725
MetaBAT2_CS10_bin.117	269_1	d__Bacteria	p__Desulfobacterota	c__Desulfobacteria	o__Desulfobacterales	f__B30-G6	g__JAJDNW01	s__JAJDNW01 sp019313725
SemiBin2_CS10_SemiBin.102	269_1	d__Bacteria	p__Desulfobacterota	c__Desulfobacteria	o__Desulfobacterales	f__B30-G6	g__JAJDNW01	s__JAJDNW01 sp019313725
VAMB_CS10_bin.12272	269_1	d__Bacteria	p__Desulfobacterota	c__Desulfobacteria	o__Desulfobacterales	f__B30-G6	g__JAJDNW01	s__JAJDNW01 sp019313725
CONCOCT_CS01_bin.176	27_1	d__Bacteria	p__Chloroflexota	c__Anaerolineae	o__B4-G1	f__SLSP01	g__G713	s__
ComeBin_CS01_bin.110814	27_1	d__Bacteria	p__Chloroflexota	c__Anaerolineae	o__B4-G1	f__SLSP01	g__G713	s__
CompleteBin_CS01.32	27_1	d__Bacteria	p__Chloroflexota	c__Anaerolineae	o__B4-G1	f__SLSP01	g__G713	s__
CompleteBin_CS01.489	27_1	d__Bacteria	p__Chloroflexota	c__Anaerolineae	o__B4-G1	f__SLSP01	g__G713	s__
CompleteBin_CS01.633	27_1	d__Bacteria	p__Chloroflexota	c__Anaerolineae	o__B4-G1	f__SLSP01	g__G713	s__
ComeBin_CS01_bin.209399	270_1	d__Bacteria	p__Desulfobacterota	c__Desulfobacteria	o__Desulfobacterales	f__BuS5	g__DAOWMW01	s__
CompleteBin_CS01.246	270_1	d__Bacteria	p__Desulfobacterota	c__Desulfobacteria	o__Desulfobacterales	f__BuS5	g__DAOWMW01	s__
CompleteBin_CS01.554	270_1	d__Bacteria	p__Desulfobacterota	c__Desulfobacteria	o__Desulfobacterales	f__BuS5	g__DAOWMW01	s__
CompleteBin_CS01.729	270_1	d__Bacteria	p__Desulfobacterota	c__Desulfobacteria	o__Desulfobacterales	f__BuS5	g__DAOWMW01	s__
CONCOCT_CS01_bin.123	271_1	d__Archaea	p__Thermoplasmatota	c__EX4484-6	o__EX4484-6	f__EX4484-6	g__JAGLEG01	s__
ComeBin_CS01_bin.166425	271_1	d__Archaea	p__Thermoplasmatota	c__EX4484-6	o__EX4484-6	f__EX4484-6	g__JAGLEG01	s__
CompleteBin_CS01.630	271_1	d__Archaea	p__Thermoplasmatota	c__EX4484-6	o__EX4484-6	f__EX4484-6	g__JAGLEG01	s__
CONCOCT_CS03_bin.82	272_0	Unclassified Bacteria
ComeBin_CS08_bin.247247	273_1	d__Bacteria	p__Desulfobacterota	c__Desulfobacteria	o__Desulfobacterales	f__	g__	s__
CompleteBin_CS08.287	273_1	d__Bacteria	p__Desulfobacterota	c__Desulfobacteria	o__Desulfobacterales	f__	g__	s__
CompleteBin_CS08.361	273_1	d__Bacteria	p__Desulfobacterota	c__Desulfobacteria	o__Desulfobacterales	f__	g__	s__
CompleteBin_CS01.140	274_1	d__Bacteria	p__UBA10199	c__UBA10199	o__2-02-FULL-44-16	f__JAAZCA01	g__	s__
CompleteBin_CS01.707	274_1	d__Bacteria	p__UBA10199	c__UBA10199	o__2-02-FULL-44-16	f__JAAZCA01	g__	s__
CompleteBin_CS01.923	275_1	d__Bacteria	p__Fermentibacterota	c__JAFGKV01	o__JAFGKV01	f__JAFGKV01	g__	s__
CompleteBin_CS01.927	275_1	d__Bacteria	p__Fermentibacterota	c__JAFGKV01	o__JAFGKV01	f__JAFGKV01	g__	s__
CompleteBin_CS01.96	275_1	d__Bacteria	p__Fermentibacterota	c__JAFGKV01	o__JAFGKV01	f__JAFGKV01	g__	s__
CONCOCT_CS01_bin.66	276_1	d__Archaea	p__Halobacteriota	c__Methanosarcinia	o__Methanotrichales	f__Methanotrichaceae	g__UBA204	s__UBA204 sp030611205
ComeBin_CS01_bin.178408	276_1	d__Archaea	p__Halobacteriota	c__Methanosarcinia	o__Methanotrichales	f__Methanotrichaceae	g__UBA204	s__UBA204 sp030611205
CompleteBin_CS01.499	276_1	d__Archaea	p__Halobacteriota	c__Methanosarcinia	o__Methanotrichales	f__Methanotrichaceae	g__UBA204	s__UBA204 sp030611205
CompleteBin_CS01.655	276_1	d__Archaea	p__Halobacteriota	c__Methanosarcinia	o__Methanotrichales	f__Methanotrichaceae	g__UBA204	s__UBA204 sp030611205
ComeBin_CS05_bin.175836	277_0	d__Bacteria	p__Pseudomonadota	c__Gammaproteobacteria	o__GCA-001735895	f__GCA-001735895	g__GCA-001735895	s__
CompleteBin_CS05.438	278_0	d__Bacteria	p__Chloroflexota	c__Anaerolineae	o__Promineifilales	f__Promineifilaceae	g__	s__
CONCOCT_CS08_bin.15	279_1	d__Bacteria	p__Pseudomonadota	c__Gammaproteobacteria	o__Arenicellales	f__Poriferihabitantaceae	g__JAAELZ01	s__
ComeBin_CS08_bin.164416	279_1	d__Bacteria	p__Pseudomonadota	c__Gammaproteobacteria	o__Arenicellales	f__Poriferihabitantaceae	g__JAAELZ01	s__
CompleteBin_CS08.297	279_1	d__Bacteria	p__Pseudomonadota	c__Gammaproteobacteria	o__Arenicellales	f__Poriferihabitantaceae	g__JAAELZ01	s__
CONCOCT_CS08_bin.242	28_1	d__Bacteria	p__Acidobacteriota	c__UBA6911	o__RPQK01	f__RPQK01	g__G020350445	s__G020350445 sp030614585
ComeBin_CS08_bin.193799	28_1	d__Bacteria	p__Acidobacteriota	c__UBA6911	o__RPQK01	f__RPQK01	g__G020350445	s__G020350445 sp030614585
CompleteBin_CS08.335	28_1	d__Bacteria	p__Acidobacteriota	c__UBA6911	o__RPQK01	f__RPQK01	g__G020350445	s__G020350445 sp030614585
CONCOCT_CS05_bin.47	28_2	d__Bacteria	p__Acidobacteriota	c__UBA6911	o__RPQK01	f__RPQK01	g__G020350445	s__G020350445 sp030614585
ComeBin_CS05_bin.68886	28_2	d__Bacteria	p__Acidobacteriota	c__UBA6911	o__RPQK01	f__RPQK01	g__G020350445	s__G020350445 sp030614585
MetaBAT2_CS05_bin.25	28_2	d__Bacteria	p__Acidobacteriota	c__UBA6911	o__RPQK01	f__RPQK01	g__G020350445	s__G020350445 sp030614585
VAMB_CS05_bin.38528	28_2	d__Bacteria	p__Acidobacteriota	c__UBA6911	o__RPQK01	f__RPQK01	g__G020350445	s__G020350445 sp030614585
CONCOCT_CS08_bin.144	280_1	d__Bacteria	p__Actinomycetota	c__Humimicrobiia	o__Humimicrobiales	f__Humimicrobiaceae	g__M55B120	s__
ComeBin_CS08_bin.289116	280_1	d__Bacteria	p__Actinomycetota	c__Humimicrobiia	o__Humimicrobiales	f__Humimicrobiaceae	g__M55B120	s__
CompleteBin_CS08.451	280_1	d__Bacteria	p__Actinomycetota	c__Humimicrobiia	o__Humimicrobiales	f__Humimicrobiaceae	g__M55B120	s__
CompleteBin_CS12.12	281_0	d__Bacteria	p__Actinomycetota	c__Humimicrobiia	o__Humimicrobiales	f__Humimicrobiaceae	g__M55B120	s__
CONCOCT_CS05_bin.154	282_1	d__Bacteria	p__Desulfobacterota	c__WTBG01	o__WTBG01	f__WTBG01	g__	s__
ComeBin_CS05_bin.43560	282_1	d__Bacteria	p__Desulfobacterota	c__WTBG01	o__WTBG01	f__WTBG01	g__	s__
CompleteBin_CS05.147	282_1	d__Bacteria	p__Desulfobacterota	c__WTBG01	o__WTBG01	f__WTBG01	g__	s__
SemiBin2_CS05_SemiBin.88	282_1	d__Bacteria	p__Desulfobacterota	c__WTBG01	o__WTBG01	f__WTBG01	g__	s__
CompleteBin_CS03.489	283_1	d__Bacteria	p__Desulfobacterota	c__WTBG01	o__WTBG01	f__WTBG01	g__WTBG01	s__
CompleteBin_CS03.653	283_1	d__Bacteria	p__Desulfobacterota	c__WTBG01	o__WTBG01	f__WTBG01	g__WTBG01	s__
CONCOCT_CS01_bin.38	283_2	d__Bacteria	p__Desulfobacterota	c__WTBG01	o__WTBG01	f__WTBG01	g__WTBG01	s__WTBG01 sp013139225
ComeBin_CS01_bin.34729	283_2	d__Bacteria	p__Desulfobacterota	c__WTBG01	o__WTBG01	f__WTBG01	g__WTBG01	s__WTBG01 sp013139225
CompleteBin_CS01.250	283_2	d__Bacteria	p__Desulfobacterota	c__WTBG01	o__WTBG01	f__WTBG01	g__WTBG01	s__WTBG01 sp013139225
CompleteBin_CS01.252	283_2	d__Bacteria	p__Desulfobacterota	c__WTBG01	o__WTBG01	f__WTBG01	g__WTBG01	s__WTBG01 sp013139225
CompleteBin_CS01.8	283_2	d__Bacteria	p__Desulfobacterota	c__WTBG01	o__WTBG01	f__WTBG01	g__WTBG01	s__WTBG01 sp013139225
MetaBAT2_CS01_bin.46	283_2	d__Bacteria	p__Desulfobacterota	c__WTBG01	o__WTBG01	f__WTBG01	g__WTBG01	s__WTBG01 sp013139225
SemiBin2_CS01_SemiBin.138	283_2	d__Bacteria	p__Desulfobacterota	c__WTBG01	o__WTBG01	f__WTBG01	g__WTBG01	s__WTBG01 sp013139225
VAMB_CS01_bin.21781	283_2	d__Bacteria	p__Desulfobacterota	c__WTBG01	o__WTBG01	f__WTBG01	g__WTBG01	s__WTBG01 sp013139225
CONCOCT_CS12_bin.154	283_3	d__Bacteria	p__Desulfobacterota	c__WTBG01	o__WTBG01	f__WTBG01	g__WTBG01	s__WTBG01 sp013139225
ComeBin_CS12_bin.56082	283_3	d__Bacteria	p__Desulfobacterota	c__WTBG01	o__WTBG01	f__WTBG01	g__WTBG01	s__WTBG01 sp013139225
CompleteBin_CS12.110	283_3	d__Bacteria	p__Desulfobacterota	c__WTBG01	o__WTBG01	f__WTBG01	g__WTBG01	s__WTBG01 sp013139225
SemiBin2_CS12_SemiBin.175	283_3	d__Bacteria	p__Desulfobacterota	c__WTBG01	o__WTBG01	f__WTBG01	g__WTBG01	s__WTBG01 sp013139225
VAMB_CS12_bin.14429	283_3	d__Bacteria	p__Desulfobacterota	c__WTBG01	o__WTBG01	f__WTBG01	g__WTBG01	s__WTBG01 sp013139225
CONCOCT_CS05_bin.85	283_4	d__Bacteria	p__Desulfobacterota	c__WTBG01	o__WTBG01	f__WTBG01	g__WTBG01	s__WTBG01 sp013139225
ComeBin_CS05_bin.9773	283_4	d__Bacteria	p__Desulfobacterota	c__WTBG01	o__WTBG01	f__WTBG01	g__WTBG01	s__WTBG01 sp013139225
CompleteBin_CS05.440	283_4	d__Bacteria	p__Desulfobacterota	c__WTBG01	o__WTBG01	f__WTBG01	g__WTBG01	s__WTBG01 sp013139225
CompleteBin_CS05.441	283_4	d__Bacteria	p__Desulfobacterota	c__WTBG01	o__WTBG01	f__WTBG01	g__WTBG01	s__WTBG01 sp013139225
CompleteBin_CS05.568	283_4	d__Bacteria	p__Desulfobacterota	c__WTBG01	o__WTBG01	f__WTBG01	g__WTBG01	s__WTBG01 sp013139225
MetaBAT2_CS05_bin.129	283_4	d__Bacteria	p__Desulfobacterota	c__WTBG01	o__WTBG01	f__WTBG01	g__WTBG01	s__WTBG01 sp013139225
SemiBin2_CS05_SemiBin.26	283_4	d__Bacteria	p__Desulfobacterota	c__WTBG01	o__WTBG01	f__WTBG01	g__WTBG01	s__WTBG01 sp013139225
VAMB_CS05_bin.25364	283_4	d__Bacteria	p__Desulfobacterota	c__WTBG01	o__WTBG01	f__WTBG01	g__WTBG01	s__WTBG01 sp013139225
CONCOCT_CS10_bin.50	283_5	d__Bacteria	p__Desulfobacterota	c__WTBG01	o__WTBG01	f__WTBG01	g__WTBG01	s__WTBG01 sp013139225
ComeBin_CS10_bin.95776	283_5	d__Bacteria	p__Desulfobacterota	c__WTBG01	o__WTBG01	f__WTBG01	g__WTBG01	s__WTBG01 sp013139225
CompleteBin_CS10.707	283_5	d__Bacteria	p__Desulfobacterota	c__WTBG01	o__WTBG01	f__WTBG01	g__WTBG01	s__WTBG01 sp013139225
MetaBAT2_CS10_bin.109	283_5	d__Bacteria	p__Desulfobacterota	c__WTBG01	o__WTBG01	f__WTBG01	g__WTBG01	s__WTBG01 sp013139225
SemiBin2_CS10_SemiBin.172	283_5	d__Bacteria	p__Desulfobacterota	c__WTBG01	o__WTBG01	f__WTBG01	g__WTBG01	s__WTBG01 sp013139225
VAMB_CS10_bin.17280	283_5	d__Bacteria	p__Desulfobacterota	c__WTBG01	o__WTBG01	f__WTBG01	g__WTBG01	s__WTBG01 sp013139225
CONCOCT_CS08_bin.210	283_6	d__Bacteria	p__Desulfobacterota	c__WTBG01	o__WTBG01	f__WTBG01	g__WTBG01	s__WTBG01 sp013139225
ComeBin_CS08_bin.58543	283_6	d__Bacteria	p__Desulfobacterota	c__WTBG01	o__WTBG01	f__WTBG01	g__WTBG01	s__WTBG01 sp013139225
CompleteBin_CS08.101	283_6	d__Bacteria	p__Desulfobacterota	c__WTBG01	o__WTBG01	f__WTBG01	g__WTBG01	s__WTBG01 sp013139225
MetaBAT2_CS08_bin.53	283_6	d__Bacteria	p__Desulfobacterota	c__WTBG01	o__WTBG01	f__WTBG01	g__WTBG01	s__WTBG01 sp013139225
SemiBin2_CS08_SemiBin.121	283_6	d__Bacteria	p__Desulfobacterota	c__WTBG01	o__WTBG01	f__WTBG01	g__WTBG01	s__WTBG01 sp013139225
VAMB_CS08_bin.15646	283_6	d__Bacteria	p__Desulfobacterota	c__WTBG01	o__WTBG01	f__WTBG01	g__WTBG01	s__WTBG01 sp013139225
CONCOCT_CS03_bin.70	284_1	d__Bacteria	p__Desulfobacterota	c__Desulfobulbia	o__Desulfobulbales	f__Desulfurivibrionaceae	g__Desulfobia	s__Desulfobia sp030608985
ComeBin_CS03_bin.145108	284_1	d__Bacteria	p__Desulfobacterota	c__Desulfobulbia	o__Desulfobulbales	f__Desulfurivibrionaceae	g__Desulfobia	s__Desulfobia sp030608985
CompleteBin_CS03.399	284_1	d__Bacteria	p__Desulfobacterota	c__Desulfobulbia	o__Desulfobulbales	f__Desulfurivibrionaceae	g__Desulfobia	s__Desulfobia sp030608985
MetaBAT2_CS03_bin.21	284_1	d__Bacteria	p__Desulfobacterota	c__Desulfobulbia	o__Desulfobulbales	f__Desulfurivibrionaceae	g__Desulfobia	s__Desulfobia sp030608985
ComeBin_CS05_bin.25117	284_2	d__Bacteria	p__Desulfobacterota	c__Desulfobulbia	o__Desulfobulbales	f__Desulfurivibrionaceae	g__Desulfobia	s__Desulfobia sp030608985
CompleteBin_CS05.108	284_2	d__Bacteria	p__Desulfobacterota	c__Desulfobulbia	o__Desulfobulbales	f__Desulfurivibrionaceae	g__Desulfobia	s__Desulfobia sp030608985
MetaBAT2_CS05_bin.13	284_2	d__Bacteria	p__Desulfobacterota	c__Desulfobulbia	o__Desulfobulbales	f__Desulfurivibrionaceae	g__Desulfobia	s__Desulfobia sp030608985
SemiBin2_CS05_SemiBin.55	284_2	d__Bacteria	p__Desulfobacterota	c__Desulfobulbia	o__Desulfobulbales	f__Desulfurivibrionaceae	g__Desulfobia	s__Desulfobia sp030608985
VAMB_CS05_bin.42962	284_2	d__Bacteria	p__Desulfobacterota	c__Desulfobulbia	o__Desulfobulbales	f__Desulfurivibrionaceae	g__Desulfobia	s__Desulfobia sp030608985
ComeBin_CS10_bin.169607	285_1	d__Bacteria	p__Pseudomonadota	c__Gammaproteobacteria	o__BMS3Bbin11	f__BMS3Bbin11	g__BMS3Bbin11	s__
CompleteBin_CS10.339	285_1	d__Bacteria	p__Pseudomonadota	c__Gammaproteobacteria	o__BMS3Bbin11	f__BMS3Bbin11	g__BMS3Bbin11	s__
CompleteBin_CS10.873	285_1	d__Bacteria	p__Pseudomonadota	c__Gammaproteobacteria	o__BMS3Bbin11	f__BMS3Bbin11	g__BMS3Bbin11	s__
CompleteBin_CS08.368	285_2	d__Bacteria	p__Pseudomonadota	c__Gammaproteobacteria	o__BMS3Bbin11	f__BMS3Bbin11	g__BMS3Bbin11	s__
CompleteBin_CS03.418	286_1	d__Bacteria	p__Pseudomonadota	c__Gammaproteobacteria	o__BMS3Bbin11	f__BMS3Bbin11	g__BMS3Bbin11	s__
VAMB_CS03_bin.14446	286_1	d__Bacteria	p__Pseudomonadota	c__Gammaproteobacteria	o__BMS3Bbin11	f__BMS3Bbin11	g__BMS3Bbin11	s__
ComeBin_CS05_bin.184179	286_2	d__Bacteria	p__Pseudomonadota	c__Gammaproteobacteria	o__BMS3Bbin11	f__BMS3Bbin11	g__BMS3Bbin11	s__
CompleteBin_CS08.338	286_3	d__Bacteria	p__Pseudomonadota	c__Gammaproteobacteria	o__BMS3Bbin11	f__BMS3Bbin11	g__BMS3Bbin11	s__
CONCOCT_CS05_bin.156	287_1	d__Bacteria	p__Pseudomonadota	c__Gammaproteobacteria	o__Chromatiales	f__Sedimenticolaceae	g__	s__
CompleteBin_CS05.224	287_1	d__Bacteria	p__Pseudomonadota	c__Gammaproteobacteria	o__Chromatiales	f__Sedimenticolaceae	g__	s__
CONCOCT_CS08_bin.255	288_1	d__Bacteria	p__Pseudomonadota	c__Gammaproteobacteria	o__Chromatiales	f__Sedimenticolaceae	g__	s__
ComeBin_CS08_bin.71754	288_1	d__Bacteria	p__Pseudomonadota	c__Gammaproteobacteria	o__Chromatiales	f__Sedimenticolaceae	g__	s__
CompleteBin_CS08.122	288_1	d__Bacteria	p__Pseudomonadota	c__Gammaproteobacteria	o__Chromatiales	f__Sedimenticolaceae	g__	s__
MetaBAT2_CS08_bin.66	288_1	d__Bacteria	p__Pseudomonadota	c__Gammaproteobacteria	o__Chromatiales	f__Sedimenticolaceae	g__	s__
VAMB_CS08_bin.15006	288_1	d__Bacteria	p__Pseudomonadota	c__Gammaproteobacteria	o__Chromatiales	f__Sedimenticolaceae	g__	s__
CONCOCT_CS10_bin.199	288_2	d__Bacteria	p__Pseudomonadota	c__Gammaproteobacteria	o__Chromatiales	f__Sedimenticolaceae	g__	s__
ComeBin_CS10_bin.113208	288_2	d__Bacteria	p__Pseudomonadota	c__Gammaproteobacteria	o__Chromatiales	f__Sedimenticolaceae	g__	s__
CompleteBin_CS10.2547	288_2	d__Bacteria	p__Pseudomonadota	c__Gammaproteobacteria	o__Chromatiales	f__Sedimenticolaceae	g__	s__
CompleteBin_CS10.347	288_2	d__Bacteria	p__Pseudomonadota	c__Gammaproteobacteria	o__Chromatiales	f__Sedimenticolaceae	g__	s__
CompleteBin_CS10.734	288_2	d__Bacteria	p__Pseudomonadota	c__Gammaproteobacteria	o__Chromatiales	f__Sedimenticolaceae	g__	s__
MetaBAT2_CS10_bin.47	288_2	d__Bacteria	p__Pseudomonadota	c__Gammaproteobacteria	o__Chromatiales	f__Sedimenticolaceae	g__	s__
VAMB_CS10_bin.12761	288_2	d__Bacteria	p__Pseudomonadota	c__Gammaproteobacteria	o__Chromatiales	f__Sedimenticolaceae	g__	s__
CONCOCT_CS01_bin.139	288_3	d__Bacteria	p__Pseudomonadota	c__Gammaproteobacteria	o__Chromatiales	f__Sedimenticolaceae	g__	s__
ComeBin_CS01_bin.52117	288_3	d__Bacteria	p__Pseudomonadota	c__Gammaproteobacteria	o__Chromatiales	f__Sedimenticolaceae	g__	s__
CompleteBin_CS01.322	288_3	d__Bacteria	p__Pseudomonadota	c__Gammaproteobacteria	o__Chromatiales	f__Sedimenticolaceae	g__	s__
MetaBAT2_CS01_bin.65	288_3	d__Bacteria	p__Pseudomonadota	c__Gammaproteobacteria	o__Chromatiales	f__Sedimenticolaceae	g__	s__
VAMB_CS01_bin.15443	288_3	d__Bacteria	p__Pseudomonadota	c__Gammaproteobacteria	o__Chromatiales	f__Sedimenticolaceae	g__	s__
ComeBin_CS05_bin.67444	289_1	d__Bacteria	p__Nitrospirota	c__Thermodesulfovibrionia	o__UBA6902	f__UBA6902	g__	s__
CompleteBin_CS05.211	289_1	d__Bacteria	p__Nitrospirota	c__Thermodesulfovibrionia	o__UBA6902	f__UBA6902	g__	s__
CompleteBin_CS05.212	289_1	d__Bacteria	p__Nitrospirota	c__Thermodesulfovibrionia	o__UBA6902	f__UBA6902	g__	s__
CONCOCT_CS12_bin.11	29_0	d__Bacteria	p__	c__	o__	f__	g__	s__
CONCOCT_CS10_bin.170	290_1	d__Bacteria	p__Desulfobacterota	c__Desulfobulbia	o__Desulfobulbales	f__BM004	g__BM004	s__BM004 sp030621655
ComeBin_CS10_bin.43090	290_1	d__Bacteria	p__Desulfobacterota	c__Desulfobulbia	o__Desulfobulbales	f__BM004	g__BM004	s__BM004 sp030621655
CompleteBin_CS10.356	290_1	d__Bacteria	p__Desulfobacterota	c__Desulfobulbia	o__Desulfobulbales	f__BM004	g__BM004	s__BM004 sp030621655
MetaBAT2_CS10_bin.41	290_1	d__Bacteria	p__Desulfobacterota	c__Desulfobulbia	o__Desulfobulbales	f__BM004	g__BM004	s__BM004 sp030621655
SemiBin2_CS10_SemiBin.96	290_1	d__Bacteria	p__Desulfobacterota	c__Desulfobulbia	o__Desulfobulbales	f__BM004	g__BM004	s__BM004 sp030621655
VAMB_CS10_bin.11432	290_1	d__Bacteria	p__Desulfobacterota	c__Desulfobulbia	o__Desulfobulbales	f__BM004	g__BM004	s__BM004 sp030621655
CONCOCT_CS05_bin.93	290_2	d__Bacteria	p__Desulfobacterota	c__Desulfobulbia	o__Desulfobulbales	f__BM004	g__BM004	s__BM004 sp030621655
ComeBin_CS05_bin.39874	290_2	d__Bacteria	p__Desulfobacterota	c__Desulfobulbia	o__Desulfobulbales	f__BM004	g__BM004	s__BM004 sp030621655
CompleteBin_CS05.134	290_2	d__Bacteria	p__Desulfobacterota	c__Desulfobulbia	o__Desulfobulbales	f__BM004	g__BM004	s__BM004 sp030621655
MetaBAT2_CS05_bin.150	290_2	d__Bacteria	p__Desulfobacterota	c__Desulfobulbia	o__Desulfobulbales	f__BM004	g__BM004	s__BM004 sp030621655
VAMB_CS05_bin.24629	290_2	d__Bacteria	p__Desulfobacterota	c__Desulfobulbia	o__Desulfobulbales	f__BM004	g__BM004	s__BM004 sp030621655
CONCOCT_CS08_bin.225	290_3	d__Bacteria	p__Desulfobacterota	c__Desulfobulbia	o__Desulfobulbales	f__BM004	g__BM004	s__BM004 sp030621655
ComeBin_CS08_bin.6998	290_3	d__Bacteria	p__Desulfobacterota	c__Desulfobulbia	o__Desulfobulbales	f__BM004	g__BM004	s__BM004 sp030621655
CompleteBin_CS08.180	290_3	d__Bacteria	p__Desulfobacterota	c__Desulfobulbia	o__Desulfobulbales	f__BM004	g__BM004	s__BM004 sp030621655
MetaBAT2_CS08_bin.61	290_3	d__Bacteria	p__Desulfobacterota	c__Desulfobulbia	o__Desulfobulbales	f__BM004	g__BM004	s__BM004 sp030621655
SemiBin2_CS08_SemiBin.27	290_3	d__Bacteria	p__Desulfobacterota	c__Desulfobulbia	o__Desulfobulbales	f__BM004	g__BM004	s__BM004 sp030621655
VAMB_CS08_bin.21994	290_3	d__Bacteria	p__Desulfobacterota	c__Desulfobulbia	o__Desulfobulbales	f__BM004	g__BM004	s__BM004 sp030621655
CONCOCT_CS01_bin.208	291_1	d__Bacteria	p__Desulfobacterota	c__Desulfobulbia	o__Desulfobulbales	f__Desulfobulbaceae	g__Electrothrix	s__
ComeBin_CS01_bin.79300	291_1	d__Bacteria	p__Desulfobacterota	c__Desulfobulbia	o__Desulfobulbales	f__Desulfobulbaceae	g__Electrothrix	s__
CompleteBin_CS01.135	291_1	d__Bacteria	p__Desulfobacterota	c__Desulfobulbia	o__Desulfobulbales	f__Desulfobulbaceae	g__Electrothrix	s__
CompleteBin_CS01.342	291_1	d__Bacteria	p__Desulfobacterota	c__Desulfobulbia	o__Desulfobulbales	f__Desulfobulbaceae	g__Electrothrix	s__
CompleteBin_CS01.343	291_1	d__Bacteria	p__Desulfobacterota	c__Desulfobulbia	o__Desulfobulbales	f__Desulfobulbaceae	g__Electrothrix	s__
MetaBAT2_CS01_bin.91	291_1	d__Bacteria	p__Desulfobacterota	c__Desulfobulbia	o__Desulfobulbales	f__Desulfobulbaceae	g__Electrothrix	s__
CONCOCT_CS05_bin.39	292_1	d__Bacteria	p__Desulfobacterota	c__Desulfobulbia	o__Desulfobulbales	f__Desulfobulbaceae	g__Desulfobulbus_C	s__Desulfobulbus_C sp030613515
ComeBin_CS05_bin.5775	292_1	d__Bacteria	p__Desulfobacterota	c__Desulfobulbia	o__Desulfobulbales	f__Desulfobulbaceae	g__Desulfobulbus_C	s__Desulfobulbus_C sp030613515
CompleteBin_CS05.391	292_1	d__Bacteria	p__Desulfobacterota	c__Desulfobulbia	o__Desulfobulbales	f__Desulfobulbaceae	g__Desulfobulbus_C	s__Desulfobulbus_C sp030613515
MetaBAT2_CS05_bin.133	292_1	d__Bacteria	p__Desulfobacterota	c__Desulfobulbia	o__Desulfobulbales	f__Desulfobulbaceae	g__Desulfobulbus_C	s__Desulfobulbus_C sp030613515
SemiBin2_CS05_SemiBin.18	292_1	d__Bacteria	p__Desulfobacterota	c__Desulfobulbia	o__Desulfobulbales	f__Desulfobulbaceae	g__Desulfobulbus_C	s__Desulfobulbus_C sp030613515
VAMB_CS05_bin.25500	292_1	d__Bacteria	p__Desulfobacterota	c__Desulfobulbia	o__Desulfobulbales	f__Desulfobulbaceae	g__Desulfobulbus_C	s__Desulfobulbus_C sp030613515
CONCOCT_CS03_bin.196	292_2	d__Bacteria	p__Desulfobacterota	c__Desulfobulbia	o__Desulfobulbales	f__Desulfobulbaceae	g__Desulfobulbus_C	s__
ComeBin_CS03_bin.133187	292_2	d__Bacteria	p__Desulfobacterota	c__Desulfobulbia	o__Desulfobulbales	f__Desulfobulbaceae	g__Desulfobulbus_C	s__
CompleteBin_CS03.372	292_2	d__Bacteria	p__Desulfobacterota	c__Desulfobulbia	o__Desulfobulbales	f__Desulfobulbaceae	g__Desulfobulbus_C	s__
CompleteBin_CS03.373	292_2	d__Bacteria	p__Desulfobacterota	c__Desulfobulbia	o__Desulfobulbales	f__Desulfobulbaceae	g__Desulfobulbus_C	s__
CONCOCT_CS01_bin.106	292_3	d__Bacteria	p__Desulfobacterota	c__Desulfobulbia	o__Desulfobulbales	f__Desulfobulbaceae	g__Desulfobulbus_C	s__
CompleteBin_CS01.411	292_3	d__Bacteria	p__Desulfobacterota	c__Desulfobulbia	o__Desulfobulbales	f__Desulfobulbaceae	g__Desulfobulbus_C	s__
CompleteBin_CS01.466	292_3	d__Bacteria	p__Desulfobacterota	c__Desulfobulbia	o__Desulfobulbales	f__Desulfobulbaceae	g__Desulfobulbus_C	s__
CompleteBin_CS01.493	292_3	d__Bacteria	p__Desulfobacterota	c__Desulfobulbia	o__Desulfobulbales	f__Desulfobulbaceae	g__Desulfobulbus_C	s__
CONCOCT_CS10_bin.51	292_4	d__Bacteria	p__Desulfobacterota	c__Desulfobulbia	o__Desulfobulbales	f__Desulfobulbaceae	g__Desulfobulbus_C	s__
ComeBin_CS10_bin.118865	292_4	d__Bacteria	p__Desulfobacterota	c__Desulfobulbia	o__Desulfobulbales	f__Desulfobulbaceae	g__Desulfobulbus_C	s__
CompleteBin_CS10.745	292_4	d__Bacteria	p__Desulfobacterota	c__Desulfobulbia	o__Desulfobulbales	f__Desulfobulbaceae	g__Desulfobulbus_C	s__
MetaBAT2_CS10_bin.138	292_4	d__Bacteria	p__Desulfobacterota	c__Desulfobulbia	o__Desulfobulbales	f__Desulfobulbaceae	g__Desulfobulbus_C	s__
VAMB_CS10_bin.14288	292_4	d__Bacteria	p__Desulfobacterota	c__Desulfobulbia	o__Desulfobulbales	f__Desulfobulbaceae	g__Desulfobulbus_C	s__
CONCOCT_CS08_bin.28	292_5	d__Bacteria	p__Desulfobacterota	c__Desulfobulbia	o__Desulfobulbales	f__Desulfobulbaceae	g__Desulfobulbus_C	s__
ComeBin_CS08_bin.162148	292_5	d__Bacteria	p__Desulfobacterota	c__Desulfobulbia	o__Desulfobulbales	f__Desulfobulbaceae	g__Desulfobulbus_C	s__
CompleteBin_CS08.211	292_5	d__Bacteria	p__Desulfobacterota	c__Desulfobulbia	o__Desulfobulbales	f__Desulfobulbaceae	g__Desulfobulbus_C	s__
ComeBin_CS05_bin.41409	293_1	d__Bacteria	p__Desulfobacterota	c__Desulfobulbia	o__Desulfobulbales	f__Desulfobulbaceae	g__UBA10518	s__
CompleteBin_CS05.142	293_1	d__Bacteria	p__Desulfobacterota	c__Desulfobulbia	o__Desulfobulbales	f__Desulfobulbaceae	g__UBA10518	s__
MetaBAT2_CS05_bin.24	293_1	d__Bacteria	p__Desulfobacterota	c__Desulfobulbia	o__Desulfobulbales	f__Desulfobulbaceae	g__UBA10518	s__
SemiBin2_CS05_SemiBin.84	293_1	d__Bacteria	p__Desulfobacterota	c__Desulfobulbia	o__Desulfobulbales	f__Desulfobulbaceae	g__UBA10518	s__
CompleteBin_CS05.550	294_0	d__Bacteria	p__Desulfobacterota	c__Desulfobulbia	o__Desulfobulbales	f__BM004	g__	s__
ComeBin_CS05_bin.738	295_1	d__Bacteria	p__Desulfobacterota	c__Desulfobulbia	o__Desulfobulbales	f__Desulfocapsaceae	g__Desulforhopalus	s__Desulforhopalus sp013139415
CompleteBin_CS05.168	295_1	d__Bacteria	p__Desulfobacterota	c__Desulfobulbia	o__Desulfobulbales	f__Desulfocapsaceae	g__Desulforhopalus	s__Desulforhopalus sp013139415
CompleteBin_CS05.197	295_1	d__Bacteria	p__Desulfobacterota	c__Desulfobulbia	o__Desulfobulbales	f__Desulfocapsaceae	g__Desulforhopalus	s__Desulforhopalus sp013139415
CompleteBin_CS05.319	295_1	d__Bacteria	p__Desulfobacterota	c__Desulfobulbia	o__Desulfobulbales	f__Desulfocapsaceae	g__Desulforhopalus	s__Desulforhopalus sp013139415
CompleteBin_CS05.428	295_1	d__Bacteria	p__Desulfobacterota	c__Desulfobulbia	o__Desulfobulbales	f__Desulfocapsaceae	g__Desulforhopalus	s__Desulforhopalus sp013139415
CompleteBin_CS05.558	295_1	d__Bacteria	p__Desulfobacterota	c__Desulfobulbia	o__Desulfobulbales	f__Desulfocapsaceae	g__Desulforhopalus	s__Desulforhopalus sp013139415
MetaBAT2_CS05_bin.144	295_1	d__Bacteria	p__Desulfobacterota	c__Desulfobulbia	o__Desulfobulbales	f__Desulfocapsaceae	g__Desulforhopalus	s__Desulforhopalus sp013139415
SemiBin2_CS05_SemiBin.6	295_1	d__Bacteria	p__Desulfobacterota	c__Desulfobulbia	o__Desulfobulbales	f__Desulfocapsaceae	g__Desulforhopalus	s__Desulforhopalus sp013139415
VAMB_CS05_bin.20408	295_1	d__Bacteria	p__Desulfobacterota	c__Desulfobulbia	o__Desulfobulbales	f__Desulfocapsaceae	g__Desulforhopalus	s__Desulforhopalus sp013139415
CompleteBin_CS05.657	295_2	d__Bacteria	p__Desulfobacterota	c__Desulfobulbia	o__Desulfobulbales	f__Desulfocapsaceae	g__Desulforhopalus	s__Desulforhopalus sp013139415
ComeBin_CS05_bin.71117	296_1	d__Bacteria	p__Desulfobacterota	c__Desulfobulbia	o__Desulfobulbales	f__Desulfocapsaceae	g__Desulfocapsa	s__
CompleteBin_CS05.113	296_1	d__Bacteria	p__Desulfobacterota	c__Desulfobulbia	o__Desulfobulbales	f__Desulfocapsaceae	g__Desulfocapsa	s__
VAMB_CS05_bin.19228	296_1	d__Bacteria	p__Desulfobacterota	c__Desulfobulbia	o__Desulfobulbales	f__Desulfocapsaceae	g__Desulfocapsa	s__
ComeBin_CS05_bin.27866	297_1	d__Bacteria	p__Desulfobacterota	c__Desulfobulbia	o__Desulfobulbales	f__Desulfocapsaceae	g__Desulfocapsa	s__
CompleteBin_CS05.112	297_1	d__Bacteria	p__Desulfobacterota	c__Desulfobulbia	o__Desulfobulbales	f__Desulfocapsaceae	g__Desulfocapsa	s__
CompleteBin_CS05.86	297_1	d__Bacteria	p__Desulfobacterota	c__Desulfobulbia	o__Desulfobulbales	f__Desulfocapsaceae	g__Desulfocapsa	s__
MetaBAT2_CS05_bin.46	297_1	d__Bacteria	p__Desulfobacterota	c__Desulfobulbia	o__Desulfobulbales	f__Desulfocapsaceae	g__Desulfocapsa	s__
SemiBin2_CS05_SemiBin.59	297_1	d__Bacteria	p__Desulfobacterota	c__Desulfobulbia	o__Desulfobulbales	f__Desulfocapsaceae	g__Desulfocapsa	s__
CONCOCT_CS08_bin.127	298_1	d__Bacteria	p__Desulfobacterota	c__Desulfobulbia	o__Desulfobulbales	f__Desulfocapsaceae	g__Desulfocapsa	s__
ComeBin_CS08_bin.111290	298_1	d__Bacteria	p__Desulfobacterota	c__Desulfobulbia	o__Desulfobulbales	f__Desulfocapsaceae	g__Desulfocapsa	s__
CompleteBin_CS08.202	298_1	d__Bacteria	p__Desulfobacterota	c__Desulfobulbia	o__Desulfobulbales	f__Desulfocapsaceae	g__Desulfocapsa	s__
MetaBAT2_CS08_bin.44	298_1	d__Bacteria	p__Desulfobacterota	c__Desulfobulbia	o__Desulfobulbales	f__Desulfocapsaceae	g__Desulfocapsa	s__
VAMB_CS08_bin.22067	298_1	d__Bacteria	p__Desulfobacterota	c__Desulfobulbia	o__Desulfobulbales	f__Desulfocapsaceae	g__Desulfocapsa	s__
CompleteBin_CS03.679	298_2	d__Bacteria	p__Desulfobacterota	c__Desulfobulbia	o__Desulfobulbales	f__Desulfocapsaceae	g__Desulfocapsa	s__
ComeBin_CS10_bin.147953	299_1	d__Bacteria	p__Desulfobacterota	c__Desulfobulbia	o__Desulfobulbales	f__Desulfocapsaceae	g__Desulfomarina	s__
CompleteBin_CS10.513	299_1	d__Bacteria	p__Desulfobacterota	c__Desulfobulbia	o__Desulfobulbales	f__Desulfocapsaceae	g__Desulfomarina	s__
CompleteBin_CS10.568	299_1	d__Bacteria	p__Desulfobacterota	c__Desulfobulbia	o__Desulfobulbales	f__Desulfocapsaceae	g__Desulfomarina	s__
CompleteBin_CS10.757	299_1	d__Bacteria	p__Desulfobacterota	c__Desulfobulbia	o__Desulfobulbales	f__Desulfocapsaceae	g__Desulfomarina	s__
MetaBAT2_CS10_bin.5	299_1	d__Bacteria	p__Desulfobacterota	c__Desulfobulbia	o__Desulfobulbales	f__Desulfocapsaceae	g__Desulfomarina	s__
ComeBin_CS08_bin.93666	299_2	d__Bacteria	p__Desulfobacterota	c__Desulfobulbia	o__Desulfobulbales	f__Desulfocapsaceae	g__Desulfomarina	s__
CompleteBin_CS08.171	299_2	d__Bacteria	p__Desulfobacterota	c__Desulfobulbia	o__Desulfobulbales	f__Desulfocapsaceae	g__Desulfomarina	s__
MetaBAT2_CS08_bin.29	299_2	d__Bacteria	p__Desulfobacterota	c__Desulfobulbia	o__Desulfobulbales	f__Desulfocapsaceae	g__Desulfomarina	s__
CompleteBin_CS01.666	3_0	d__Bacteria	p__Actinomycetota	c__Humimicrobiia	o__Humimicrobiales	f__Humimicrobiaceae	g__M55B120	s__
CONCOCT_CS03_bin.66	30_1	d__Bacteria	p__Chloroflexota	c__Anaerolineae	o__Promineifilales	f__Promineifilaceae	g__UBA11865	s__
ComeBin_CS03_bin.65933	30_1	d__Bacteria	p__Chloroflexota	c__Anaerolineae	o__Promineifilales	f__Promineifilaceae	g__UBA11865	s__
CompleteBin_CS03.167	30_1	d__Bacteria	p__Chloroflexota	c__Anaerolineae	o__Promineifilales	f__Promineifilaceae	g__UBA11865	s__
SemiBin2_CS03_SemiBin.219	30_1	d__Bacteria	p__Chloroflexota	c__Anaerolineae	o__Promineifilales	f__Promineifilaceae	g__UBA11865	s__
VAMB_CS03_bin.32690	30_1	d__Bacteria	p__Chloroflexota	c__Anaerolineae	o__Promineifilales	f__Promineifilaceae	g__UBA11865	s__
CompleteBin_CS08.185	30_2	d__Bacteria	p__Chloroflexota	c__Anaerolineae	o__Promineifilales	f__Promineifilaceae	g__UBA11865	s__
CompleteBin_CS08.294	30_2	d__Bacteria	p__Chloroflexota	c__Anaerolineae	o__Promineifilales	f__Promineifilaceae	g__UBA11865	s__
CompleteBin_CS12.544	30_3	d__Bacteria	p__Chloroflexota	c__Anaerolineae	o__Promineifilales	f__Promineifilaceae	g__UBA11865	s__
CONCOCT_CS01_bin.232	300_1	d__Bacteria	p__Desulfobacterota	c__Desulfobulbia	o__Desulfobulbales	f__Desulfocapsaceae	g__Desulfomarina	s__
ComeBin_CS01_bin.138261	300_1	d__Bacteria	p__Desulfobacterota	c__Desulfobulbia	o__Desulfobulbales	f__Desulfocapsaceae	g__Desulfomarina	s__
CompleteBin_CS01.265	300_1	d__Bacteria	p__Desulfobacterota	c__Desulfobulbia	o__Desulfobulbales	f__Desulfocapsaceae	g__Desulfomarina	s__
CompleteBin_CS01.339	300_1	d__Bacteria	p__Desulfobacterota	c__Desulfobulbia	o__Desulfobulbales	f__Desulfocapsaceae	g__Desulfomarina	s__
CompleteBin_CS01.416	300_1	d__Bacteria	p__Desulfobacterota	c__Desulfobulbia	o__Desulfobulbales	f__Desulfocapsaceae	g__Desulfomarina	s__
CompleteBin_CS01.549	300_1	d__Bacteria	p__Desulfobacterota	c__Desulfobulbia	o__Desulfobulbales	f__Desulfocapsaceae	g__Desulfomarina	s__
ComeBin_CS10_bin.30945	300_2	d__Bacteria	p__Desulfobacterota	c__Desulfobulbia	o__Desulfobulbales	f__Desulfocapsaceae	g__Desulfomarina	s__Desulfomarina sp030599175
CompleteBin_CS10.123	300_2	d__Bacteria	p__Desulfobacterota	c__Desulfobulbia	o__Desulfobulbales	f__Desulfocapsaceae	g__Desulfomarina	s__Desulfomarina sp030599175
MetaBAT2_CS10_bin.134	300_2	d__Bacteria	p__Desulfobacterota	c__Desulfobulbia	o__Desulfobulbales	f__Desulfocapsaceae	g__Desulfomarina	s__Desulfomarina sp030599175
SemiBin2_CS10_SemiBin.75	300_2	d__Bacteria	p__Desulfobacterota	c__Desulfobulbia	o__Desulfobulbales	f__Desulfocapsaceae	g__Desulfomarina	s__Desulfomarina sp030599175
VAMB_CS10_bin.33259	300_2	d__Bacteria	p__Desulfobacterota	c__Desulfobulbia	o__Desulfobulbales	f__Desulfocapsaceae	g__Desulfomarina	s__Desulfomarina sp030599175
ComeBin_CS08_bin.55289	300_3	d__Bacteria	p__Desulfobacterota	c__Desulfobulbia	o__Desulfobulbales	f__Desulfocapsaceae	g__Desulfomarina	s__Desulfomarina sp030599175
CompleteBin_CS08.165	300_3	d__Bacteria	p__Desulfobacterota	c__Desulfobulbia	o__Desulfobulbales	f__Desulfocapsaceae	g__Desulfomarina	s__Desulfomarina sp030599175
CompleteBin_CS08.629	300_3	d__Bacteria	p__Desulfobacterota	c__Desulfobulbia	o__Desulfobulbales	f__Desulfocapsaceae	g__Desulfomarina	s__Desulfomarina sp030599175
MetaBAT2_CS08_bin.37	300_3	d__Bacteria	p__Desulfobacterota	c__Desulfobulbia	o__Desulfobulbales	f__Desulfocapsaceae	g__Desulfomarina	s__Desulfomarina sp030599175
ComeBin_CS01_bin.64330	301_1	d__Bacteria	p__Desulfobacterota	c__DSM-4660	o__Desulfatiglandales	f__Desulfatiglandaceae	g__JAFDJF01	s__JAFDJF01 sp019307645
CompleteBin_CS01.354	301_1	d__Bacteria	p__Desulfobacterota	c__DSM-4660	o__Desulfatiglandales	f__Desulfatiglandaceae	g__JAFDJF01	s__JAFDJF01 sp019307645
SemiBin2_CS01_SemiBin.206	301_1	d__Bacteria	p__Desulfobacterota	c__DSM-4660	o__Desulfatiglandales	f__Desulfatiglandaceae	g__JAFDJF01	s__JAFDJF01 sp019307645
VAMB_CS01_bin.19012	301_1	d__Bacteria	p__Desulfobacterota	c__DSM-4660	o__Desulfatiglandales	f__Desulfatiglandaceae	g__JAFDJF01	s__JAFDJF01 sp019307645
ComeBin_CS08_bin.89261	301_2	d__Bacteria	p__Desulfobacterota	c__DSM-4660	o__Desulfatiglandales	f__Desulfatiglandaceae	g__JAFDJF01	s__JAFDJF01 sp019307645
CompleteBin_CS08.161	301_2	d__Bacteria	p__Desulfobacterota	c__DSM-4660	o__Desulfatiglandales	f__Desulfatiglandaceae	g__JAFDJF01	s__JAFDJF01 sp019307645
CompleteBin_CS08.162	301_2	d__Bacteria	p__Desulfobacterota	c__DSM-4660	o__Desulfatiglandales	f__Desulfatiglandaceae	g__JAFDJF01	s__JAFDJF01 sp019307645
MetaBAT2_CS08_bin.65	301_2	d__Bacteria	p__Desulfobacterota	c__DSM-4660	o__Desulfatiglandales	f__Desulfatiglandaceae	g__JAFDJF01	s__JAFDJF01 sp019307645
VAMB_CS08_bin.16739	301_2	d__Bacteria	p__Desulfobacterota	c__DSM-4660	o__Desulfatiglandales	f__Desulfatiglandaceae	g__JAFDJF01	s__JAFDJF01 sp019307645
CONCOCT_CS10_bin.104	302_1	d__Bacteria	p__Desulfobacterota	c__DSM-4660	o__Desulfatiglandales	f__Desulfatiglandaceae	g__Desulfacyla	s__
ComeBin_CS10_bin.269163	302_1	d__Bacteria	p__Desulfobacterota	c__DSM-4660	o__Desulfatiglandales	f__Desulfatiglandaceae	g__Desulfacyla	s__
CompleteBin_CS10.312	302_1	d__Bacteria	p__Desulfobacterota	c__DSM-4660	o__Desulfatiglandales	f__Desulfatiglandaceae	g__Desulfacyla	s__
CompleteBin_CS10.473	302_1	d__Bacteria	p__Desulfobacterota	c__DSM-4660	o__Desulfatiglandales	f__Desulfatiglandaceae	g__Desulfacyla	s__
CompleteBin_CS10.772	302_1	d__Bacteria	p__Desulfobacterota	c__DSM-4660	o__Desulfatiglandales	f__Desulfatiglandaceae	g__Desulfacyla	s__
ComeBin_CS08_bin.251510	302_2	d__Bacteria	p__Desulfobacterota	c__DSM-4660	o__Desulfatiglandales	f__Desulfatiglandaceae	g__Desulfacyla	s__
CompleteBin_CS08.349	302_2	d__Bacteria	p__Desulfobacterota	c__DSM-4660	o__Desulfatiglandales	f__Desulfatiglandaceae	g__Desulfacyla	s__
ComeBin_CS01_bin.211303	302_3	d__Bacteria	p__Desulfobacterota	c__DSM-4660	o__Desulfatiglandales	f__Desulfatiglandaceae	g__Desulfacyla	s__
CompleteBin_CS01.352	302_3	d__Bacteria	p__Desulfobacterota	c__DSM-4660	o__Desulfatiglandales	f__Desulfatiglandaceae	g__Desulfacyla	s__
CompleteBin_CS01.526	302_3	d__Bacteria	p__Desulfobacterota	c__DSM-4660	o__Desulfatiglandales	f__Desulfatiglandaceae	g__Desulfacyla	s__
CompleteBin_CS01.677	302_3	d__Bacteria	p__Desulfobacterota	c__DSM-4660	o__Desulfatiglandales	f__Desulfatiglandaceae	g__Desulfacyla	s__
CONCOCT_CS05_bin.126	303_1	d__Bacteria	p__Pseudomonadota	c__Zetaproteobacteria	o__Mariprofundales	f__Mariprofundaceae	g__WSZY01	s__
ComeBin_CS05_bin.48033	303_1	d__Bacteria	p__Pseudomonadota	c__Zetaproteobacteria	o__Mariprofundales	f__Mariprofundaceae	g__WSZY01	s__
CompleteBin_CS05.160	303_1	d__Bacteria	p__Pseudomonadota	c__Zetaproteobacteria	o__Mariprofundales	f__Mariprofundaceae	g__WSZY01	s__
MetaBAT2_CS05_bin.16	303_1	d__Bacteria	p__Pseudomonadota	c__Zetaproteobacteria	o__Mariprofundales	f__Mariprofundaceae	g__WSZY01	s__
SemiBin2_CS05_SemiBin.94	303_1	d__Bacteria	p__Pseudomonadota	c__Zetaproteobacteria	o__Mariprofundales	f__Mariprofundaceae	g__WSZY01	s__
ComeBin_CS08_bin.133107	304_1	d__Bacteria	p__Pseudomonadota	c__Alphaproteobacteria	o__Rhodospirillales_A	f__JAOUPW01	g__JAOUPW01	s__
CompleteBin_CS08.236	304_1	d__Bacteria	p__Pseudomonadota	c__Alphaproteobacteria	o__Rhodospirillales_A	f__JAOUPW01	g__JAOUPW01	s__
MetaBAT2_CS08_bin.12	304_1	d__Bacteria	p__Pseudomonadota	c__Alphaproteobacteria	o__Rhodospirillales_A	f__JAOUPW01	g__JAOUPW01	s__
CONCOCT_CS08_bin.63	305_1	Unclassified
ComeBin_CS08_bin.14140	305_1	Unclassified
SemiBin2_CS08_SemiBin.50	305_1	Unclassified
ComeBin_CS08_bin.104902	306_0	Unclassified Bacteria
CONCOCT_CS12_bin.265	307_0	Unclassified
SemiBin2_CS12_SemiBin.20	308_0	Unclassified Bacteria
SemiBin2_CS12_SemiBin.176	309_0	Unclassified Bacteria
CONCOCT_CS03_bin.163	31_1	d__Bacteria	p__Chloroflexota	c__Anaerolineae	o__Anaerolineales	f__UBA11858	g__	s__
CompleteBin_CS03.521	31_1	d__Bacteria	p__Chloroflexota	c__Anaerolineae	o__Anaerolineales	f__UBA11858	g__	s__
CompleteBin_CS08.508	31_2	d__Bacteria	p__Chloroflexota	c__Anaerolineae	o__Anaerolineales	f__UBA11858	g__	s__
ComeBin_CS08_bin.57328	310_1	d__Bacteria	p__Pseudomonadota	c__Gammaproteobacteria	o__Pseudomonadales	f__Halieaceae	g__Halioglobus	s__
CompleteBin_CS08.100	310_1	d__Bacteria	p__Pseudomonadota	c__Gammaproteobacteria	o__Pseudomonadales	f__Halieaceae	g__Halioglobus	s__
MetaBAT2_CS08_bin.10	310_1	d__Bacteria	p__Pseudomonadota	c__Gammaproteobacteria	o__Pseudomonadales	f__Halieaceae	g__Halioglobus	s__
ComeBin_CS08_bin.28988	311_1	d__Bacteria	p__Pseudomonadota	c__Gammaproteobacteria	o__Pseudomonadales	f__Halieaceae	g__Halioglobus	s__
CompleteBin_CS08.81	311_1	d__Bacteria	p__Pseudomonadota	c__Gammaproteobacteria	o__Pseudomonadales	f__Halieaceae	g__Halioglobus	s__
MetaBAT2_CS08_bin.15	311_1	d__Bacteria	p__Pseudomonadota	c__Gammaproteobacteria	o__Pseudomonadales	f__Halieaceae	g__Halioglobus	s__
ComeBin_CS10_bin.9224	312_1	d__Bacteria	p__Pseudomonadota	c__Gammaproteobacteria	o__Pseudomonadales	f__Halieaceae	g__Halioglobus	s__
CompleteBin_CS10.824	312_1	d__Bacteria	p__Pseudomonadota	c__Gammaproteobacteria	o__Pseudomonadales	f__Halieaceae	g__Halioglobus	s__
CompleteBin_CS10.862	312_1	d__Bacteria	p__Pseudomonadota	c__Gammaproteobacteria	o__Pseudomonadales	f__Halieaceae	g__Halioglobus	s__
MetaBAT2_CS10_bin.15	312_1	d__Bacteria	p__Pseudomonadota	c__Gammaproteobacteria	o__Pseudomonadales	f__Halieaceae	g__Halioglobus	s__
SemiBin2_CS10_SemiBin.32	312_1	d__Bacteria	p__Pseudomonadota	c__Gammaproteobacteria	o__Pseudomonadales	f__Halieaceae	g__Halioglobus	s__
VAMB_CS10_bin.11906	312_1	d__Bacteria	p__Pseudomonadota	c__Gammaproteobacteria	o__Pseudomonadales	f__Halieaceae	g__Halioglobus	s__
ComeBin_CS08_bin.9296	312_2	d__Bacteria	p__Pseudomonadota	c__Gammaproteobacteria	o__Pseudomonadales	f__Halieaceae	g__Halioglobus	s__
CompleteBin_CS08.245	312_2	d__Bacteria	p__Pseudomonadota	c__Gammaproteobacteria	o__Pseudomonadales	f__Halieaceae	g__Halioglobus	s__
MetaBAT2_CS08_bin.146	312_2	d__Bacteria	p__Pseudomonadota	c__Gammaproteobacteria	o__Pseudomonadales	f__Halieaceae	g__Halioglobus	s__
SemiBin2_CS08_SemiBin.34	312_2	d__Bacteria	p__Pseudomonadota	c__Gammaproteobacteria	o__Pseudomonadales	f__Halieaceae	g__Halioglobus	s__
CONCOCT_CS12_bin.253	313_1	d__Bacteria	p__Myxococcota	c__Polyangia	o__JAAYKL01	f__JAAYKL01	g__JANQET01	s__
CompleteBin_CS12.386	313_1	d__Bacteria	p__Myxococcota	c__Polyangia	o__JAAYKL01	f__JAAYKL01	g__JANQET01	s__
MetaBAT2_CS12_bin.147	313_1	d__Bacteria	p__Myxococcota	c__Polyangia	o__JAAYKL01	f__JAAYKL01	g__JANQET01	s__
CONCOCT_CS10_bin.222	313_2	d__Bacteria	p__Myxococcota	c__Polyangia	o__JAAYKL01	f__JAAYKL01	g__JANQET01	s__
ComeBin_CS10_bin.82662	313_2	d__Bacteria	p__Myxococcota	c__Polyangia	o__JAAYKL01	f__JAAYKL01	g__JANQET01	s__
CompleteBin_CS10.676	313_2	d__Bacteria	p__Myxococcota	c__Polyangia	o__JAAYKL01	f__JAAYKL01	g__JANQET01	s__
CompleteBin_CS10.677	313_2	d__Bacteria	p__Myxococcota	c__Polyangia	o__JAAYKL01	f__JAAYKL01	g__JANQET01	s__
MetaBAT2_CS10_bin.57	313_2	d__Bacteria	p__Myxococcota	c__Polyangia	o__JAAYKL01	f__JAAYKL01	g__JANQET01	s__
SemiBin2_CS10_SemiBin.150	313_2	d__Bacteria	p__Myxococcota	c__Polyangia	o__JAAYKL01	f__JAAYKL01	g__JANQET01	s__
ComeBin_CS01_bin.239709	314_1	d__Bacteria	p__Krumholzibacteriota	c__Krumholzibacteria	o__WVZY01	f__WVZY01	g__	s__
CompleteBin_CS01.835	314_1	d__Bacteria	p__Krumholzibacteriota	c__Krumholzibacteria	o__WVZY01	f__WVZY01	g__	s__
CONCOCT_CS01_bin.280	315_1	d__Bacteria	p__Myxococcota	c__Polyangia	o__JAAYKL01	f__JAAYKL01	g__JAUVAN01	s__JAUVAN01 sp030595125
CompleteBin_CS01.710	315_1	d__Bacteria	p__Myxococcota	c__Polyangia	o__JAAYKL01	f__JAAYKL01	g__JAUVAN01	s__JAUVAN01 sp030595125
CompleteBin_CS01.73	315_1	d__Bacteria	p__Myxococcota	c__Polyangia	o__JAAYKL01	f__JAAYKL01	g__JAUVAN01	s__JAUVAN01 sp030595125
CONCOCT_CS08_bin.256	316_1	d__Bacteria	p__Pseudomonadota	c__Alphaproteobacteria	o__JAPULJ01	f__JAPULJ01	g__JAPULJ01	s__
ComeBin_CS08_bin.175885	316_1	d__Bacteria	p__Pseudomonadota	c__Alphaproteobacteria	o__JAPULJ01	f__JAPULJ01	g__JAPULJ01	s__
CompleteBin_CS08.311	316_1	d__Bacteria	p__Pseudomonadota	c__Alphaproteobacteria	o__JAPULJ01	f__JAPULJ01	g__JAPULJ01	s__
CONCOCT_CS10_bin.28	317_1	d__Bacteria	p__Pseudomonadota	c__Alphaproteobacteria	o__Kiloniellales	f__J153	g__JAJFGN01	s__
ComeBin_CS10_bin.291420	317_1	d__Bacteria	p__Pseudomonadota	c__Alphaproteobacteria	o__Kiloniellales	f__J153	g__JAJFGN01	s__
CompleteBin_CS10.888	317_1	d__Bacteria	p__Pseudomonadota	c__Alphaproteobacteria	o__Kiloniellales	f__J153	g__JAJFGN01	s__
ComeBin_CS08_bin.35114	317_2	d__Bacteria	p__Pseudomonadota	c__Alphaproteobacteria	o__Kiloniellales	f__J153	g__JAJFGN01	s__
CompleteBin_CS08.10	317_2	d__Bacteria	p__Pseudomonadota	c__Alphaproteobacteria	o__Kiloniellales	f__J153	g__JAJFGN01	s__
CompleteBin_CS08.9	317_2	d__Bacteria	p__Pseudomonadota	c__Alphaproteobacteria	o__Kiloniellales	f__J153	g__JAJFGN01	s__
MetaBAT2_CS08_bin.96	317_2	d__Bacteria	p__Pseudomonadota	c__Alphaproteobacteria	o__Kiloniellales	f__J153	g__JAJFGN01	s__
SemiBin2_CS08_SemiBin.78	317_2	d__Bacteria	p__Pseudomonadota	c__Alphaproteobacteria	o__Kiloniellales	f__J153	g__JAJFGN01	s__
VAMB_CS08_bin.30728	317_2	d__Bacteria	p__Pseudomonadota	c__Alphaproteobacteria	o__Kiloniellales	f__J153	g__JAJFGN01	s__
CONCOCT_CS12_bin.29	318_1	d__Bacteria	p__Zixibacteria	c__MSB-5A5	o__JAABVY01	f__JAHJOQ01	g__DAOVLC01	s__
ComeBin_CS12_bin.54134	318_1	d__Bacteria	p__Zixibacteria	c__MSB-5A5	o__JAABVY01	f__JAHJOQ01	g__DAOVLC01	s__
CompleteBin_CS12.109	318_1	d__Bacteria	p__Zixibacteria	c__MSB-5A5	o__JAABVY01	f__JAHJOQ01	g__DAOVLC01	s__
MetaBAT2_CS12_bin.101	318_1	d__Bacteria	p__Zixibacteria	c__MSB-5A5	o__JAABVY01	f__JAHJOQ01	g__DAOVLC01	s__
CONCOCT_CS01_bin.9	319_1	d__Bacteria	p__Zixibacteria	c__MSB-5A5	o__JAABVY01	f__JAHJOQ01	g__JAJRZO01	s__
ComeBin_CS01_bin.232838	319_1	d__Bacteria	p__Zixibacteria	c__MSB-5A5	o__JAABVY01	f__JAHJOQ01	g__JAJRZO01	s__
CompleteBin_CS01.165	319_1	d__Bacteria	p__Zixibacteria	c__MSB-5A5	o__JAABVY01	f__JAHJOQ01	g__JAJRZO01	s__
CompleteBin_CS01.201	319_1	d__Bacteria	p__Zixibacteria	c__MSB-5A5	o__JAABVY01	f__JAHJOQ01	g__JAJRZO01	s__
CompleteBin_CS01.814	319_1	d__Bacteria	p__Zixibacteria	c__MSB-5A5	o__JAABVY01	f__JAHJOQ01	g__JAJRZO01	s__
CompleteBin_CS05.783	32_0	d__Bacteria	p__Chloroflexota	c__Anaerolineae	o__Promineifilales	f__Promineifilaceae	g__JAACFF01	s__
CONCOCT_CS12_bin.145	320_1	d__Bacteria	p__Pseudomonadota	c__Gammaproteobacteria	o__UBA6429	f__UBA6429	g__JAHEDB01	s__
CompleteBin_CS12.541	320_1	d__Bacteria	p__Pseudomonadota	c__Gammaproteobacteria	o__UBA6429	f__UBA6429	g__JAHEDB01	s__
CompleteBin_CS08.154	320_2	d__Bacteria	p__Pseudomonadota	c__Gammaproteobacteria	o__UBA6429	f__UBA6429	g__JAHEDB01	s__
ComeBin_CS12_bin.3090	321_1	d__Bacteria	p__Pseudomonadota	c__Gammaproteobacteria	o__SZUA-229	f__SZUA-229	g__	s__
CompleteBin_CS12.599	321_1	d__Bacteria	p__Pseudomonadota	c__Gammaproteobacteria	o__SZUA-229	f__SZUA-229	g__	s__
SemiBin2_CS12_SemiBin.7	321_1	d__Bacteria	p__Pseudomonadota	c__Gammaproteobacteria	o__SZUA-229	f__SZUA-229	g__	s__
ComeBin_CS12_bin.19348	322_1	d__Bacteria	p__Pseudomonadota	c__Gammaproteobacteria	o__UBA6429	f__UBA6429	g__UBA6492	s__
CompleteBin_CS12.666	322_1	d__Bacteria	p__Pseudomonadota	c__Gammaproteobacteria	o__UBA6429	f__UBA6429	g__UBA6492	s__
CompleteBin_CS12.781	322_1	d__Bacteria	p__Pseudomonadota	c__Gammaproteobacteria	o__UBA6429	f__UBA6429	g__UBA6492	s__
SemiBin2_CS12_SemiBin.81	322_1	d__Bacteria	p__Pseudomonadota	c__Gammaproteobacteria	o__UBA6429	f__UBA6429	g__UBA6492	s__
ComeBin_CS12_bin.15	323_1	d__Bacteria	p__Pseudomonadota	c__Gammaproteobacteria	o__Acidiferrobacterales	f__JAJDNE01	g__JAJDNE01	s__
CompleteBin_CS12.299	323_1	d__Bacteria	p__Pseudomonadota	c__Gammaproteobacteria	o__Acidiferrobacterales	f__JAJDNE01	g__JAJDNE01	s__
CompleteBin_CS12.52	323_1	d__Bacteria	p__Pseudomonadota	c__Gammaproteobacteria	o__Acidiferrobacterales	f__JAJDNE01	g__JAJDNE01	s__
MetaBAT2_CS12_bin.29	323_1	d__Bacteria	p__Pseudomonadota	c__Gammaproteobacteria	o__Acidiferrobacterales	f__JAJDNE01	g__JAJDNE01	s__
SemiBin2_CS12_SemiBin.4	323_1	d__Bacteria	p__Pseudomonadota	c__Gammaproteobacteria	o__Acidiferrobacterales	f__JAJDNE01	g__JAJDNE01	s__
ComeBin_CS12_bin.8038	324_1	d__Bacteria	p__Pseudomonadota	c__Gammaproteobacteria	o__Acidiferrobacterales	f__CAJVXG01	g__CAJVXG01	s__
CompleteBin_CS12.7	324_1	d__Bacteria	p__Pseudomonadota	c__Gammaproteobacteria	o__Acidiferrobacterales	f__CAJVXG01	g__CAJVXG01	s__
MetaBAT2_CS12_bin.110	324_1	d__Bacteria	p__Pseudomonadota	c__Gammaproteobacteria	o__Acidiferrobacterales	f__CAJVXG01	g__CAJVXG01	s__
SemiBin2_CS12_SemiBin.45	324_1	d__Bacteria	p__Pseudomonadota	c__Gammaproteobacteria	o__Acidiferrobacterales	f__CAJVXG01	g__CAJVXG01	s__
ComeBin_CS12_bin.3997	325_1	d__Bacteria	p__Pseudomonadota	c__Gammaproteobacteria	o__Acidiferrobacterales	f__SZUA-150	g__SZUA-150	s__
CompleteBin_CS12.153	325_1	d__Bacteria	p__Pseudomonadota	c__Gammaproteobacteria	o__Acidiferrobacterales	f__SZUA-150	g__SZUA-150	s__
CompleteBin_CS12.36	325_1	d__Bacteria	p__Pseudomonadota	c__Gammaproteobacteria	o__Acidiferrobacterales	f__SZUA-150	g__SZUA-150	s__
MetaBAT2_CS12_bin.93	325_1	d__Bacteria	p__Pseudomonadota	c__Gammaproteobacteria	o__Acidiferrobacterales	f__SZUA-150	g__SZUA-150	s__
SemiBin2_CS12_SemiBin.24	325_1	d__Bacteria	p__Pseudomonadota	c__Gammaproteobacteria	o__Acidiferrobacterales	f__SZUA-150	g__SZUA-150	s__
ComeBin_CS12_bin.61271	326_1	d__Bacteria	p__Pseudomonadota	c__Gammaproteobacteria	o__Acidiferrobacterales	f__JAJDNE01	g__	s__
CompleteBin_CS12.123	326_1	d__Bacteria	p__Pseudomonadota	c__Gammaproteobacteria	o__Acidiferrobacterales	f__JAJDNE01	g__	s__
MetaBAT2_CS12_bin.44	326_1	d__Bacteria	p__Pseudomonadota	c__Gammaproteobacteria	o__Acidiferrobacterales	f__JAJDNE01	g__	s__
SemiBin2_CS12_SemiBin.187	326_1	d__Bacteria	p__Pseudomonadota	c__Gammaproteobacteria	o__Acidiferrobacterales	f__JAJDNE01	g__	s__
ComeBin_CS10_bin.135225	327_1	d__Bacteria	p__Pseudomonadota	c__Gammaproteobacteria	o__Chromatiales	f__Sedimenticolaceae	g__Sva-25	s__
CompleteBin_CS10.1001	327_1	d__Bacteria	p__Pseudomonadota	c__Gammaproteobacteria	o__Chromatiales	f__Sedimenticolaceae	g__Sva-25	s__
CompleteBin_CS01.53	327_2	d__Bacteria	p__Pseudomonadota	c__Gammaproteobacteria	o__Chromatiales	f__Sedimenticolaceae	g__Sva-25	s__
ComeBin_CS01_bin.139764	328_1	d__Bacteria	p__Pseudomonadota	c__Gammaproteobacteria	o__Chromatiales	f__Sedimenticolaceae	g__Sva-25	s__Sva-25 sp030620735
CompleteBin_CS01.365	328_1	d__Bacteria	p__Pseudomonadota	c__Gammaproteobacteria	o__Chromatiales	f__Sedimenticolaceae	g__Sva-25	s__Sva-25 sp030620735
MetaBAT2_CS01_bin.80	328_1	d__Bacteria	p__Pseudomonadota	c__Gammaproteobacteria	o__Chromatiales	f__Sedimenticolaceae	g__Sva-25	s__Sva-25 sp030620735
ComeBin_CS12_bin.58967	328_2	d__Bacteria	p__Pseudomonadota	c__Gammaproteobacteria	o__Chromatiales	f__Sedimenticolaceae	g__Sva-25	s__Sva-25 sp030620735
CompleteBin_CS12.114	328_2	d__Bacteria	p__Pseudomonadota	c__Gammaproteobacteria	o__Chromatiales	f__Sedimenticolaceae	g__Sva-25	s__Sva-25 sp030620735
CompleteBin_CS12.115	328_2	d__Bacteria	p__Pseudomonadota	c__Gammaproteobacteria	o__Chromatiales	f__Sedimenticolaceae	g__Sva-25	s__Sva-25 sp030620735
MetaBAT2_CS12_bin.209	328_2	d__Bacteria	p__Pseudomonadota	c__Gammaproteobacteria	o__Chromatiales	f__Sedimenticolaceae	g__Sva-25	s__Sva-25 sp030620735
SemiBin2_CS12_SemiBin.180	328_2	d__Bacteria	p__Pseudomonadota	c__Gammaproteobacteria	o__Chromatiales	f__Sedimenticolaceae	g__Sva-25	s__Sva-25 sp030620735
ComeBin_CS08_bin.10873	328_3	d__Bacteria	p__Pseudomonadota	c__Gammaproteobacteria	o__Chromatiales	f__Sedimenticolaceae	g__Sva-25	s__Sva-25 sp030620735
CompleteBin_CS08.295	328_3	d__Bacteria	p__Pseudomonadota	c__Gammaproteobacteria	o__Chromatiales	f__Sedimenticolaceae	g__Sva-25	s__Sva-25 sp030620735
MetaBAT2_CS08_bin.17	328_3	d__Bacteria	p__Pseudomonadota	c__Gammaproteobacteria	o__Chromatiales	f__Sedimenticolaceae	g__Sva-25	s__Sva-25 sp030620735
SemiBin2_CS08_SemiBin.37	328_3	d__Bacteria	p__Pseudomonadota	c__Gammaproteobacteria	o__Chromatiales	f__Sedimenticolaceae	g__Sva-25	s__Sva-25 sp030620735
ComeBin_CS10_bin.38606	328_4	d__Bacteria	p__Pseudomonadota	c__Gammaproteobacteria	o__Chromatiales	f__Sedimenticolaceae	g__Sva-25	s__Sva-25 sp030620735
CompleteBin_CS10.181	328_4	d__Bacteria	p__Pseudomonadota	c__Gammaproteobacteria	o__Chromatiales	f__Sedimenticolaceae	g__Sva-25	s__Sva-25 sp030620735
MetaBAT2_CS10_bin.52	328_4	d__Bacteria	p__Pseudomonadota	c__Gammaproteobacteria	o__Chromatiales	f__Sedimenticolaceae	g__Sva-25	s__Sva-25 sp030620735
SemiBin2_CS10_SemiBin.85	328_4	d__Bacteria	p__Pseudomonadota	c__Gammaproteobacteria	o__Chromatiales	f__Sedimenticolaceae	g__Sva-25	s__Sva-25 sp030620735
VAMB_CS10_bin.12343	328_4	d__Bacteria	p__Pseudomonadota	c__Gammaproteobacteria	o__Chromatiales	f__Sedimenticolaceae	g__Sva-25	s__Sva-25 sp030620735
ComeBin_CS03_bin.95451	329_1	d__Bacteria	p__Pseudomonadota	c__Gammaproteobacteria	o__Chromatiales	f__Sedimenticolaceae	g__Sva-25	s__Sva-25 sp030625445
CompleteBin_CS03.257	329_1	d__Bacteria	p__Pseudomonadota	c__Gammaproteobacteria	o__Chromatiales	f__Sedimenticolaceae	g__Sva-25	s__Sva-25 sp030625445
CompleteBin_CS03.255	329_2	d__Bacteria	p__Pseudomonadota	c__Gammaproteobacteria	o__Chromatiales	f__Sedimenticolaceae	g__Sva-25	s__
VAMB_CS03_bin.14238	329_2	d__Bacteria	p__Pseudomonadota	c__Gammaproteobacteria	o__Chromatiales	f__Sedimenticolaceae	g__Sva-25	s__
ComeBin_CS08_bin.202554	329_3	d__Bacteria	p__Pseudomonadota	c__Gammaproteobacteria	o__Chromatiales	f__Sedimenticolaceae	g__Sva-25	s__
CompleteBin_CS08.290	329_3	d__Bacteria	p__Pseudomonadota	c__Gammaproteobacteria	o__Chromatiales	f__Sedimenticolaceae	g__Sva-25	s__
CompleteBin_CS10.209	329_4	d__Bacteria	p__Pseudomonadota	c__Gammaproteobacteria	o__Chromatiales	f__Sedimenticolaceae	g__Sva-25	s__Sva-25 sp030625445
ComeBin_CS01_bin.175401	329_5	d__Bacteria	p__Pseudomonadota	c__Gammaproteobacteria	o__Chromatiales	f__Sedimenticolaceae	g__Sva-25	s__
ComeBin_CS12_bin.95085	329_6	d__Bacteria	p__Pseudomonadota	c__Gammaproteobacteria	o__Chromatiales	f__Sedimenticolaceae	g__Sva-25	s__Sva-25 sp030625445
CompleteBin_CS03.614	33_0	d__Bacteria	p__Chloroflexota	c__Anaerolineae	o__Anaerolineales	f__UBA4823	g__JAUWPO01	s__
ComeBin_CS10_bin.76971	330_1	d__Bacteria	p__Desulfobacterota	c__Desulfuromonadia	o__Desulfuromonadales	f__BM103	g__M0040	s__
CompleteBin_CS10.670	330_2	d__Bacteria	p__Desulfobacterota	c__Desulfuromonadia	o__Desulfuromonadales	f__BM103	g__M0040	s__
ComeBin_CS10_bin.92693	331_0	d__Bacteria	p__Desulfobacterota	c__Desulfuromonadia	o__Desulfuromonadales	f__BM103	g__M0040	s__
CompleteBin_CS08.404	332_0	d__Bacteria	p__Desulfobacterota	c__Desulfuromonadia	o__Desulfuromonadales	f__BM103	g__M0040	s__
CONCOCT_CS08_bin.148	333_1	d__Bacteria	p__Pseudomonadota	c__Gammaproteobacteria	o__Arenicellales	f__Poriferihabitantaceae	g__JAAELZ01	s__
ComeBin_CS08_bin.11728	333_1	d__Bacteria	p__Pseudomonadota	c__Gammaproteobacteria	o__Arenicellales	f__Poriferihabitantaceae	g__JAAELZ01	s__
CompleteBin_CS08.172	333_1	d__Bacteria	p__Pseudomonadota	c__Gammaproteobacteria	o__Arenicellales	f__Poriferihabitantaceae	g__JAAELZ01	s__
CompleteBin_CS08.328	333_1	d__Bacteria	p__Pseudomonadota	c__Gammaproteobacteria	o__Arenicellales	f__Poriferihabitantaceae	g__JAAELZ01	s__
MetaBAT2_CS08_bin.85	333_1	d__Bacteria	p__Pseudomonadota	c__Gammaproteobacteria	o__Arenicellales	f__Poriferihabitantaceae	g__JAAELZ01	s__
SemiBin2_CS08_SemiBin.41	333_1	d__Bacteria	p__Pseudomonadota	c__Gammaproteobacteria	o__Arenicellales	f__Poriferihabitantaceae	g__JAAELZ01	s__
CONCOCT_CS08_bin.154	334_1	d__Bacteria	p__Pseudomonadota	c__Gammaproteobacteria	o__Arenicellales	f__Poriferihabitantaceae	g__JAAELZ01	s__
ComeBin_CS08_bin.169636	334_1	d__Bacteria	p__Pseudomonadota	c__Gammaproteobacteria	o__Arenicellales	f__Poriferihabitantaceae	g__JAAELZ01	s__
CompleteBin_CS08.299	334_1	d__Bacteria	p__Pseudomonadota	c__Gammaproteobacteria	o__Arenicellales	f__Poriferihabitantaceae	g__JAAELZ01	s__
VAMB_CS08_bin.20826	334_1	d__Bacteria	p__Pseudomonadota	c__Gammaproteobacteria	o__Arenicellales	f__Poriferihabitantaceae	g__JAAELZ01	s__
CONCOCT_CS10_bin.210	334_2	d__Bacteria	p__Pseudomonadota	c__Gammaproteobacteria	o__Arenicellales	f__Poriferihabitantaceae	g__JAAELZ01	s__
ComeBin_CS10_bin.16618	334_2	d__Bacteria	p__Pseudomonadota	c__Gammaproteobacteria	o__Arenicellales	f__Poriferihabitantaceae	g__JAAELZ01	s__
CompleteBin_CS10.1091	334_2	d__Bacteria	p__Pseudomonadota	c__Gammaproteobacteria	o__Arenicellales	f__Poriferihabitantaceae	g__JAAELZ01	s__
MetaBAT2_CS10_bin.87	334_2	d__Bacteria	p__Pseudomonadota	c__Gammaproteobacteria	o__Arenicellales	f__Poriferihabitantaceae	g__JAAELZ01	s__
SemiBin2_CS10_SemiBin.51	334_2	d__Bacteria	p__Pseudomonadota	c__Gammaproteobacteria	o__Arenicellales	f__Poriferihabitantaceae	g__JAAELZ01	s__
VAMB_CS10_bin.22960	334_2	d__Bacteria	p__Pseudomonadota	c__Gammaproteobacteria	o__Arenicellales	f__Poriferihabitantaceae	g__JAAELZ01	s__
CompleteBin_CS10.1254	335_0	d__Bacteria	p__Pseudomonadota	c__Gammaproteobacteria	o__Arenicellales	f__Poriferihabitantaceae	g__JAAELZ01	s__
ComeBin_CS05_bin.149074	336_1	d__Bacteria	p__Pseudomonadota	c__Gammaproteobacteria	o__Xanthomonadales	f__SZUA-36	g__JAJRRA01	s__
CompleteBin_CS05.377	336_1	d__Bacteria	p__Pseudomonadota	c__Gammaproteobacteria	o__Xanthomonadales	f__SZUA-36	g__JAJRRA01	s__
ComeBin_CS08_bin.108302	337_1	d__Bacteria	p__Pseudomonadota	c__Gammaproteobacteria	o__Xanthomonadales	f__SZUA-36	g__JAHEFT01	s__
CompleteBin_CS08.198	337_1	d__Bacteria	p__Pseudomonadota	c__Gammaproteobacteria	o__Xanthomonadales	f__SZUA-36	g__JAHEFT01	s__
MetaBAT2_CS08_bin.121	337_1	d__Bacteria	p__Pseudomonadota	c__Gammaproteobacteria	o__Xanthomonadales	f__SZUA-36	g__JAHEFT01	s__
SemiBin2_CS08_SemiBin.187	337_1	d__Bacteria	p__Pseudomonadota	c__Gammaproteobacteria	o__Xanthomonadales	f__SZUA-36	g__JAHEFT01	s__
VAMB_CS08_bin.31708	337_1	d__Bacteria	p__Pseudomonadota	c__Gammaproteobacteria	o__Xanthomonadales	f__SZUA-36	g__JAHEFT01	s__
ComeBin_CS10_bin.1549	337_2	d__Bacteria	p__Pseudomonadota	c__Gammaproteobacteria	o__Xanthomonadales	f__SZUA-36	g__JAHEFT01	s__
CompleteBin_CS10.13	337_2	d__Bacteria	p__Pseudomonadota	c__Gammaproteobacteria	o__Xanthomonadales	f__SZUA-36	g__JAHEFT01	s__
MetaBAT2_CS10_bin.132	337_2	d__Bacteria	p__Pseudomonadota	c__Gammaproteobacteria	o__Xanthomonadales	f__SZUA-36	g__JAHEFT01	s__
SemiBin2_CS10_SemiBin.8	337_2	d__Bacteria	p__Pseudomonadota	c__Gammaproteobacteria	o__Xanthomonadales	f__SZUA-36	g__JAHEFT01	s__
VAMB_CS10_bin.21230	337_2	d__Bacteria	p__Pseudomonadota	c__Gammaproteobacteria	o__Xanthomonadales	f__SZUA-36	g__JAHEFT01	s__
ComeBin_CS08_bin.66413	338_1	d__Bacteria	p__Pseudomonadota	c__Gammaproteobacteria	o__Xanthomonadales	f__SZUA-36	g__SZUA-36	s__
CompleteBin_CS08.113	338_1	d__Bacteria	p__Pseudomonadota	c__Gammaproteobacteria	o__Xanthomonadales	f__SZUA-36	g__SZUA-36	s__
CompleteBin_CS08.114	338_1	d__Bacteria	p__Pseudomonadota	c__Gammaproteobacteria	o__Xanthomonadales	f__SZUA-36	g__SZUA-36	s__
CompleteBin_CS10.1233	338_2	d__Bacteria	p__Pseudomonadota	c__Gammaproteobacteria	o__Xanthomonadales	f__SZUA-36	g__SZUA-36	s__
CompleteBin_CS05.419	339_0	d__Bacteria	p__Pseudomonadota	c__Gammaproteobacteria	o__Xanthomonadales	f__SZUA-36	g__SZUA-36	s__
ComeBin_CS05_bin.28880	34_1	d__Bacteria	p__Chloroflexota	c__Anaerolineae	o__Anaerolineales	f__UBA4823	g__DAOVXM01	s__
CompleteBin_CS05.150	34_1	d__Bacteria	p__Chloroflexota	c__Anaerolineae	o__Anaerolineales	f__UBA4823	g__DAOVXM01	s__
CompleteBin_CS05.158	34_1	d__Bacteria	p__Chloroflexota	c__Anaerolineae	o__Anaerolineales	f__UBA4823	g__DAOVXM01	s__
MetaBAT2_CS05_bin.132	34_1	d__Bacteria	p__Chloroflexota	c__Anaerolineae	o__Anaerolineales	f__UBA4823	g__DAOVXM01	s__
SemiBin2_CS05_SemiBin.61	34_1	d__Bacteria	p__Chloroflexota	c__Anaerolineae	o__Anaerolineales	f__UBA4823	g__DAOVXM01	s__
ComeBin_CS12_bin.34557	34_2	d__Bacteria	p__Chloroflexota	c__Anaerolineae	o__Anaerolineales	f__UBA4823	g__DAOVXM01	s__
CompleteBin_CS12.108	34_2	d__Bacteria	p__Chloroflexota	c__Anaerolineae	o__Anaerolineales	f__UBA4823	g__DAOVXM01	s__
MetaBAT2_CS12_bin.56	34_2	d__Bacteria	p__Chloroflexota	c__Anaerolineae	o__Anaerolineales	f__UBA4823	g__DAOVXM01	s__
SemiBin2_CS12_SemiBin.122	34_2	d__Bacteria	p__Chloroflexota	c__Anaerolineae	o__Anaerolineales	f__UBA4823	g__DAOVXM01	s__
ComeBin_CS10_bin.93518	340_1	d__Bacteria	p__Pseudomonadota	c__Gammaproteobacteria	o__Xanthomonadales	f__SZUA-36	g__SZUA-36	s__
CompleteBin_CS10.704	340_1	d__Bacteria	p__Pseudomonadota	c__Gammaproteobacteria	o__Xanthomonadales	f__SZUA-36	g__SZUA-36	s__
CompleteBin_CS10.705	340_1	d__Bacteria	p__Pseudomonadota	c__Gammaproteobacteria	o__Xanthomonadales	f__SZUA-36	g__SZUA-36	s__
ComeBin_CS10_bin.74617	341_1	d__Bacteria	p__Pseudomonadota	c__Gammaproteobacteria	o__Xanthomonadales	f__SZUA-36	g__SZUA-36	s__
CompleteBin_CS10.637	341_1	d__Bacteria	p__Pseudomonadota	c__Gammaproteobacteria	o__Xanthomonadales	f__SZUA-36	g__SZUA-36	s__
CompleteBin_CS08.302	341_2	d__Bacteria	p__Pseudomonadota	c__Gammaproteobacteria	o__Xanthomonadales	f__SZUA-36	g__SZUA-36	s__
ComeBin_CS05_bin.50757	342_1	d__Bacteria	p__Pseudomonadota	c__Gammaproteobacteria	o__Xanthomonadales	f__SZUA-36	g__SZUA-36	s__
CompleteBin_CS05.165	342_1	d__Bacteria	p__Pseudomonadota	c__Gammaproteobacteria	o__Xanthomonadales	f__SZUA-36	g__SZUA-36	s__
CompleteBin_CS05.167	342_1	d__Bacteria	p__Pseudomonadota	c__Gammaproteobacteria	o__Xanthomonadales	f__SZUA-36	g__SZUA-36	s__
CONCOCT_CS01_bin.146	343_1	d__Bacteria	p__Pseudomonadota	c__Gammaproteobacteria	o__Xanthomonadales	f__SZUA-36	g__SZUA-36	s__
ComeBin_CS01_bin.147069	343_1	d__Bacteria	p__Pseudomonadota	c__Gammaproteobacteria	o__Xanthomonadales	f__SZUA-36	g__SZUA-36	s__
CompleteBin_CS01.567	343_1	d__Bacteria	p__Pseudomonadota	c__Gammaproteobacteria	o__Xanthomonadales	f__SZUA-36	g__SZUA-36	s__
VAMB_CS01_bin.14867	343_1	d__Bacteria	p__Pseudomonadota	c__Gammaproteobacteria	o__Xanthomonadales	f__SZUA-36	g__SZUA-36	s__
CONCOCT_CS12_bin.57	343_2	d__Bacteria	p__Pseudomonadota	c__Gammaproteobacteria	o__Xanthomonadales	f__SZUA-36	g__SZUA-36	s__
ComeBin_CS12_bin.190142	343_2	d__Bacteria	p__Pseudomonadota	c__Gammaproteobacteria	o__Xanthomonadales	f__SZUA-36	g__SZUA-36	s__
VAMB_CS12_bin.13935	343_2	d__Bacteria	p__Pseudomonadota	c__Gammaproteobacteria	o__Xanthomonadales	f__SZUA-36	g__SZUA-36	s__
CompleteBin_CS08.320	343_3	d__Bacteria	p__Pseudomonadota	c__Gammaproteobacteria	o__Xanthomonadales	f__SZUA-36	g__SZUA-36	s__
ComeBin_CS08_bin.173829	344_1	d__Bacteria	p__Verrucomicrobiota	c__Kiritimatiellia	o__UBA8416	f__UBA8416	g__JABGOW01	s__
CompleteBin_CS08.191	344_1	d__Bacteria	p__Verrucomicrobiota	c__Kiritimatiellia	o__UBA8416	f__UBA8416	g__JABGOW01	s__
CompleteBin_CS08.254	344_1	d__Bacteria	p__Verrucomicrobiota	c__Kiritimatiellia	o__UBA8416	f__UBA8416	g__JABGOW01	s__
CompleteBin_CS05.500	345_1	d__Bacteria	p__Pseudomonadota	c__Gammaproteobacteria	o__Methylococcales	f__Methylomonadaceae	g__QPIN01	s__
CompleteBin_CS05.81	345_1	d__Bacteria	p__Pseudomonadota	c__Gammaproteobacteria	o__Methylococcales	f__Methylomonadaceae	g__QPIN01	s__
CompleteBin_CS08.246	346_1	d__Bacteria	p__Pseudomonadota	c__Gammaproteobacteria	o__Methylococcales	f__Methylomonadaceae	g__	s__
CompleteBin_CS08.247	346_1	d__Bacteria	p__Pseudomonadota	c__Gammaproteobacteria	o__Methylococcales	f__Methylomonadaceae	g__	s__
CONCOCT_CS12_bin.164	346_2	d__Bacteria	p__Pseudomonadota	c__Gammaproteobacteria	o__Methylococcales	f__Methylomonadaceae	g__QPIN01	s__
ComeBin_CS12_bin.172321	346_2	d__Bacteria	p__Pseudomonadota	c__Gammaproteobacteria	o__Methylococcales	f__Methylomonadaceae	g__QPIN01	s__
CompleteBin_CS12.141	346_2	d__Bacteria	p__Pseudomonadota	c__Gammaproteobacteria	o__Methylococcales	f__Methylomonadaceae	g__QPIN01	s__
CompleteBin_CS12.328	346_2	d__Bacteria	p__Pseudomonadota	c__Gammaproteobacteria	o__Methylococcales	f__Methylomonadaceae	g__QPIN01	s__
CompleteBin_CS12.329	346_2	d__Bacteria	p__Pseudomonadota	c__Gammaproteobacteria	o__Methylococcales	f__Methylomonadaceae	g__QPIN01	s__
CompleteBin_CS10.974	346_3	d__Bacteria	p__Pseudomonadota	c__Gammaproteobacteria	o__Methylococcales	f__Methylomonadaceae	g__QPIN01	s__
ComeBin_CS08_bin.165666	347_1	d__Bacteria	p__Pseudomonadota	c__Gammaproteobacteria	o__GRL18	f__GRL18	g__GRL18	s__
CompleteBin_CS08.192	347_1	d__Bacteria	p__Pseudomonadota	c__Gammaproteobacteria	o__GRL18	f__GRL18	g__GRL18	s__
MetaBAT2_CS08_bin.159	347_1	d__Bacteria	p__Pseudomonadota	c__Gammaproteobacteria	o__GRL18	f__GRL18	g__GRL18	s__
ComeBin_CS10_bin.112278	347_2	d__Bacteria	p__Pseudomonadota	c__Gammaproteobacteria	o__GRL18	f__GRL18	g__GRL18	s__
CompleteBin_CS10.1349	347_2	d__Bacteria	p__Pseudomonadota	c__Gammaproteobacteria	o__GRL18	f__GRL18	g__GRL18	s__
CompleteBin_CS10.1358	347_2	d__Bacteria	p__Pseudomonadota	c__Gammaproteobacteria	o__GRL18	f__GRL18	g__GRL18	s__
CompleteBin_CS10.1368	347_2	d__Bacteria	p__Pseudomonadota	c__Gammaproteobacteria	o__GRL18	f__GRL18	g__GRL18	s__
CompleteBin_CS10.735	347_2	d__Bacteria	p__Pseudomonadota	c__Gammaproteobacteria	o__GRL18	f__GRL18	g__GRL18	s__
ComeBin_CS08_bin.88426	348_0	d__Bacteria	p__Pseudomonadota	c__Gammaproteobacteria	o__GRL18	f__GRL18	g__GRL18	s__
CompleteBin_CS12.584	349_0	d__Bacteria	p__Pseudomonadota	c__Gammaproteobacteria	o__GRL18	f__GRL18	g__GRL18	s__
ComeBin_CS05_bin.1849	35_1	d__Bacteria	p__Chloroflexota	c__Anaerolineae	o__Anaerolineales	f__UBA4823	g__DAOVXM01	s__DAOVXM01 sp030636125
CompleteBin_CS05.148	35_1	d__Bacteria	p__Chloroflexota	c__Anaerolineae	o__Anaerolineales	f__UBA4823	g__DAOVXM01	s__DAOVXM01 sp030636125
CompleteBin_CS05.166	35_1	d__Bacteria	p__Chloroflexota	c__Anaerolineae	o__Anaerolineales	f__UBA4823	g__DAOVXM01	s__DAOVXM01 sp030636125
MetaBAT2_CS05_bin.124	35_1	d__Bacteria	p__Chloroflexota	c__Anaerolineae	o__Anaerolineales	f__UBA4823	g__DAOVXM01	s__DAOVXM01 sp030636125
SemiBin2_CS05_SemiBin.9	35_1	d__Bacteria	p__Chloroflexota	c__Anaerolineae	o__Anaerolineales	f__UBA4823	g__DAOVXM01	s__DAOVXM01 sp030636125
ComeBin_CS12_bin.1242	35_2	d__Bacteria	p__Chloroflexota	c__Anaerolineae	o__Anaerolineales	f__UBA4823	g__DAOVXM01	s__DAOVXM01 sp030636125
CompleteBin_CS12.118	35_2	d__Bacteria	p__Chloroflexota	c__Anaerolineae	o__Anaerolineales	f__UBA4823	g__DAOVXM01	s__DAOVXM01 sp030636125
CompleteBin_CS12.96	35_2	d__Bacteria	p__Chloroflexota	c__Anaerolineae	o__Anaerolineales	f__UBA4823	g__DAOVXM01	s__DAOVXM01 sp030636125
SemiBin2_CS12_SemiBin.21	35_2	d__Bacteria	p__Chloroflexota	c__Anaerolineae	o__Anaerolineales	f__UBA4823	g__DAOVXM01	s__DAOVXM01 sp030636125
CONCOCT_CS05_bin.57	350_1	d__Bacteria	p__Pseudomonadota	c__Gammaproteobacteria	o__GRL18	f__GRL18	g__GRL18	s__GRL18 sp013139395
ComeBin_CS05_bin.51751	350_1	d__Bacteria	p__Pseudomonadota	c__Gammaproteobacteria	o__GRL18	f__GRL18	g__GRL18	s__GRL18 sp013139395
CompleteBin_CS05.169	350_1	d__Bacteria	p__Pseudomonadota	c__Gammaproteobacteria	o__GRL18	f__GRL18	g__GRL18	s__GRL18 sp013139395
MetaBAT2_CS05_bin.99	350_1	d__Bacteria	p__Pseudomonadota	c__Gammaproteobacteria	o__GRL18	f__GRL18	g__GRL18	s__GRL18 sp013139395
SemiBin2_CS05_SemiBin.101	350_1	d__Bacteria	p__Pseudomonadota	c__Gammaproteobacteria	o__GRL18	f__GRL18	g__GRL18	s__GRL18 sp013139395
CONCOCT_CS03_bin.147	350_2	d__Bacteria	p__Pseudomonadota	c__Gammaproteobacteria	o__GRL18	f__GRL18	g__GRL18	s__GRL18 sp013139395
ComeBin_CS03_bin.81611	350_2	d__Bacteria	p__Pseudomonadota	c__Gammaproteobacteria	o__GRL18	f__GRL18	g__GRL18	s__GRL18 sp013139395
CompleteBin_CS03.224	350_2	d__Bacteria	p__Pseudomonadota	c__Gammaproteobacteria	o__GRL18	f__GRL18	g__GRL18	s__GRL18 sp013139395
MetaBAT2_CS03_bin.11	350_2	d__Bacteria	p__Pseudomonadota	c__Gammaproteobacteria	o__GRL18	f__GRL18	g__GRL18	s__GRL18 sp013139395
SemiBin2_CS03_SemiBin.246	350_2	d__Bacteria	p__Pseudomonadota	c__Gammaproteobacteria	o__GRL18	f__GRL18	g__GRL18	s__GRL18 sp013139395
VAMB_CS03_bin.14724	350_2	d__Bacteria	p__Pseudomonadota	c__Gammaproteobacteria	o__GRL18	f__GRL18	g__GRL18	s__GRL18 sp013139395
ComeBin_CS12_bin.29220	351_1	d__Bacteria	p__Pseudomonadota	c__Gammaproteobacteria	o__GRL18	f__GRL18	g__GRL18	s__
CompleteBin_CS12.50	351_1	d__Bacteria	p__Pseudomonadota	c__Gammaproteobacteria	o__GRL18	f__GRL18	g__GRL18	s__
MetaBAT2_CS12_bin.25	351_1	d__Bacteria	p__Pseudomonadota	c__Gammaproteobacteria	o__GRL18	f__GRL18	g__GRL18	s__
SemiBin2_CS12_SemiBin.115	351_1	d__Bacteria	p__Pseudomonadota	c__Gammaproteobacteria	o__GRL18	f__GRL18	g__GRL18	s__
CONCOCT_CS10_bin.13	351_2	d__Bacteria	p__Pseudomonadota	c__Gammaproteobacteria	o__GRL18	f__GRL18	g__GRL18	s__
ComeBin_CS10_bin.20072	351_2	d__Bacteria	p__Pseudomonadota	c__Gammaproteobacteria	o__GRL18	f__GRL18	g__GRL18	s__
CompleteBin_CS10.1175	351_2	d__Bacteria	p__Pseudomonadota	c__Gammaproteobacteria	o__GRL18	f__GRL18	g__GRL18	s__
MetaBAT2_CS10_bin.23	351_2	d__Bacteria	p__Pseudomonadota	c__Gammaproteobacteria	o__GRL18	f__GRL18	g__GRL18	s__
SemiBin2_CS10_SemiBin.56	351_2	d__Bacteria	p__Pseudomonadota	c__Gammaproteobacteria	o__GRL18	f__GRL18	g__GRL18	s__
VAMB_CS10_bin.16003	351_2	d__Bacteria	p__Pseudomonadota	c__Gammaproteobacteria	o__GRL18	f__GRL18	g__GRL18	s__
ComeBin_CS08_bin.72553	352_1	d__Bacteria	p__Pseudomonadota	c__Gammaproteobacteria	o__GRL18	f__GRL18	g__GRL18	s__GRL18 sp030632625
CompleteBin_CS08.123	352_1	d__Bacteria	p__Pseudomonadota	c__Gammaproteobacteria	o__GRL18	f__GRL18	g__GRL18	s__GRL18 sp030632625
MetaBAT2_CS08_bin.124	352_1	d__Bacteria	p__Pseudomonadota	c__Gammaproteobacteria	o__GRL18	f__GRL18	g__GRL18	s__GRL18 sp030632625
ComeBin_CS12_bin.57917	352_2	d__Bacteria	p__Pseudomonadota	c__Gammaproteobacteria	o__GRL18	f__GRL18	g__GRL18	s__GRL18 sp030632625
CompleteBin_CS12.113	352_2	d__Bacteria	p__Pseudomonadota	c__Gammaproteobacteria	o__GRL18	f__GRL18	g__GRL18	s__GRL18 sp030632625
MetaBAT2_CS12_bin.42	352_2	d__Bacteria	p__Pseudomonadota	c__Gammaproteobacteria	o__GRL18	f__GRL18	g__GRL18	s__GRL18 sp030632625
SemiBin2_CS12_SemiBin.179	352_2	d__Bacteria	p__Pseudomonadota	c__Gammaproteobacteria	o__GRL18	f__GRL18	g__GRL18	s__GRL18 sp030632625
ComeBin_CS10_bin.61217	352_3	d__Bacteria	p__Pseudomonadota	c__Gammaproteobacteria	o__GRL18	f__GRL18	g__GRL18	s__GRL18 sp030632625
CompleteBin_CS10.1154	352_3	d__Bacteria	p__Pseudomonadota	c__Gammaproteobacteria	o__GRL18	f__GRL18	g__GRL18	s__GRL18 sp030632625
CompleteBin_CS10.891	352_3	d__Bacteria	p__Pseudomonadota	c__Gammaproteobacteria	o__GRL18	f__GRL18	g__GRL18	s__GRL18 sp030632625
CompleteBin_CS10.975	352_3	d__Bacteria	p__Pseudomonadota	c__Gammaproteobacteria	o__GRL18	f__GRL18	g__GRL18	s__GRL18 sp030632625
MetaBAT2_CS10_bin.137	352_3	d__Bacteria	p__Pseudomonadota	c__Gammaproteobacteria	o__GRL18	f__GRL18	g__GRL18	s__GRL18 sp030632625
SemiBin2_CS10_SemiBin.128	352_3	d__Bacteria	p__Pseudomonadota	c__Gammaproteobacteria	o__GRL18	f__GRL18	g__GRL18	s__GRL18 sp030632625
VAMB_CS10_bin.10959	352_3	d__Bacteria	p__Pseudomonadota	c__Gammaproteobacteria	o__GRL18	f__GRL18	g__GRL18	s__GRL18 sp030632625
ComeBin_CS01_bin.242883	353_1	d__Bacteria	p__Pseudomonadota	c__Gammaproteobacteria	o__GRL18	f__GRL18	g__GRL18	s__GRL18 sp028571885
CompleteBin_CS01.843	353_1	d__Bacteria	p__Pseudomonadota	c__Gammaproteobacteria	o__GRL18	f__GRL18	g__GRL18	s__GRL18 sp028571885
ComeBin_CS12_bin.109677	353_2	d__Bacteria	p__Pseudomonadota	c__Gammaproteobacteria	o__GRL18	f__GRL18	g__GRL18	s__GRL18 sp028571885
CompleteBin_CS12.254	353_2	d__Bacteria	p__Pseudomonadota	c__Gammaproteobacteria	o__GRL18	f__GRL18	g__GRL18	s__GRL18 sp028571885
MetaBAT2_CS12_bin.127	353_2	d__Bacteria	p__Pseudomonadota	c__Gammaproteobacteria	o__GRL18	f__GRL18	g__GRL18	s__GRL18 sp028571885
VAMB_CS12_bin.12410	353_2	d__Bacteria	p__Pseudomonadota	c__Gammaproteobacteria	o__GRL18	f__GRL18	g__GRL18	s__GRL18 sp028571885
CONCOCT_CS10_bin.129	353_3	d__Bacteria	p__Pseudomonadota	c__Gammaproteobacteria	o__GRL18	f__GRL18	g__GRL18	s__GRL18 sp028571885
ComeBin_CS10_bin.33885	353_3	d__Bacteria	p__Pseudomonadota	c__Gammaproteobacteria	o__GRL18	f__GRL18	g__GRL18	s__GRL18 sp028571885
CompleteBin_CS10.221	353_3	d__Bacteria	p__Pseudomonadota	c__Gammaproteobacteria	o__GRL18	f__GRL18	g__GRL18	s__GRL18 sp028571885
MetaBAT2_CS10_bin.106	353_3	d__Bacteria	p__Pseudomonadota	c__Gammaproteobacteria	o__GRL18	f__GRL18	g__GRL18	s__GRL18 sp028571885
SemiBin2_CS10_SemiBin.80	353_3	d__Bacteria	p__Pseudomonadota	c__Gammaproteobacteria	o__GRL18	f__GRL18	g__GRL18	s__GRL18 sp028571885
VAMB_CS10_bin.18970	353_3	d__Bacteria	p__Pseudomonadota	c__Gammaproteobacteria	o__GRL18	f__GRL18	g__GRL18	s__GRL18 sp028571885
CONCOCT_CS08_bin.70	353_4	d__Bacteria	p__Pseudomonadota	c__Gammaproteobacteria	o__GRL18	f__GRL18	g__GRL18	s__GRL18 sp028571885
ComeBin_CS08_bin.45347	353_4	d__Bacteria	p__Pseudomonadota	c__Gammaproteobacteria	o__GRL18	f__GRL18	g__GRL18	s__GRL18 sp028571885
CompleteBin_CS08.68	353_4	d__Bacteria	p__Pseudomonadota	c__Gammaproteobacteria	o__GRL18	f__GRL18	g__GRL18	s__GRL18 sp028571885
MetaBAT2_CS08_bin.27	353_4	d__Bacteria	p__Pseudomonadota	c__Gammaproteobacteria	o__GRL18	f__GRL18	g__GRL18	s__GRL18 sp028571885
SemiBin2_CS08_SemiBin.97	353_4	d__Bacteria	p__Pseudomonadota	c__Gammaproteobacteria	o__GRL18	f__GRL18	g__GRL18	s__GRL18 sp028571885
VAMB_CS08_bin.14361	353_4	d__Bacteria	p__Pseudomonadota	c__Gammaproteobacteria	o__GRL18	f__GRL18	g__GRL18	s__GRL18 sp028571885
ComeBin_CS10_bin.51948	354_1	d__Bacteria	p__Pseudomonadota	c__Gammaproteobacteria	o__GRL18	f__GRL18	g__	s__
CompleteBin_CS10.625	354_1	d__Bacteria	p__Pseudomonadota	c__Gammaproteobacteria	o__GRL18	f__GRL18	g__	s__
CompleteBin_CS10.626	354_1	d__Bacteria	p__Pseudomonadota	c__Gammaproteobacteria	o__GRL18	f__GRL18	g__	s__
MetaBAT2_CS10_bin.118	354_1	d__Bacteria	p__Pseudomonadota	c__Gammaproteobacteria	o__GRL18	f__GRL18	g__	s__
CompleteBin_CS12.497	354_2	d__Bacteria	p__Pseudomonadota	c__Gammaproteobacteria	o__GRL18	f__GRL18	g__GRL18	s__
ComeBin_CS10_bin.157321	355_1	d__Bacteria	p__Pseudomonadota	c__Gammaproteobacteria	o__Chromatiales	f__Sedimenticolaceae	g__	s__
CompleteBin_CS10.196	355_1	d__Bacteria	p__Pseudomonadota	c__Gammaproteobacteria	o__Chromatiales	f__Sedimenticolaceae	g__	s__
CompleteBin_CS10.505	355_1	d__Bacteria	p__Pseudomonadota	c__Gammaproteobacteria	o__Chromatiales	f__Sedimenticolaceae	g__	s__
CompleteBin_CS10.80	355_1	d__Bacteria	p__Pseudomonadota	c__Gammaproteobacteria	o__Chromatiales	f__Sedimenticolaceae	g__	s__
CompleteBin_CS10.833	355_1	d__Bacteria	p__Pseudomonadota	c__Gammaproteobacteria	o__Chromatiales	f__Sedimenticolaceae	g__	s__
CompleteBin_CS08.208	355_2	d__Bacteria	p__Pseudomonadota	c__Gammaproteobacteria	o__Chromatiales	f__Sedimenticolaceae	g__	s__
CONCOCT_CS10_bin.64	356_0	Unclassified
ComeBin_CS08_bin.5178	357_1	d__Bacteria	p__Pseudomonadota	c__Gammaproteobacteria	o__UBA9214	f__UBA9214	g__SZUA-186	s__SZUA-186 sp030599705
CompleteBin_CS08.130	357_1	d__Bacteria	p__Pseudomonadota	c__Gammaproteobacteria	o__UBA9214	f__UBA9214	g__SZUA-186	s__SZUA-186 sp030599705
MetaBAT2_CS08_bin.106	357_1	d__Bacteria	p__Pseudomonadota	c__Gammaproteobacteria	o__UBA9214	f__UBA9214	g__SZUA-186	s__SZUA-186 sp030599705
SemiBin2_CS08_SemiBin.21	357_1	d__Bacteria	p__Pseudomonadota	c__Gammaproteobacteria	o__UBA9214	f__UBA9214	g__SZUA-186	s__SZUA-186 sp030599705
VAMB_CS08_bin.36356	357_1	d__Bacteria	p__Pseudomonadota	c__Gammaproteobacteria	o__UBA9214	f__UBA9214	g__SZUA-186	s__SZUA-186 sp030599705
CONCOCT_CS05_bin.112	357_2	d__Bacteria	p__Pseudomonadota	c__Gammaproteobacteria	o__UBA9214	f__UBA9214	g__SZUA-186	s__SZUA-186 sp030599705
ComeBin_CS05_bin.16989	357_2	d__Bacteria	p__Pseudomonadota	c__Gammaproteobacteria	o__UBA9214	f__UBA9214	g__SZUA-186	s__SZUA-186 sp030599705
CompleteBin_CS05.192	357_2	d__Bacteria	p__Pseudomonadota	c__Gammaproteobacteria	o__UBA9214	f__UBA9214	g__SZUA-186	s__SZUA-186 sp030599705
MetaBAT2_CS05_bin.49	357_2	d__Bacteria	p__Pseudomonadota	c__Gammaproteobacteria	o__UBA9214	f__UBA9214	g__SZUA-186	s__SZUA-186 sp030599705
SemiBin2_CS05_SemiBin.44	357_2	d__Bacteria	p__Pseudomonadota	c__Gammaproteobacteria	o__UBA9214	f__UBA9214	g__SZUA-186	s__SZUA-186 sp030599705
CompleteBin_CS03.273	357_3	d__Bacteria	p__Pseudomonadota	c__Gammaproteobacteria	o__UBA9214	f__UBA9214	g__SZUA-186	s__
ComeBin_CS08_bin.122690	358_1	d__Bacteria	p__Pseudomonadota	c__Gammaproteobacteria	o__UBA9214	f__UBA9214	g__	s__
CompleteBin_CS08.228	358_1	d__Bacteria	p__Pseudomonadota	c__Gammaproteobacteria	o__UBA9214	f__UBA9214	g__	s__
CompleteBin_CS08.59	358_1	d__Bacteria	p__Pseudomonadota	c__Gammaproteobacteria	o__UBA9214	f__UBA9214	g__	s__
CompleteBin_CS05.272	359_0	d__Bacteria	p__Pseudomonadota	c__Gammaproteobacteria	o__UBA9214	f__UBA9214	g__UBA9214	s__
ComeBin_CS05_bin.23014	36_1	d__Bacteria	p__Chloroflexota	c__Anaerolineae	o__Anaerolineales	f__UBA4823	g__JAUWPO01	s__
CompleteBin_CS05.128	36_1	d__Bacteria	p__Chloroflexota	c__Anaerolineae	o__Anaerolineales	f__UBA4823	g__JAUWPO01	s__
MetaBAT2_CS05_bin.39	36_1	d__Bacteria	p__Chloroflexota	c__Anaerolineae	o__Anaerolineales	f__UBA4823	g__JAUWPO01	s__
SemiBin2_CS05_SemiBin.53	36_1	d__Bacteria	p__Chloroflexota	c__Anaerolineae	o__Anaerolineales	f__UBA4823	g__JAUWPO01	s__
ComeBin_CS12_bin.9998	36_2	d__Bacteria	p__Chloroflexota	c__Anaerolineae	o__Anaerolineales	f__UBA4823	g__JAUWPO01	s__
CompleteBin_CS12.487	36_2	d__Bacteria	p__Chloroflexota	c__Anaerolineae	o__Anaerolineales	f__UBA4823	g__JAUWPO01	s__
CompleteBin_CS12.520	36_2	d__Bacteria	p__Chloroflexota	c__Anaerolineae	o__Anaerolineales	f__UBA4823	g__JAUWPO01	s__
MetaBAT2_CS12_bin.24	36_2	d__Bacteria	p__Chloroflexota	c__Anaerolineae	o__Anaerolineales	f__UBA4823	g__JAUWPO01	s__
SemiBin2_CS12_SemiBin.54	36_2	d__Bacteria	p__Chloroflexota	c__Anaerolineae	o__Anaerolineales	f__UBA4823	g__JAUWPO01	s__
ComeBin_CS03_bin.40323	36_3	d__Bacteria	p__Chloroflexota	c__Anaerolineae	o__Anaerolineales	f__UBA4823	g__JAUWPO01	s__
CompleteBin_CS03.76	36_3	d__Bacteria	p__Chloroflexota	c__Anaerolineae	o__Anaerolineales	f__UBA4823	g__JAUWPO01	s__
SemiBin2_CS03_SemiBin.143	36_3	d__Bacteria	p__Chloroflexota	c__Anaerolineae	o__Anaerolineales	f__UBA4823	g__JAUWPO01	s__
VAMB_CS03_bin.14575	36_3	d__Bacteria	p__Chloroflexota	c__Anaerolineae	o__Anaerolineales	f__UBA4823	g__JAUWPO01	s__
ComeBin_CS08_bin.65636	360_1	d__Bacteria	p__Pseudomonadota	c__Gammaproteobacteria	o__UBA9214	f__UBA9214	g__UBA9214	s__
CompleteBin_CS08.112	360_1	d__Bacteria	p__Pseudomonadota	c__Gammaproteobacteria	o__UBA9214	f__UBA9214	g__UBA9214	s__
SemiBin2_CS08_SemiBin.127	360_1	d__Bacteria	p__Pseudomonadota	c__Gammaproteobacteria	o__UBA9214	f__UBA9214	g__UBA9214	s__
CompleteBin_CS10.1234	360_2	d__Bacteria	p__Pseudomonadota	c__Gammaproteobacteria	o__UBA9214	f__UBA9214	g__UBA9214	s__
ComeBin_CS05_bin.2920	361_1	d__Bacteria	p__Pseudomonadota	c__Gammaproteobacteria	o__UBA9214	f__UBA9214	g__UBA9214	s__
CompleteBin_CS05.175	361_1	d__Bacteria	p__Pseudomonadota	c__Gammaproteobacteria	o__UBA9214	f__UBA9214	g__UBA9214	s__
SemiBin2_CS05_SemiBin.10	361_1	d__Bacteria	p__Pseudomonadota	c__Gammaproteobacteria	o__UBA9214	f__UBA9214	g__UBA9214	s__
ComeBin_CS08_bin.50858	362_1	d__Bacteria	p__Pseudomonadota	c__Gammaproteobacteria	o__UBA9214	f__UBA9214	g__UBA9214	s__
CompleteBin_CS08.75	362_1	d__Bacteria	p__Pseudomonadota	c__Gammaproteobacteria	o__UBA9214	f__UBA9214	g__UBA9214	s__
MetaBAT2_CS08_bin.42	362_1	d__Bacteria	p__Pseudomonadota	c__Gammaproteobacteria	o__UBA9214	f__UBA9214	g__UBA9214	s__
VAMB_CS08_bin.26194	362_1	d__Bacteria	p__Pseudomonadota	c__Gammaproteobacteria	o__UBA9214	f__UBA9214	g__UBA9214	s__
ComeBin_CS10_bin.32208	362_2	d__Bacteria	p__Pseudomonadota	c__Gammaproteobacteria	o__UBA9214	f__UBA9214	g__UBA9214	s__
CompleteBin_CS10.145	362_2	d__Bacteria	p__Pseudomonadota	c__Gammaproteobacteria	o__UBA9214	f__UBA9214	g__UBA9214	s__
MetaBAT2_CS10_bin.64	362_2	d__Bacteria	p__Pseudomonadota	c__Gammaproteobacteria	o__UBA9214	f__UBA9214	g__UBA9214	s__
SemiBin2_CS10_SemiBin.76	362_2	d__Bacteria	p__Pseudomonadota	c__Gammaproteobacteria	o__UBA9214	f__UBA9214	g__UBA9214	s__
VAMB_CS10_bin.14981	362_2	d__Bacteria	p__Pseudomonadota	c__Gammaproteobacteria	o__UBA9214	f__UBA9214	g__UBA9214	s__
CONCOCT_CS03_bin.126	363_1	d__Bacteria	p__Pseudomonadota	c__Gammaproteobacteria	o__UBA9214	f__UBA9214	g__UBA9214	s__
ComeBin_CS03_bin.26805	363_1	d__Bacteria	p__Pseudomonadota	c__Gammaproteobacteria	o__UBA9214	f__UBA9214	g__UBA9214	s__
CompleteBin_CS03.47	363_1	d__Bacteria	p__Pseudomonadota	c__Gammaproteobacteria	o__UBA9214	f__UBA9214	g__UBA9214	s__
MetaBAT2_CS03_bin.2	363_1	d__Bacteria	p__Pseudomonadota	c__Gammaproteobacteria	o__UBA9214	f__UBA9214	g__UBA9214	s__
SemiBin2_CS03_SemiBin.112	363_1	d__Bacteria	p__Pseudomonadota	c__Gammaproteobacteria	o__UBA9214	f__UBA9214	g__UBA9214	s__
VAMB_CS03_bin.15625	363_1	d__Bacteria	p__Pseudomonadota	c__Gammaproteobacteria	o__UBA9214	f__UBA9214	g__UBA9214	s__
CONCOCT_CS08_bin.169	363_2	d__Bacteria	p__Pseudomonadota	c__Gammaproteobacteria	o__UBA9214	f__UBA9214	g__UBA9214	s__
ComeBin_CS08_bin.103454	363_2	d__Bacteria	p__Pseudomonadota	c__Gammaproteobacteria	o__UBA9214	f__UBA9214	g__UBA9214	s__
CompleteBin_CS08.184	363_2	d__Bacteria	p__Pseudomonadota	c__Gammaproteobacteria	o__UBA9214	f__UBA9214	g__UBA9214	s__
MetaBAT2_CS08_bin.51	363_2	d__Bacteria	p__Pseudomonadota	c__Gammaproteobacteria	o__UBA9214	f__UBA9214	g__UBA9214	s__
VAMB_CS08_bin.25323	363_2	d__Bacteria	p__Pseudomonadota	c__Gammaproteobacteria	o__UBA9214	f__UBA9214	g__UBA9214	s__
CONCOCT_CS10_bin.21	363_3	d__Bacteria	p__Pseudomonadota	c__Gammaproteobacteria	o__UBA9214	f__UBA9214	g__UBA9214	s__
ComeBin_CS10_bin.99871	363_3	d__Bacteria	p__Pseudomonadota	c__Gammaproteobacteria	o__UBA9214	f__UBA9214	g__UBA9214	s__
CompleteBin_CS10.715	363_3	d__Bacteria	p__Pseudomonadota	c__Gammaproteobacteria	o__UBA9214	f__UBA9214	g__UBA9214	s__
MetaBAT2_CS10_bin.115	363_3	d__Bacteria	p__Pseudomonadota	c__Gammaproteobacteria	o__UBA9214	f__UBA9214	g__UBA9214	s__
VAMB_CS10_bin.31066	363_3	d__Bacteria	p__Pseudomonadota	c__Gammaproteobacteria	o__UBA9214	f__UBA9214	g__UBA9214	s__
ComeBin_CS12_bin.71241	363_4	d__Bacteria	p__Pseudomonadota	c__Gammaproteobacteria	o__UBA9214	f__UBA9214	g__UBA9214	s__
CompleteBin_CS12.148	363_4	d__Bacteria	p__Pseudomonadota	c__Gammaproteobacteria	o__UBA9214	f__UBA9214	g__UBA9214	s__
MetaBAT2_CS12_bin.133	363_4	d__Bacteria	p__Pseudomonadota	c__Gammaproteobacteria	o__UBA9214	f__UBA9214	g__UBA9214	s__
SemiBin2_CS12_SemiBin.214	363_4	d__Bacteria	p__Pseudomonadota	c__Gammaproteobacteria	o__UBA9214	f__UBA9214	g__UBA9214	s__
VAMB_CS12_bin.15791	363_4	d__Bacteria	p__Pseudomonadota	c__Gammaproteobacteria	o__UBA9214	f__UBA9214	g__UBA9214	s__
ComeBin_CS08_bin.46858	364_1	d__Bacteria	p__Pseudomonadota	c__Gammaproteobacteria	o__UBA9214	f__UBA9214	g__UBA9214	s__
CompleteBin_CS08.1379	364_1	d__Bacteria	p__Pseudomonadota	c__Gammaproteobacteria	o__UBA9214	f__UBA9214	g__UBA9214	s__
CompleteBin_CS08.70	364_1	d__Bacteria	p__Pseudomonadota	c__Gammaproteobacteria	o__UBA9214	f__UBA9214	g__UBA9214	s__
ComeBin_CS05_bin.66419	365_1	d__Bacteria	p__Pseudomonadota	c__Gammaproteobacteria	o__UBA9214	f__UBA9214	g__UBA9214	s__
CompleteBin_CS05.221	365_1	d__Bacteria	p__Pseudomonadota	c__Gammaproteobacteria	o__UBA9214	f__UBA9214	g__UBA9214	s__
CompleteBin_CS05.222	365_1	d__Bacteria	p__Pseudomonadota	c__Gammaproteobacteria	o__UBA9214	f__UBA9214	g__UBA9214	s__
ComeBin_CS05_bin.84605	366_0	d__Bacteria	p__Pseudomonadota	c__Gammaproteobacteria	o__UBA9214	f__UBA9214	g__UBA9214	s__
ComeBin_CS08_bin.38281	367_1	d__Bacteria	p__Pseudomonadota	c__Gammaproteobacteria	o__DSM-19610	f__DSM-19610	g__Thiogranum	s__
CompleteBin_CS08.50	367_1	d__Bacteria	p__Pseudomonadota	c__Gammaproteobacteria	o__DSM-19610	f__DSM-19610	g__Thiogranum	s__
CompleteBin_CS08.866	367_1	d__Bacteria	p__Pseudomonadota	c__Gammaproteobacteria	o__DSM-19610	f__DSM-19610	g__Thiogranum	s__
MetaBAT2_CS08_bin.174	367_1	d__Bacteria	p__Pseudomonadota	c__Gammaproteobacteria	o__DSM-19610	f__DSM-19610	g__Thiogranum	s__
SemiBin2_CS08_SemiBin.83	367_1	d__Bacteria	p__Pseudomonadota	c__Gammaproteobacteria	o__DSM-19610	f__DSM-19610	g__Thiogranum	s__
CONCOCT_CS12_bin.89	368_1	d__Bacteria	p__Pseudomonadota	c__Gammaproteobacteria	o__DSM-19610	f__DSM-19610	g__Thiogranum	s__
ComeBin_CS12_bin.160645	368_1	d__Bacteria	p__Pseudomonadota	c__Gammaproteobacteria	o__DSM-19610	f__DSM-19610	g__Thiogranum	s__
CompleteBin_CS12.406	368_1	d__Bacteria	p__Pseudomonadota	c__Gammaproteobacteria	o__DSM-19610	f__DSM-19610	g__Thiogranum	s__
VAMB_CS12_bin.12470	368_1	d__Bacteria	p__Pseudomonadota	c__Gammaproteobacteria	o__DSM-19610	f__DSM-19610	g__Thiogranum	s__
CONCOCT_CS10_bin.150	368_2	d__Bacteria	p__Pseudomonadota	c__Gammaproteobacteria	o__DSM-19610	f__DSM-19610	g__Thiogranum	s__
ComeBin_CS10_bin.25921	368_2	d__Bacteria	p__Pseudomonadota	c__Gammaproteobacteria	o__DSM-19610	f__DSM-19610	g__Thiogranum	s__
CompleteBin_CS10.1330	368_2	d__Bacteria	p__Pseudomonadota	c__Gammaproteobacteria	o__DSM-19610	f__DSM-19610	g__Thiogranum	s__
CompleteBin_CS10.923	368_2	d__Bacteria	p__Pseudomonadota	c__Gammaproteobacteria	o__DSM-19610	f__DSM-19610	g__Thiogranum	s__
MetaBAT2_CS10_bin.125	368_2	d__Bacteria	p__Pseudomonadota	c__Gammaproteobacteria	o__DSM-19610	f__DSM-19610	g__Thiogranum	s__
SemiBin2_CS10_SemiBin.68	368_2	d__Bacteria	p__Pseudomonadota	c__Gammaproteobacteria	o__DSM-19610	f__DSM-19610	g__Thiogranum	s__
ComeBin_CS08_bin.44638	368_3	d__Bacteria	p__Pseudomonadota	c__Gammaproteobacteria	o__DSM-19610	f__DSM-19610	g__Thiogranum	s__
CompleteBin_CS08.240	368_3	d__Bacteria	p__Pseudomonadota	c__Gammaproteobacteria	o__DSM-19610	f__DSM-19610	g__Thiogranum	s__
MetaBAT2_CS08_bin.128	368_3	d__Bacteria	p__Pseudomonadota	c__Gammaproteobacteria	o__DSM-19610	f__DSM-19610	g__Thiogranum	s__
SemiBin2_CS08_SemiBin.196	368_3	d__Bacteria	p__Pseudomonadota	c__Gammaproteobacteria	o__DSM-19610	f__DSM-19610	g__Thiogranum	s__
ComeBin_CS03_bin.35441	368_4	d__Bacteria	p__Pseudomonadota	c__Gammaproteobacteria	o__DSM-19610	f__DSM-19610	g__Thiogranum	s__
CompleteBin_CS03.51	368_4	d__Bacteria	p__Pseudomonadota	c__Gammaproteobacteria	o__DSM-19610	f__DSM-19610	g__Thiogranum	s__
CompleteBin_CS03.66	368_4	d__Bacteria	p__Pseudomonadota	c__Gammaproteobacteria	o__DSM-19610	f__DSM-19610	g__Thiogranum	s__
MetaBAT2_CS03_bin.56	368_4	d__Bacteria	p__Pseudomonadota	c__Gammaproteobacteria	o__DSM-19610	f__DSM-19610	g__Thiogranum	s__
SemiBin2_CS03_SemiBin.131	368_4	d__Bacteria	p__Pseudomonadota	c__Gammaproteobacteria	o__DSM-19610	f__DSM-19610	g__Thiogranum	s__
CONCOCT_CS05_bin.150	368_5	d__Bacteria	p__Pseudomonadota	c__Gammaproteobacteria	o__DSM-19610	f__DSM-19610	g__Thiogranum	s__
ComeBin_CS05_bin.14489	368_5	d__Bacteria	p__Pseudomonadota	c__Gammaproteobacteria	o__DSM-19610	f__DSM-19610	g__Thiogranum	s__
CompleteBin_CS05.364	368_5	d__Bacteria	p__Pseudomonadota	c__Gammaproteobacteria	o__DSM-19610	f__DSM-19610	g__Thiogranum	s__
CompleteBin_CS05.466	368_5	d__Bacteria	p__Pseudomonadota	c__Gammaproteobacteria	o__DSM-19610	f__DSM-19610	g__Thiogranum	s__
CompleteBin_CS05.477	368_5	d__Bacteria	p__Pseudomonadota	c__Gammaproteobacteria	o__DSM-19610	f__DSM-19610	g__Thiogranum	s__
CompleteBin_CS05.802	368_5	d__Bacteria	p__Pseudomonadota	c__Gammaproteobacteria	o__DSM-19610	f__DSM-19610	g__Thiogranum	s__
MetaBAT2_CS05_bin.98	368_5	d__Bacteria	p__Pseudomonadota	c__Gammaproteobacteria	o__DSM-19610	f__DSM-19610	g__Thiogranum	s__
SemiBin2_CS05_SemiBin.38	368_5	d__Bacteria	p__Pseudomonadota	c__Gammaproteobacteria	o__DSM-19610	f__DSM-19610	g__Thiogranum	s__
ComeBin_CS08_bin.0	369_1	d__Bacteria	p__Pseudomonadota	c__Gammaproteobacteria	o__DSM-19610	f__DSM-19610	g__Thiogranum	s__
CompleteBin_CS08.22	369_1	d__Bacteria	p__Pseudomonadota	c__Gammaproteobacteria	o__DSM-19610	f__DSM-19610	g__Thiogranum	s__
MetaBAT2_CS08_bin.49	369_1	d__Bacteria	p__Pseudomonadota	c__Gammaproteobacteria	o__DSM-19610	f__DSM-19610	g__Thiogranum	s__
SemiBin2_CS08_SemiBin.1	369_1	d__Bacteria	p__Pseudomonadota	c__Gammaproteobacteria	o__DSM-19610	f__DSM-19610	g__Thiogranum	s__
CONCOCT_CS03_bin.158	37_1	d__Bacteria	p__Chloroflexota	c__Anaerolineae	o__Anaerolineales	f__UBA4823	g__JAUWPO01	s__JAUWPO01 sp030622805
ComeBin_CS03_bin.12407	37_1	d__Bacteria	p__Chloroflexota	c__Anaerolineae	o__Anaerolineales	f__UBA4823	g__JAUWPO01	s__JAUWPO01 sp030622805
CompleteBin_CS03.360	37_1	d__Bacteria	p__Chloroflexota	c__Anaerolineae	o__Anaerolineales	f__UBA4823	g__JAUWPO01	s__JAUWPO01 sp030622805
CompleteBin_CS03.627	37_1	d__Bacteria	p__Chloroflexota	c__Anaerolineae	o__Anaerolineales	f__UBA4823	g__JAUWPO01	s__JAUWPO01 sp030622805
MetaBAT2_CS03_bin.55	37_1	d__Bacteria	p__Chloroflexota	c__Anaerolineae	o__Anaerolineales	f__UBA4823	g__JAUWPO01	s__JAUWPO01 sp030622805
SemiBin2_CS03_SemiBin.66	37_1	d__Bacteria	p__Chloroflexota	c__Anaerolineae	o__Anaerolineales	f__UBA4823	g__JAUWPO01	s__JAUWPO01 sp030622805
VAMB_CS03_bin.16823	37_1	d__Bacteria	p__Chloroflexota	c__Anaerolineae	o__Anaerolineales	f__UBA4823	g__JAUWPO01	s__JAUWPO01 sp030622805
CONCOCT_CS08_bin.77	37_2	d__Bacteria	p__Chloroflexota	c__Anaerolineae	o__Anaerolineales	f__UBA4823	g__JAUWPO01	s__JAUWPO01 sp030622805
ComeBin_CS08_bin.99134	37_2	d__Bacteria	p__Chloroflexota	c__Anaerolineae	o__Anaerolineales	f__UBA4823	g__JAUWPO01	s__JAUWPO01 sp030622805
CompleteBin_CS08.181	37_2	d__Bacteria	p__Chloroflexota	c__Anaerolineae	o__Anaerolineales	f__UBA4823	g__JAUWPO01	s__JAUWPO01 sp030622805
MetaBAT2_CS08_bin.126	37_2	d__Bacteria	p__Chloroflexota	c__Anaerolineae	o__Anaerolineales	f__UBA4823	g__JAUWPO01	s__JAUWPO01 sp030622805
SemiBin2_CS08_SemiBin.166	37_2	d__Bacteria	p__Chloroflexota	c__Anaerolineae	o__Anaerolineales	f__UBA4823	g__JAUWPO01	s__JAUWPO01 sp030622805
VAMB_CS08_bin.14102	37_2	d__Bacteria	p__Chloroflexota	c__Anaerolineae	o__Anaerolineales	f__UBA4823	g__JAUWPO01	s__JAUWPO01 sp030622805
ComeBin_CS08_bin.2629	370_1	d__Bacteria	p__Pseudomonadota	c__Gammaproteobacteria	o__DSM-19610	f__DSM-19610	g__Thiogranum	s__Thiogranum sp030618475
CompleteBin_CS08.188	370_1	d__Bacteria	p__Pseudomonadota	c__Gammaproteobacteria	o__DSM-19610	f__DSM-19610	g__Thiogranum	s__Thiogranum sp030618475
CompleteBin_CS08.72	370_1	d__Bacteria	p__Pseudomonadota	c__Gammaproteobacteria	o__DSM-19610	f__DSM-19610	g__Thiogranum	s__Thiogranum sp030618475
MetaBAT2_CS08_bin.21	370_1	d__Bacteria	p__Pseudomonadota	c__Gammaproteobacteria	o__DSM-19610	f__DSM-19610	g__Thiogranum	s__Thiogranum sp030618475
SemiBin2_CS08_SemiBin.17	370_1	d__Bacteria	p__Pseudomonadota	c__Gammaproteobacteria	o__DSM-19610	f__DSM-19610	g__Thiogranum	s__Thiogranum sp030618475
CompleteBin_CS03.272	370_2	d__Bacteria	p__Pseudomonadota	c__Gammaproteobacteria	o__DSM-19610	f__DSM-19610	g__Thiogranum	s__
CompleteBin_CS05.762	371_0	d__Bacteria	p__Pseudomonadota	c__Gammaproteobacteria	o__SLDE01	f__SLDE01	g__JAPHSX01	s__
CONCOCT_CS08_bin.143	372_1	d__Bacteria	p__Pseudomonadota	c__Gammaproteobacteria	o__Pseudomonadales	f__Cellvibrionaceae	g__JAUVQU01	s__JAUVQU01 sp030597965
ComeBin_CS08_bin.207389	372_1	d__Bacteria	p__Pseudomonadota	c__Gammaproteobacteria	o__Pseudomonadales	f__Cellvibrionaceae	g__JAUVQU01	s__JAUVQU01 sp030597965
CompleteBin_CS08.241	372_1	d__Bacteria	p__Pseudomonadota	c__Gammaproteobacteria	o__Pseudomonadales	f__Cellvibrionaceae	g__JAUVQU01	s__JAUVQU01 sp030597965
CompleteBin_CS08.242	372_1	d__Bacteria	p__Pseudomonadota	c__Gammaproteobacteria	o__Pseudomonadales	f__Cellvibrionaceae	g__JAUVQU01	s__JAUVQU01 sp030597965
ComeBin_CS10_bin.541	372_2	d__Bacteria	p__Pseudomonadota	c__Gammaproteobacteria	o__Pseudomonadales	f__Cellvibrionaceae	g__JAUVQU01	s__JAUVQU01 sp030597965
CompleteBin_CS10.264	372_2	d__Bacteria	p__Pseudomonadota	c__Gammaproteobacteria	o__Pseudomonadales	f__Cellvibrionaceae	g__JAUVQU01	s__JAUVQU01 sp030597965
CompleteBin_CS10.372	372_2	d__Bacteria	p__Pseudomonadota	c__Gammaproteobacteria	o__Pseudomonadales	f__Cellvibrionaceae	g__JAUVQU01	s__JAUVQU01 sp030597965
CompleteBin_CS10.692	372_2	d__Bacteria	p__Pseudomonadota	c__Gammaproteobacteria	o__Pseudomonadales	f__Cellvibrionaceae	g__JAUVQU01	s__JAUVQU01 sp030597965
CompleteBin_CS10.699	372_2	d__Bacteria	p__Pseudomonadota	c__Gammaproteobacteria	o__Pseudomonadales	f__Cellvibrionaceae	g__JAUVQU01	s__JAUVQU01 sp030597965
CompleteBin_CS10.722	372_2	d__Bacteria	p__Pseudomonadota	c__Gammaproteobacteria	o__Pseudomonadales	f__Cellvibrionaceae	g__JAUVQU01	s__JAUVQU01 sp030597965
CompleteBin_CS10.815	372_2	d__Bacteria	p__Pseudomonadota	c__Gammaproteobacteria	o__Pseudomonadales	f__Cellvibrionaceae	g__JAUVQU01	s__JAUVQU01 sp030597965
CompleteBin_CS10.841	372_2	d__Bacteria	p__Pseudomonadota	c__Gammaproteobacteria	o__Pseudomonadales	f__Cellvibrionaceae	g__JAUVQU01	s__JAUVQU01 sp030597965
MetaBAT2_CS10_bin.131	372_2	d__Bacteria	p__Pseudomonadota	c__Gammaproteobacteria	o__Pseudomonadales	f__Cellvibrionaceae	g__JAUVQU01	s__JAUVQU01 sp030597965
SemiBin2_CS10_SemiBin.5	372_2	d__Bacteria	p__Pseudomonadota	c__Gammaproteobacteria	o__Pseudomonadales	f__Cellvibrionaceae	g__JAUVQU01	s__JAUVQU01 sp030597965
VAMB_CS10_bin.24028	372_2	d__Bacteria	p__Pseudomonadota	c__Gammaproteobacteria	o__Pseudomonadales	f__Cellvibrionaceae	g__JAUVQU01	s__JAUVQU01 sp030597965
ComeBin_CS12_bin.63278	373_1	d__Bacteria	p__Pseudomonadota	c__Gammaproteobacteria	o__SZUA-152	f__SZUA-152	g__JAUVNZ01	s__
CompleteBin_CS12.576	373_1	d__Bacteria	p__Pseudomonadota	c__Gammaproteobacteria	o__SZUA-152	f__SZUA-152	g__JAUVNZ01	s__
CompleteBin_CS12.708	373_1	d__Bacteria	p__Pseudomonadota	c__Gammaproteobacteria	o__SZUA-152	f__SZUA-152	g__JAUVNZ01	s__
ComeBin_CS10_bin.28310	374_1	d__Bacteria	p__Pseudomonadota	c__Gammaproteobacteria	o__SZUA-152	f__SZUA-152	g__JAUVNZ01	s__
CompleteBin_CS10.58	374_1	d__Bacteria	p__Pseudomonadota	c__Gammaproteobacteria	o__SZUA-152	f__SZUA-152	g__JAUVNZ01	s__
MetaBAT2_CS10_bin.11	374_1	d__Bacteria	p__Pseudomonadota	c__Gammaproteobacteria	o__SZUA-152	f__SZUA-152	g__JAUVNZ01	s__
ComeBin_CS03_bin.109329	375_1	d__Bacteria	p__Pseudomonadota	c__Gammaproteobacteria	o__SZUA-152	f__SZUA-152	g__JAUVNZ01	s__
CompleteBin_CS03.307	375_1	d__Bacteria	p__Pseudomonadota	c__Gammaproteobacteria	o__SZUA-152	f__SZUA-152	g__JAUVNZ01	s__
CompleteBin_CS03.308	375_1	d__Bacteria	p__Pseudomonadota	c__Gammaproteobacteria	o__SZUA-152	f__SZUA-152	g__JAUVNZ01	s__
ComeBin_CS05_bin.11315	375_2	d__Bacteria	p__Pseudomonadota	c__Gammaproteobacteria	o__SZUA-152	f__SZUA-152	g__JAUVNZ01	s__
CompleteBin_CS05.176	375_2	d__Bacteria	p__Pseudomonadota	c__Gammaproteobacteria	o__SZUA-152	f__SZUA-152	g__JAUVNZ01	s__
CompleteBin_CS05.620	375_2	d__Bacteria	p__Pseudomonadota	c__Gammaproteobacteria	o__SZUA-152	f__SZUA-152	g__JAUVNZ01	s__
MetaBAT2_CS05_bin.41	375_2	d__Bacteria	p__Pseudomonadota	c__Gammaproteobacteria	o__SZUA-152	f__SZUA-152	g__JAUVNZ01	s__
SemiBin2_CS05_SemiBin.28	375_2	d__Bacteria	p__Pseudomonadota	c__Gammaproteobacteria	o__SZUA-152	f__SZUA-152	g__JAUVNZ01	s__
ComeBin_CS08_bin.21750	376_0	d__Bacteria	p__Pseudomonadota	c__Gammaproteobacteria	o__SZUA-152	f__SZUA-152	g__JAUVNZ01	s__
CompleteBin_CS05.243	377_1	d__Bacteria	p__Pseudomonadota	c__Gammaproteobacteria	o__SZUA-152	f__SZUA-152	g__JAUVNZ01	s__
CompleteBin_CS05.258	377_1	d__Bacteria	p__Pseudomonadota	c__Gammaproteobacteria	o__SZUA-152	f__SZUA-152	g__JAUVNZ01	s__
ComeBin_CS12_bin.11020	378_1	d__Bacteria	p__Pseudomonadota	c__Gammaproteobacteria	o__SZUA-152	f__SZUA-152	g__JAUVNZ01	s__JAUVNZ01 sp030599435
CompleteBin_CS12.570	378_1	d__Bacteria	p__Pseudomonadota	c__Gammaproteobacteria	o__SZUA-152	f__SZUA-152	g__JAUVNZ01	s__JAUVNZ01 sp030599435
CompleteBin_CS12.996	378_1	d__Bacteria	p__Pseudomonadota	c__Gammaproteobacteria	o__SZUA-152	f__SZUA-152	g__JAUVNZ01	s__JAUVNZ01 sp030599435
SemiBin2_CS12_SemiBin.61	378_1	d__Bacteria	p__Pseudomonadota	c__Gammaproteobacteria	o__SZUA-152	f__SZUA-152	g__JAUVNZ01	s__JAUVNZ01 sp030599435
CompleteBin_CS05.120	379_1	d__Bacteria	p__Pseudomonadota	c__Gammaproteobacteria	o__S012-40	f__S012-40	g__CALZJE01	s__
CompleteBin_CS05.397	379_1	d__Bacteria	p__Pseudomonadota	c__Gammaproteobacteria	o__S012-40	f__S012-40	g__CALZJE01	s__
CompleteBin_CS05.439	379_1	d__Bacteria	p__Pseudomonadota	c__Gammaproteobacteria	o__S012-40	f__S012-40	g__CALZJE01	s__
CompleteBin_CS05.79	379_1	d__Bacteria	p__Pseudomonadota	c__Gammaproteobacteria	o__S012-40	f__S012-40	g__CALZJE01	s__
CompleteBin_CS12.26	38_1	d__Archaea	p__Thermoproteota	c__Bathyarchaeia	o__TCS64	f__TCS64	g__RBG-16-57-9	s__
MetaBAT2_CS12_bin.141	38_1	d__Archaea	p__Thermoproteota	c__Bathyarchaeia	o__TCS64	f__TCS64	g__RBG-16-57-9	s__
SemiBin2_CS12_SemiBin.100	38_1	d__Archaea	p__Thermoproteota	c__Bathyarchaeia	o__TCS64	f__TCS64	g__RBG-16-57-9	s__
CONCOCT_CS03_bin.269	38_2	d__Archaea	p__Thermoproteota	c__Bathyarchaeia	o__TCS64	f__TCS64	g__RBG-16-57-9	s__
ComeBin_CS03_bin.21120	38_2	d__Archaea	p__Thermoproteota	c__Bathyarchaeia	o__TCS64	f__TCS64	g__RBG-16-57-9	s__
CompleteBin_CS03.500	38_2	d__Archaea	p__Thermoproteota	c__Bathyarchaeia	o__TCS64	f__TCS64	g__RBG-16-57-9	s__
CompleteBin_CS03.850	38_2	d__Archaea	p__Thermoproteota	c__Bathyarchaeia	o__TCS64	f__TCS64	g__RBG-16-57-9	s__
MetaBAT2_CS03_bin.103	38_2	d__Archaea	p__Thermoproteota	c__Bathyarchaeia	o__TCS64	f__TCS64	g__RBG-16-57-9	s__
SemiBin2_CS03_SemiBin.89	38_2	d__Archaea	p__Thermoproteota	c__Bathyarchaeia	o__TCS64	f__TCS64	g__RBG-16-57-9	s__
VAMB_CS03_bin.35939	38_2	d__Archaea	p__Thermoproteota	c__Bathyarchaeia	o__TCS64	f__TCS64	g__RBG-16-57-9	s__
ComeBin_CS08_bin.86772	380_1	d__Bacteria	p__Pseudomonadota	c__Gammaproteobacteria	o__UBA6429	f__UBA6429	g__JAGLTQ01	s__JAGLTQ01 sp030594815
CompleteBin_CS08.51	380_1	d__Bacteria	p__Pseudomonadota	c__Gammaproteobacteria	o__UBA6429	f__UBA6429	g__JAGLTQ01	s__JAGLTQ01 sp030594815
CompleteBin_CS08.52	380_1	d__Bacteria	p__Pseudomonadota	c__Gammaproteobacteria	o__UBA6429	f__UBA6429	g__JAGLTQ01	s__JAGLTQ01 sp030594815
CONCOCT_CS10_bin.187	381_1	d__Bacteria	p__Pseudomonadota	c__Gammaproteobacteria	o__UBA6429	f__UBA6429	g__JAGLTQ01	s__
ComeBin_CS10_bin.65327	381_1	d__Bacteria	p__Pseudomonadota	c__Gammaproteobacteria	o__UBA6429	f__UBA6429	g__JAGLTQ01	s__
CompleteBin_CS10.654	381_1	d__Bacteria	p__Pseudomonadota	c__Gammaproteobacteria	o__UBA6429	f__UBA6429	g__JAGLTQ01	s__
CompleteBin_CS10.655	381_1	d__Bacteria	p__Pseudomonadota	c__Gammaproteobacteria	o__UBA6429	f__UBA6429	g__JAGLTQ01	s__
CompleteBin_CS05.190	382_0	d__Bacteria	p__Pseudomonadota	c__Gammaproteobacteria	o__UBA6429	f__UBA6429	g__JAGLTQ01	s__
ComeBin_CS10_bin.90468	383_1	d__Bacteria	p__Pseudomonadota	c__Gammaproteobacteria	o__UBA6429	f__UBA6429	g__JAGLTQ01	s__
CompleteBin_CS10.697	383_1	d__Bacteria	p__Pseudomonadota	c__Gammaproteobacteria	o__UBA6429	f__UBA6429	g__JAGLTQ01	s__
ComeBin_CS05_bin.85577	383_2	d__Bacteria	p__Pseudomonadota	c__Gammaproteobacteria	o__UBA6429	f__UBA6429	g__JAGLTQ01	s__
CompleteBin_CS05.250	383_2	d__Bacteria	p__Pseudomonadota	c__Gammaproteobacteria	o__UBA6429	f__UBA6429	g__JAGLTQ01	s__
CompleteBin_CS05.251	383_2	d__Bacteria	p__Pseudomonadota	c__Gammaproteobacteria	o__UBA6429	f__UBA6429	g__JAGLTQ01	s__
ComeBin_CS08_bin.105895	383_3	d__Bacteria	p__Pseudomonadota	c__Gammaproteobacteria	o__UBA6429	f__UBA6429	g__JAGLTQ01	s__
CompleteBin_CS08.194	383_3	d__Bacteria	p__Pseudomonadota	c__Gammaproteobacteria	o__UBA6429	f__UBA6429	g__JAGLTQ01	s__
MetaBAT2_CS08_bin.30	383_3	d__Bacteria	p__Pseudomonadota	c__Gammaproteobacteria	o__UBA6429	f__UBA6429	g__JAGLTQ01	s__
ComeBin_CS12_bin.191424	384_1	d__Bacteria	p__Pseudomonadota	c__Gammaproteobacteria	o__UBA6429	f__UBA6429	g__JAGLTQ01	s__JAGLTQ01 sp030617815
CompleteBin_CS12.507	384_1	d__Bacteria	p__Pseudomonadota	c__Gammaproteobacteria	o__UBA6429	f__UBA6429	g__JAGLTQ01	s__JAGLTQ01 sp030617815
ComeBin_CS08_bin.26636	384_2	d__Bacteria	p__Pseudomonadota	c__Gammaproteobacteria	o__UBA6429	f__UBA6429	g__JAGLTQ01	s__
CompleteBin_CS08.24	384_2	d__Bacteria	p__Pseudomonadota	c__Gammaproteobacteria	o__UBA6429	f__UBA6429	g__JAGLTQ01	s__
CompleteBin_CS08.659	384_2	d__Bacteria	p__Pseudomonadota	c__Gammaproteobacteria	o__UBA6429	f__UBA6429	g__JAGLTQ01	s__
ComeBin_CS05_bin.6467	384_3	d__Bacteria	p__Pseudomonadota	c__Gammaproteobacteria	o__UBA6429	f__UBA6429	g__JAGLTQ01	s__JAGLTQ01 sp030617815
CompleteBin_CS05.407	384_3	d__Bacteria	p__Pseudomonadota	c__Gammaproteobacteria	o__UBA6429	f__UBA6429	g__JAGLTQ01	s__JAGLTQ01 sp030617815
MetaBAT2_CS05_bin.80	384_3	d__Bacteria	p__Pseudomonadota	c__Gammaproteobacteria	o__UBA6429	f__UBA6429	g__JAGLTQ01	s__JAGLTQ01 sp030617815
SemiBin2_CS05_SemiBin.19	384_3	d__Bacteria	p__Pseudomonadota	c__Gammaproteobacteria	o__UBA6429	f__UBA6429	g__JAGLTQ01	s__JAGLTQ01 sp030617815
ComeBin_CS10_bin.88104	384_4	d__Bacteria	p__Pseudomonadota	c__Gammaproteobacteria	o__UBA6429	f__UBA6429	g__JAGLTQ01	s__JAGLTQ01 sp030617815
CompleteBin_CS10.652	384_4	d__Bacteria	p__Pseudomonadota	c__Gammaproteobacteria	o__UBA6429	f__UBA6429	g__JAGLTQ01	s__JAGLTQ01 sp030617815
VAMB_CS10_bin.11506	384_4	d__Bacteria	p__Pseudomonadota	c__Gammaproteobacteria	o__UBA6429	f__UBA6429	g__JAGLTQ01	s__JAGLTQ01 sp030617815
ComeBin_CS05_bin.13937	385_1	d__Bacteria	p__Pseudomonadota	c__Gammaproteobacteria	o__SZUA-229	f__SZUA-229	g__JABDQW01	s__
CompleteBin_CS05.249	385_1	d__Bacteria	p__Pseudomonadota	c__Gammaproteobacteria	o__SZUA-229	f__SZUA-229	g__JABDQW01	s__
CompleteBin_CS05.769	385_1	d__Bacteria	p__Pseudomonadota	c__Gammaproteobacteria	o__SZUA-229	f__SZUA-229	g__JABDQW01	s__
SemiBin2_CS05_SemiBin.34	385_1	d__Bacteria	p__Pseudomonadota	c__Gammaproteobacteria	o__SZUA-229	f__SZUA-229	g__JABDQW01	s__
ComeBin_CS12_bin.112781	386_1	d__Bacteria	p__Pseudomonadota	c__Gammaproteobacteria	o__SZUA-229	f__SZUA-229	g__SZUA-116	s__
CompleteBin_CS12.263	386_1	d__Bacteria	p__Pseudomonadota	c__Gammaproteobacteria	o__SZUA-229	f__SZUA-229	g__SZUA-116	s__
ComeBin_CS05_bin.40650	387_1	d__Bacteria	p__Pseudomonadota	c__Gammaproteobacteria	o__AKS1	f__AKS1	g__Sulfuriflexus	s__
CompleteBin_CS05.137	387_1	d__Bacteria	p__Pseudomonadota	c__Gammaproteobacteria	o__AKS1	f__AKS1	g__Sulfuriflexus	s__
CompleteBin_CS05.140	387_1	d__Bacteria	p__Pseudomonadota	c__Gammaproteobacteria	o__AKS1	f__AKS1	g__Sulfuriflexus	s__
MetaBAT2_CS05_bin.31	387_1	d__Bacteria	p__Pseudomonadota	c__Gammaproteobacteria	o__AKS1	f__AKS1	g__Sulfuriflexus	s__
SemiBin2_CS05_SemiBin.82	387_1	d__Bacteria	p__Pseudomonadota	c__Gammaproteobacteria	o__AKS1	f__AKS1	g__Sulfuriflexus	s__
ComeBin_CS05_bin.107433	388_1	d__Bacteria	p__Pseudomonadota	c__Gammaproteobacteria	o__UBA4486	f__UBA4486	g__SMWN01	s__
CompleteBin_CS05.297	388_1	d__Bacteria	p__Pseudomonadota	c__Gammaproteobacteria	o__UBA4486	f__UBA4486	g__SMWN01	s__
ComeBin_CS05_bin.4687	389_1	d__Bacteria	p__Pseudomonadota	c__Gammaproteobacteria	o__JAJDYQ01	f__JAJDYQ01	g__JAJDYQ01	s__
CompleteBin_CS05.178	389_1	d__Bacteria	p__Pseudomonadota	c__Gammaproteobacteria	o__JAJDYQ01	f__JAJDYQ01	g__JAJDYQ01	s__
CompleteBin_CS05.353	389_1	d__Bacteria	p__Pseudomonadota	c__Gammaproteobacteria	o__JAJDYQ01	f__JAJDYQ01	g__JAJDYQ01	s__
MetaBAT2_CS05_bin.21	389_1	d__Bacteria	p__Pseudomonadota	c__Gammaproteobacteria	o__JAJDYQ01	f__JAJDYQ01	g__JAJDYQ01	s__
SemiBin2_CS05_SemiBin.16	389_1	d__Bacteria	p__Pseudomonadota	c__Gammaproteobacteria	o__JAJDYQ01	f__JAJDYQ01	g__JAJDYQ01	s__
VAMB_CS05_bin.16841	389_1	d__Bacteria	p__Pseudomonadota	c__Gammaproteobacteria	o__JAJDYQ01	f__JAJDYQ01	g__JAJDYQ01	s__
ComeBin_CS12_bin.62515	39_1	d__Archaea	p__Thermoproteota	c__Bathyarchaeia	o__TCS64	f__TCS64	g__RBG-16-57-9	s__
CompleteBin_CS12.2376	39_1	d__Archaea	p__Thermoproteota	c__Bathyarchaeia	o__TCS64	f__TCS64	g__RBG-16-57-9	s__
CompleteBin_CS12.28	39_1	d__Archaea	p__Thermoproteota	c__Bathyarchaeia	o__TCS64	f__TCS64	g__RBG-16-57-9	s__
MetaBAT2_CS12_bin.21	39_1	d__Archaea	p__Thermoproteota	c__Bathyarchaeia	o__TCS64	f__TCS64	g__RBG-16-57-9	s__
VAMB_CS12_bin.18160	39_1	d__Archaea	p__Thermoproteota	c__Bathyarchaeia	o__TCS64	f__TCS64	g__RBG-16-57-9	s__
ComeBin_CS08_bin.70066	390_1	d__Bacteria	p__Pseudomonadota	c__Gammaproteobacteria	o__SZUA-229	f__SZUA-229	g__SZUA-116	s__
CompleteBin_CS08.86	390_1	d__Bacteria	p__Pseudomonadota	c__Gammaproteobacteria	o__SZUA-229	f__SZUA-229	g__SZUA-116	s__
CompleteBin_CS08.87	390_1	d__Bacteria	p__Pseudomonadota	c__Gammaproteobacteria	o__SZUA-229	f__SZUA-229	g__SZUA-116	s__
CompleteBin_CS08.88	390_1	d__Bacteria	p__Pseudomonadota	c__Gammaproteobacteria	o__SZUA-229	f__SZUA-229	g__SZUA-116	s__
MetaBAT2_CS08_bin.151	390_1	d__Bacteria	p__Pseudomonadota	c__Gammaproteobacteria	o__SZUA-229	f__SZUA-229	g__SZUA-116	s__
SemiBin2_CS08_SemiBin.112	390_1	d__Bacteria	p__Pseudomonadota	c__Gammaproteobacteria	o__SZUA-229	f__SZUA-229	g__SZUA-116	s__
ComeBin_CS05_bin.110739	390_2	d__Bacteria	p__Pseudomonadota	c__Gammaproteobacteria	o__SZUA-229	f__SZUA-229	g__SZUA-116	s__
CompleteBin_CS05.301	390_2	d__Bacteria	p__Pseudomonadota	c__Gammaproteobacteria	o__SZUA-229	f__SZUA-229	g__SZUA-116	s__
ComeBin_CS10_bin.126897	390_3	d__Bacteria	p__Pseudomonadota	c__Gammaproteobacteria	o__SZUA-229	f__SZUA-229	g__SZUA-116	s__
CompleteBin_CS10.79	390_3	d__Bacteria	p__Pseudomonadota	c__Gammaproteobacteria	o__SZUA-229	f__SZUA-229	g__SZUA-116	s__
CompleteBin_CS10.90	391_0	d__Bacteria	p__Pseudomonadota	c__Gammaproteobacteria	o__SZUA-229	f__SZUA-229	g__SZUA-116	s__
ComeBin_CS10_bin.190159	392_1	d__Bacteria	p__Pseudomonadota	c__Gammaproteobacteria	o__SZUA-229	f__SZUA-229	g__GCA-2746365	s__
CompleteBin_CS10.844	392_1	d__Bacteria	p__Pseudomonadota	c__Gammaproteobacteria	o__SZUA-229	f__SZUA-229	g__GCA-2746365	s__
ComeBin_CS08_bin.68390	393_1	d__Bacteria	p__Pseudomonadota	c__Gammaproteobacteria	o__SZUA-229	f__SZUA-229	g__GCA-2746365	s__GCA-2746365 sp013138755
CompleteBin_CS08.119	393_1	d__Bacteria	p__Pseudomonadota	c__Gammaproteobacteria	o__SZUA-229	f__SZUA-229	g__GCA-2746365	s__GCA-2746365 sp013138755
MetaBAT2_CS08_bin.25	393_1	d__Bacteria	p__Pseudomonadota	c__Gammaproteobacteria	o__SZUA-229	f__SZUA-229	g__GCA-2746365	s__GCA-2746365 sp013138755
VAMB_CS08_bin.38863	393_1	d__Bacteria	p__Pseudomonadota	c__Gammaproteobacteria	o__SZUA-229	f__SZUA-229	g__GCA-2746365	s__GCA-2746365 sp013138755
ComeBin_CS05_bin.3961	393_2	d__Bacteria	p__Pseudomonadota	c__Gammaproteobacteria	o__SZUA-229	f__SZUA-229	g__GCA-2746365	s__GCA-2746365 sp013138755
CompleteBin_CS05.233	393_2	d__Bacteria	p__Pseudomonadota	c__Gammaproteobacteria	o__SZUA-229	f__SZUA-229	g__GCA-2746365	s__GCA-2746365 sp013138755
MetaBAT2_CS05_bin.85	393_2	d__Bacteria	p__Pseudomonadota	c__Gammaproteobacteria	o__SZUA-229	f__SZUA-229	g__GCA-2746365	s__GCA-2746365 sp013138755
SemiBin2_CS05_SemiBin.14	393_2	d__Bacteria	p__Pseudomonadota	c__Gammaproteobacteria	o__SZUA-229	f__SZUA-229	g__GCA-2746365	s__GCA-2746365 sp013138755
VAMB_CS05_bin.27421	393_2	d__Bacteria	p__Pseudomonadota	c__Gammaproteobacteria	o__SZUA-229	f__SZUA-229	g__GCA-2746365	s__GCA-2746365 sp013138755
ComeBin_CS05_bin.65628	394_1	d__Bacteria	p__Pseudomonadota	c__Gammaproteobacteria	o__SZUA-229	f__SZUA-229	g__GCA-2746365	s__
CompleteBin_CS05.198	394_1	d__Bacteria	p__Pseudomonadota	c__Gammaproteobacteria	o__SZUA-229	f__SZUA-229	g__GCA-2746365	s__
VAMB_CS05_bin.17586	394_1	d__Bacteria	p__Pseudomonadota	c__Gammaproteobacteria	o__SZUA-229	f__SZUA-229	g__GCA-2746365	s__
CONCOCT_CS08_bin.218	394_2	d__Bacteria	p__Pseudomonadota	c__Gammaproteobacteria	o__SZUA-229	f__SZUA-229	g__GCA-2746365	s__
ComeBin_CS08_bin.42343	394_2	d__Bacteria	p__Pseudomonadota	c__Gammaproteobacteria	o__SZUA-229	f__SZUA-229	g__GCA-2746365	s__
CompleteBin_CS08.56	394_2	d__Bacteria	p__Pseudomonadota	c__Gammaproteobacteria	o__SZUA-229	f__SZUA-229	g__GCA-2746365	s__
ComeBin_CS12_bin.107927	394_3	d__Bacteria	p__Pseudomonadota	c__Gammaproteobacteria	o__SZUA-229	f__SZUA-229	g__GCA-2746365	s__
CompleteBin_CS12.173	394_3	d__Bacteria	p__Pseudomonadota	c__Gammaproteobacteria	o__SZUA-229	f__SZUA-229	g__GCA-2746365	s__
MetaBAT2_CS12_bin.163	394_3	d__Bacteria	p__Pseudomonadota	c__Gammaproteobacteria	o__SZUA-229	f__SZUA-229	g__GCA-2746365	s__
SemiBin2_CS12_SemiBin.323	394_3	d__Bacteria	p__Pseudomonadota	c__Gammaproteobacteria	o__SZUA-229	f__SZUA-229	g__GCA-2746365	s__
VAMB_CS12_bin.18039	394_3	d__Bacteria	p__Pseudomonadota	c__Gammaproteobacteria	o__SZUA-229	f__SZUA-229	g__GCA-2746365	s__
ComeBin_CS10_bin.104102	394_4	d__Bacteria	p__Pseudomonadota	c__Gammaproteobacteria	o__SZUA-229	f__SZUA-229	g__GCA-2746365	s__
ComeBin_CS08_bin.54108	395_1	d__Bacteria	p__Pseudomonadota	c__Gammaproteobacteria	o__SZUA-229	f__SZUA-229	g__GCA-2746365	s__
CompleteBin_CS08.89	395_1	d__Bacteria	p__Pseudomonadota	c__Gammaproteobacteria	o__SZUA-229	f__SZUA-229	g__GCA-2746365	s__
MetaBAT2_CS08_bin.57	395_1	d__Bacteria	p__Pseudomonadota	c__Gammaproteobacteria	o__SZUA-229	f__SZUA-229	g__GCA-2746365	s__
SemiBin2_CS08_SemiBin.114	395_1	d__Bacteria	p__Pseudomonadota	c__Gammaproteobacteria	o__SZUA-229	f__SZUA-229	g__GCA-2746365	s__
CompleteBin_CS08.61	396_0	d__Bacteria	p__Pseudomonadota	c__Gammaproteobacteria	o__BMS3Bbin11	f__BMS3Bbin11	g__BMS3Bbin11	s__
ComeBin_CS08_bin.17231	397_1	d__Bacteria	p__Pseudomonadota	c__Gammaproteobacteria	o__SZUA-229	f__SZUA-229	g__GCA-2746365	s__
CompleteBin_CS08.512	397_1	d__Bacteria	p__Pseudomonadota	c__Gammaproteobacteria	o__SZUA-229	f__SZUA-229	g__GCA-2746365	s__
CompleteBin_CS08.521	397_2	d__Bacteria	p__Pseudomonadota	c__Gammaproteobacteria	o__SZUA-229	f__SZUA-229	g__GCA-2746365	s__
ComeBin_CS01_bin.84720	398_1	d__Bacteria	p__Pseudomonadota	c__Gammaproteobacteria	o__SZUA-229	f__SZUA-229	g__GCA-2746365	s__
CompleteBin_CS01.29	398_1	d__Bacteria	p__Pseudomonadota	c__Gammaproteobacteria	o__SZUA-229	f__SZUA-229	g__GCA-2746365	s__
CompleteBin_CS05.385	399_1	d__Bacteria	p__Pseudomonadota	c__Gammaproteobacteria	o__SZUA-229	f__SZUA-229	g__GCA-2746365	s__
CompleteBin_CS12.302	399_2	d__Bacteria	p__Pseudomonadota	c__Gammaproteobacteria	o__SZUA-229	f__SZUA-229	g__GCA-2746365	s__
CONCOCT_CS01_bin.114	4_1	d__Bacteria	p__Patescibacteria	c__ABY1	o__SG8-24	f__SG8-24	g__JAFGIV01	s__
ComeBin_CS01_bin.169114	4_1	d__Bacteria	p__Patescibacteria	c__ABY1	o__SG8-24	f__SG8-24	g__JAFGIV01	s__
CompleteBin_CS01.533	4_1	d__Bacteria	p__Patescibacteria	c__ABY1	o__SG8-24	f__SG8-24	g__JAFGIV01	s__
CompleteBin_CS01.15	40_0	d__Bacteria	p__Actinomycetota	c__Coriobacteriia	o__Anaerosomatales	f__JAGXFU01	g__JAGXFU01	s__
CompleteBin_CS10.1007	400_0	d__Bacteria	p__Pseudomonadota	c__Gammaproteobacteria	o__SZUA-229	f__SZUA-229	g__GCA-2746365	s__
ComeBin_CS01_bin.156959	401_1	d__Bacteria	p__Pseudomonadota	c__Gammaproteobacteria	o__SZUA-229	f__SZUA-229	g__GCA-2746365	s__
CompleteBin_CS01.607	401_1	d__Bacteria	p__Pseudomonadota	c__Gammaproteobacteria	o__SZUA-229	f__SZUA-229	g__GCA-2746365	s__
VAMB_CS01_bin.15049	401_1	d__Bacteria	p__Pseudomonadota	c__Gammaproteobacteria	o__SZUA-229	f__SZUA-229	g__GCA-2746365	s__
CompleteBin_CS12.174	401_2	d__Bacteria	p__Pseudomonadota	c__Gammaproteobacteria	o__SZUA-229	f__SZUA-229	g__GCA-2746365	s__
CompleteBin_CS12.221	401_2	d__Bacteria	p__Pseudomonadota	c__Gammaproteobacteria	o__SZUA-229	f__SZUA-229	g__GCA-2746365	s__
ComeBin_CS03_bin.148958	402_1	d__Bacteria	p__Pseudomonadota	c__Gammaproteobacteria	o__SZUA-229	f__SZUA-229	g__GCA-2746365	s__
CompleteBin_CS03.353	402_1	d__Bacteria	p__Pseudomonadota	c__Gammaproteobacteria	o__SZUA-229	f__SZUA-229	g__GCA-2746365	s__
CompleteBin_CS03.354	402_1	d__Bacteria	p__Pseudomonadota	c__Gammaproteobacteria	o__SZUA-229	f__SZUA-229	g__GCA-2746365	s__
ComeBin_CS05_bin.175093	402_2	d__Bacteria	p__Pseudomonadota	c__Gammaproteobacteria	o__SZUA-229	f__SZUA-229	g__GCA-2746365	s__
CompleteBin_CS05.434	402_2	d__Bacteria	p__Pseudomonadota	c__Gammaproteobacteria	o__SZUA-229	f__SZUA-229	g__GCA-2746365	s__
CompleteBin_CS05.435	402_2	d__Bacteria	p__Pseudomonadota	c__Gammaproteobacteria	o__SZUA-229	f__SZUA-229	g__GCA-2746365	s__
CompleteBin_CS05.436	402_2	d__Bacteria	p__Pseudomonadota	c__Gammaproteobacteria	o__SZUA-229	f__SZUA-229	g__GCA-2746365	s__
ComeBin_CS08_bin.713	403_1	d__Bacteria	p__Pseudomonadota	c__Gammaproteobacteria	o__SZUA-229	f__SZUA-229	g__GCA-2746365	s__
CompleteBin_CS08.6	403_1	d__Bacteria	p__Pseudomonadota	c__Gammaproteobacteria	o__SZUA-229	f__SZUA-229	g__GCA-2746365	s__
MetaBAT2_CS08_bin.69	403_1	d__Bacteria	p__Pseudomonadota	c__Gammaproteobacteria	o__SZUA-229	f__SZUA-229	g__GCA-2746365	s__
SemiBin2_CS08_SemiBin.4	403_1	d__Bacteria	p__Pseudomonadota	c__Gammaproteobacteria	o__SZUA-229	f__SZUA-229	g__GCA-2746365	s__
VAMB_CS08_bin.22713	403_1	d__Bacteria	p__Pseudomonadota	c__Gammaproteobacteria	o__SZUA-229	f__SZUA-229	g__GCA-2746365	s__
CompleteBin_CS10.12	404_0	d__Bacteria	p__Pseudomonadota	c__Gammaproteobacteria	o__SZUA-229	f__SZUA-229	g__GCA-2746365	s__
ComeBin_CS08_bin.34347	405_1	d__Bacteria	p__Pseudomonadota	c__Gammaproteobacteria	o__SZUA-229	f__SZUA-229	g__GCA-2746365	s__
CompleteBin_CS08.36	405_1	d__Bacteria	p__Pseudomonadota	c__Gammaproteobacteria	o__SZUA-229	f__SZUA-229	g__GCA-2746365	s__
MetaBAT2_CS08_bin.111	405_1	d__Bacteria	p__Pseudomonadota	c__Gammaproteobacteria	o__SZUA-229	f__SZUA-229	g__GCA-2746365	s__
SemiBin2_CS08_SemiBin.77	405_1	d__Bacteria	p__Pseudomonadota	c__Gammaproteobacteria	o__SZUA-229	f__SZUA-229	g__GCA-2746365	s__
VAMB_CS08_bin.17420	405_1	d__Bacteria	p__Pseudomonadota	c__Gammaproteobacteria	o__SZUA-229	f__SZUA-229	g__GCA-2746365	s__
ComeBin_CS05_bin.72057	405_2	d__Bacteria	p__Pseudomonadota	c__Gammaproteobacteria	o__SZUA-229	f__SZUA-229	g__GCA-2746365	s__
CompleteBin_CS05.244	405_2	d__Bacteria	p__Pseudomonadota	c__Gammaproteobacteria	o__SZUA-229	f__SZUA-229	g__GCA-2746365	s__
CompleteBin_CS05.266	405_2	d__Bacteria	p__Pseudomonadota	c__Gammaproteobacteria	o__SZUA-229	f__SZUA-229	g__GCA-2746365	s__
CompleteBin_CS05.305	405_2	d__Bacteria	p__Pseudomonadota	c__Gammaproteobacteria	o__SZUA-229	f__SZUA-229	g__GCA-2746365	s__
MetaBAT2_CS05_bin.72	405_2	d__Bacteria	p__Pseudomonadota	c__Gammaproteobacteria	o__SZUA-229	f__SZUA-229	g__GCA-2746365	s__
VAMB_CS05_bin.17414	405_2	d__Bacteria	p__Pseudomonadota	c__Gammaproteobacteria	o__SZUA-229	f__SZUA-229	g__GCA-2746365	s__
ComeBin_CS05_bin.7271	406_1	d__Bacteria	p__Pseudomonadota	c__Gammaproteobacteria	o__SZUA-229	f__SZUA-229	g__GCA-2746365	s__
CompleteBin_CS05.685	406_1	d__Bacteria	p__Pseudomonadota	c__Gammaproteobacteria	o__SZUA-229	f__SZUA-229	g__GCA-2746365	s__
MetaBAT2_CS05_bin.115	406_1	d__Bacteria	p__Pseudomonadota	c__Gammaproteobacteria	o__SZUA-229	f__SZUA-229	g__GCA-2746365	s__
SemiBin2_CS05_SemiBin.31	406_1	d__Bacteria	p__Pseudomonadota	c__Gammaproteobacteria	o__SZUA-229	f__SZUA-229	g__GCA-2746365	s__
VAMB_CS05_bin.23420	406_1	d__Bacteria	p__Pseudomonadota	c__Gammaproteobacteria	o__SZUA-229	f__SZUA-229	g__GCA-2746365	s__
CompleteBin_CS05.716	407_1	d__Bacteria	p__Pseudomonadota	c__Gammaproteobacteria	o__SZUA-229	f__SZUA-229	g__GCA-2746365	s__
MetaBAT2_CS05_bin.9	407_1	d__Bacteria	p__Pseudomonadota	c__Gammaproteobacteria	o__SZUA-229	f__SZUA-229	g__GCA-2746365	s__
CompleteBin_CS05.707	407_2	d__Bacteria	p__Pseudomonadota	c__Gammaproteobacteria	o__SZUA-229	f__SZUA-229	g__GCA-2746365	s__
CompleteBin_CS10.967	408_0	d__Bacteria	p__Pseudomonadota	c__Gammaproteobacteria	o__SZUA-229	f__SZUA-229	g__GCA-2746365	s__
ComeBin_CS08_bin.126626	409_1	d__Bacteria	p__Pseudomonadota	c__Gammaproteobacteria	o__SZUA-229	f__SZUA-229	g__GCA-2746365	s__
CompleteBin_CS08.78	409_1	d__Bacteria	p__Pseudomonadota	c__Gammaproteobacteria	o__SZUA-229	f__SZUA-229	g__GCA-2746365	s__
ComeBin_CS10_bin.57636	409_2	d__Bacteria	p__Pseudomonadota	c__Gammaproteobacteria	o__SZUA-229	f__SZUA-229	g__GCA-2746365	s__
CompleteBin_CS10.1422	409_2	d__Bacteria	p__Pseudomonadota	c__Gammaproteobacteria	o__SZUA-229	f__SZUA-229	g__GCA-2746365	s__
CompleteBin_CS10.36	409_2	d__Bacteria	p__Pseudomonadota	c__Gammaproteobacteria	o__SZUA-229	f__SZUA-229	g__GCA-2746365	s__
CompleteBin_CS12.54	409_3	d__Bacteria	p__Pseudomonadota	c__Gammaproteobacteria	o__SZUA-229	f__SZUA-229	g__GCA-2746365	s__
CONCOCT_CS03_bin.93	41_1	d__Archaea	p__Asgardarchaeota	c__Thorarchaeia	o__Thorarchaeales	f__Thorarchaeaceae	g__WTCK01	s__WTCK01 sp013138615
CompleteBin_CS03.310	41_1	d__Archaea	p__Asgardarchaeota	c__Thorarchaeia	o__Thorarchaeales	f__Thorarchaeaceae	g__WTCK01	s__WTCK01 sp013138615
CONCOCT_CS08_bin.247	41_2	d__Archaea	p__Asgardarchaeota	c__Thorarchaeia	o__Thorarchaeales	f__Thorarchaeaceae	g__WTCK01	s__
ComeBin_CS08_bin.67685	41_2	d__Archaea	p__Asgardarchaeota	c__Thorarchaeia	o__Thorarchaeales	f__Thorarchaeaceae	g__WTCK01	s__
CompleteBin_CS08.11	41_2	d__Archaea	p__Asgardarchaeota	c__Thorarchaeia	o__Thorarchaeales	f__Thorarchaeaceae	g__WTCK01	s__
MetaBAT2_CS08_bin.58	41_2	d__Archaea	p__Asgardarchaeota	c__Thorarchaeia	o__Thorarchaeales	f__Thorarchaeaceae	g__WTCK01	s__
VAMB_CS08_bin.18160	41_2	d__Archaea	p__Asgardarchaeota	c__Thorarchaeia	o__Thorarchaeales	f__Thorarchaeaceae	g__WTCK01	s__
CONCOCT_CS05_bin.65	41_3	d__Archaea	p__Asgardarchaeota	c__Thorarchaeia	o__Thorarchaeales	f__Thorarchaeaceae	g__WTCK01	s__
ComeBin_CS05_bin.151879	41_3	d__Archaea	p__Asgardarchaeota	c__Thorarchaeia	o__Thorarchaeales	f__Thorarchaeaceae	g__WTCK01	s__
CompleteBin_CS05.398	41_3	d__Archaea	p__Asgardarchaeota	c__Thorarchaeia	o__Thorarchaeales	f__Thorarchaeaceae	g__WTCK01	s__
CompleteBin_CS05.58	41_3	d__Archaea	p__Asgardarchaeota	c__Thorarchaeia	o__Thorarchaeales	f__Thorarchaeaceae	g__WTCK01	s__
VAMB_CS05_bin.17530	41_3	d__Archaea	p__Asgardarchaeota	c__Thorarchaeia	o__Thorarchaeales	f__Thorarchaeaceae	g__WTCK01	s__
CONCOCT_CS12_bin.213	41_4	d__Archaea	p__Asgardarchaeota	c__Thorarchaeia	o__Thorarchaeales	f__Thorarchaeaceae	g__WTCK01	s__
ComeBin_CS12_bin.118348	41_4	d__Archaea	p__Asgardarchaeota	c__Thorarchaeia	o__Thorarchaeales	f__Thorarchaeaceae	g__WTCK01	s__
CompleteBin_CS12.281	41_4	d__Archaea	p__Asgardarchaeota	c__Thorarchaeia	o__Thorarchaeales	f__Thorarchaeaceae	g__WTCK01	s__
VAMB_CS12_bin.15491	41_4	d__Archaea	p__Asgardarchaeota	c__Thorarchaeia	o__Thorarchaeales	f__Thorarchaeaceae	g__WTCK01	s__
ComeBin_CS10_bin.27606	410_1	d__Bacteria	p__Pseudomonadota	c__Gammaproteobacteria	o__SZUA-229	f__SZUA-229	g__GCA-2746365	s__
CompleteBin_CS10.14	410_1	d__Bacteria	p__Pseudomonadota	c__Gammaproteobacteria	o__SZUA-229	f__SZUA-229	g__GCA-2746365	s__
CompleteBin_CS10.1401	410_1	d__Bacteria	p__Pseudomonadota	c__Gammaproteobacteria	o__SZUA-229	f__SZUA-229	g__GCA-2746365	s__
SemiBin2_CS10_SemiBin.72	410_1	d__Bacteria	p__Pseudomonadota	c__Gammaproteobacteria	o__SZUA-229	f__SZUA-229	g__GCA-2746365	s__
ComeBin_CS08_bin.48744	410_2	d__Bacteria	p__Pseudomonadota	c__Gammaproteobacteria	o__SZUA-229	f__SZUA-229	g__GCA-2746365	s__
ComeBin_CS12_bin.30620	410_3	d__Bacteria	p__Pseudomonadota	c__Gammaproteobacteria	o__SZUA-229	f__SZUA-229	g__GCA-2746365	s__
ComeBin_CS10_bin.45258	411_1	d__Bacteria	p__Pseudomonadota	c__Gammaproteobacteria	o__SZUA-229	f__SZUA-229	g__GCA-2746365	s__
CompleteBin_CS10.1433	411_1	d__Bacteria	p__Pseudomonadota	c__Gammaproteobacteria	o__SZUA-229	f__SZUA-229	g__GCA-2746365	s__
SemiBin2_CS10_SemiBin.40	411_1	d__Bacteria	p__Pseudomonadota	c__Gammaproteobacteria	o__SZUA-229	f__SZUA-229	g__GCA-2746365	s__
ComeBin_CS08_bin.114890	411_2	d__Bacteria	p__Pseudomonadota	c__Gammaproteobacteria	o__SZUA-229	f__SZUA-229	g__GCA-2746365	s__
ComeBin_CS12_bin.128223	411_3	d__Bacteria	p__Pseudomonadota	c__Gammaproteobacteria	o__SZUA-229	f__SZUA-229	g__GCA-2746365	s__
CompleteBin_CS10.1444	412_0	d__Bacteria	p__Pseudomonadota	c__Gammaproteobacteria	o__SZUA-229	f__SZUA-229	g__GCA-2746365	s__
CONCOCT_CS12_bin.162	413_1	d__Bacteria	p__Zixibacteria	c__MSB-5A5	o__MSB-5A5	f__SM1-73	g__SM23-73-3	s__
ComeBin_CS12_bin.11795	413_1	d__Bacteria	p__Zixibacteria	c__MSB-5A5	o__MSB-5A5	f__SM1-73	g__SM23-73-3	s__
CompleteBin_CS12.611	413_1	d__Bacteria	p__Zixibacteria	c__MSB-5A5	o__MSB-5A5	f__SM1-73	g__SM23-73-3	s__
MetaBAT2_CS12_bin.167	413_1	d__Bacteria	p__Zixibacteria	c__MSB-5A5	o__MSB-5A5	f__SM1-73	g__SM23-73-3	s__
SemiBin2_CS12_SemiBin.63	413_1	d__Bacteria	p__Zixibacteria	c__MSB-5A5	o__MSB-5A5	f__SM1-73	g__SM23-73-3	s__
CONCOCT_CS01_bin.214	414_1	d__Bacteria	p__Marinisomatota	c__AB16	o__AB16	f__46-47	g__M50B103	s__M50B103 sp030596185
ComeBin_CS01_bin.229610	414_1	d__Bacteria	p__Marinisomatota	c__AB16	o__AB16	f__46-47	g__M50B103	s__M50B103 sp030596185
CompleteBin_CS01.801	414_1	d__Bacteria	p__Marinisomatota	c__AB16	o__AB16	f__46-47	g__M50B103	s__M50B103 sp030596185
CONCOCT_CS05_bin.202	415_1	d__Bacteria	p__Pseudomonadota	c__Gammaproteobacteria	o__PS1	f__Thioglobaceae	g__Ruthia	s__Ruthia sp030599095
ComeBin_CS05_bin.15309	415_1	d__Bacteria	p__Pseudomonadota	c__Gammaproteobacteria	o__PS1	f__Thioglobaceae	g__Ruthia	s__Ruthia sp030599095
CompleteBin_CS05.16	415_1	d__Bacteria	p__Pseudomonadota	c__Gammaproteobacteria	o__PS1	f__Thioglobaceae	g__Ruthia	s__Ruthia sp030599095
MetaBAT2_CS05_bin.12	415_1	d__Bacteria	p__Pseudomonadota	c__Gammaproteobacteria	o__PS1	f__Thioglobaceae	g__Ruthia	s__Ruthia sp030599095
SemiBin2_CS05_SemiBin.39	415_1	d__Bacteria	p__Pseudomonadota	c__Gammaproteobacteria	o__PS1	f__Thioglobaceae	g__Ruthia	s__Ruthia sp030599095
VAMB_CS05_bin.132690	415_1	d__Bacteria	p__Pseudomonadota	c__Gammaproteobacteria	o__PS1	f__Thioglobaceae	g__Ruthia	s__Ruthia sp030599095
CONCOCT_CS10_bin.55	415_2	d__Bacteria	p__Pseudomonadota	c__Gammaproteobacteria	o__PS1	f__Thioglobaceae	g__Ruthia	s__Ruthia sp030599095
ComeBin_CS10_bin.33020	415_2	d__Bacteria	p__Pseudomonadota	c__Gammaproteobacteria	o__PS1	f__Thioglobaceae	g__Ruthia	s__Ruthia sp030599095
CompleteBin_CS10.1339	415_2	d__Bacteria	p__Pseudomonadota	c__Gammaproteobacteria	o__PS1	f__Thioglobaceae	g__Ruthia	s__Ruthia sp030599095
CompleteBin_CS10.983	415_2	d__Bacteria	p__Pseudomonadota	c__Gammaproteobacteria	o__PS1	f__Thioglobaceae	g__Ruthia	s__Ruthia sp030599095
MetaBAT2_CS10_bin.141	415_2	d__Bacteria	p__Pseudomonadota	c__Gammaproteobacteria	o__PS1	f__Thioglobaceae	g__Ruthia	s__Ruthia sp030599095
SemiBin2_CS10_SemiBin.78	415_2	d__Bacteria	p__Pseudomonadota	c__Gammaproteobacteria	o__PS1	f__Thioglobaceae	g__Ruthia	s__Ruthia sp030599095
VAMB_CS10_bin.14405	415_2	d__Bacteria	p__Pseudomonadota	c__Gammaproteobacteria	o__PS1	f__Thioglobaceae	g__Ruthia	s__Ruthia sp030599095
ComeBin_CS08_bin.291388	416_1	d__Bacteria	p__Desulfobacterota	c__Desulfobulbia	o__Desulfobulbales	f__Desulfurivibrionaceae	g__	s__
CompleteBin_CS08.322	416_1	d__Bacteria	p__Desulfobacterota	c__Desulfobulbia	o__Desulfobulbales	f__Desulfurivibrionaceae	g__	s__
ComeBin_CS10_bin.297327	416_2	d__Bacteria	p__Desulfobacterota	c__Desulfobulbia	o__Desulfobulbales	f__Desulfurivibrionaceae	g__	s__
CompleteBin_CS10.151	416_2	d__Bacteria	p__Desulfobacterota	c__Desulfobulbia	o__Desulfobulbales	f__Desulfurivibrionaceae	g__	s__
ComeBin_CS05_bin.147446	417_1	d__Bacteria	p__Pseudomonadota	c__Gammaproteobacteria	o__HK1	f__HK1	g__JAABYT01	s__
CompleteBin_CS05.468	417_1	d__Bacteria	p__Pseudomonadota	c__Gammaproteobacteria	o__HK1	f__HK1	g__JAABYT01	s__
CompleteBin_CS05.474	417_1	d__Bacteria	p__Pseudomonadota	c__Gammaproteobacteria	o__HK1	f__HK1	g__JAABYT01	s__
CONCOCT_CS03_bin.81	418_1	d__Bacteria	p__Pseudomonadota	c__Gammaproteobacteria	o__Arenicellales	f__Poriferihabitantaceae	g__	s__
ComeBin_CS03_bin.181190	418_1	d__Bacteria	p__Pseudomonadota	c__Gammaproteobacteria	o__Arenicellales	f__Poriferihabitantaceae	g__	s__
CompleteBin_CS03.561	418_1	d__Bacteria	p__Pseudomonadota	c__Gammaproteobacteria	o__Arenicellales	f__Poriferihabitantaceae	g__	s__
CONCOCT_CS05_bin.138	418_2	d__Bacteria	p__Pseudomonadota	c__Gammaproteobacteria	o__Arenicellales	f__Poriferihabitantaceae	g__	s__
ComeBin_CS05_bin.162532	418_2	d__Bacteria	p__Pseudomonadota	c__Gammaproteobacteria	o__Arenicellales	f__Poriferihabitantaceae	g__	s__
CompleteBin_CS05.562	418_2	d__Bacteria	p__Pseudomonadota	c__Gammaproteobacteria	o__Arenicellales	f__Poriferihabitantaceae	g__	s__
ComeBin_CS01_bin.89696	419_1	d__Bacteria	p__Planctomycetota	c__Planctomycetia	o__Pirellulales	f__Thermoguttaceae	g__JAHIKV01	s__
CompleteBin_CS01.436	419_1	d__Bacteria	p__Planctomycetota	c__Planctomycetia	o__Pirellulales	f__Thermoguttaceae	g__JAHIKV01	s__
MetaBAT2_CS01_bin.3	419_1	d__Bacteria	p__Planctomycetota	c__Planctomycetia	o__Pirellulales	f__Thermoguttaceae	g__JAHIKV01	s__
ComeBin_CS03_bin.105204	42_1	d__Archaea	p__Asgardarchaeota	c__Thorarchaeia	o__Thorarchaeales	f__Thorarchaeaceae	g__WTCK01	s__WTCK01 sp018238375
CompleteBin_CS03.127	42_1	d__Archaea	p__Asgardarchaeota	c__Thorarchaeia	o__Thorarchaeales	f__Thorarchaeaceae	g__WTCK01	s__WTCK01 sp018238375
CompleteBin_CS01.909	42_2	d__Archaea	p__Asgardarchaeota	c__Thorarchaeia	o__Thorarchaeales	f__Thorarchaeaceae	g__WTCK01	s__
CompleteBin_CS01.980	42_2	d__Archaea	p__Asgardarchaeota	c__Thorarchaeia	o__Thorarchaeales	f__Thorarchaeaceae	g__WTCK01	s__
CompleteBin_CS10.180	420_1	d__Bacteria	p__Pseudomonadota	c__Gammaproteobacteria	o__Methylococcales	f__Methylomonadaceae	g__Methyloprofundus	s__
CompleteBin_CS10.495	420_1	d__Bacteria	p__Pseudomonadota	c__Gammaproteobacteria	o__Methylococcales	f__Methylomonadaceae	g__Methyloprofundus	s__
CompleteBin_CS10.910	420_1	d__Bacteria	p__Pseudomonadota	c__Gammaproteobacteria	o__Methylococcales	f__Methylomonadaceae	g__Methyloprofundus	s__
CompleteBin_CS10.94	420_1	d__Bacteria	p__Pseudomonadota	c__Gammaproteobacteria	o__Methylococcales	f__Methylomonadaceae	g__Methyloprofundus	s__
CONCOCT_CS08_bin.212	421_1	d__Bacteria	p__Planctomycetota	c__Phycisphaerae	o__SM23-33	f__SM23-33	g__	s__
ComeBin_CS08_bin.353	421_1	d__Bacteria	p__Planctomycetota	c__Phycisphaerae	o__SM23-33	f__SM23-33	g__	s__
CompleteBin_CS08.350	421_1	d__Bacteria	p__Planctomycetota	c__Phycisphaerae	o__SM23-33	f__SM23-33	g__	s__
MetaBAT2_CS08_bin.97	421_1	d__Bacteria	p__Planctomycetota	c__Phycisphaerae	o__SM23-33	f__SM23-33	g__	s__
SemiBin2_CS08_SemiBin.3	421_1	d__Bacteria	p__Planctomycetota	c__Phycisphaerae	o__SM23-33	f__SM23-33	g__	s__
VAMB_CS08_bin.104945	421_1	d__Bacteria	p__Planctomycetota	c__Phycisphaerae	o__SM23-33	f__SM23-33	g__	s__
CONCOCT_CS01_bin.76	422_1	d__Bacteria	p__Planctomycetota	c__JAKEIC01	o__DYIT01	f__DYIT01	g__	s__
ComeBin_CS01_bin.2203	422_1	d__Bacteria	p__Planctomycetota	c__JAKEIC01	o__DYIT01	f__DYIT01	g__	s__
CompleteBin_CS01.2077	422_1	d__Bacteria	p__Planctomycetota	c__JAKEIC01	o__DYIT01	f__DYIT01	g__	s__
CompleteBin_CS01.389	422_1	d__Bacteria	p__Planctomycetota	c__JAKEIC01	o__DYIT01	f__DYIT01	g__	s__
CompleteBin_CS01.881	422_1	d__Bacteria	p__Planctomycetota	c__JAKEIC01	o__DYIT01	f__DYIT01	g__	s__
MetaBAT2_CS01_bin.79	422_1	d__Bacteria	p__Planctomycetota	c__JAKEIC01	o__DYIT01	f__DYIT01	g__	s__
SemiBin2_CS01_SemiBin.18	422_1	d__Bacteria	p__Planctomycetota	c__JAKEIC01	o__DYIT01	f__DYIT01	g__	s__
VAMB_CS01_bin.16697	422_1	d__Bacteria	p__Planctomycetota	c__JAKEIC01	o__DYIT01	f__DYIT01	g__	s__
ComeBin_CS12_bin.70495	423_1	d__Bacteria	p__Verrucomicrobiota	c__Kiritimatiellia	o__Kiritimatiellales	f__Tichowtungiaceae	g__Tichowtungia	s__
CompleteBin_CS12.2	423_1	d__Bacteria	p__Verrucomicrobiota	c__Kiritimatiellia	o__Kiritimatiellales	f__Tichowtungiaceae	g__Tichowtungia	s__
CONCOCT_CS10_bin.173	423_2	d__Bacteria	p__Verrucomicrobiota	c__Kiritimatiellia	o__Kiritimatiellales	f__Tichowtungiaceae	g__Tichowtungia	s__
ComeBin_CS10_bin.41376	423_2	d__Bacteria	p__Verrucomicrobiota	c__Kiritimatiellia	o__Kiritimatiellales	f__Tichowtungiaceae	g__Tichowtungia	s__
CompleteBin_CS10.1268	423_2	d__Bacteria	p__Verrucomicrobiota	c__Kiritimatiellia	o__Kiritimatiellales	f__Tichowtungiaceae	g__Tichowtungia	s__
MetaBAT2_CS10_bin.75	423_2	d__Bacteria	p__Verrucomicrobiota	c__Kiritimatiellia	o__Kiritimatiellales	f__Tichowtungiaceae	g__Tichowtungia	s__
SemiBin2_CS10_SemiBin.90	423_2	d__Bacteria	p__Verrucomicrobiota	c__Kiritimatiellia	o__Kiritimatiellales	f__Tichowtungiaceae	g__Tichowtungia	s__
ComeBin_CS10_bin.17988	424_1	d__Bacteria	p__Verrucomicrobiota	c__Kiritimatiellia	o__Kiritimatiellales	f__Tichowtungiaceae	g__Tichowtungia	s__
CompleteBin_CS10.1279	424_1	d__Bacteria	p__Verrucomicrobiota	c__Kiritimatiellia	o__Kiritimatiellales	f__Tichowtungiaceae	g__Tichowtungia	s__
CompleteBin_CS10.1290	424_1	d__Bacteria	p__Verrucomicrobiota	c__Kiritimatiellia	o__Kiritimatiellales	f__Tichowtungiaceae	g__Tichowtungia	s__
ComeBin_CS10_bin.1	425_1	d__Bacteria	p__Verrucomicrobiota	c__Kiritimatiellia	o__Kiritimatiellales	f__Pontiellaceae	g__Pontiella	s__Pontiella sp030595785
CompleteBin_CS10.750	425_1	d__Bacteria	p__Verrucomicrobiota	c__Kiritimatiellia	o__Kiritimatiellales	f__Pontiellaceae	g__Pontiella	s__Pontiella sp030595785
MetaBAT2_CS10_bin.32	425_1	d__Bacteria	p__Verrucomicrobiota	c__Kiritimatiellia	o__Kiritimatiellales	f__Pontiellaceae	g__Pontiella	s__Pontiella sp030595785
SemiBin2_CS10_SemiBin.4	425_1	d__Bacteria	p__Verrucomicrobiota	c__Kiritimatiellia	o__Kiritimatiellales	f__Pontiellaceae	g__Pontiella	s__Pontiella sp030595785
VAMB_CS10_bin.61383	425_1	d__Bacteria	p__Verrucomicrobiota	c__Kiritimatiellia	o__Kiritimatiellales	f__Pontiellaceae	g__Pontiella	s__Pontiella sp030595785
ComeBin_CS10_bin.212745	426_1	d__Bacteria	p__Verrucomicrobiota	c__Kiritimatiellia	o__Kiritimatiellales	f__Pontiellaceae	g__Pontiella	s__
CompleteBin_CS10.1378	426_1	d__Bacteria	p__Verrucomicrobiota	c__Kiritimatiellia	o__Kiritimatiellales	f__Pontiellaceae	g__Pontiella	s__
CompleteBin_CS10.333	426_1	d__Bacteria	p__Verrucomicrobiota	c__Kiritimatiellia	o__Kiritimatiellales	f__Pontiellaceae	g__Pontiella	s__
ComeBin_CS05_bin.304	427_1	d__Bacteria	p__Verrucomicrobiota	c__Kiritimatiellia	o__Kiritimatiellales	f__Pontiellaceae	g__Pontiella	s__
CompleteBin_CS05.185	427_1	d__Bacteria	p__Verrucomicrobiota	c__Kiritimatiellia	o__Kiritimatiellales	f__Pontiellaceae	g__Pontiella	s__
MetaBAT2_CS05_bin.51	427_1	d__Bacteria	p__Verrucomicrobiota	c__Kiritimatiellia	o__Kiritimatiellales	f__Pontiellaceae	g__Pontiella	s__
SemiBin2_CS05_SemiBin.4	427_1	d__Bacteria	p__Verrucomicrobiota	c__Kiritimatiellia	o__Kiritimatiellales	f__Pontiellaceae	g__Pontiella	s__
VAMB_CS05_bin.17362	427_1	d__Bacteria	p__Verrucomicrobiota	c__Kiritimatiellia	o__Kiritimatiellales	f__Pontiellaceae	g__Pontiella	s__
CompleteBin_CS08.19	428_1	d__Bacteria	p__Verrucomicrobiota	c__Kiritimatiellia	o__Kiritimatiellales	f__Pontiellaceae	g__Pontiella	s__
MetaBAT2_CS08_bin.139	428_1	d__Bacteria	p__Verrucomicrobiota	c__Kiritimatiellia	o__Kiritimatiellales	f__Pontiellaceae	g__Pontiella	s__
CompleteBin_CS12.95	428_2	d__Bacteria	p__Verrucomicrobiota	c__Kiritimatiellia	o__Kiritimatiellales	f__Pontiellaceae	g__Pontiella	s__
CompleteBin_CS10.1257	428_3	d__Bacteria	p__Verrucomicrobiota	c__Kiritimatiellia	o__Kiritimatiellales	f__Pontiellaceae	g__Pontiella	s__
ComeBin_CS01_bin.161	429_1	d__Bacteria	p__Patescibacteria	c__Gracilibacteria	o__UBA1369	f__LOWO2-01-FULL-3	g__WJKQ01	s__
CompleteBin_CS01.6	429_1	d__Bacteria	p__Patescibacteria	c__Gracilibacteria	o__UBA1369	f__LOWO2-01-FULL-3	g__WJKQ01	s__
MetaBAT2_CS01_bin.63	429_1	d__Bacteria	p__Patescibacteria	c__Gracilibacteria	o__UBA1369	f__LOWO2-01-FULL-3	g__WJKQ01	s__
SemiBin2_CS01_SemiBin.1	429_1	d__Bacteria	p__Patescibacteria	c__Gracilibacteria	o__UBA1369	f__LOWO2-01-FULL-3	g__WJKQ01	s__
VAMB_CS01_bin.55238	429_1	d__Bacteria	p__Patescibacteria	c__Gracilibacteria	o__UBA1369	f__LOWO2-01-FULL-3	g__WJKQ01	s__
CONCOCT_CS01_bin.155	43_1	d__Bacteria	p__Bipolaricaulota	c__Bipolaricaulia	o__UBA7950	f__UBA9294	g__SPBW01	s__SPBW01 sp023132545
ComeBin_CS01_bin.223160	43_1	d__Bacteria	p__Bipolaricaulota	c__Bipolaricaulia	o__UBA7950	f__UBA9294	g__SPBW01	s__SPBW01 sp023132545
CompleteBin_CS01.141	43_1	d__Bacteria	p__Bipolaricaulota	c__Bipolaricaulia	o__UBA7950	f__UBA9294	g__SPBW01	s__SPBW01 sp023132545
CompleteBin_CS01.28	43_1	d__Bacteria	p__Bipolaricaulota	c__Bipolaricaulia	o__UBA7950	f__UBA9294	g__SPBW01	s__SPBW01 sp023132545
CompleteBin_CS01.51	43_1	d__Bacteria	p__Bipolaricaulota	c__Bipolaricaulia	o__UBA7950	f__UBA9294	g__SPBW01	s__SPBW01 sp023132545
CompleteBin_CS01.700	43_1	d__Bacteria	p__Bipolaricaulota	c__Bipolaricaulia	o__UBA7950	f__UBA9294	g__SPBW01	s__SPBW01 sp023132545
CompleteBin_CS01.777	43_1	d__Bacteria	p__Bipolaricaulota	c__Bipolaricaulia	o__UBA7950	f__UBA9294	g__SPBW01	s__SPBW01 sp023132545
ComeBin_CS12_bin.953	430_1	d__Bacteria	p__Patescibacteria	c__Gracilibacteria	o__UBA1369	f__LOWO2-01-FULL-3	g__JAACEU01	s__
CompleteBin_CS12.25	430_1	d__Bacteria	p__Patescibacteria	c__Gracilibacteria	o__UBA1369	f__LOWO2-01-FULL-3	g__JAACEU01	s__
MetaBAT2_CS12_bin.206	430_1	d__Bacteria	p__Patescibacteria	c__Gracilibacteria	o__UBA1369	f__LOWO2-01-FULL-3	g__JAACEU01	s__
SemiBin2_CS12_SemiBin.12	430_1	d__Bacteria	p__Patescibacteria	c__Gracilibacteria	o__UBA1369	f__LOWO2-01-FULL-3	g__JAACEU01	s__
VAMB_CS12_bin.41982	430_1	d__Bacteria	p__Patescibacteria	c__Gracilibacteria	o__UBA1369	f__LOWO2-01-FULL-3	g__JAACEU01	s__
CONCOCT_CS01_bin.147	431_1	d__Bacteria	p__Bacteroidota	c__Bacteroidia	o__Bacteroidales	f__VadinHA17	g__JAUVKT01	s__JAUVKT01 sp030596125
ComeBin_CS01_bin.1112	431_1	d__Bacteria	p__Bacteroidota	c__Bacteroidia	o__Bacteroidales	f__VadinHA17	g__JAUVKT01	s__JAUVKT01 sp030596125
CompleteBin_CS01.273	431_1	d__Bacteria	p__Bacteroidota	c__Bacteroidia	o__Bacteroidales	f__VadinHA17	g__JAUVKT01	s__JAUVKT01 sp030596125
MetaBAT2_CS01_bin.77	431_1	d__Bacteria	p__Bacteroidota	c__Bacteroidia	o__Bacteroidales	f__VadinHA17	g__JAUVKT01	s__JAUVKT01 sp030596125
SemiBin2_CS01_SemiBin.11	431_1	d__Bacteria	p__Bacteroidota	c__Bacteroidia	o__Bacteroidales	f__VadinHA17	g__JAUVKT01	s__JAUVKT01 sp030596125
VAMB_CS01_bin.16539	431_1	d__Bacteria	p__Bacteroidota	c__Bacteroidia	o__Bacteroidales	f__VadinHA17	g__JAUVKT01	s__JAUVKT01 sp030596125
CONCOCT_CS01_bin.135	432_1	d__Bacteria	p__Bacillota_A	c__Clostridia	o__DUPQ01	f__DUPQ01	g__JAFGQE01	s__JAFGQE01 sp030592355
ComeBin_CS01_bin.212475	432_1	d__Bacteria	p__Bacillota_A	c__Clostridia	o__DUPQ01	f__DUPQ01	g__JAFGQE01	s__JAFGQE01 sp030592355
CompleteBin_CS01.1186	432_1	d__Bacteria	p__Bacillota_A	c__Clostridia	o__DUPQ01	f__DUPQ01	g__JAFGQE01	s__JAFGQE01 sp030592355
CompleteBin_CS01.733	432_1	d__Bacteria	p__Bacillota_A	c__Clostridia	o__DUPQ01	f__DUPQ01	g__JAFGQE01	s__JAFGQE01 sp030592355
CompleteBin_CS01.810	432_1	d__Bacteria	p__Bacillota_A	c__Clostridia	o__DUPQ01	f__DUPQ01	g__JAFGQE01	s__JAFGQE01 sp030592355
CONCOCT_CS10_bin.216	433_1	d__Bacteria	p__Bacillota_A	c__Clostridia	o__DUPQ01	f__DUPQ01	g__JAFGQE01	s__
ComeBin_CS10_bin.19357	433_1	d__Bacteria	p__Bacillota_A	c__Clostridia	o__DUPQ01	f__DUPQ01	g__JAFGQE01	s__
ComeBin_CS12_bin.200	433_1	d__Bacteria	p__Bacillota_A	c__Clostridia	o__DUPQ01	f__DUPQ01	g__JAFGQE01	s__
CompleteBin_CS10.1132	433_1	d__Bacteria	p__Bacillota_A	c__Clostridia	o__DUPQ01	f__DUPQ01	g__JAFGQE01	s__
CompleteBin_CS12.137	433_1	d__Bacteria	p__Bacillota_A	c__Clostridia	o__DUPQ01	f__DUPQ01	g__JAFGQE01	s__
CompleteBin_CS12.166	433_1	d__Bacteria	p__Bacillota_A	c__Clostridia	o__DUPQ01	f__DUPQ01	g__JAFGQE01	s__
CompleteBin_CS12.393	433_1	d__Bacteria	p__Bacillota_A	c__Clostridia	o__DUPQ01	f__DUPQ01	g__JAFGQE01	s__
MetaBAT2_CS10_bin.24	433_1	d__Bacteria	p__Bacillota_A	c__Clostridia	o__DUPQ01	f__DUPQ01	g__JAFGQE01	s__
MetaBAT2_CS12_bin.52	433_1	d__Bacteria	p__Bacillota_A	c__Clostridia	o__DUPQ01	f__DUPQ01	g__JAFGQE01	s__
SemiBin2_CS10_SemiBin.55	433_1	d__Bacteria	p__Bacillota_A	c__Clostridia	o__DUPQ01	f__DUPQ01	g__JAFGQE01	s__
SemiBin2_CS12_SemiBin.5	433_1	d__Bacteria	p__Bacillota_A	c__Clostridia	o__DUPQ01	f__DUPQ01	g__JAFGQE01	s__
VAMB_CS10_bin.16319	433_1	d__Bacteria	p__Bacillota_A	c__Clostridia	o__DUPQ01	f__DUPQ01	g__JAFGQE01	s__
VAMB_CS12_bin.15785	433_1	d__Bacteria	p__Bacillota_A	c__Clostridia	o__DUPQ01	f__DUPQ01	g__JAFGQE01	s__
CONCOCT_CS10_bin.71	434_1	d__Bacteria	p__Desulfobacterota	c__Anaeroferrophillalia	o__Anaeroferrophillales	f__Tharpellaceae	g__Tharpella	s__
ComeBin_CS10_bin.254214	434_1	d__Bacteria	p__Desulfobacterota	c__Anaeroferrophillalia	o__Anaeroferrophillales	f__Tharpellaceae	g__Tharpella	s__
CompleteBin_CS10.1250	434_1	d__Bacteria	p__Desulfobacterota	c__Anaeroferrophillalia	o__Anaeroferrophillales	f__Tharpellaceae	g__Tharpella	s__
CONCOCT_CS12_bin.262	434_2	d__Bacteria	p__Desulfobacterota	c__Anaeroferrophillalia	o__Anaeroferrophillales	f__Tharpellaceae	g__Tharpella	s__Tharpella sp021161425
ComeBin_CS12_bin.49106	434_2	d__Bacteria	p__Desulfobacterota	c__Anaeroferrophillalia	o__Anaeroferrophillales	f__Tharpellaceae	g__Tharpella	s__Tharpella sp021161425
CompleteBin_CS12.92	434_2	d__Bacteria	p__Desulfobacterota	c__Anaeroferrophillalia	o__Anaeroferrophillales	f__Tharpellaceae	g__Tharpella	s__Tharpella sp021161425
MetaBAT2_CS12_bin.173	434_2	d__Bacteria	p__Desulfobacterota	c__Anaeroferrophillalia	o__Anaeroferrophillales	f__Tharpellaceae	g__Tharpella	s__Tharpella sp021161425
SemiBin2_CS12_SemiBin.155	434_2	d__Bacteria	p__Desulfobacterota	c__Anaeroferrophillalia	o__Anaeroferrophillales	f__Tharpellaceae	g__Tharpella	s__Tharpella sp021161425
VAMB_CS12_bin.17223	434_2	d__Bacteria	p__Desulfobacterota	c__Anaeroferrophillalia	o__Anaeroferrophillales	f__Tharpellaceae	g__Tharpella	s__Tharpella sp021161425
CONCOCT_CS12_bin.205	435_1	d__Archaea	p__Asgardarchaeota	c__Thorarchaeia	o__Thorarchaeales	f__Thorarchaeaceae	g__	s__
ComeBin_CS12_bin.75094	435_1	d__Archaea	p__Asgardarchaeota	c__Thorarchaeia	o__Thorarchaeales	f__Thorarchaeaceae	g__	s__
CompleteBin_CS12.150	435_1	d__Archaea	p__Asgardarchaeota	c__Thorarchaeia	o__Thorarchaeales	f__Thorarchaeaceae	g__	s__
CompleteBin_CS12.164	435_1	d__Archaea	p__Asgardarchaeota	c__Thorarchaeia	o__Thorarchaeales	f__Thorarchaeaceae	g__	s__
SemiBin2_CS12_SemiBin.46	435_1	d__Archaea	p__Asgardarchaeota	c__Thorarchaeia	o__Thorarchaeales	f__Thorarchaeaceae	g__	s__
CONCOCT_CS03_bin.38	436_1	d__Archaea	p__Asgardarchaeota	c__Thorarchaeia	o__Thorarchaeales	f__Thorarchaeaceae	g__MP8T-1	s__MP8T-1 sp018238825
ComeBin_CS03_bin.147277	436_1	d__Archaea	p__Asgardarchaeota	c__Thorarchaeia	o__Thorarchaeales	f__Thorarchaeaceae	g__MP8T-1	s__MP8T-1 sp018238825
CompleteBin_CS03.405	436_1	d__Archaea	p__Asgardarchaeota	c__Thorarchaeia	o__Thorarchaeales	f__Thorarchaeaceae	g__MP8T-1	s__MP8T-1 sp018238825
CONCOCT_CS12_bin.221	436_2	d__Archaea	p__Asgardarchaeota	c__Thorarchaeia	o__Thorarchaeales	f__Thorarchaeaceae	g__MP8T-1	s__
ComeBin_CS12_bin.76927	436_2	d__Archaea	p__Asgardarchaeota	c__Thorarchaeia	o__Thorarchaeales	f__Thorarchaeaceae	g__MP8T-1	s__
CompleteBin_CS12.167	436_2	d__Archaea	p__Asgardarchaeota	c__Thorarchaeia	o__Thorarchaeales	f__Thorarchaeaceae	g__MP8T-1	s__
SemiBin2_CS12_SemiBin.231	436_2	d__Archaea	p__Asgardarchaeota	c__Thorarchaeia	o__Thorarchaeales	f__Thorarchaeaceae	g__MP8T-1	s__
VAMB_CS12_bin.12432	436_2	d__Archaea	p__Asgardarchaeota	c__Thorarchaeia	o__Thorarchaeales	f__Thorarchaeaceae	g__MP8T-1	s__
CompleteBin_CS01.512	436_3	d__Archaea	p__Asgardarchaeota	c__Thorarchaeia	o__Thorarchaeales	f__Thorarchaeaceae	g__MP8T-1	s__MP8T-1 sp018238825
CONCOCT_CS12_bin.284	437_1	d__Bacteria	p__Spirochaetota	c__B62-G9	o__B62-G9	f__DRHN01	g__DRHN01	s__DRHN01 sp030673105
ComeBin_CS12_bin.74048	437_1	d__Bacteria	p__Spirochaetota	c__B62-G9	o__B62-G9	f__DRHN01	g__DRHN01	s__DRHN01 sp030673105
CompleteBin_CS12.158	437_1	d__Bacteria	p__Spirochaetota	c__B62-G9	o__B62-G9	f__DRHN01	g__DRHN01	s__DRHN01 sp030673105
MetaBAT2_CS12_bin.23	437_1	d__Bacteria	p__Spirochaetota	c__B62-G9	o__B62-G9	f__DRHN01	g__DRHN01	s__DRHN01 sp030673105
SemiBin2_CS12_SemiBin.222	437_1	d__Bacteria	p__Spirochaetota	c__B62-G9	o__B62-G9	f__DRHN01	g__DRHN01	s__DRHN01 sp030673105
[truncated: 1,618 more rows]

## Sheet: Sheet2
query_name	seed_ortholog	evalue	score	eggNOG_OGs	max_annot_lvl	COG_Functional_Category	Description	Preferred_name	GOs	EC_number	KEGG_ko	KEGG_Pathway	KEGG_Module	KEGG_Reaction	KEGG_rclass	BRITE	KEGG_TC	CAZy	BiGG_Reaction	PFAMs
NODE_23_length_75334_cov_9.077950_28	1120999.JONM01000012_gene2242	0	2787	COG0823@1|root,COG0841@1|root,COG1361@1|root,COG1572@1|root,COG1657@1|root,COG2373@1|root,COG4733@1|root,COG0823@2|Bacteria,COG0841@2|Bacteria,COG1361@2|Bacteria,COG1572@2|Bacteria,COG1657@2|Bacteria,COG2373@2|Bacteria,COG4733@2|Bacteria,1QV7E@1224|Proteobacteria,2WHIN@28216|Betaproteobacteria	28216|Betaproteobacteria	M	TIGRFAM Outer membrane protein	-	-	-	ko:K13735,ko:K20276	ko02024,ko05100,map02024,map05100	-	-	-	ko00000,ko00001	-	-	-	Big_3_2
NODE_704_length_19962_cov_12.477269_4	1304877.KI519399_gene4996	1.85e-159	569	COG0454@1|root,COG0827@1|root,COG1203@1|root,COG0456@2|Bacteria,COG0827@2|Bacteria,COG1203@2|Bacteria,1QZ6D@1224|Proteobacteria,2U5JW@28211|Alphaproteobacteria	28211|Alphaproteobacteria	L	DNA restriction-modification system	-	-	-	-	-	-	-	-	-	-	-	-	AAA_34
NODE_23_length_75334_cov_9.077950_25	1120999.JONM01000012_gene2241	0	1050	COG1305@1|root,COG3209@1|root,COG1305@2|Bacteria,COG3209@2|Bacteria,1MVV1@1224|Proteobacteria,2VW6N@28216|Betaproteobacteria,2KSZP@206351|Neisseriales	206351|Neisseriales	M	RHS protein	-	-	-	-	-	-	-	-	-	-	-	-	RHS,RHS_repeat
NODE_282_length_18954_cov_6.627282_5	498211.CJA_3034	1.81e-307	1007	COG1196@1|root,COG1196@2|Bacteria,1NKHW@1224|Proteobacteria	1224|Proteobacteria	D	nuclear chromosome segregation	-	-	-	-	-	-	-	-	-	-	-	-	-
NODE_2939_length_10517_cov_5.342478_1	985665.HPL003_27225	1.03e-08	70.5	COG1404@1|root,COG3291@1|root,COG4412@1|root,COG1404@2|Bacteria,COG3291@2|Bacteria,COG4412@2|Bacteria,1TPUY@1239|Firmicutes,4HBDE@91061|Bacilli,26QNY@186822|Paenibacillaceae	91061|Bacilli	O	CarboxypepD_reg-like domain	bprF	-	-	ko:K13276	-	-	-	-	ko00000,ko01000,ko01002,ko03110	-	-	-	CarbopepD_reg_2,CarboxypepD_reg,Inhibitor_I9,PKD,Peptidase_M6,Peptidase_S8
NODE_1111_length_17682_cov_8.221365_6	96561.Dole_3254	0	1100	COG2885@1|root,COG3203@1|root,COG4719@1|root,COG2885@2|Bacteria,COG3203@2|Bacteria,COG4719@2|Bacteria,1QW22@1224|Proteobacteria,42NCQ@68525|delta/epsilon subdivisions,2WMJP@28221|Deltaproteobacteria,2MMHS@213118|Desulfobacterales	28221|Deltaproteobacteria	M	TIGRFAM conserved repeat domain	-	-	-	-	-	-	-	-	-	-	-	-	DUF11,OmpA
NODE_1959_length_10887_cov_6.912297_3	94624.Bpet2311	0	2372	COG0604@1|root,COG3321@1|root,COG0604@2|Bacteria,COG3321@2|Bacteria,1R89Z@1224|Proteobacteria,2VZWY@28216|Betaproteobacteria,3T328@506|Alcaligenaceae	28216|Betaproteobacteria	CQ	PKS_DH	wcbR	-	-	-	-	-	-	-	-	-	-	-	ADH_N,ADH_zinc_N,Acyl_transf_1,KAsynt_C_assoc,KR,Ketoacyl-synt_C,PP-binding,PS-DH,ketoacyl-synt
NODE_1243_length_15567_cov_8.960547_3	1408473.JHXO01000001_gene2295	0	2271	COG4797@1|root,COG4797@2|Bacteria,4PKQS@976|Bacteroidetes,2FP69@200643|Bacteroidia	976|Bacteroidetes	S	Motility related/secretion protein	sprA	-	-	-	-	-	-	-	-	-	-	-	SprA_N
NODE_3988_length_10146_cov_95.981370_2	1041930.Mtc_2269	8.88e-07	63.9	COG3210@1|root,arCOG07534@2157|Archaea,2XVS6@28890|Euryarchaeota	28890|Euryarchaeota	M	cell adhesion involved in biofilm formation	-	-	-	-	-	-	-	-	-	-	-	-	-
NODE_6595_length_8015_cov_11.441583_2	96561.Dole_3254	0	1273	COG2885@1|root,COG3203@1|root,COG4719@1|root,COG2885@2|Bacteria,COG3203@2|Bacteria,COG4719@2|Bacteria,1QW22@1224|Proteobacteria,42NCQ@68525|delta/epsilon subdivisions,2WMJP@28221|Deltaproteobacteria,2MMHS@213118|Desulfobacterales	28221|Deltaproteobacteria	M	TIGRFAM conserved repeat domain	-	-	-	-	-	-	-	-	-	-	-	-	DUF11,OmpA
NODE_149_length_36753_cov_5.773639_5	459349.CLOAM0164	2.51e-30	140	COG1520@1|root,COG1520@2|Bacteria	2|Bacteria	S	amino acid activation for nonribosomal peptide biosynthetic process	-	-	-	-	-	-	-	-	-	-	-	-	SBBP
NODE_922_length_17925_cov_38.427588_9	398767.Glov_1997	3.41e-24	118	COG1470@1|root,COG1470@2|Bacteria,1MZXY@1224|Proteobacteria,432M7@68525|delta/epsilon subdivisions,2WXW8@28221|Deltaproteobacteria	28221|Deltaproteobacteria	S	F5/8 type C domain	-	-	-	-	-	-	-	-	-	-	-	-	F5_F8_type_C
NODE_5861_length_7464_cov_4.148063_1	269799.Gmet_2043	8.56e-56	225	COG1361@1|root,COG4932@1|root,COG1361@2|Bacteria,COG4932@2|Bacteria,1QUEG@1224|Proteobacteria,42YJZ@68525|delta/epsilon subdivisions,2WWPU@28221|Deltaproteobacteria	28221|Deltaproteobacteria	KM	SdrD B-like domain	-	-	-	-	-	-	-	-	-	-	-	-	SdrD_B,TGFb_propeptide
NODE_14_length_86429_cov_11.312444_96	397291.C804_05820	6.28e-13	82	COG0338@1|root,COG0338@2|Bacteria,1V1FT@1239|Firmicutes,250FC@186801|Clostridia	186801|Clostridia	L	Putative phage serine protease XkdF	-	-	-	-	-	-	-	-	-	-	-	-	Peptidase_S78_2
NODE_2981_length_9593_cov_8.189138_1	573061.Clocel_0020	1.55e-38	168	COG0747@1|root,COG2247@1|root,COG2356@1|root,COG2374@1|root,COG2931@1|root,COG3210@1|root,COG4733@1|root,COG5492@1|root,COG0747@2|Bacteria,COG2247@2|Bacteria,COG2356@2|Bacteria,COG2374@2|Bacteria,COG2931@2|Bacteria,COG3210@2|Bacteria,COG4733@2|Bacteria,COG5492@2|Bacteria,1UIDC@1239|Firmicutes,25EIG@186801|Clostridia	186801|Clostridia	N	Cadherin-like beta sandwich domain	-	-	-	-	-	-	-	-	-	-	-	-	Cadherin-like
NODE_1662_length_11658_cov_5.380591_4	984262.SGRA_2179	2.15e-14	87	COG5306@1|root,COG5306@2|Bacteria	2|Bacteria	-	-	-	-	3.4.14.5	ko:K01278,ko:K03561	ko04974,map04974	-	-	-	ko00000,ko00001,ko01000,ko01002,ko02000,ko04090,ko04147	1.A.30.2.1	-	-	DUF1735,DUF2341,Laminin_G_3,fn3
NODE_1915_length_14078_cov_9.832703_8	1122194.AUHU01000015_gene2999	0	1060	COG0643@1|root,COG0745@1|root,COG2198@1|root,COG0643@2|Bacteria,COG0745@2|Bacteria,COG2198@2|Bacteria,1MUAG@1224|Proteobacteria,1RMS6@1236|Gammaproteobacteria,4650G@72275|Alteromonadaceae	1236|Gammaproteobacteria	T	COG0643 Chemotaxis protein histidine kinase and related kinases	chpA	-	-	ko:K02487,ko:K06596	ko02020,ko02025,map02020,map02025	M00507	-	-	ko00000,ko00001,ko00002,ko01001,ko02022,ko02035	-	-	-	CheW,H-kinase_dim,HATPase_c,Hpt,Response_reg
NODE_149_length_36753_cov_5.773639_8	313606.M23134_05475	0	1796	COG2373@1|root,COG2373@2|Bacteria,4NED2@976|Bacteroidetes,47MEM@768503|Cytophagia	976|Bacteroidetes	S	Alpha-2-macroglobulin family	-	-	-	-	-	-	-	-	-	-	-	-	A2M,A2M_N,A2M_N_2,CarbopepD_reg_2,Plug
NODE_3457_length_8952_cov_8.880859_3	926569.ANT_25660	0	1303	COG2373@1|root,COG2373@2|Bacteria,2G5XN@200795|Chloroflexi	200795|Chloroflexi	S	PFAM alpha-2-macroglobulin domain protein	-	-	-	ko:K06894	-	-	-	-	ko00000	-	-	-	A2M,A2M_N,A2M_N_2,A2M_comp,Big_5,MG1
NODE_3442_length_9743_cov_5.458505_2	468059.AUHA01000003_gene1835	1.87e-226	729	COG1404@1|root,COG1404@2|Bacteria,4NHSQ@976|Bacteroidetes,1IWJ1@117747|Sphingobacteriia	976|Bacteroidetes	O	Subtilase family	-	-	-	-	-	-	-	-	-	-	-	-	Peptidase_S8
NODE_1404_length_10966_cov_4.781505_4	745014.OMB55_00004530	0	1439	COG1404@1|root,COG1404@2|Bacteria,1MU3S@1224|Proteobacteria,1RSP9@1236|Gammaproteobacteria,1JABS@118884|unclassified Gammaproteobacteria	1236|Gammaproteobacteria	O	Belongs to the peptidase S8 family	-	-	-	-	-	-	-	-	-	-	-	-	PKD,P_proprotein,Peptidase_S8
NODE_5291_length_8889_cov_5.674666_2	1121129.KB903368_gene743	0	1149	COG2373@1|root,COG2373@2|Bacteria,4NEW9@976|Bacteroidetes,2FP6Z@200643|Bacteroidia,22WXY@171551|Porphyromonadaceae	976|Bacteroidetes	S	Alpha-2-Macroglobulin	-	-	-	ko:K06894	-	-	-	-	ko00000	-	-	-	A2M,A2M_N,A2M_N_2,MG1,Thiol-ester_cl
NODE_6606_length_7049_cov_7.718187_3	1121878.AUGL01000024_gene3725	0.000724	53.9	COG0824@1|root,COG1520@1|root,COG2133@1|root,COG2273@1|root,COG3291@1|root,COG3507@1|root,COG3866@1|root,COG4733@1|root,COG0824@2|Bacteria,COG1520@2|Bacteria,COG2133@2|Bacteria,COG2273@2|Bacteria,COG3291@2|Bacteria,COG3507@2|Bacteria,COG3866@2|Bacteria,COG4733@2|Bacteria	2|Bacteria	S	cellulase activity	-	-	3.2.1.31,3.2.1.45	ko:K01195,ko:K01201,ko:K07107,ko:K20276	ko00040,ko00511,ko00531,ko00600,ko00860,ko00944,ko00983,ko01100,ko01110,ko02024,ko04142,map00040,map00511,map00531,map00600,map00860,map00944,map00983,map01100,map01110,map02024,map04142	M00014,M00076,M00077,M00078,M00129	R01478,R01498,R04979,R07818,R08127,R08260,R10830	RC00055,RC00059,RC00171,RC00451,RC00529,RC00530,RC00714,RC01251	ko00000,ko00001,ko00002,ko01000	-	GH30	-	CBM_6,DUF1349,GSDH,PKD,RicinB_lectin_2,ThuA
NODE_2023_length_13782_cov_8.114227_8	525897.Dbac_1252	8.97e-59	233	COG1672@1|root,COG1672@2|Bacteria	2|Bacteria	-	-	-	-	-	ko:K06921	-	-	-	-	ko00000	-	-	-	AAA_16,AAA_22,GGDEF,KAP_NTPase,Mrr_cat,NACHT,NB-ARC,SIR2_2
NODE_3916_length_7333_cov_4.202528_4	1532557.JL37_04945	0	1640	COG0178@1|root,COG0178@2|Bacteria,1MW0W@1224|Proteobacteria,2VI87@28216|Betaproteobacteria,3T1BB@506|Alcaligenaceae	28216|Betaproteobacteria	L	The UvrABC repair system catalyzes the recognition and processing of DNA lesions. UvrA is an ATPase and a DNA-binding protein. A damage recognition complex composed of 2 UvrA and 2 UvrB subunits scans DNA for abnormalities. When the presence of a lesion has been verified by UvrB, the UvrA molecules dissociate	uvrA2	-	-	ko:K03701	ko03420,map03420	-	-	-	ko00000,ko00001,ko03400	-	-	-	ABC_tran
NODE_1498_length_14312_cov_5.017044_7	1237149.C900_02497	8.76e-85	318	COG1404@1|root,COG3391@1|root,COG1404@2|Bacteria,COG3391@2|Bacteria,4NF1M@976|Bacteroidetes,47NC9@768503|Cytophagia	976|Bacteroidetes	O	Subtilase family	-	-	-	-	-	-	-	-	-	-	-	-	Peptidase_S8,Peptidase_S8_N
NODE_8101_length_6428_cov_9.509964_1	314278.NB231_10618	1.16e-17	99	COG1474@1|root,COG1474@2|Bacteria,1R5I2@1224|Proteobacteria,1RXXF@1236|Gammaproteobacteria,1WVZI@135613|Chromatiales	135613|Chromatiales	LO	Belongs to the peptidase S16 family	-	-	-	-	-	-	-	-	-	-	-	-	-
NODE_1764_length_11361_cov_13.085972_2	686340.Metal_0570	0	1112	COG1201@1|root,COG1205@1|root,COG1201@2|Bacteria,COG1205@2|Bacteria,1MVGH@1224|Proteobacteria,1RYMK@1236|Gammaproteobacteria	1236|Gammaproteobacteria	L	COG1205 Distinct helicase family with a unique C-terminal domain including a metal-binding cysteine cluster	-	-	-	ko:K06877	-	-	-	-	ko00000	-	-	-	DEAD,DUF1998,Helicase_C
NODE_4163_length_8838_cov_5.201981_2	1191523.MROS_0088	2.92e-07	64.3	COG0739@1|root,COG0739@2|Bacteria	2|Bacteria	M	heme binding	-	-	-	-	-	-	-	-	-	-	-	-	APH,Aminotran_3,Peptidase_M23
NODE_2851_length_10702_cov_8.354842_5	1185876.BN8_00772	9.44e-201	674	COG3209@1|root,COG3291@1|root,COG3209@2|Bacteria,COG3291@2|Bacteria,4NDZC@976|Bacteroidetes,47MNQ@768503|Cytophagia	976|Bacteroidetes	O	SprB repeat	-	-	-	-	-	-	-	-	-	-	-	-	CHU_C,PKD,SprB,TIG
NODE_5412_length_7762_cov_5.889581_3	1313421.JHBV01000009_gene4138	6.88e-178	588	COG3291@1|root,COG3291@2|Bacteria,4PMDA@976|Bacteroidetes	976|Bacteroidetes	O	domain protein	-	-	-	-	-	-	-	-	-	-	-	-	-
NODE_12240_length_5991_cov_11.939690_2	1056820.KB900629_gene1821	0	1081	COG2373@1|root,COG2373@2|Bacteria,1MV7J@1224|Proteobacteria,1RNRY@1236|Gammaproteobacteria,2PPSK@256005|Alteromonadales genera incertae sedis	1236|Gammaproteobacteria	S	Alpha-2-Macroglobulin	yfhM	GO:0003674,GO:0004857,GO:0004866,GO:0005575,GO:0005623,GO:0005886,GO:0008150,GO:0009892,GO:0009897,GO:0009986,GO:0010466,GO:0010605,GO:0010951,GO:0016020,GO:0019222,GO:0030162,GO:0030234,GO:0030414,GO:0031224,GO:0031225,GO:0031226,GO:0031233,GO:0031323,GO:0031324,GO:0031362,GO:0032268,GO:0032269,GO:0043086,GO:0044092,GO:0044425,GO:0044459,GO:0044464,GO:0045861,GO:0046658,GO:0048519,GO:0048523,GO:…	-	ko:K06894	-	-	-	-	ko00000	-	-	-	A2M,A2M_N,A2M_N_2,A2M_comp,MG1,Thiol-ester_cl
NODE_3086_length_9461_cov_3.353285_1	387093.SUN_2020	2.51e-33	149	COG2304@1|root,COG2304@2|Bacteria,1PBVT@1224|Proteobacteria,42RQ5@68525|delta/epsilon subdivisions,2YRDH@29547|Epsilonproteobacteria	29547|Epsilonproteobacteria	S	von Willebrand factor type A domain	-	-	-	ko:K07114	-	-	-	-	ko00000,ko02000	1.A.13.2.2,1.A.13.2.3	-	-	VWA
NODE_2595_length_11195_cov_10.856822_7	1499967.BAYZ01000061_gene5947	1.15e-70	271	COG0515@1|root,COG2319@1|root,COG0515@2|Bacteria,COG2319@2|Bacteria,2NQ8Y@2323|unclassified Bacteria	2|Bacteria	KLT	WD40 repeats	toxC	-	-	ko:K20332	ko02024,map02024	-	-	-	ko00000,ko00001	-	-	-	Pkinase,WD40
NODE_1342_length_15025_cov_6.032933_2	945713.IALB_0843	6.09e-86	311	COG4409@1|root,COG4409@2|Bacteria	2|Bacteria	G	exo-alpha-(2->6)-sialidase activity	-	-	-	-	-	-	-	-	-	-	-	-	CelD_N,Glyco_hydro_9,Laminin_G_3
NODE_7624_length_5717_cov_7.927764_1	765913.ThidrDRAFT_1810	1.25e-43	184	COG3291@1|root,COG3291@2|Bacteria,1R5MU@1224|Proteobacteria,1RZ6G@1236|Gammaproteobacteria,1X1H2@135613|Chromatiales	135613|Chromatiales	S	Repeats in polycystic kidney disease 1 (PKD1) and other proteins	-	-	-	-	-	-	-	-	-	-	-	-	PKD
NODE_4268_length_7137_cov_4.073143_1	1121481.AUAS01000008_gene3001	3.54e-32	146	COG1404@1|root,COG1404@2|Bacteria,4NFMW@976|Bacteroidetes,47X9G@768503|Cytophagia	976|Bacteroidetes	O	PFAM peptidase S8 and S53 subtilisin kexin sedolisin	-	-	-	-	-	-	-	-	-	-	-	-	PKD,Peptidase_S8
NODE_4593_length_8405_cov_7.428144_4	1121481.AUAS01000008_gene3001	6e-32	145	COG1404@1|root,COG1404@2|Bacteria,4NFMW@976|Bacteroidetes,47X9G@768503|Cytophagia	976|Bacteroidetes	O	PFAM peptidase S8 and S53 subtilisin kexin sedolisin	-	-	-	-	-	-	-	-	-	-	-	-	PKD,Peptidase_S8
NODE_7748_length_6560_cov_5.356802_2	880073.Calab_1858	0	951	COG1361@1|root,COG4447@1|root,COG4935@1|root,COG1361@2|Bacteria,COG4447@2|Bacteria,COG4935@2|Bacteria	2|Bacteria	O	Belongs to the peptidase S8 family	-	-	-	-	-	-	-	-	-	-	-	-	CHU_C,FlgD_ig,TM_helix
NODE_644_length_20752_cov_7.805914_4	1120951.AUBG01000006_gene370	2.72e-100	361	COG0366@1|root,COG3291@1|root,COG3866@1|root,COG4886@1|root,COG0366@2|Bacteria,COG3291@2|Bacteria,COG3866@2|Bacteria,COG4886@2|Bacteria,4NMJ3@976|Bacteroidetes,1HYVY@117743|Flavobacteriia	976|Bacteroidetes	I	leucine- rich repeat protein	-	-	-	-	-	-	-	-	-	-	-	-	-
NODE_1467_length_15753_cov_12.919926_9	5911.EAR97251	1.7e-13	84.7	KOG0580@1|root,KOG0580@2759|Eukaryota,3ZAMY@5878|Ciliophora	5878|Ciliophora	T	kinase domain containing protein	-	-	-	-	-	-	-	-	-	-	-	-	Pkinase
NODE_3306_length_7862_cov_4.691687_2	411470.RUMGNA_03411	3.57e-17	97.4	COG0845@1|root,COG3669@1|root,COG3934@1|root,COG4447@1|root,COG0845@2|Bacteria,COG3669@2|Bacteria,COG3934@2|Bacteria,COG4447@2|Bacteria,1TSG7@1239|Firmicutes,247VJ@186801|Clostridia,3Y044@572511|Blautia	186801|Clostridia	G	COG COG3669 Alpha-L-fucosidase	-	-	3.2.1.51	ko:K01206	ko00511,map00511	-	-	-	ko00000,ko00001,ko01000,ko04147	-	GH29	-	Alpha_L_fucos,Calx-beta,F5_F8_type_C,FIVAR,Gram_pos_anchor
NODE_346_length_17634_cov_4.549349_6	1170562.Cal6303_0430	3.16e-64	251	COG2730@1|root,COG3291@1|root,COG2730@2|Bacteria,COG3291@2|Bacteria,1GHMR@1117|Cyanobacteria,1HKJG@1161|Nostocales	1117|Cyanobacteria	N	Pkd domain containing protein	-	-	-	-	-	-	-	-	-	-	-	-	-
NODE_1652_length_13677_cov_5.733226_2	1347342.BN863_20850	4.76e-153	513	COG0642@1|root,COG0745@1|root,COG3292@1|root,COG0745@2|Bacteria,COG2205@2|Bacteria,COG3292@2|Bacteria,4NDXU@976|Bacteroidetes,1HXUN@117743|Flavobacteriia	976|Bacteroidetes	T	Histidine kinase-, DNA gyrase B-, and HSP90-like ATPase	-	-	-	-	-	-	-	-	-	-	-	-	HATPase_c,HTH_18,HisKA,Reg_prop,Response_reg,Y_Y_Y
NODE_5965_length_7397_cov_9.523699_2	28115.HR11_05950	0	2061	COG0210@1|root,COG0514@1|root,COG0210@2|Bacteria,COG0514@2|Bacteria,4NIAS@976|Bacteroidetes,2FP12@200643|Bacteroidia,22W5W@171551|Porphyromonadaceae	976|Bacteroidetes	L	DNA helicase	-	-	3.6.4.12	ko:K03654	ko03018,map03018	-	-	-	ko00000,ko00001,ko01000,ko03400	-	-	-	AAA_19,DEAD,Helicase_C,UvrD-helicase,UvrD_C
NODE_3501_length_9653_cov_9.284330_2	589924.Ferp_0670	1.92e-11	78.6	arCOG08705@1|root,arCOG08705@2157|Archaea	2157|Archaea	-	-	-	-	3.5.1.28	ko:K01448	ko01503,map01503	M00727	R04112	RC00064,RC00141	ko00000,ko00001,ko00002,ko01000,ko01011,ko03036	-	-	-	-
NODE_4196_length_9881_cov_13.929168_1	344747.PM8797T_26205	4.39e-260	795	COG1520@1|root,COG1520@2|Bacteria	2|Bacteria	S	amino acid activation for nonribosomal peptide biosynthetic process	-	-	1.1.2.6	ko:K05889	-	-	R03136	-	ko00000,ko01000	-	-	-	DUF1863,PQQ,PQQ_2,PQQ_3
NODE_11136_length_4939_cov_5.761261_2	1121904.ARBP01000006_gene4035	1.1e-70	269	COG2208@1|root,COG3292@1|root,COG2208@2|Bacteria,COG3292@2|Bacteria,4NHSC@976|Bacteroidetes,47XEJ@768503|Cytophagia	976|Bacteroidetes	KT	Sigma factor PP2C-like phosphatases	-	-	-	-	-	-	-	-	-	-	-	-	HisKA_3,Reg_prop,SpoIIE,Y_Y_Y
NODE_1616_length_15116_cov_11.491999_1	1250005.PHEL85_1694	1.39e-124	436	COG0674@1|root,COG1013@1|root,COG1014@1|root,COG1145@1|root,COG1146@1|root,COG0674@2|Bacteria,COG1013@2|Bacteria,COG1014@2|Bacteria,COG1145@2|Bacteria,COG1146@2|Bacteria,4NF4F@976|Bacteroidetes,1HXEG@117743|Flavobacteriia	976|Bacteroidetes	C	Pyruvate flavodoxin/ferredoxin oxidoreductase, thiamine diP-bdg	nifJ	-	1.2.7.1	ko:K03737	ko00010,ko00020,ko00620,ko00650,ko00720,ko01100,ko01120,ko01130,ko01200,map00010,map00020,map00620,map00650,map00720,map01100,map01120,map01130,map01200	M00173,M00307	R01196,R10866	RC00004,RC02742	br01601,ko00000,ko00001,ko00002,ko01000	-	-	-	EKR,Fer4_16,Fer4_7,PFOR_II,POR,POR_N,TPP_enzyme_C
NODE_140_length_40971_cov_16.283434_7	1449126.JQKL01000011_gene3549	0	1403	COG0493@1|root,COG1148@1|root,COG0493@2|Bacteria,COG1148@2|Bacteria,1TQ1A@1239|Firmicutes,248EK@186801|Clostridia,267YC@186813|unclassified Clostridiales	186801|Clostridia	C	Psort location Cytoplasmic, score	-	-	-	-	-	-	-	-	-	-	-	-	Fer4,Fer4_20,Fer4_7,NAD_binding_8,Pyr_redox_2
NODE_265_length_31366_cov_15.294593_34	1123053.AUDG01000007_gene3122	6.01e-40	172	COG5281@1|root,COG5283@1|root,COG5281@2|Bacteria,COG5283@2|Bacteria,1MX2R@1224|Proteobacteria,1S3MM@1236|Gammaproteobacteria	1236|Gammaproteobacteria	M	tape measure protein	Z012_10445	-	-	-	-	-	-	-	-	-	-	-	Phage_HK97_TLTM,Tape_meas_lam_C
NODE_4799_length_8226_cov_7.664056_2	1408473.JHXO01000009_gene3333	0	1488	COG0841@1|root,COG1131@1|root,COG0841@2|Bacteria,COG1131@2|Bacteria,4NF8M@976|Bacteroidetes,2FQY7@200643|Bacteroidia	976|Bacteroidetes	V	Belongs to the resistance-nodulation-cell division (RND) (TC 2.A.6) family	-	-	-	-	-	-	-	-	-	-	-	-	ABC_tran,ACR_tran
NODE_3745_length_7494_cov_3.920016_2	1408473.JHXO01000009_gene3333	0	1459	COG0841@1|root,COG1131@1|root,COG0841@2|Bacteria,COG1131@2|Bacteria,4NF8M@976|Bacteroidetes,2FQY7@200643|Bacteroidia	976|Bacteroidetes	V	Belongs to the resistance-nodulation-cell division (RND) (TC 2.A.6) family	-	-	-	-	-	-	-	-	-	-	-	-	ABC_tran,ACR_tran
NODE_134_length_41643_cov_89.883548_12	445971.ANASTE_00728	1.3e-08	69.3	COG0503@1|root,COG0503@2|Bacteria,1TSYQ@1239|Firmicutes	1239|Firmicutes	F	Transcription regulator that activates transcription by stimulating RNA polymerase (RNAP) recycling in case of stress conditions such as supercoiled DNA or high salt concentrations. Probably acts by releasing the RNAP, when it is trapped or immobilized on tightly supercoiled DNA. Does not activate transcription on linear DNA. Probably not involved in DNA repair	-	-	-	-	-	-	-	-	-	-	-	-	SLT
NODE_4848_length_8192_cov_17.721519_2	765912.Thimo_1753	3.74e-92	337	COG3209@1|root,COG3209@2|Bacteria,1MVV1@1224|Proteobacteria,1RP75@1236|Gammaproteobacteria,1WWJF@135613|Chromatiales	135613|Chromatiales	M	TIGRFAM RHS repeat-associated core domain	-	-	-	-	-	-	-	-	-	-	-	-	RHS,RHS_repeat
NODE_3232_length_8763_cov_19.457855_5	1249627.D779_0855	0	2443	COG0067@1|root,COG0069@1|root,COG0070@1|root,COG0067@2|Bacteria,COG0069@2|Bacteria,COG0070@2|Bacteria,1MU7B@1224|Proteobacteria,1RN2W@1236|Gammaproteobacteria,1WWAR@135613|Chromatiales	135613|Chromatiales	E	glutamate synthase	-	-	1.4.1.13,1.4.1.14	ko:K00265	ko00250,ko00910,ko01100,ko01110,ko01120,ko01130,ko01230,map00250,map00910,map01100,map01110,map01120,map01130,map01230	-	R00093,R00114,R00248	RC00006,RC00010,RC02799	ko00000,ko00001,ko01000	-	-	-	GATase_2,GXGXG,Glu_syn_central,Glu_synthase
NODE_1035_length_14168_cov_16.568908_4	1049564.TevJSym_aq00810	0	1027	COG0674@1|root,COG1013@1|root,COG1144@1|root,COG1146@1|root,COG0674@2|Bacteria,COG1013@2|Bacteria,COG1144@2|Bacteria,COG1146@2|Bacteria,1MVM0@1224|Proteobacteria,1RNNX@1236|Gammaproteobacteria	2|Bacteria	C	Oxidoreductase required for the transfer of electrons from pyruvate to flavodoxin	forE	-	1.2.7.1	ko:K00171,ko:K00172,ko:K02573,ko:K03737,ko:K13795,ko:K18930	ko00010,ko00020,ko00620,ko00633,ko00640,ko00650,ko00680,ko00720,ko01100,ko01120,ko01130,ko01200,map00010,map00020,map00620,map00633,map00640,map00650,map00680,map00720,map01100,map01120,map01130,map01200	M00173,M00307,M00374,M00620	R01196,R01199,R08034,R10866	RC00004,RC00250,RC02742,RC02833	br01601,ko00000,ko00001,ko00002,ko01000	-	-	-	CCG,Fer4,Fer4_4,Fer4_6,Fer4_9,Nitroreductase,PFOR_II,POR,POR_N,TPP_enzyme_C
NODE_4651_length_9436_cov_9.279181_2	983544.Lacal_2064	3.51e-23	117	COG2866@1|root,COG2866@2|Bacteria,4PNBM@976|Bacteroidetes,1IK2E@117743|Flavobacteriia	976|Bacteroidetes	E	Zn_pept	-	-	-	-	-	-	-	-	-	-	-	-	Cu-binding_MopE,HYR,MAM,Peptidase_M14,fn3
NODE_2565_length_11241_cov_5.277847_8	1408473.JHXO01000004_gene166	2.34e-149	502	COG2911@1|root,COG2911@2|Bacteria,4NF7F@976|Bacteroidetes,2FNBJ@200643|Bacteroidia	976|Bacteroidetes	S	Psort location OuterMembrane, score 9.49	-	-	-	-	-	-	-	-	-	-	-	-	TamB
NODE_4762_length_8256_cov_7.027070_2	1463825.JNXC01000023_gene4924	0.000253	54.7	COG2133@1|root,COG2133@2|Bacteria,2GISM@201174|Actinobacteria,4DXUN@85010|Pseudonocardiales	201174|Actinobacteria	G	PFAM Glucose Sorbosone dehydrogenase	-	-	-	-	-	-	-	-	-	-	-	-	F5_F8_type_C,GSDH,RicinB_lectin_2,Ricin_B_lectin,fn3
NODE_12827_length_4963_cov_8.698248_1	387631.Asulf_00088	3.22e-16	93.6	COG0614@1|root,arCOG03439@1|root,arCOG03439@2157|Archaea,arCOG03611@2157|Archaea,2XXWR@28890|Euryarchaeota	28890|Euryarchaeota	P	PFAM periplasmic copper-binding	-	-	-	-	-	-	-	-	-	-	-	-	Beta_helix,NosD,PKD
NODE_94_length_45813_cov_6.459898_48	1123236.KB899379_gene1390	3.15e-08	66.6	COG1520@1|root,COG1520@2|Bacteria,1MXIJ@1224|Proteobacteria,1RN4V@1236|Gammaproteobacteria,4648Z@72275|Alteromonadaceae	1236|Gammaproteobacteria	M	Part of the outer membrane protein assembly complex, which is involved in assembly and insertion of beta-barrel proteins into the outer membrane	bamB	GO:0003674,GO:0003824,GO:0005488,GO:0005515,GO:0005575,GO:0005623,GO:0008104,GO:0008150,GO:0008152,GO:0009279,GO:0009987,GO:0016020,GO:0016043,GO:0016491,GO:0019867,GO:0022607,GO:0030312,GO:0030313,GO:0031224,GO:0031230,GO:0031241,GO:0031246,GO:0031975,GO:0032991,GO:0033036,GO:0034613,GO:0042802,GO:0043163,GO:0043165,GO:0044085,GO:0044091,GO:0044425,GO:0044462,GO:0044464,GO:0045184,GO:0045229,GO:…	-	ko:K17713	-	-	-	-	ko00000,ko02000	1.B.33.1	-	-	PQQ_2,PQQ_3
NODE_2883_length_10611_cov_9.095017_2	398512.JQKC01000015_gene4663	7.47e-78	288	COG5184@1|root,COG5337@1|root,COG5184@2|Bacteria,COG5337@2|Bacteria,1TRAW@1239|Firmicutes,24AQY@186801|Clostridia,3WI9B@541000|Ruminococcaceae	186801|Clostridia	M	Fn3 associated	-	-	-	-	-	-	-	-	-	-	-	-	CHB_HEX_C_1,CotH,Fn3_assoc,LTD
NODE_2380_length_10712_cov_4.497513_3	1453500.AT05_08315	1.65e-273	831	28I1Q@1|root,2Z869@2|Bacteria,4NH2E@976|Bacteroidetes	976|Bacteroidetes	-	-	-	-	-	-	-	-	-	-	-	-	-	-	-
NODE_594_length_23003_cov_11.869400_6	395493.BegalDRAFT_2300	0	2002	COG0067@1|root,COG0069@1|root,COG0067@2|Bacteria,COG0069@2|Bacteria,1MU7B@1224|Proteobacteria,1RN2W@1236|Gammaproteobacteria,45ZWV@72273|Thiotrichales	72273|Thiotrichales	E	Glutamate synthase	gltB	-	1.4.1.13,1.4.1.14	ko:K00265	ko00250,ko00910,ko01100,ko01110,ko01120,ko01130,ko01230,map00250,map00910,map01100,map01110,map01120,map01130,map01230	-	R00093,R00114,R00248	RC00006,RC00010,RC02799	ko00000,ko00001,ko01000	-	-	-	GATase_2,GXGXG,Glu_syn_central,Glu_synthase
NODE_8179_length_6105_cov_8.185950_2	1125863.JAFN01000001_gene1552	0	1563	COG0493@1|root,COG1148@1|root,COG0493@2|Bacteria,COG1148@2|Bacteria,1QUM4@1224|Proteobacteria,42MPP@68525|delta/epsilon subdivisions,2WJ3U@28221|Deltaproteobacteria	2|Bacteria	C	4Fe-4S ferredoxin iron-sulfur binding domain protein	-	-	1.8.7.3,1.8.98.4,1.8.98.5,1.8.98.6	ko:K03388	ko00680,ko01100,ko01120,ko01200,map00680,map01100,map01120,map01200	M00356,M00357,M00563,M00567	R04540,R11928,R11931,R11943,R11944	RC00011	ko00000,ko00001,ko00002,ko01000	-	-	-	Fer4,Fer4_20,Fer4_4,Fer4_7,NAD_binding_8,Pyr_redox_2
NODE_2841_length_10728_cov_9.154408_8	1168289.AJKI01000042_gene3733	2.54e-242	750	28I1Q@1|root,2Z869@2|Bacteria,4NH2E@976|Bacteroidetes,2G1ZT@200643|Bacteroidia,3XIMW@558415|Marinilabiliaceae	976|Bacteroidetes	-	-	-	-	-	-	-	-	-	-	-	-	-	-	-
NODE_3150_length_8006_cov_10.170545_3	1265505.ATUG01000001_gene3026	0	1798	COG0493@1|root,COG1148@1|root,COG0493@2|Bacteria,COG1148@2|Bacteria,1MU2H@1224|Proteobacteria,42M6X@68525|delta/epsilon subdivisions,2X6YD@28221|Deltaproteobacteria	28221|Deltaproteobacteria	C	Pyridine nucleotide-disulphide oxidoreductase	-	-	-	-	-	-	-	-	-	-	-	-	Fer4,Fer4_20,Pyr_redox_2
NODE_6827_length_7904_cov_13.966110_1	1304872.JAGC01000009_gene749	1.72e-40	173	COG4842@1|root,COG4842@2|Bacteria	2|Bacteria	S	protein secretion by the type VII secretion system	-	-	-	-	-	-	-	-	-	-	-	-	WXG100
NODE_6977_length_6880_cov_6.348132_2	1408473.JHXO01000010_gene3664	9.19e-148	494	COG0642@1|root,COG0745@1|root,COG3292@1|root,COG0745@2|Bacteria,COG2205@2|Bacteria,COG3292@2|Bacteria,4NDXU@976|Bacteroidetes,2FM2N@200643|Bacteroidia	976|Bacteroidetes	T	ATPase histidine kinase DNA gyrase B HSP90 domain protein	-	-	-	-	-	-	-	-	-	-	-	-	HATPase_c,HTH_18,HisKA,Reg_prop,Response_reg,Y_Y_Y
NODE_16118_length_5239_cov_4.408179_2	366602.Caul_2946	4.71e-96	340	COG4992@1|root,COG5322@1|root,COG4992@2|Bacteria,COG5322@2|Bacteria,1R6U9@1224|Proteobacteria,2TUDK@28211|Alphaproteobacteria	28211|Alphaproteobacteria	E	Belongs to the class-III pyridoxal-phosphate-dependent aminotransferase family	MA20_16020	-	2.6.1.13	ko:K00819	ko00330,ko01100,ko01110,ko01130,map00330,map01100,map01110,map01130	-	R00667	RC00006,RC00062	ko00000,ko00001,ko01000,ko01007	-	-	-	Aminotran_3
NODE_1190_length_14884_cov_4.577247_4	1408473.JHXO01000004_gene166	7.76e-217	682	COG2911@1|root,COG2911@2|Bacteria,4NF7F@976|Bacteroidetes,2FNBJ@200643|Bacteroidia	976|Bacteroidetes	S	Psort location OuterMembrane, score 9.49	-	-	-	-	-	-	-	-	-	-	-	-	TamB
NODE_1502_length_10677_cov_5.139992_2	983544.Lacal_2589	0	1045	COG2911@1|root,COG2911@2|Bacteria,4NF7F@976|Bacteroidetes,1HWKQ@117743|Flavobacteriia	976|Bacteroidetes	S	PFAM Family of	-	-	-	-	-	-	-	-	-	-	-	-	TamB
NODE_2090_length_13559_cov_8.389070_2	385682.AFSL01000100_gene21	0	2105	COG0086@1|root,COG0086@2|Bacteria,4NEMW@976|Bacteroidetes,2FMWR@200643|Bacteroidia,3XJJC@558415|Marinilabiliaceae	976|Bacteroidetes	K	RNA polymerase I subunit A N-terminus	rpoC	GO:0000428,GO:0005575,GO:0005622,GO:0005623,GO:0030880,GO:0032991,GO:0044424,GO:0044464,GO:0061695,GO:1902494,GO:1990234	2.7.7.6	ko:K03046	ko00230,ko00240,ko01100,ko03020,map00230,map00240,map01100,map03020	M00183	R00435,R00441,R00442,R00443	RC02795	br01611,ko00000,ko00001,ko00002,ko01000,ko03021,ko03400	-	-	-	RNA_pol_Rpb1_1,RNA_pol_Rpb1_2,RNA_pol_Rpb1_3,RNA_pol_Rpb1_4,RNA_pol_Rpb1_5
NODE_13081_length_4633_cov_4.317169_2	313598.MED152_11814	0	2088	COG0587@1|root,COG0587@2|Bacteria,4NFA0@976|Bacteroidetes,1HXPM@117743|Flavobacteriia,3VV4T@52959|Polaribacter	976|Bacteroidetes	L	DNA polymerase alpha chain like domain	dnaE	-	2.7.7.7	ko:K02337	ko00230,ko00240,ko01100,ko03030,ko03430,ko03440,map00230,map00240,map01100,map03030,map03430,map03440	M00260	R00375,R00376,R00377,R00378	RC02795	ko00000,ko00001,ko00002,ko01000,ko03032,ko03400	-	-	-	DNA_pol3_alpha,HHH_6,PHP,RNase_T,tRNA_anti-codon
NODE_6682_length_6035_cov_4.738462_2	1168289.AJKI01000021_gene1708	0	2093	COG0086@1|root,COG0086@2|Bacteria,4NEMW@976|Bacteroidetes,2FMWR@200643|Bacteroidia,3XJJC@558415|Marinilabiliaceae	976|Bacteroidetes	K	RNA polymerase I subunit A N-terminus	rpoC	GO:0000428,GO:0005575,GO:0005622,GO:0005623,GO:0030880,GO:0032991,GO:0044424,GO:0044464,GO:0061695,GO:1902494,GO:1990234	2.7.7.6	ko:K03046	ko00230,ko00240,ko01100,ko03020,map00230,map00240,map01100,map03020	M00183	R00435,R00441,R00442,R00443	RC02795	br01611,ko00000,ko00001,ko00002,ko01000,ko03021,ko03400	-	-	-	RNA_pol_Rpb1_1,RNA_pol_Rpb1_2,RNA_pol_Rpb1_3,RNA_pol_Rpb1_4,RNA_pol_Rpb1_5
NODE_23158_length_4400_cov_12.327043_1	983545.Glaag_1664	7.06e-284	855	COG0553@1|root,COG0553@2|Bacteria,1MV6M@1224|Proteobacteria,1RQ34@1236|Gammaproteobacteria,466BB@72275|Alteromonadaceae	1236|Gammaproteobacteria	L	SNF2 family N-terminal domain	-	-	-	-	-	-	-	-	-	-	-	-	Helicase_C,SNF2_N,SWIM
NODE_22686_length_4447_cov_6.438980_1	439235.Dalk_0092	2.63e-306	912	COG1413@1|root,COG2199@1|root,COG3899@1|root,COG1413@2|Bacteria,COG2199@2|Bacteria,COG3899@2|Bacteria	2|Bacteria	T	PFAM Protein kinase domain	cpeY	-	2.7.11.1,2.7.7.65	ko:K05385,ko:K12132,ko:K13590	ko00196,ko01100,ko04112,map00196,map01100,map04112	-	-	-	ko00000,ko00001,ko00194,ko01000,ko01001	-	-	-	AAA_16,EAL,GGDEF,Trans_reg_C
NODE_1072_length_16738_cov_8.208056_8	926549.KI421517_gene1255	1.42e-38	166	COG1404@1|root,COG3209@1|root,COG4886@1|root,COG1404@2|Bacteria,COG3209@2|Bacteria,COG4886@2|Bacteria	2|Bacteria	S	regulation of response to stimulus	-	-	-	ko:K20276	ko02024,map02024	-	-	-	ko00000,ko00001	-	-	-	DUF4397
NODE_185_length_34552_cov_18.784097_16	1038922.PflQ2_4872	2.07e-55	221	COG3209@1|root,COG3209@2|Bacteria,1MVV1@1224|Proteobacteria,1SKYM@1236|Gammaproteobacteria	1236|Gammaproteobacteria	M	COG3209 Rhs family protein	-	-	-	-	-	-	-	-	-	-	-	-	Pertussis_S1,RHS,RHS_repeat,Tox-HNH-EHHH
NODE_1565_length_15344_cov_16.543332_5	1047013.AQSP01000087_gene1645	0	2279	COG0085@1|root,COG0085@2|Bacteria,2NNM9@2323|unclassified Bacteria	2|Bacteria	K	DNA-dependent RNA polymerase catalyzes the transcription of DNA into RNA using the four ribonucleoside triphosphates as substrates	rpoB	GO:0000428,GO:0003674,GO:0003824,GO:0003899,GO:0005575,GO:0005622,GO:0005623,GO:0005737,GO:0005829,GO:0006139,GO:0006351,GO:0006725,GO:0006807,GO:0008150,GO:0008152,GO:0009058,GO:0009059,GO:0009987,GO:0010467,GO:0016070,GO:0016740,GO:0016772,GO:0016779,GO:0018130,GO:0019438,GO:0030880,GO:0032774,GO:0032991,GO:0034062,GO:0034641,GO:0034645,GO:0034654,GO:0043170,GO:0044237,GO:0044238,GO:0044249,GO:…	2.7.7.6	ko:K03043,ko:K13797	ko00230,ko00240,ko01100,ko03020,map00230,map00240,map01100,map03020	M00183	R00435,R00441,R00442,R00443	RC02795	br01611,ko00000,ko00001,ko00002,ko01000,ko03021,ko03400	-	-	-	RNA_pol_Rpb2_1,RNA_pol_Rpb2_2,RNA_pol_Rpb2_3,RNA_pol_Rpb2_45,RNA_pol_Rpb2_6,RNA_pol_Rpb2_7
NODE_3853_length_8550_cov_4.601413_4	1408433.JHXV01000007_gene2907	0	2090	COG0086@1|root,COG0086@2|Bacteria,4NEMW@976|Bacteroidetes,1HYVS@117743|Flavobacteriia,2PACC@246874|Cryomorphaceae	976|Bacteroidetes	K	DNA-dependent RNA polymerase catalyzes the transcription of DNA into RNA using the four ribonucleoside triphosphates as substrates	rpoC	GO:0000428,GO:0005575,GO:0005622,GO:0005623,GO:0030880,GO:0032991,GO:0044424,GO:0044464,GO:0061695,GO:1902494,GO:1990234	2.7.7.6	ko:K03046	ko00230,ko00240,ko01100,ko03020,map00230,map00240,map01100,map03020	M00183	R00435,R00441,R00442,R00443	RC02795	br01611,ko00000,ko00001,ko00002,ko01000,ko03021,ko03400	-	-	-	RNA_pol_Rpb1_1,RNA_pol_Rpb1_2,RNA_pol_Rpb1_3,RNA_pol_Rpb1_4,RNA_pol_Rpb1_5
NODE_2087_length_9431_cov_4.997547_7	1121101.HMPREF1532_01007	2.92e-143	483	COG0745@1|root,COG2207@1|root,COG3292@1|root,COG5002@1|root,COG0745@2|Bacteria,COG2207@2|Bacteria,COG3292@2|Bacteria,COG5002@2|Bacteria,4P0IA@976|Bacteroidetes,2FWSR@200643|Bacteroidia,4ANR8@815|Bacteroidaceae	976|Bacteroidetes	T	Psort location CytoplasmicMembrane, score	-	-	-	-	-	-	-	-	-	-	-	-	HATPase_c,HTH_18,HisKA,Reg_prop,Response_reg,Y_Y_Y
NODE_914_length_17979_cov_5.591497_6	391596.PBAL39_11822	6.01e-28	132	COG0642@1|root,COG0745@1|root,COG2203@1|root,COG5278@1|root,COG0745@2|Bacteria,COG2203@2|Bacteria,COG2205@2|Bacteria,COG5278@2|Bacteria,4NFBM@976|Bacteroidetes,1INN9@117747|Sphingobacteriia	976|Bacteroidetes	T	Histidine kinase	-	-	-	-	-	-	-	-	-	-	-	-	CHASE3,GAF_2,HAMP,HATPase_c,HisKA,Response_reg
NODE_1751_length_12352_cov_11.865089_6	237368.SCABRO_01048	0	1138	COG1924@1|root,COG3580@1|root,COG3581@1|root,COG1924@2|Bacteria,COG3580@2|Bacteria,COG3581@2|Bacteria,2J293@203682|Planctomycetes	203682|Planctomycetes	I	CoA enzyme activase uncharacterised domain (DUF2229)	-	-	-	-	-	-	-	-	-	-	-	-	BcrAD_BadFG,DUF2229
NODE_2108_length_12313_cov_8.718796_5	742722.HMPREF9463_00989	7.71e-81	302	COG1924@1|root,COG3580@1|root,COG3581@1|root,COG1924@2|Bacteria,COG3580@2|Bacteria,COG3581@2|Bacteria,2I1VH@201174|Actinobacteria,4CUMY@84998|Coriobacteriia	84998|Coriobacteriia	I	CoA enzyme activase uncharacterised domain (DUF2229)	-	-	-	-	-	-	-	-	-	-	-	-	BcrAD_BadFG,DUF2229,HGD-D
NODE_539_length_23890_cov_9.063562_10	1313421.JHBV01000033_gene2431	1.34e-189	606	2E09V@1|root,32VXB@2|Bacteria,4NY12@976|Bacteroidetes,1J03H@117747|Sphingobacteriia	976|Bacteroidetes	-	-	-	-	-	-	-	-	-	-	-	-	-	-	-
NODE_12902_length_4947_cov_7.221382_1	247490.KSU1_B0663	0	1296	COG1924@1|root,COG3580@1|root,COG3581@1|root,COG1924@2|Bacteria,COG3580@2|Bacteria,COG3581@2|Bacteria,2J293@203682|Planctomycetes	203682|Planctomycetes	I	CoA enzyme activase uncharacterised domain (DUF2229)	-	-	-	-	-	-	-	-	-	-	-	-	BcrAD_BadFG,DUF2229
NODE_175_length_20249_cov_12.392097_26	945713.IALB_0906	0	2354	COG0086@1|root,COG0086@2|Bacteria	2|Bacteria	K	DNA-directed 5'-3' RNA polymerase activity	rpoC	GO:0000428,GO:0005575,GO:0005622,GO:0005623,GO:0030880,GO:0032991,GO:0044424,GO:0044464,GO:0061695,GO:1902494,GO:1990234	2.7.7.6	ko:K03046	ko00230,ko00240,ko01100,ko03020,map00230,map00240,map01100,map03020	M00183	R00435,R00441,R00442,R00443	RC02795	br01611,ko00000,ko00001,ko00002,ko01000,ko03021,ko03400	-	-	-	RNA_pol_Rpb1_1,RNA_pol_Rpb1_2,RNA_pol_Rpb1_3,RNA_pol_Rpb1_4,RNA_pol_Rpb1_5
NODE_5831_length_7477_cov_9.230127_3	929704.Myrod_2080	0	1261	COG0587@1|root,COG0587@2|Bacteria,4NFA0@976|Bacteroidetes,1HXPM@117743|Flavobacteriia,47HT7@76831|Myroides	976|Bacteroidetes	L	DNA polymerase alpha chain like domain	dnaE	-	2.7.7.7	ko:K02337	ko00230,ko00240,ko01100,ko03030,ko03430,ko03440,map00230,map00240,map01100,map03030,map03430,map03440	M00260	R00375,R00376,R00377,R00378	RC02795	ko00000,ko00001,ko00002,ko01000,ko03032,ko03400	-	-	-	DNA_pol3_alpha,HHH_6,PHP,RNase_T,tRNA_anti-codon
NODE_7614_length_5620_cov_17.442408_1	293826.Amet_1127	1.06e-223	694	COG1924@1|root,COG3580@1|root,COG3581@1|root,COG1924@2|Bacteria,COG3580@2|Bacteria,COG3581@2|Bacteria,1TPU5@1239|Firmicutes,2481F@186801|Clostridia,36G1J@31979|Clostridiaceae	186801|Clostridia	I	BadF/BadG/BcrA/BcrD ATPase family	-	-	-	-	-	-	-	-	-	-	-	-	BcrAD_BadFG,DUF2229
NODE_2793_length_10802_cov_10.148041_1	10090.ENSMUSP00000032510	2.03e-106	379	COG2373@1|root,KOG1366@2759|Eukaryota,38DGN@33154|Opisthokonta,3BCF2@33208|Metazoa,3CTZZ@33213|Bilateria,480CR@7711|Chordata,48V4X@7742|Vertebrata,3JCUB@40674|Mammalia,35PKT@314146|Euarchontoglires,4Q78N@9989|Rodentia	33208|Metazoa	O	brain-derived neurotrophic factor binding	A2M	GO:0000003,GO:0001868,GO:0001869,GO:0002020,GO:0002673,GO:0002682,GO:0002683,GO:0002697,GO:0002698,GO:0002920,GO:0002921,GO:0003674,GO:0004857,GO:0004866,GO:0004867,GO:0005102,GO:0005488,GO:0005515,GO:0005575,GO:0005576,GO:0005615,GO:0007275,GO:0007565,GO:0007566,GO:0008150,GO:0009892,GO:0009987,GO:0010466,GO:0010468,GO:0010605,GO:0010629,GO:0010951,GO:0010955,GO:0019222,GO:0019838,GO:0019899,GO:…	-	ko:K03910	ko04610,map04610	-	-	-	ko00000,ko00001,ko04131,ko04147	-	-	-	A2M,A2M_N,A2M_N_2,A2M_comp,A2M_recep,Thiol-ester_cl
NODE_19502_length_4782_cov_10.091178_1	697282.Mettu_2355	0	1003	28HYC@1|root,2Z83T@2|Bacteria,1QEBM@1224|Proteobacteria,1RRCK@1236|Gammaproteobacteria,1XDJX@135618|Methylococcales	135618|Methylococcales	-	-	-	-	-	-	-	-	-	-	-	-	-	-	-
NODE_5196_length_7917_cov_4.598703_5	1305737.JAFX01000001_gene3252	0	1291	COG0587@1|root,COG0587@2|Bacteria,4NFA0@976|Bacteroidetes,47K9H@768503|Cytophagia	976|Bacteroidetes	L	DNA-directed DNA polymerase	dnaE	-	2.7.7.7	ko:K02337	ko00230,ko00240,ko01100,ko03030,ko03430,ko03440,map00230,map00240,map01100,map03030,map03430,map03440	M00260	R00375,R00376,R00377,R00378	RC02795	ko00000,ko00001,ko00002,ko01000,ko03032,ko03400	-	-	-	DNA_pol3_alpha,HHH_6,PHP,RNase_T,tRNA_anti-codon
NODE_4067_length_7285_cov_5.243015_3	709991.Odosp_0296	0	1572	COG0058@1|root,COG0297@1|root,COG0058@2|Bacteria,COG0297@2|Bacteria,4NGR1@976|Bacteroidetes,2FNN5@200643|Bacteroidia,22WPC@171551|Porphyromonadaceae	976|Bacteroidetes	G	alpha-glucan phosphorylase	glgP	-	2.4.1.1,2.4.1.11,2.4.1.8	ko:K00688,ko:K00691,ko:K16153	ko00500,ko01100,ko01110,ko02026,ko04217,ko04910,ko04922,ko04931,map00500,map01100,map01110,map02026,map04217,map04910,map04922,map04931	-	R00292,R01555,R02111	RC00005,RC00049	ko00000,ko00001,ko01000,ko01003	-	GH65,GT3,GT35	-	DUF3417,Glycogen_syn,Phosphorylase
NODE_427_length_25172_cov_46.056018_15	479434.Sthe_2830	0	1191	COG0553@1|root,COG0553@2|Bacteria,2G8KR@200795|Chloroflexi,27Y5Q@189775|Thermomicrobia	189775|Thermomicrobia	L	PLD-like domain	-	-	-	-	-	-	-	-	-	-	-	-	Helicase_C,PLDc_2,SNF2_N
NODE_1286_length_15334_cov_8.468879_8	765913.ThidrDRAFT_1731	0	2136	COG0086@1|root,COG0086@2|Bacteria,1MU3M@1224|Proteobacteria,1RPYH@1236|Gammaproteobacteria,1WVVI@135613|Chromatiales	135613|Chromatiales	K	DNA-dependent RNA polymerase catalyzes the transcription of DNA into RNA using the four ribonucleoside triphosphates as substrates	rpoC	-	2.7.7.6	ko:K03046	ko00230,ko00240,ko01100,ko03020,map00230,map00240,map01100,map03020	M00183	R00435,R00441,R00442,R00443	RC02795	br01611,ko00000,ko00001,ko00002,ko01000,ko03021,ko03400	-	-	-	RNA_pol_Rpb1_1,RNA_pol_Rpb1_2,RNA_pol_Rpb1_3,RNA_pol_Rpb1_4,RNA_pol_Rpb1_5
NODE_11678_length_4847_cov_4.607888_1	1250005.PHEL85_0702	0	1755	COG0438@1|root,COG4632@1|root,COG0438@2|Bacteria,COG4632@2|Bacteria,4NR1M@976|Bacteroidetes,1I6BU@117743|Flavobacteriia	976|Bacteroidetes	G	Phosphodiester glycosidase	-	-	-	-	-	-	-	-	-	-	-	-	Metallophos,NAGPA,fn3
NODE_1542_length_15420_cov_11.688838_4	1442599.JAAN01000032_gene1567	0	1991	COG0086@1|root,COG0086@2|Bacteria,1MU3M@1224|Proteobacteria,1RPYH@1236|Gammaproteobacteria,1X3IQ@135614|Xanthomonadales	135614|Xanthomonadales	K	DNA-dependent RNA polymerase catalyzes the transcription of DNA into RNA using the four ribonucleoside triphosphates as substrates	rpoC	GO:0000428,GO:0005575,GO:0005622,GO:0005623,GO:0030880,GO:0032991,GO:0044424,GO:0044464,GO:0061695,GO:1902494,GO:1990234	2.7.7.6	ko:K03046	ko00230,ko00240,ko01100,ko03020,map00230,map00240,map01100,map03020	M00183	R00435,R00441,R00442,R00443	RC02795	br01611,ko00000,ko00001,ko00002,ko01000,ko03021,ko03400	-	-	-	RNA_pol_Rpb1_1,RNA_pol_Rpb1_2,RNA_pol_Rpb1_3,RNA_pol_Rpb1_4,RNA_pol_Rpb1_5
NODE_830_length_13194_cov_9.566938_8	187272.Mlg_0452	0	2156	COG0086@1|root,COG0086@2|Bacteria,1MU3M@1224|Proteobacteria,1RPYH@1236|Gammaproteobacteria,1WVVI@135613|Chromatiales	135613|Chromatiales	K	DNA-dependent RNA polymerase catalyzes the transcription of DNA into RNA using the four ribonucleoside triphosphates as substrates	rpoC	-	2.7.7.6	ko:K03046	ko00230,ko00240,ko01100,ko03020,map00230,map00240,map01100,map03020	M00183	R00435,R00441,R00442,R00443	RC02795	br01611,ko00000,ko00001,ko00002,ko01000,ko03021,ko03400	-	-	-	RNA_pol_Rpb1_1,RNA_pol_Rpb1_2,RNA_pol_Rpb1_3,RNA_pol_Rpb1_4,RNA_pol_Rpb1_5
NODE_749_length_16413_cov_22.393752_1	387631.Asulf_00521	4.73e-21	109	COG3979@1|root,COG5306@1|root,arCOG02420@1|root,arCOG03511@1|root,arCOG03553@1|root,arCOG09173@1|root,arCOG02420@2157|Archaea,arCOG03508@2157|Archaea,arCOG03511@2157|Archaea,arCOG03553@2157|Archaea,arCOG07581@2157|Archaea,arCOG09173@2157|Archaea	2157|Archaea	C	PKD domain containing protein	-	-	-	-	-	-	-	-	-	-	-	-	CARDB,DUF2341,PKD,Pilin_N,S_layer_C
NODE_6943_length_5942_cov_5.086122_1	709991.Odosp_0296	0	1384	COG0058@1|root,COG0297@1|root,COG0058@2|Bacteria,COG0297@2|Bacteria,4NGR1@976|Bacteroidetes,2FNN5@200643|Bacteroidia,22WPC@171551|Porphyromonadaceae	976|Bacteroidetes	G	alpha-glucan phosphorylase	glgP	-	2.4.1.1,2.4.1.11,2.4.1.8	ko:K00688,ko:K00691,ko:K16153	ko00500,ko01100,ko01110,ko02026,ko04217,ko04910,ko04922,ko04931,map00500,map01100,map01110,map02026,map04217,map04910,map04922,map04931	-	R00292,R01555,R02111	RC00005,RC00049	ko00000,ko00001,ko01000,ko01003	-	GH65,GT3,GT35	-	DUF3417,Glycogen_syn,Phosphorylase
NODE_4330_length_8641_cov_38.409620_2	196367.JNFG01000009_gene6303	3.18e-106	376	COG0470@1|root,COG0470@2|Bacteria,1PWZ9@1224|Proteobacteria,2W47P@28216|Betaproteobacteria,1K7V0@119060|Burkholderiaceae	28216|Betaproteobacteria	L	DNA polymerase III	-	-	-	-	-	-	-	-	-	-	-	-	-
NODE_814_length_13327_cov_5.382911_6	1121904.ARBP01000014_gene86	3.37e-36	152	2C5U1@1|root,2Z80K@2|Bacteria,4NG4G@976|Bacteroidetes,47RZF@768503|Cytophagia	976|Bacteroidetes	-	-	-	-	-	-	-	-	-	-	-	-	-	-	DUF748
NODE_14530_length_4653_cov_18.789256_1	1116472.MGMO_76c00010	0	1043	28HYC@1|root,2Z83T@2|Bacteria,1QEBM@1224|Proteobacteria,1RRCK@1236|Gammaproteobacteria,1XDJX@135618|Methylococcales	135618|Methylococcales	-	-	-	-	-	-	-	-	-	-	-	-	-	-	-
NODE_1565_length_15344_cov_16.543332_4	1047013.AQSP01000087_gene1646	0	2278	COG0086@1|root,COG0086@2|Bacteria,2NNPR@2323|unclassified Bacteria	2|Bacteria	K	DNA-dependent RNA polymerase catalyzes the transcription of DNA into RNA using the four ribonucleoside triphosphates as substrates	rpoC	GO:0000428,GO:0003674,GO:0003824,GO:0003899,GO:0005575,GO:0005622,GO:0005623,GO:0005737,GO:0005829,GO:0006139,GO:0006351,GO:0006725,GO:0006807,GO:0008150,GO:0008152,GO:0009058,GO:0009059,GO:0009987,GO:0010467,GO:0016070,GO:0016740,GO:0016772,GO:0016779,GO:0018130,GO:0019438,GO:0030880,GO:0032774,GO:0032991,GO:0034062,GO:0034641,GO:0034645,GO:0034654,GO:0043170,GO:0044237,GO:0044238,GO:0044249,GO:…	2.7.7.6	ko:K03046,ko:K13797	ko00230,ko00240,ko01100,ko03020,map00230,map00240,map01100,map03020	M00183	R00435,R00441,R00442,R00443	RC02795	br01611,ko00000,ko00001,ko00002,ko01000,ko03021,ko03400	-	-	-	RNA_pol_Rpb1_1,RNA_pol_Rpb1_2,RNA_pol_Rpb1_3,RNA_pol_Rpb1_4,RNA_pol_Rpb1_5
NODE_4876_length_7684_cov_8.118364_1	926569.ANT_25290	0	1461	COG0653@1|root,COG0653@2|Bacteria,2G603@200795|Chloroflexi	200795|Chloroflexi	U	Part of the Sec protein translocase complex. Interacts with the SecYEG preprotein conducting channel. Has a central role in coupling the hydrolysis of ATP to the transfer of proteins into and across the cell membrane, serving as an ATP-driven molecular motor driving the stepwise translocation of polypeptide chains across the membrane	secA	GO:0000166,GO:0003674,GO:0003824,GO:0005215,GO:0005488,GO:0005524,GO:0005575,GO:0005622,GO:0005623,GO:0005737,GO:0005829,GO:0005886,GO:0005887,GO:0006810,GO:0008104,GO:0008144,GO:0008150,GO:0008320,GO:0008565,GO:0015031,GO:0015399,GO:0015405,GO:0015440,GO:0015450,GO:0015462,GO:0015833,GO:0016020,GO:0016021,GO:0016462,GO:0016787,GO:0016817,GO:0016818,GO:0016887,GO:0017076,GO:0017111,GO:0022804,GO:…	-	ko:K03070	ko02024,ko03060,ko03070,map02024,map03060,map03070	M00335	-	-	ko00000,ko00001,ko00002,ko02044	3.A.5.1,3.A.5.10,3.A.5.2,3.A.5.4	-	-	SEC-C,SecA_DEAD,SecA_PP_bind,SecA_SW
NODE_8852_length_6170_cov_7.604906_1	1223410.KN050846_gene2266	3.78e-16	93.2	COG0729@1|root,COG5295@1|root,COG0729@2|Bacteria,COG5295@2|Bacteria,4NN7P@976|Bacteroidetes,1I1GH@117743|Flavobacteriia	976|Bacteroidetes	UW	Head domain of trimeric autotransporter adhesin	-	-	-	ko:K21449	-	-	-	-	ko00000,ko02000	1.B.40.2	-	-	YadA_head
NODE_3324_length_9888_cov_5.450931_1	909663.KI867149_gene3455	2.79e-292	873	COG0574@1|root,COG3848@1|root,COG0574@2|Bacteria,COG3848@2|Bacteria,1MXBU@1224|Proteobacteria,42M59@68525|delta/epsilon subdivisions,2WIUK@28221|Deltaproteobacteria,2MR7V@213462|Syntrophobacterales	28221|Deltaproteobacteria	G	Pyruvate phosphate dikinase, PEP/pyruvate binding domain	-	-	2.7.9.1	ko:K01006	ko00620,ko00710,ko00720,ko01100,ko01120,ko01200,map00620,map00710,map00720,map01100,map01120,map01200	M00169,M00171,M00172,M00173	R00206	RC00002,RC00015	ko00000,ko00001,ko00002,ko01000	-	-	-	PEP-utilizers,PPDK_N
NODE_2088_length_12365_cov_12.455565_3	1242864.D187_008398	0	1716	COG0085@1|root,COG0085@2|Bacteria,1MUC4@1224|Proteobacteria,43DMZ@68525|delta/epsilon subdivisions,2WIW5@28221|Deltaproteobacteria,2YUEA@29|Myxococcales	28221|Deltaproteobacteria	K	DNA-dependent RNA polymerase catalyzes the transcription of DNA into RNA using the four ribonucleoside triphosphates as substrates	rpoB	GO:0000428,GO:0005575,GO:0005622,GO:0005623,GO:0030880,GO:0032991,GO:0044424,GO:0044464,GO:0061695,GO:1902494,GO:1990234	2.7.7.6	ko:K03043	ko00230,ko00240,ko01100,ko03020,map00230,map00240,map01100,map03020	M00183	R00435,R00441,R00442,R00443	RC02795	br01611,ko00000,ko00001,ko00002,ko01000,ko03021,ko03400	-	-	-	RNA_pol_Rpb2_1,RNA_pol_Rpb2_2,RNA_pol_Rpb2_3,RNA_pol_Rpb2_45,RNA_pol_Rpb2_6,RNA_pol_Rpb2_7
NODE_1341_length_11146_cov_13.684880_6	1242864.D187_008398	0	1651	COG0085@1|root,COG0085@2|Bacteria,1MUC4@1224|Proteobacteria,43DMZ@68525|delta/epsilon subdivisions,2WIW5@28221|Deltaproteobacteria,2YUEA@29|Myxococcales	28221|Deltaproteobacteria	K	DNA-dependent RNA polymerase catalyzes the transcription of DNA into RNA using the four ribonucleoside triphosphates as substrates	rpoB	GO:0000428,GO:0005575,GO:0005622,GO:0005623,GO:0030880,GO:0032991,GO:0044424,GO:0044464,GO:0061695,GO:1902494,GO:1990234	2.7.7.6	ko:K03043	ko00230,ko00240,ko01100,ko03020,map00230,map00240,map01100,map03020	M00183	R00435,R00441,R00442,R00443	RC02795	br01611,ko00000,ko00001,ko00002,ko01000,ko03021,ko03400	-	-	-	RNA_pol_Rpb2_1,RNA_pol_Rpb2_2,RNA_pol_Rpb2_3,RNA_pol_Rpb2_45,RNA_pol_Rpb2_6,RNA_pol_Rpb2_7
NODE_925_length_17874_cov_11.138672_10	743721.Psesu_0766	5.98e-52	209	COG0642@1|root,COG3292@1|root,COG2205@2|Bacteria,COG3292@2|Bacteria,1NRP8@1224|Proteobacteria,1SKTW@1236|Gammaproteobacteria,1X4Y5@135614|Xanthomonadales	135614|Xanthomonadales	T	Histidine kinase	-	-	-	-	-	-	-	-	-	-	-	-	HATPase_c,HisKA,Reg_prop,Response_reg,Y_Y_Y
NODE_3398_length_9803_cov_7.363459_4	1313421.JHBV01000009_gene4138	4.44e-39	168	COG3291@1|root,COG3291@2|Bacteria,4PMDA@976|Bacteroidetes	976|Bacteroidetes	O	domain protein	-	-	-	-	-	-	-	-	-	-	-	-	-
NODE_2759_length_9351_cov_12.968696_2	1121405.dsmv_3645	0	2113	COG0085@1|root,COG0085@2|Bacteria,1MUC4@1224|Proteobacteria,43DMZ@68525|delta/epsilon subdivisions,2WIW5@28221|Deltaproteobacteria,2MI5C@213118|Desulfobacterales	28221|Deltaproteobacteria	K	DNA-dependent RNA polymerase catalyzes the transcription of DNA into RNA using the four ribonucleoside triphosphates as substrates	rpoB	GO:0000428,GO:0005575,GO:0005622,GO:0005623,GO:0030880,GO:0032991,GO:0044424,GO:0044464,GO:0061695,GO:1902494,GO:1990234	2.7.7.6	ko:K03043	ko00230,ko00240,ko01100,ko03020,map00230,map00240,map01100,map03020	M00183	R00435,R00441,R00442,R00443	RC02795	br01611,ko00000,ko00001,ko00002,ko01000,ko03021,ko03400	-	-	-	RNA_pol_Rpb2_1,RNA_pol_Rpb2_2,RNA_pol_Rpb2_3,RNA_pol_Rpb2_45,RNA_pol_Rpb2_6,RNA_pol_Rpb2_7
NODE_6967_length_6534_cov_3.629572_3	925409.KI911562_gene541	7.26e-48	196	COG0642@1|root,COG0745@1|root,COG3292@1|root,COG0745@2|Bacteria,COG2205@2|Bacteria,COG3292@2|Bacteria,4NDXU@976|Bacteroidetes,1IR3V@117747|Sphingobacteriia	976|Bacteroidetes	T	Signal transduction histidine kinase, subgroup 1, dimerisation phosphoacceptor	-	-	-	-	-	-	-	-	-	-	-	-	HATPase_c,HTH_18,HisKA,Reg_prop,Response_reg,Y_Y_Y
NODE_459_length_15498_cov_29.471541_7	589865.DaAHT2_1459	0	1991	COG0085@1|root,COG0085@2|Bacteria,1MUC4@1224|Proteobacteria,43DMZ@68525|delta/epsilon subdivisions,2WIW5@28221|Deltaproteobacteria,2MI5C@213118|Desulfobacterales	28221|Deltaproteobacteria	K	DNA-dependent RNA polymerase catalyzes the transcription of DNA into RNA using the four ribonucleoside triphosphates as substrates	rpoB	GO:0000428,GO:0005575,GO:0005622,GO:0005623,GO:0030880,GO:0032991,GO:0044424,GO:0044464,GO:0061695,GO:1902494,GO:1990234	2.7.7.6	ko:K03043	ko00230,ko00240,ko01100,ko03020,map00230,map00240,map01100,map03020	M00183	R00435,R00441,R00442,R00443	RC02795	br01611,ko00000,ko00001,ko00002,ko01000,ko03021,ko03400	-	-	-	RNA_pol_Rpb2_1,RNA_pol_Rpb2_2,RNA_pol_Rpb2_3,RNA_pol_Rpb2_45,RNA_pol_Rpb2_6,RNA_pol_Rpb2_7
NODE_12886_length_4894_cov_20.091135_1	1049564.TevJSym_aa01930	0	1642	COG0841@1|root,COG0841@2|Bacteria,1MU48@1224|Proteobacteria,1RMBN@1236|Gammaproteobacteria	1236|Gammaproteobacteria	V	Belongs to the resistance-nodulation-cell division (RND) (TC 2.A.6) family	-	-	-	-	-	-	-	-	-	-	-	-	ACR_tran
NODE_4530_length_8464_cov_7.848615_2	1278307.KB906967_gene2564	1.64e-116	391	COG2356@1|root,COG2374@1|root,COG3291@1|root,COG4733@1|root,COG2356@2|Bacteria,COG2374@2|Bacteria,COG3291@2|Bacteria,COG4733@2|Bacteria,1R4W1@1224|Proteobacteria,1RPZG@1236|Gammaproteobacteria,2QJ69@267894|Psychromonadaceae	1236|Gammaproteobacteria	L	Endonuclease I	-	-	-	-	-	-	-	-	-	-	-	-	Endonuclease_1
NODE_4721_length_8290_cov_37.698239_3	667014.Thein_1788	5.45e-69	244	28WYN@1|root,30ZZ9@2|Bacteria,2GIDT@200940|Thermodesulfobacteria	200940|Thermodesulfobacteria	P	Doubled CXXCH motif (Paired_CXXCH_1)	-	-	-	-	-	-	-	-	-	-	-	-	Paired_CXXCH_1
NODE_3445_length_7727_cov_10.905892_3	1121396.KB893100_gene4319	0	1346	COG0493@1|root,COG1148@1|root,COG0493@2|Bacteria,COG1148@2|Bacteria,1QUM4@1224|Proteobacteria,42MPP@68525|delta/epsilon subdivisions,2WJ3U@28221|Deltaproteobacteria,2MIA4@213118|Desulfobacterales	28221|Deltaproteobacteria	C	Pyridine nucleotide-disulphide oxidoreductase	-	-	1.8.7.3,1.8.98.4,1.8.98.5,1.8.98.6	ko:K03388	ko00680,ko01100,ko01120,ko01200,map00680,map01100,map01120,map01200	M00356,M00357,M00563,M00567	R04540,R11928,R11931,R11943,R11944	RC00011	ko00000,ko00001,ko00002,ko01000	-	-	-	Fer4,Fer4_20,Fer4_7,Pyr_redox_2
NODE_15682_length_5311_cov_8.946918_2	572477.Alvin_2370	0	1946	COG0085@1|root,COG0085@2|Bacteria,1MUC4@1224|Proteobacteria,1RMK0@1236|Gammaproteobacteria,1WX4P@135613|Chromatiales	135613|Chromatiales	K	DNA-dependent RNA polymerase catalyzes the transcription of DNA into RNA using the four ribonucleoside triphosphates as substrates	rpoB	-	2.7.7.6	ko:K03043	ko00230,ko00240,ko01100,ko03020,map00230,map00240,map01100,map03020	M00183	R00435,R00441,R00442,R00443	RC02795	br01611,ko00000,ko00001,ko00002,ko01000,ko03021,ko03400	-	-	-	RNA_pol_Rpb2_1,RNA_pol_Rpb2_2,RNA_pol_Rpb2_3,RNA_pol_Rpb2_45,RNA_pol_Rpb2_6,RNA_pol_Rpb2_7
NODE_550_length_15110_cov_5.629558_5	880073.Calab_1858	8.82e-308	905	COG1361@1|root,COG4447@1|root,COG4935@1|root,COG1361@2|Bacteria,COG4447@2|Bacteria,COG4935@2|Bacteria	2|Bacteria	O	Belongs to the peptidase S8 family	-	-	-	-	-	-	-	-	-	-	-	-	CHU_C,FlgD_ig,TM_helix
NODE_1542_length_15420_cov_11.688838_5	572477.Alvin_2370	0	1950	COG0085@1|root,COG0085@2|Bacteria,1MUC4@1224|Proteobacteria,1RMK0@1236|Gammaproteobacteria,1WX4P@135613|Chromatiales	135613|Chromatiales	K	DNA-dependent RNA polymerase catalyzes the transcription of DNA into RNA using the four ribonucleoside triphosphates as substrates	rpoB	-	2.7.7.6	ko:K03043	ko00230,ko00240,ko01100,ko03020,map00230,map00240,map01100,map03020	M00183	R00435,R00441,R00442,R00443	RC02795	br01611,ko00000,ko00001,ko00002,ko01000,ko03021,ko03400	-	-	-	RNA_pol_Rpb2_1,RNA_pol_Rpb2_2,RNA_pol_Rpb2_3,RNA_pol_Rpb2_45,RNA_pol_Rpb2_6,RNA_pol_Rpb2_7
NODE_13734_length_4767_cov_20.546053_2	1049564.TevJSym_bu00050	0	2271	COG0085@1|root,COG0085@2|Bacteria,1MUC4@1224|Proteobacteria,1RMK0@1236|Gammaproteobacteria,1J52Z@118884|unclassified Gammaproteobacteria	1236|Gammaproteobacteria	K	DNA-dependent RNA polymerase catalyzes the transcription of DNA into RNA using the four ribonucleoside triphosphates as substrates	rpoB	GO:0000428,GO:0003674,GO:0003824,GO:0003899,GO:0005575,GO:0005622,GO:0005623,GO:0005737,GO:0005829,GO:0006139,GO:0006351,GO:0006725,GO:0006807,GO:0008150,GO:0008152,GO:0009058,GO:0009059,GO:0009987,GO:0010467,GO:0016070,GO:0016740,GO:0016772,GO:0016779,GO:0018130,GO:0019438,GO:0030880,GO:0032774,GO:0032991,GO:0034062,GO:0034641,GO:0034645,GO:0034654,GO:0043170,GO:0044237,GO:0044238,GO:0044249,GO:…	2.7.7.6	ko:K03043	ko00230,ko00240,ko01100,ko03020,map00230,map00240,map01100,map03020	M00183	R00435,R00441,R00442,R00443	RC02795	br01611,ko00000,ko00001,ko00002,ko01000,ko03021,ko03400	-	-	-	RNA_pol_Rpb2_1,RNA_pol_Rpb2_2,RNA_pol_Rpb2_3,RNA_pol_Rpb2_45,RNA_pol_Rpb2_6,RNA_pol_Rpb2_7
NODE_25785_length_4181_cov_12.238730_2	398579.Spea_0466	1e-167	525	COG5001@1|root,COG5001@2|Bacteria,1MU2C@1224|Proteobacteria,1RM8A@1236|Gammaproteobacteria,2Q8P9@267890|Shewanellaceae	1236|Gammaproteobacteria	T	PFAM GGDEF domain containing protein	-	-	-	-	-	-	-	-	-	-	-	-	EAL,GGDEF,PAS_3,PAS_4,PAS_9,Response_reg
NODE_8223_length_7214_cov_15.499371_6	293826.Amet_1127	1.01e-226	701	COG1924@1|root,COG3580@1|root,COG3581@1|root,COG1924@2|Bacteria,COG3580@2|Bacteria,COG3581@2|Bacteria,1TPU5@1239|Firmicutes,2481F@186801|Clostridia,36G1J@31979|Clostridiaceae	186801|Clostridia	I	BadF/BadG/BcrA/BcrD ATPase family	-	-	-	-	-	-	-	-	-	-	-	-	BcrAD_BadFG,DUF2229
NODE_1706_length_13521_cov_8.635007_6	459349.CLOAM0984	3.07e-157	515	COG1361@1|root,COG1361@2|Bacteria,2NS3P@2323|unclassified Bacteria	2|Bacteria	M	Evidence 5 No homology to any previously reported sequences	-	-	-	-	-	-	-	-	-	-	-	-	CHU_C,FlgD_ig,Peptidase_C25,Peptidase_C25_C,Propeptide_C25
NODE_13112_length_4861_cov_143.870578_1	765911.Thivi_1205	3.37e-248	771	COG0784@1|root,COG0834@1|root,COG2198@1|root,COG4251@1|root,COG0784@2|Bacteria,COG0834@2|Bacteria,COG2198@2|Bacteria,COG4251@2|Bacteria,1NC9X@1224|Proteobacteria,1SVEC@1236|Gammaproteobacteria,1X2QI@135613|Chromatiales	135613|Chromatiales	T	Histidine Phosphotransfer domain	-	-	-	-	-	-	-	-	-	-	-	-	HATPase_c,HisKA,Hpt,PAS_3,Response_reg
NODE_1187_length_17315_cov_8.010603_17	991.IW20_10130	0.000126	55.8	COG5635@1|root,COG5635@2|Bacteria,4PHBT@976|Bacteroidetes,1ID8X@117743|Flavobacteriia,2NXRD@237|Flavobacterium	976|Bacteroidetes	T	Nacht domain	-	-	-	-	-	-	-	-	-	-	-	-	-
NODE_8697_length_7025_cov_13.009613_2	111781.Lepto7376_3328	6.55e-77	283	COG5000@1|root,COG5001@1|root,COG5000@2|Bacteria,COG5001@2|Bacteria,1GBTN@1117|Cyanobacteria,1HH41@1150|Oscillatoriales	2|Bacteria	T	Diguanylate cyclase phosphodiesterase with PAS PAC sensor(S)	-	-	2.7.7.65,2.7.7.7	ko:K02342,ko:K21021	ko00230,ko00240,ko01100,ko02025,ko03030,ko03430,ko03440,map00230,map00240,map01100,map02025,map03030,map03430,map03440	M00260	R00375,R00376,R00377,R00378	RC02795	ko00000,ko00001,ko00002,ko01000,ko03032,ko03400	-	-	-	CBS,DUF2222,EAL,GAF_2,GGDEF,HAMP,HATPase_c,HisKA_3,PAS,PAS_3,PAS_4,PAS_8,PAS_9,RNase_T,SpoIIE,dCache_1,sCache_3_2
NODE_3436_length_10864_cov_4.910538_5	1122182.KB903822_gene1230	5.68e-13	82.8	COG3291@1|root,COG3291@2|Bacteria,2GKNE@201174|Actinobacteria,4DGVA@85008|Micromonosporales	201174|Actinobacteria	S	Peptidase family M9 N-terminal	-	-	3.4.24.3	ko:K01387	-	-	-	-	ko00000,ko01000,ko01002,ko02042	-	-	-	PKD,PPC,Peptidase_M9,Peptidase_M9_N
NODE_459_length_15498_cov_29.471541_8	243231.GSU2862	0	1897	COG0086@1|root,COG0086@2|Bacteria,1MU3M@1224|Proteobacteria,42NAW@68525|delta/epsilon subdivisions,2WISU@28221|Deltaproteobacteria	28221|Deltaproteobacteria	K	DNA-dependent RNA polymerase catalyzes the transcription of DNA into RNA using the four ribonucleoside triphosphates as substrates	rpoC	-	2.7.7.6	ko:K03046	ko00230,ko00240,ko01100,ko03020,map00230,map00240,map01100,map03020	M00183	R00435,R00441,R00442,R00443	RC02795	br01611,ko00000,ko00001,ko00002,ko01000,ko03021,ko03400	-	-	-	RNA_pol_Rpb1_1,RNA_pol_Rpb1_2,RNA_pol_Rpb1_3,RNA_pol_Rpb1_4,RNA_pol_Rpb1_5
NODE_16607_length_4214_cov_10.173840_1	485915.Dret_0110	2.48e-51	202	COG2982@1|root,COG2982@2|Bacteria,1MUAN@1224|Proteobacteria,42P9Q@68525|delta/epsilon subdivisions,2WKH7@28221|Deltaproteobacteria,2MFA4@213115|Desulfovibrionales	28221|Deltaproteobacteria	M	AsmA-like C-terminal region	-	-	-	ko:K07290	-	-	-	-	ko00000	9.B.121	-	-	AsmA
NODE_16254_length_4656_cov_3.903499_1	742766.HMPREF9455_03302	9.53e-05	56.2	COG2911@1|root,COG2911@2|Bacteria,4NF7F@976|Bacteroidetes,2FNBJ@200643|Bacteroidia,22VVM@171551|Porphyromonadaceae	976|Bacteroidetes	S	TamB, inner membrane protein subunit of TAM complex	-	-	-	-	-	-	-	-	-	-	-	-	TamB
NODE_1362_length_14910_cov_5.542242_3	869213.JCM21142_237	8.36e-188	598	COG0745@1|root,COG3292@1|root,COG5002@1|root,COG0745@2|Bacteria,COG3292@2|Bacteria,COG5002@2|Bacteria,4P0IA@976|Bacteroidetes,47ND8@768503|Cytophagia	976|Bacteroidetes	T	Y_Y_Y domain	-	-	-	-	-	-	-	-	-	-	-	-	HATPase_c,HTH_18,HisKA,Reg_prop,Response_reg,Y_Y_Y
NODE_3774_length_8188_cov_11.424812_7	177437.HRM2_37620	0	1251	COG1643@1|root,COG1643@2|Bacteria,1MUEQ@1224|Proteobacteria,42MD4@68525|delta/epsilon subdivisions,2WJ7Z@28221|Deltaproteobacteria,2MIAK@213118|Desulfobacterales	28221|Deltaproteobacteria	L	TIGRFAM ATP-dependent helicase HrpA	hrpA	-	3.6.4.13	ko:K03578,ko:K03579	-	-	-	-	ko00000,ko01000	-	-	-	AAA_19,DEAD,DUF3418,HA2,Helicase_C,OB_NTP_bind
NODE_1742_length_14660_cov_15.253680_9	1117314.PCIT_18797	1.74e-102	353	COG1404@1|root,COG3291@1|root,COG4935@1|root,COG1404@2|Bacteria,COG3291@2|Bacteria,COG4935@2|Bacteria,1MU3S@1224|Proteobacteria,1RSP9@1236|Gammaproteobacteria,2Q10K@267888|Pseudoalteromonadaceae	1236|Gammaproteobacteria	O	Belongs to the peptidase S8 family	-	-	-	-	-	-	-	-	-	-	-	-	PKD,P_proprotein,Peptidase_S8
NODE_3185_length_8803_cov_7.673640_2	502025.Hoch_4297	0	1070	COG2132@1|root,COG2132@2|Bacteria,1MU0J@1224|Proteobacteria,42QJP@68525|delta/epsilon subdivisions,2WMET@28221|Deltaproteobacteria,2YVF6@29|Myxococcales	28221|Deltaproteobacteria	Q	PFAM multicopper oxidase type 2	ompC	-	1.16.3.3	ko:K22350	-	-	-	-	ko00000,ko01000	-	-	-	Cu-oxidase_2
NODE_4011_length_8381_cov_6.057170_5	1142394.PSMK_09400	1.41e-06	62	COG4447@1|root,COG4447@2|Bacteria,2J1J5@203682|Planctomycetes	203682|Planctomycetes	S	Sortilin, neurotensin receptor 3,	-	-	-	-	-	-	-	-	-	-	-	-	Sortilin-Vps10
NODE_1328_length_16398_cov_13.216545_11	521719.ATXQ01000004_gene1744	0	1606	COG0046@1|root,COG0047@1|root,COG0046@2|Bacteria,COG0047@2|Bacteria,1MYN4@1224|Proteobacteria,1RMRN@1236|Gammaproteobacteria,1YDI3@136841|Pseudomonas aeruginosa group	1236|Gammaproteobacteria	F	Phosphoribosylformylglycinamidine synthase involved in the purines biosynthetic pathway. Catalyzes the ATP-dependent conversion of formylglycinamide ribonucleotide (FGAR) and glutamine to yield formylglycinamidine ribonucleotide (FGAM) and glutamate	purL	GO:0000166,GO:0003674,GO:0003824,GO:0004642,GO:0005488,GO:0005524,GO:0005575,GO:0005622,GO:0005623,GO:0005737,GO:0005829,GO:0006082,GO:0006139,GO:0006163,GO:0006164,GO:0006188,GO:0006189,GO:0006520,GO:0006541,GO:0006725,GO:0006753,GO:0006793,GO:0006796,GO:0006807,GO:0008144,GO:0008150,GO:0008152,GO:0009058,GO:0009064,GO:0009117,GO:0009123,GO:0009124,GO:0009126,GO:0009127,GO:0009150,GO:0009152,GO:…	6.3.5.3	ko:K01952	ko00230,ko01100,ko01110,ko01130,map00230,map01100,map01110,map01130	M00048	R04463	RC00010,RC01160	ko00000,ko00001,ko00002,ko01000	-	-	iECH74115_1262.ECH74115_3792,iECO111_1330.ECO111_3283,iECSP_1301.ECSP_3501,iECs_1301.ECs3423,iG2583_1286.G2583_3088,iJN746.PP_1037,ic_1306.c3080	AIRS_C,GATase_5
NODE_1342_length_15025_cov_6.032933_3	1046627.BZARG_2900	2.79e-247	745	COG1404@1|root,COG1404@2|Bacteria,4PM4C@976|Bacteroidetes,1IJJ4@117743|Flavobacteriia	976|Bacteroidetes	O	Belongs to the peptidase S8 family	-	-	-	-	-	-	-	-	-	-	-	-	MAM,Peptidase_M43,Peptidase_S8,fn3
NODE_13124_length_5129_cov_76.728419_2	269796.Rru_A2521	1.48e-289	873	COG1061@1|root,COG1112@1|root,COG1061@2|Bacteria,COG1112@2|Bacteria,1MWMG@1224|Proteobacteria,2TSE1@28211|Alphaproteobacteria,2JU11@204441|Rhodospirillales	204441|Rhodospirillales	L	AAA domain	-	-	-	-	-	-	-	-	-	-	-	-	AAA_11,AAA_12,AAA_19,DUF3320,DUF4011
NODE_3899_length_7386_cov_9.729096_2	1454202.PPBDW_100200___1	2.64e-103	365	COG2982@1|root,COG2982@2|Bacteria,1MUAN@1224|Proteobacteria,1RNZM@1236|Gammaproteobacteria,1XSTY@135623|Vibrionales	135623|Vibrionales	M	AsmA family	-	-	-	ko:K07290	-	-	-	-	ko00000	9.B.121	-	-	AsmA,AsmA_2
NODE_16489_length_4627_cov_10.329834_2	102107.XP_008219161.1	0	1549	COG0046@1|root,KOG1907@2759|Eukaryota,37IK9@33090|Viridiplantae,3GFB1@35493|Streptophyta,4JEFA@91835|fabids	35493|Streptophyta	F	phosphoribosylformylglycinamidine synthase	-	GO:0000166,GO:0003674,GO:0003824,GO:0004642,GO:0005488,GO:0005524,GO:0005575,GO:0005622,GO:0005623,GO:0005737,GO:0005739,GO:0007275,GO:0008144,GO:0008150,GO:0009507,GO:0009532,GO:0009536,GO:0009555,GO:0009570,GO:0016874,GO:0016879,GO:0016884,GO:0017076,GO:0030554,GO:0032501,GO:0032502,GO:0032553,GO:0032555,GO:0032559,GO:0035639,GO:0036094,GO:0043167,GO:0043168,GO:0043226,GO:0043227,GO:0043229,GO:…	6.3.5.3	ko:K01952	ko00230,ko01100,ko01110,ko01130,map00230,map01100,map01110,map01130	M00048	R04463	RC00010,RC01160	ko00000,ko00001,ko00002,ko01000	-	-	-	AIRS_C,GATase_5
NODE_2591_length_10240_cov_11.698282_4	926569.ANT_09980	0	1954	COG0085@1|root,COG0085@2|Bacteria,2G5VH@200795|Chloroflexi	200795|Chloroflexi	K	DNA-dependent RNA polymerase catalyzes the transcription of DNA into RNA using the four ribonucleoside triphosphates as substrates	rpoB	GO:0000428,GO:0005575,GO:0005622,GO:0005623,GO:0030880,GO:0032991,GO:0044424,GO:0044464,GO:0061695,GO:1902494,GO:1990234	2.7.7.6	ko:K03043	ko00230,ko00240,ko01100,ko03020,map00230,map00240,map01100,map03020	M00183	R00435,R00441,R00442,R00443	RC02795	br01611,ko00000,ko00001,ko00002,ko01000,ko03021,ko03400	-	-	-	RNA_pol_Rpb2_1,RNA_pol_Rpb2_2,RNA_pol_Rpb2_3,RNA_pol_Rpb2_45,RNA_pol_Rpb2_6,RNA_pol_Rpb2_7
NODE_16059_length_4123_cov_15.450098_1	1123236.KB899381_gene3026	0	1601	COG0046@1|root,COG0047@1|root,COG0046@2|Bacteria,COG0047@2|Bacteria,1MYN4@1224|Proteobacteria,1RMRN@1236|Gammaproteobacteria,464EF@72275|Alteromonadaceae	1236|Gammaproteobacteria	F	Phosphoribosylformylglycinamidine synthase involved in the purines biosynthetic pathway. Catalyzes the ATP-dependent conversion of formylglycinamide ribonucleotide (FGAR) and glutamine to yield formylglycinamidine ribonucleotide (FGAM) and glutamate	purL	GO:0000166,GO:0003674,GO:0003824,GO:0004642,GO:0005488,GO:0005524,GO:0005575,GO:0005622,GO:0005623,GO:0005737,GO:0005829,GO:0006082,GO:0006139,GO:0006163,GO:0006164,GO:0006188,GO:0006189,GO:0006520,GO:0006541,GO:0006725,GO:0006753,GO:0006793,GO:0006796,GO:0006807,GO:0008144,GO:0008150,GO:0008152,GO:0009058,GO:0009064,GO:0009117,GO:0009123,GO:0009124,GO:0009126,GO:0009127,GO:0009150,GO:0009152,GO:…	6.3.5.3	ko:K01952	ko00230,ko01100,ko01110,ko01130,map00230,map01100,map01110,map01130	M00048	R04463	RC00010,RC01160	ko00000,ko00001,ko00002,ko01000	-	-	iECH74115_1262.ECH74115_3792,iECO111_1330.ECO111_3283,iECSP_1301.ECSP_3501,iECs_1301.ECs3423,iG2583_1286.G2583_3088,iJN746.PP_1037,ic_1306.c3080	AIRS_C,GATase_5
NODE_44_length_62830_cov_12.930450_43	1123487.KB892853_gene4136	1.74e-71	271	COG3164@1|root,COG3164@2|Bacteria,1MXWF@1224|Proteobacteria,2VH52@28216|Betaproteobacteria,2KUGH@206389|Rhodocyclales	206389|Rhodocyclales	S	Protein of unknown function	-	-	-	-	-	-	-	-	-	-	-	-	AsmA_2,DUF3971,DUF748
NODE_3853_length_10314_cov_7.991227_8	395493.BegalDRAFT_3086	0	1701	COG0247@1|root,COG0277@1|root,COG0247@2|Bacteria,COG0277@2|Bacteria,1MU43@1224|Proteobacteria,1RMRH@1236|Gammaproteobacteria,45ZTB@72273|Thiotrichales	72273|Thiotrichales	C	Domain of unknown function (DUF3400)	-	-	-	-	-	-	-	-	-	-	-	-	CCG,DUF3400,DUF3683,FAD-oxidase_C,FAD_binding_4,Fer4_8
NODE_2561_length_8701_cov_6.038052_3	595460.RRSWK_02560	0	1643	COG0841@1|root,COG0841@2|Bacteria,2J564@203682|Planctomycetes	2|Bacteria	V	AcrB/AcrD/AcrF family	swrC	-	-	ko:K03296,ko:K07787	ko02020,map02020	-	-	-	ko00000,ko00001,ko02000	2.A.6.1.4,2.A.6.2	-	-	ACR_tran
NODE_11047_length_6287_cov_11.958922_2	713587.THITH_04860	0	1259	COG0841@1|root,COG0841@2|Bacteria,1MU48@1224|Proteobacteria,1RMBN@1236|Gammaproteobacteria,1WW08@135613|Chromatiales	135613|Chromatiales	V	Belongs to the resistance-nodulation-cell division (RND) (TC 2.A.6) family	-	-	-	-	-	-	-	-	-	-	-	-	ACR_tran
NODE_16911_length_4572_cov_10.218729_2	1124780.ANNU01000036_gene41	0	1114	COG0145@1|root,COG0146@1|root,COG0145@2|Bacteria,COG0146@2|Bacteria,4NFBV@976|Bacteroidetes,47K85@768503|Cytophagia	976|Bacteroidetes	EQ	Hydantoinase/oxoprolinase	-	-	3.5.2.14,3.5.2.9	ko:K01469,ko:K01473	ko00330,ko00480,ko01100,map00330,map00480,map01100	-	R00251,R03187	RC00553,RC00632	ko00000,ko00001,ko01000	-	-	-	Hydant_A_N,Hydantoinase_A,Hydantoinase_B
NODE_149_length_36753_cov_5.773639_6	1536770.R50345_21455	1.12e-07	65.9	COG1409@1|root,COG1621@1|root,COG4632@1|root,COG5492@1|root,COG1409@2|Bacteria,COG1621@2|Bacteria,COG4632@2|Bacteria,COG5492@2|Bacteria,1UI3P@1239|Firmicutes,4HJMZ@91061|Bacilli,27713@186822|Paenibacillaceae	91061|Bacilli	GN	S-layer homology domain	-	-	-	-	-	-	-	-	-	-	-	-	Big_2,Metallophos,NAGPA,Pur_ac_phosph_N,SLH
NODE_262_length_29521_cov_6.616541_23	192952.MM_0647	6.4e-30	137	COG1287@1|root,arCOG02043@2157|Archaea,2XU8G@28890|Euryarchaeota,2N921@224756|Methanomicrobia	224756|Methanomicrobia	M	PFAM Oligosaccharyl transferase STT3 subunit	-	-	2.4.99.18	ko:K07151	ko00510,ko00513,ko01100,ko04141,map00510,map00513,map01100,map04141	M00072	R04216,R05976	RC00005,RC00482	ko00000,ko00001,ko00002,ko01000,ko01003	-	GT66	-	STT3
NODE_4547_length_6901_cov_26.213701_3	589865.DaAHT2_0729	0	1205	COG1643@1|root,COG1643@2|Bacteria,1MUEQ@1224|Proteobacteria,42MD4@68525|delta/epsilon subdivisions,2WJ7Z@28221|Deltaproteobacteria,2MIAK@213118|Desulfobacterales	28221|Deltaproteobacteria	L	TIGRFAM ATP-dependent helicase HrpA	hrpA	-	3.6.4.13	ko:K03578,ko:K03579	-	-	-	-	ko00000,ko01000	-	-	-	AAA_19,DEAD,DUF3418,HA2,Helicase_C,OB_NTP_bind
NODE_18365_length_4923_cov_86.813887_2	269797.Mbar_A1771	0	1830	COG1429@1|root,arCOG03022@2157|Archaea,2XT6P@28890|Euryarchaeota,2N9A0@224756|Methanomicrobia	224756|Methanomicrobia	H	PFAM CobN magnesium chelatase	-	-	6.6.1.2	ko:K02230	ko00860,ko01100,map00860,map01100	-	R05227	RC02000	ko00000,ko00001,ko01000	-	-	-	CobN-Mg_chel
NODE_560_length_22214_cov_4.980144_2	748727.CLJU_c30320	9.4e-16	92	COG2374@1|root,COG2374@2|Bacteria	2|Bacteria	-	-	-	-	-	ko:K07004	-	-	-	-	ko00000	-	-	-	Big_5,Calx-beta,Endonuclease_1,LTD
NODE_212_length_33823_cov_14.960051_4	644282.Deba_1917	3.1e-17	95.1	COG4191@1|root,COG4191@2|Bacteria,1QUMH@1224|Proteobacteria,42MM2@68525|delta/epsilon subdivisions,2WJBF@28221|Deltaproteobacteria	28221|Deltaproteobacteria	T	PFAM ATP-binding region, ATPase domain protein	-	-	-	-	-	-	-	-	-	-	-	-	HATPase_c,HisKA
NODE_16754_length_4379_cov_18.398705_1	323261.Noc_2656	8.84e-141	469	COG3164@1|root,COG3164@2|Bacteria,1MXWF@1224|Proteobacteria,1RNUK@1236|Gammaproteobacteria,1WXQJ@135613|Chromatiales	135613|Chromatiales	S	Protein of unknown function	-	-	-	-	-	-	-	-	-	-	-	-	AsmA_2,DUF3971
NODE_8620_length_5448_cov_3.903208_2	518766.Rmar_1484	8.46e-07	60.8	COG4447@1|root,COG4447@2|Bacteria	2|Bacteria	S	cellulose binding	-	-	-	-	-	-	-	-	-	-	-	-	FlgD_ig,Kelch_4
NODE_71_length_46484_cov_6.110384_18	1250278.JQNQ01000001_gene3696	2.25e-154	497	COG4258@1|root,COG4258@2|Bacteria,4PKBM@976|Bacteroidetes,1HYZW@117743|Flavobacteriia	976|Bacteroidetes	I	glycerol acyltransferase	-	-	-	ko:K07003	-	-	-	-	ko00000	-	-	-	Acyltransferase,MMPL,Methyltransf_25,Methyltransf_31
NODE_3705_length_8256_cov_19.461529_3	225937.HP15_3312	1.44e-135	454	COG2199@1|root,COG2200@1|root,COG2199@2|Bacteria,COG2200@2|Bacteria,1RGCV@1224|Proteobacteria	1224|Proteobacteria	T	Diguanylate cyclase	-	-	-	-	-	-	-	-	-	-	-	-	DUF1631,EAL,GGDEF,PilZ
NODE_2540_length_8736_cov_4.140652_7	1120951.AUBG01000006_gene406	0	951	COG1572@1|root,COG1572@2|Bacteria,4NDY7@976|Bacteroidetes,1HYJD@117743|Flavobacteriia	976|Bacteroidetes	S	Peptidase family C25	porU	-	-	-	-	-	-	-	-	-	-	-	Peptidase_C25
NODE_6154_length_6919_cov_6.414190_2	742726.HMPREF9448_00739	6.46e-90	318	COG4870@1|root,COG4870@2|Bacteria,4PNXD@976|Bacteroidetes,2G101@200643|Bacteroidia	976|Bacteroidetes	O	Propeptide_C25	-	-	-	-	-	-	-	-	-	-	-	-	Peptidase_C25,Propeptide_C25
NODE_1159_length_16096_cov_7.906552_13	1168034.FH5T_02305	0	1306	COG1472@1|root,COG3507@1|root,COG5492@1|root,COG1472@2|Bacteria,COG3507@2|Bacteria,COG5492@2|Bacteria,4NE90@976|Bacteroidetes,2FMCU@200643|Bacteroidia	976|Bacteroidetes	G	Glycosyl hydrolase family 3	-	-	3.2.1.21	ko:K05349	ko00460,ko00500,ko00940,ko01100,ko01110,map00460,map00500,map00940,map01100,map01110	-	R00026,R02558,R02887,R02985,R03527,R04949,R04998,R10035,R10039,R10040	RC00049,RC00059,RC00171,RC00262,RC00397,RC00451,RC00714,RC00746,RC01248	ko00000,ko00001,ko01000	-	GH3	-	Big_2,CBM_6,Fn3-like,Glyco_hydro_3,Glyco_hydro_3_C
NODE_1405_length_13634_cov_5.835702_3	717606.PaecuDRAFT_2136	2.69e-31	143	COG1520@1|root,COG3210@1|root,COG4412@1|root,COG5276@1|root,COG5492@1|root,COG1520@2|Bacteria,COG3210@2|Bacteria,COG4412@2|Bacteria,COG5276@2|Bacteria,COG5492@2|Bacteria,1TR9M@1239|Firmicutes,4HEPP@91061|Bacilli,26T62@186822|Paenibacillaceae	91061|Bacilli	U	S-layer homology domain	-	-	-	-	-	-	-	-	-	-	-	-	Big_2,Cadherin-like,Cohesin,Invasin_D3,SLH
NODE_1764_length_11361_cov_13.085972_7	680198.SCAB_33261	3.09e-204	634	COG4995@1|root,COG4995@2|Bacteria,2I2WN@201174|Actinobacteria	201174|Actinobacteria	S	CHAT domain	-	-	-	-	-	-	-	-	-	-	-	-	CHAT
NODE_4453_length_6963_cov_27.667487_1	1167006.UWK_01240	0	1896	COG0046@1|root,COG0047@1|root,COG0046@2|Bacteria,COG0047@2|Bacteria,1MYN4@1224|Proteobacteria,42T70@68525|delta/epsilon subdivisions,2WUHA@28221|Deltaproteobacteria,2MPSU@213118|Desulfobacterales	28221|Deltaproteobacteria	F	Phosphoribosylformylglycinamidine synthase involved in the purines biosynthetic pathway. Catalyzes the ATP-dependent conversion of formylglycinamide ribonucleotide (FGAR) and glutamine to yield formylglycinamidine ribonucleotide (FGAM) and glutamate	purL	-	6.3.5.3	ko:K01952	ko00230,ko01100,ko01110,ko01130,map00230,map01100,map01110,map01130	M00048	R04463	RC00010,RC01160	ko00000,ko00001,ko00002,ko01000	-	-	-	AIRS_C,GATase_5
NODE_13144_length_5124_cov_8.089959_1	869213.JCM21142_41798	0	2102	COG0085@1|root,COG0085@2|Bacteria,4NF8D@976|Bacteroidetes,47JXH@768503|Cytophagia	976|Bacteroidetes	K	DNA-dependent RNA polymerase catalyzes the transcription of DNA into RNA using the four ribonucleoside triphosphates as substrates	rpoB	GO:0000428,GO:0005575,GO:0005622,GO:0005623,GO:0030880,GO:0032991,GO:0044424,GO:0044464,GO:0061695,GO:1902494,GO:1990234	2.7.7.6	ko:K03043	ko00230,ko00240,ko01100,ko03020,map00230,map00240,map01100,map03020	M00183	R00435,R00441,R00442,R00443	RC02795	br01611,ko00000,ko00001,ko00002,ko01000,ko03021,ko03400	-	-	-	RNA_pol_Rpb2_1,RNA_pol_Rpb2_2,RNA_pol_Rpb2_3,RNA_pol_Rpb2_45,RNA_pol_Rpb2_6,RNA_pol_Rpb2_7
NODE_1904_length_9782_cov_7.227408_8	1168034.FH5T_04175	0	2286	COG0085@1|root,COG0085@2|Bacteria,4NF8D@976|Bacteroidetes,2FMDI@200643|Bacteroidia	976|Bacteroidetes	K	DNA-dependent RNA polymerase catalyzes the transcription of DNA into RNA using the four ribonucleoside triphosphates as substrates	rpoB	GO:0000428,GO:0005575,GO:0005622,GO:0005623,GO:0030880,GO:0032991,GO:0044424,GO:0044464,GO:0061695,GO:1902494,GO:1990234	2.7.7.6	ko:K03043	ko00230,ko00240,ko01100,ko03020,map00230,map00240,map01100,map03020	M00183	R00435,R00441,R00442,R00443	RC02795	br01611,ko00000,ko00001,ko00002,ko01000,ko03021,ko03400	-	-	-	RNA_pol_Rpb2_1,RNA_pol_Rpb2_2,RNA_pol_Rpb2_3,RNA_pol_Rpb2_45,RNA_pol_Rpb2_6,RNA_pol_Rpb2_7
NODE_6110_length_8300_cov_8.113281_3	869213.JCM21142_93988	0	1878	COG3696@1|root,COG3696@2|Bacteria,4P36A@976|Bacteroidetes,47YHX@768503|Cytophagia	976|Bacteroidetes	P	Belongs to the resistance-nodulation-cell division (RND) (TC 2.A.6) family	-	-	-	ko:K07787,ko:K15726	ko02020,map02020	-	-	-	ko00000,ko00001,ko02000	2.A.6.1.2,2.A.6.1.4	-	-	ACR_tran
NODE_4576_length_8425_cov_5.984229_1	1453500.AT05_04190	0	1942	COG0085@1|root,COG0085@2|Bacteria,4NF8D@976|Bacteroidetes,1HXXA@117743|Flavobacteriia	976|Bacteroidetes	K	DNA-dependent RNA polymerase catalyzes the transcription of DNA into RNA using the four ribonucleoside triphosphates as substrates	rpoB	GO:0000428,GO:0005575,GO:0005622,GO:0005623,GO:0030880,GO:0032991,GO:0044424,GO:0044464,GO:0061695,GO:1902494,GO:1990234	2.7.7.6	ko:K03043	ko00230,ko00240,ko01100,ko03020,map00230,map00240,map01100,map03020	M00183	R00435,R00441,R00442,R00443	RC02795	br01611,ko00000,ko00001,ko00002,ko01000,ko03021,ko03400	-	-	-	RNA_pol_Rpb2_1,RNA_pol_Rpb2_2,RNA_pol_Rpb2_3,RNA_pol_Rpb2_45,RNA_pol_Rpb2_6,RNA_pol_Rpb2_7
NODE_3332_length_9878_cov_8.070142_3	869213.JCM21142_93988	0	2015	COG3696@1|root,COG3696@2|Bacteria,4P36A@976|Bacteroidetes,47YHX@768503|Cytophagia	976|Bacteroidetes	P	Belongs to the resistance-nodulation-cell division (RND) (TC 2.A.6) family	-	-	-	ko:K07787,ko:K15726	ko02020,map02020	-	-	-	ko00000,ko00001,ko02000	2.A.6.1.2,2.A.6.1.4	-	-	ACR_tran
NODE_3340_length_7821_cov_8.859258_2	869213.JCM21142_93988	0	2015	COG3696@1|root,COG3696@2|Bacteria,4P36A@976|Bacteroidetes,47YHX@768503|Cytophagia	976|Bacteroidetes	P	Belongs to the resistance-nodulation-cell division (RND) (TC 2.A.6) family	-	-	-	ko:K07787,ko:K15726	ko02020,map02020	-	-	-	ko00000,ko00001,ko02000	2.A.6.1.2,2.A.6.1.4	-	-	ACR_tran
NODE_2090_length_13559_cov_8.389070_3	1453500.AT05_04190	0	1937	COG0085@1|root,COG0085@2|Bacteria,4NF8D@976|Bacteroidetes,1HXXA@117743|Flavobacteriia	976|Bacteroidetes	K	DNA-dependent RNA polymerase catalyzes the transcription of DNA into RNA using the four ribonucleoside triphosphates as substrates	rpoB	GO:0000428,GO:0005575,GO:0005622,GO:0005623,GO:0030880,GO:0032991,GO:0044424,GO:0044464,GO:0061695,GO:1902494,GO:1990234	2.7.7.6	ko:K03043	ko00230,ko00240,ko01100,ko03020,map00230,map00240,map01100,map03020	M00183	R00435,R00441,R00442,R00443	RC02795	br01611,ko00000,ko00001,ko00002,ko01000,ko03021,ko03400	-	-	-	RNA_pol_Rpb2_1,RNA_pol_Rpb2_2,RNA_pol_Rpb2_3,RNA_pol_Rpb2_45,RNA_pol_Rpb2_6,RNA_pol_Rpb2_7
NODE_7221_length_6765_cov_5.336811_2	1408473.JHXO01000011_gene3028	3.67e-242	733	COG1572@1|root,COG1572@2|Bacteria,4NDY7@976|Bacteroidetes,2FMIV@200643|Bacteroidia	976|Bacteroidetes	S	Peptidase family C25	porU	-	-	-	-	-	-	-	-	-	-	-	Peptidase_C25
NODE_7746_length_6259_cov_4.297550_2	755732.Fluta_2550	2.26e-280	835	COG1572@1|root,COG1572@2|Bacteria,4NDY7@976|Bacteroidetes,1HYJD@117743|Flavobacteriia,2PAHV@246874|Cryomorphaceae	976|Bacteroidetes	S	Peptidase family C25	porU	-	-	-	-	-	-	-	-	-	-	-	Peptidase_C25
NODE_4861_length_7694_cov_4.063228_4	589865.DaAHT2_2564	2.31e-99	345	COG0784@1|root,COG5000@1|root,COG5002@1|root,COG0784@2|Bacteria,COG5000@2|Bacteria,COG5002@2|Bacteria,1NC9X@1224|Proteobacteria,43BSJ@68525|delta/epsilon subdivisions,2X73B@28221|Deltaproteobacteria,2MI6A@213118|Desulfobacterales	28221|Deltaproteobacteria	T	Histidine kinase-, DNA gyrase B-, and HSP90-like ATPase	-	-	-	-	-	-	-	-	-	-	-	-	HAMP,HATPase_c,HisKA,PAS,PAS_9,Response_reg
NODE_7893_length_6500_cov_8.589294_1	1408473.JHXO01000011_gene3028	6.42e-304	892	COG1572@1|root,COG1572@2|Bacteria,4NDY7@976|Bacteroidetes,2FMIV@200643|Bacteroidia	976|Bacteroidetes	S	Peptidase family C25	porU	-	-	-	-	-	-	-	-	-	-	-	Peptidase_C25
NODE_5934_length_7035_cov_4.114613_3	1123248.KB893381_gene1063	4.91e-06	60.1	COG2374@1|root,COG2374@2|Bacteria,4PKDU@976|Bacteroidetes	976|Bacteroidetes	S	Endonuclease Exonuclease Phosphatase	-	-	-	-	-	-	-	-	-	-	-	-	Exo_endo_phos,LTD
NODE_4069_length_7282_cov_14.611872_5	497964.CfE428DRAFT_5596	0	1644	COG0085@1|root,COG0085@2|Bacteria,46S8Q@74201|Verrucomicrobia	74201|Verrucomicrobia	K	DNA-dependent RNA polymerase catalyzes the transcription of DNA into RNA using the four ribonucleoside triphosphates as substrates	rpoB	-	2.7.7.6	ko:K03043	ko00230,ko00240,ko01100,ko03020,map00230,map00240,map01100,map03020	M00183	R00435,R00441,R00442,R00443	RC02795	br01611,ko00000,ko00001,ko00002,ko01000,ko03021,ko03400	-	-	-	RNA_pol_Rpb2_1,RNA_pol_Rpb2_2,RNA_pol_Rpb2_3,RNA_pol_Rpb2_45,RNA_pol_Rpb2_6,RNA_pol_Rpb2_7
NODE_1227_length_14650_cov_3.679137_6	431943.CKL_1286	0	1492	COG0046@1|root,COG0047@1|root,COG0046@2|Bacteria,COG0047@2|Bacteria,1TPAS@1239|Firmicutes,247W2@186801|Clostridia,36UJE@31979|Clostridiaceae	186801|Clostridia	F	phosphoribosylformylglycinamidine synthase	purL	-	6.3.5.3	ko:K01952	ko00230,ko01100,ko01110,ko01130,map00230,map01100,map01110,map01130	M00048	R04463	RC00010,RC01160	ko00000,ko00001,ko00002,ko01000	-	-	-	AIRS,AIRS_C,GATase_5
NODE_16250_length_4656_cov_8.236036_2	593117.TGAM_1747	5.47e-12	80.1	arCOG02499@1|root,arCOG02537@1|root,arCOG02499@2157|Archaea,arCOG02537@2157|Archaea,2Y66W@28890|Euryarchaeota,242VN@183968|Thermococci	183968|Thermococci	P	Domain of unknown function	-	-	-	-	-	-	-	-	-	-	-	-	Beta_helix
NODE_5018_length_8048_cov_7.446140_2	1449355.JQNR01000004_gene1306	2.1e-27	129	COG4733@1|root,COG5297@1|root,COG4733@2|Bacteria,COG5297@2|Bacteria,2I2T2@201174|Actinobacteria	201174|Actinobacteria	G	PFAM glycoside hydrolase, family 48	celY	-	-	-	-	-	-	-	-	-	-	-	CBM_2,CBM_3,Glyco_hydro_48,fn3
NODE_3500_length_7684_cov_6.845720_3	1168034.FH5T_05690	0	1310	COG1572@1|root,COG1572@2|Bacteria,4NDY7@976|Bacteroidetes,2FMIV@200643|Bacteroidia	976|Bacteroidetes	S	Peptidase family C25	porU	-	-	-	-	-	-	-	-	-	-	-	Peptidase_C25
NODE_5248_length_8927_cov_12.409491_6	909663.KI867150_gene1876	0	1004	COG2984@1|root,COG4120@1|root,COG2984@2|Bacteria,COG4120@2|Bacteria,1MXGE@1224|Proteobacteria,42P9P@68525|delta/epsilon subdivisions,2WJPI@28221|Deltaproteobacteria,2MQQA@213462|Syntrophobacterales	28221|Deltaproteobacteria	S	ABC transporter substrate binding protein	-	-	-	ko:K01989,ko:K05832	-	M00247	-	-	ko00000,ko00002,ko02000	-	-	-	ABC_sub_bind,BPD_transp_2
NODE_5640_length_7204_cov_3.943768_3	931276.Cspa_c31800	7.5e-92	324	COG0493@1|root,COG1145@1|root,COG0493@2|Bacteria,COG1145@2|Bacteria,1TQ1A@1239|Firmicutes,248EK@186801|Clostridia,36FQY@31979|Clostridiaceae	186801|Clostridia	C	Oxidoreductase	-	-	-	-	-	-	-	-	-	-	-	-	Fer4,Fer4_20,Pyr_redox_2
NODE_1246_length_15545_cov_8.002066_7	446468.Ndas_4911	1.97e-133	441	COG3250@1|root,COG3250@2|Bacteria,2GMAT@201174|Actinobacteria,4EFV6@85012|Streptosporangiales	201174|Actinobacteria	G	Beta galactosidase small chain	-	-	3.2.1.23	ko:K01190	ko00052,ko00511,ko00600,ko01100,map00052,map00511,map00600,map01100	-	R01105,R01678,R03355,R04783,R06114	RC00049,RC00452	ko00000,ko00001,ko01000	-	-	-	Bgal_small_N,DUF4981,Glyco_hydro_2_C,Glyco_hydro_2_N
NODE_6124_length_7303_cov_6.677428_2	1121904.ARBP01000004_gene917	0	1239	COG0145@1|root,COG0146@1|root,COG0145@2|Bacteria,COG0146@2|Bacteria,4NFBV@976|Bacteroidetes,47K85@768503|Cytophagia	976|Bacteroidetes	EQ	Hydantoinase/oxoprolinase	-	-	3.5.2.14,3.5.2.9	ko:K01469,ko:K01473	ko00330,ko00480,ko01100,map00330,map00480,map01100	-	R00251,R03187	RC00553,RC00632	ko00000,ko00001,ko01000	-	-	-	Hydant_A_N,Hydantoinase_A,Hydantoinase_B
NODE_1716_length_10054_cov_28.255226_5	589865.DaAHT2_0814	4.81e-117	402	COG3164@1|root,COG3164@2|Bacteria,1NSC1@1224|Proteobacteria,43CFQ@68525|delta/epsilon subdivisions,2X7QS@28221|Deltaproteobacteria,2MIY3@213118|Desulfobacterales	28221|Deltaproteobacteria	S	AsmA-like C-terminal region	-	-	-	-	-	-	-	-	-	-	-	-	AsmA_2,DUF3971
NODE_12095_length_6024_cov_10.559725_3	1122134.KB893651_gene2353	0	1640	COG0646@1|root,COG1410@1|root,COG0646@2|Bacteria,COG1410@2|Bacteria,1MV6G@1224|Proteobacteria,1RMYD@1236|Gammaproteobacteria,1XHB4@135619|Oceanospirillales	135619|Oceanospirillales	E	Methionine synthase	metH	-	2.1.1.13	ko:K00548	ko00270,ko00450,ko00670,ko01100,ko01110,ko01230,map00270,map00450,map00670,map01100,map01110,map01230	M00017	R00946,R09365	RC00035,RC00113,RC01241	ko00000,ko00001,ko00002,ko01000	-	-	-	B12-binding,B12-binding_2,Met_synt_B12,Pterin_bind,S-methyl_trans
NODE_271_length_30171_cov_35.271118_13	5061.CADANGAP00009732	2.36e-12	78.6	COG1816@1|root,KOG1097@2759|Eukaryota,38HSH@33154|Opisthokonta,3NXRN@4751|Fungi,3QK4B@4890|Ascomycota,20D4C@147545|Eurotiomycetes,3S5XW@5042|Eurotiales	4751|Fungi	F	Catalyzes the hydrolytic deamination of adenine to hypoxanthine. Plays an important role in the purine salvage pathway and in nitrogen catabolism	AAH1	GO:0000034,GO:0003674,GO:0003824,GO:0005575,GO:0005622,GO:0005623,GO:0005634,GO:0005737,GO:0006139,GO:0006144,GO:0006145,GO:0006146,GO:0006725,GO:0006807,GO:0007155,GO:0007346,GO:0008150,GO:0008152,GO:0009056,GO:0009058,GO:0009112,GO:0009113,GO:0009987,GO:0010389,GO:0010564,GO:0016787,GO:0016810,GO:0016814,GO:0018130,GO:0019239,GO:0019438,GO:0019439,GO:0022610,GO:0031589,GO:0034641,GO:0034654,GO:…	3.5.4.4	ko:K01488	ko00230,ko01100,ko05340,map00230,map01100,map05340	-	R01560,R02556	RC00477	ko00000,ko00001,ko01000	-	-	-	A_deaminase
NODE_9148_length_5321_cov_4.001519_1	1137281.D778_02055	2.49e-107	368	COG3227@1|root,COG3291@1|root,COG4935@1|root,COG3227@2|Bacteria,COG3291@2|Bacteria,COG4935@2|Bacteria,4NQ5Q@976|Bacteroidetes	976|Bacteroidetes	E	Fungalysin/Thermolysin Propeptide Motif	-	-	-	ko:K20274	ko02024,map02024	-	-	-	ko00000,ko00001,ko01002	-	-	-	FTP,PepSY,Peptidase_M36,Peptidase_M4
NODE_1011_length_12398_cov_4.586000_2	1101191.KI912577_gene644	1.12e-293	877	COG0223@1|root,COG1020@1|root,COG0223@2|Bacteria,COG1020@2|Bacteria,1QK4F@1224|Proteobacteria,2TRUN@28211|Alphaproteobacteria,1JX70@119045|Methylobacteriaceae	28211|Alphaproteobacteria	Q	Formyl transferase	-	-	-	-	-	-	-	-	-	-	-	-	AMP-binding,AMP-binding_C,Bac_luciferase,Formyl_trans_C,Formyl_trans_N,PP-binding
NODE_8391_length_5507_cov_4.188188_2	1121904.ARBP01000004_gene917	0	1239	COG0145@1|root,COG0146@1|root,COG0145@2|Bacteria,COG0146@2|Bacteria,4NFBV@976|Bacteroidetes,47K85@768503|Cytophagia	976|Bacteroidetes	EQ	Hydantoinase/oxoprolinase	-	-	3.5.2.14,3.5.2.9	ko:K01469,ko:K01473	ko00330,ko00480,ko01100,map00330,map00480,map01100	-	R00251,R03187	RC00553,RC00632	ko00000,ko00001,ko01000	-	-	-	Hydant_A_N,Hydantoinase_A,Hydantoinase_B
NODE_3154_length_8003_cov_4.191495_2	935948.KE386495_gene1456	1.22e-247	741	COG3250@1|root,COG3250@2|Bacteria,1TPDC@1239|Firmicutes,248H7@186801|Clostridia,42FW8@68295|Thermoanaerobacterales	186801|Clostridia	G	glycoside hydrolase family 2 immunoglobulin domain protein beta-sandwich	-	-	3.2.1.23	ko:K01190	ko00052,ko00511,ko00600,ko01100,map00052,map00511,map00600,map01100	-	R01105,R01678,R03355,R04783,R06114	RC00049,RC00452	ko00000,ko00001,ko01000	-	-	-	Bgal_small_N,DUF4981,Glyco_hydro_2,Glyco_hydro_2_C,Glyco_hydro_2_N
NODE_11135_length_6259_cov_10.394423_3	1521187.JPIM01000015_gene3737	1.66e-62	243	COG0457@1|root,COG2114@1|root,COG3899@1|root,COG0457@2|Bacteria,COG2114@2|Bacteria,COG3899@2|Bacteria,2G699@200795|Chloroflexi,3764S@32061|Chloroflexia	32061|Chloroflexia	T	PFAM adenylyl cyclase class-3 4 guanylyl cyclase	-	-	-	-	-	-	-	-	-	-	-	-	AAA_16,Guanylate_cyc,TPR_12
NODE_1323_length_16420_cov_11.920562_12	1249627.D779_3159	0	1310	COG0841@1|root,COG0841@2|Bacteria,1MU48@1224|Proteobacteria,1RMBN@1236|Gammaproteobacteria,1WW08@135613|Chromatiales	135613|Chromatiales	V	Belongs to the resistance-nodulation-cell division (RND) (TC 2.A.6) family	-	-	-	-	-	-	-	-	-	-	-	-	ACR_tran
NODE_12903_length_4519_cov_5.291891_2	1047013.AQSP01000079_gene2040	8.64e-29	134	COG0642@1|root,COG3290@1|root,COG3292@1|root,COG2205@2|Bacteria,COG3290@2|Bacteria,COG3292@2|Bacteria,2NNZT@2323|unclassified Bacteria	2|Bacteria	T	Two component regulator propeller	-	-	2.1.1.80,2.7.11.1,3.1.1.61,3.1.3.3	ko:K07315,ko:K12132,ko:K13924	ko02020,ko02030,map02020,map02030	M00506	-	-	ko00000,ko00001,ko00002,ko01000,ko01001,ko02022,ko02035,ko03021	-	-	-	FeS,Fe_hyd_lg_C,Fer4,GGDEF,HATPase_c,HisKA,HisKA_2,PAS,PAS_3,PAS_4,PAS_9,Reg_prop,Y_Y_Y
NODE_3030_length_8118_cov_12.847823_4	309799.DICTH_0562	2.44e-47	194	COG0457@1|root,COG1305@1|root,COG0457@2|Bacteria,COG1305@2|Bacteria	2|Bacteria	E	Transglutaminase-like superfamily	-	-	-	-	-	-	-	-	-	-	-	-	DUF3857,DUF3858,Transglut_core
NODE_2148_length_11230_cov_4.079374_8	1408433.JHXV01000020_gene3544	0	946	COG1629@1|root,COG4771@2|Bacteria,4NTQD@976|Bacteroidetes,1IKD4@117743|Flavobacteriia,2PA9C@246874|Cryomorphaceae	976|Bacteroidetes	P	Carboxypeptidase regulatory-like domain	-	-	-	-	-	-	-	-	-	-	-	-	CarbopepD_reg_2,CarboxypepD_reg,Plug,TonB_dep_Rec
NODE_1641_length_12715_cov_3.658057_6	1535422.ND16A_3700	1.95e-233	706	COG0841@1|root,COG0841@2|Bacteria,1MU48@1224|Proteobacteria,1RMBN@1236|Gammaproteobacteria,2Q7FQ@267889|Colwelliaceae	1236|Gammaproteobacteria	V	MMPL family	mdtB	-	-	ko:K03296	-	-	-	-	ko00000	2.A.6.2	-	-	ACR_tran
NODE_3372_length_8598_cov_276.114011_6	1198232.CYCME_0807	1.14e-120	413	COG3164@1|root,COG3164@2|Bacteria,1MXWF@1224|Proteobacteria,1RNUK@1236|Gammaproteobacteria,460QS@72273|Thiotrichales	72273|Thiotrichales	S	TIGRFAM TIGR02099 family protein	-	-	-	-	-	-	-	-	-	-	-	-	AsmA_2,DUF3971
NODE_13423_length_4447_cov_28.232013_1	292415.Tbd_2254	8.97e-13	81.6	COG2982@1|root,COG2982@2|Bacteria,1MUAN@1224|Proteobacteria,2VJ6I@28216|Betaproteobacteria	28216|Betaproteobacteria	M	PFAM AsmA family protein	asmA	-	-	ko:K07289,ko:K07290	-	-	-	-	ko00000	9.B.121	-	-	AsmA
NODE_3649_length_10567_cov_7.251998_3	1121396.KB893065_gene1612	1.93e-135	451	COG2319@1|root,COG4249@1|root,COG2319@2|Bacteria,COG4249@2|Bacteria,1MWJA@1224|Proteobacteria,42P8D@68525|delta/epsilon subdivisions,2WMH1@28221|Deltaproteobacteria,2MNF7@213118|Desulfobacterales	28221|Deltaproteobacteria	KLT	WD40 repeats	-	-	2.7.11.1	ko:K12132	-	-	-	-	ko00000,ko01000,ko01001	-	-	-	AAA_35,Pkinase,WD40
NODE_23_length_75334_cov_9.077950_40	391589.RGAI101_1087	4.33e-265	795	COG3012@1|root,COG3012@2|Bacteria,1PGAQ@1224|Proteobacteria,2U86P@28211|Alphaproteobacteria	28211|Alphaproteobacteria	S	SEC-C Motif Domain Protein	-	-	-	-	-	-	-	-	-	-	-	-	-
NODE_20453_length_4200_cov_11.159228_2	391009.Tmel_1138	3.43e-74	262	COG0493@1|root,COG0493@2|Bacteria,2GC2N@200918|Thermotogae	200918|Thermotogae	C	Pyridine nucleotide-disulphide oxidoreductase	-	-	1.4.1.13,1.4.1.14	ko:K00266	ko00250,ko00910,ko01100,ko01110,ko01120,ko01130,ko01230,map00250,map00910,map01100,map01110,map01120,map01130,map01230	-	R00093,R00114,R00248	RC00006,RC00010,RC02799	ko00000,ko00001,ko01000	-	-	-	Fer4_20,Pyr_redox_2
NODE_309_length_28725_cov_7.011545_9	641526.ADIWIN_1564	2.66e-05	57.8	COG1345@1|root,COG1345@2|Bacteria,4PNP2@976|Bacteroidetes	976|Bacteroidetes	EN	Concanavalin A-like lectin/glucanases superfamily	-	-	-	-	-	-	-	-	-	-	-	-	Laminin_G_3,MAM
NODE_1156_length_15069_cov_4.643533_6	700598.Niako_0570	1.9e-114	395	COG5000@1|root,COG5000@2|Bacteria,4NE49@976|Bacteroidetes,1INZH@117747|Sphingobacteriia	976|Bacteroidetes	T	Histidine kinase-, DNA gyrase B-, and HSP90-like ATPase	zraS_1	-	-	-	-	-	-	-	-	-	-	-	HATPase_c,HisKA
NODE_4407_length_7659_cov_5.338769_2	1116472.MGMO_61c00140	5.3e-120	410	COG3164@1|root,COG3164@2|Bacteria,1MXWF@1224|Proteobacteria,1RNUK@1236|Gammaproteobacteria,1XDVI@135618|Methylococcales	135618|Methylococcales	S	Protein of unknown function	-	-	-	-	-	-	-	-	-	-	-	-	AsmA_2,DUF3971
NODE_2925_length_10532_cov_6.122077_5	1120998.AUFC01000001_gene1761	1.32e-233	709	COG0493@1|root,COG3383@1|root,COG0493@2|Bacteria,COG3383@2|Bacteria,1TQ1A@1239|Firmicutes,248EK@186801|Clostridia,3WCXB@538999|Clostridiales incertae sedis	186801|Clostridia	C	Dihydroprymidine dehydrogenase domain II, 4Fe-4S cluster	-	-	1.17.1.9,1.3.1.1	ko:K00123,ko:K17722	ko00240,ko00410,ko00630,ko00680,ko00770,ko01100,ko01120,ko01200,map00240,map00410,map00630,map00680,map00770,map01100,map01120,map01200	M00046	R00519,R00977,R01414,R11026	RC00072,RC00123,RC02796	ko00000,ko00001,ko00002,ko01000	-	-	-	Fe_hyd_SSU,Fe_hyd_lg_C,Fer2_4,Fer4,Fer4_20,Fer4_9,Molybdop_Fe4S4,Molybdopterin,Pyr_redox_2,Pyr_redox_3
NODE_18688_length_4377_cov_7.649236_2	984262.SGRA_0326	6.09e-109	379	COG5000@1|root,COG5000@2|Bacteria,4NE49@976|Bacteroidetes,1INZH@117747|Sphingobacteriia	976|Bacteroidetes	T	Histidine kinase-, DNA gyrase B-, and HSP90-like ATPase	zraS_1	-	-	-	-	-	-	-	-	-	-	-	HATPase_c,HisKA
NODE_1383_length_14814_cov_8.808795_9	331678.Cphamn1_0703	3.03e-05	53.5	2AB0C@1|root,348SZ@2|Bacteria	2|Bacteria	-	-	-	-	-	-	-	-	-	-	-	-	-	-	-
NODE_3949_length_8040_cov_19.433939_1	338966.Ppro_0366	2.1e-266	798	COG3299@1|root,COG3299@2|Bacteria,1MY5J@1224|Proteobacteria,42MH5@68525|delta/epsilon subdivisions,2WM0U@28221|Deltaproteobacteria,43VXV@69541|Desulfuromonadales	28221|Deltaproteobacteria	S	Baseplate J-like protein	-	-	-	-	-	-	-	-	-	-	-	-	Baseplate_J
NODE_6042_length_8345_cov_12.044994_2	754477.Q7C_1306	0	1593	COG0646@1|root,COG1410@1|root,COG0646@2|Bacteria,COG1410@2|Bacteria,1MV6G@1224|Proteobacteria,1RMYD@1236|Gammaproteobacteria,4600V@72273|Thiotrichales	72273|Thiotrichales	E	Vitamin B12 dependent methionine synthase, activation	metH	-	2.1.1.13	ko:K00548	ko00270,ko00450,ko00670,ko01100,ko01110,ko01230,map00270,map00450,map00670,map01100,map01110,map01230	M00017	R00946,R09365	RC00035,RC00113,RC01241	ko00000,ko00001,ko00002,ko01000	-	-	-	B12-binding,B12-binding_2,Met_synt_B12,Pterin_bind,S-methyl_trans
NODE_1566_length_14032_cov_8.501181_3	639282.DEFDS_0291	2.2e-253	762	COG0846@1|root,COG0846@2|Bacteria	2|Bacteria	K	NAD+ binding	-	-	-	-	-	-	-	-	-	-	-	-	SIR2_2
NODE_14022_length_4754_cov_10.195361_2	1123288.SOV_2c07390	1.75e-157	490	COG4988@1|root,COG4988@2|Bacteria,1TQ1P@1239|Firmicutes,4H32C@909932|Negativicutes	909932|Negativicutes	V	thiol reductant ABC exporter, CydD subunit	cydD	-	-	ko:K16013,ko:K16014	ko02010,map02010	-	-	-	ko00000,ko00001,ko02000	3.A.1.129	-	-	ABC_membrane,ABC_tran
NODE_7542_length_7525_cov_9.261847_3	1120998.AUFC01000001_gene1761	9.4e-237	717	COG0493@1|root,COG3383@1|root,COG0493@2|Bacteria,COG3383@2|Bacteria,1TQ1A@1239|Firmicutes,248EK@186801|Clostridia,3WCXB@538999|Clostridiales incertae sedis	186801|Clostridia	C	Dihydroprymidine dehydrogenase domain II, 4Fe-4S cluster	-	-	1.17.1.9,1.3.1.1	ko:K00123,ko:K17722	ko00240,ko00410,ko00630,ko00680,ko00770,ko01100,ko01120,ko01200,map00240,map00410,map00630,map00680,map00770,map01100,map01120,map01200	M00046	R00519,R00977,R01414,R11026	RC00072,RC00123,RC02796	ko00000,ko00001,ko00002,ko01000	-	-	-	Fe_hyd_SSU,Fe_hyd_lg_C,Fer2_4,Fer4,Fer4_20,Fer4_9,Molybdop_Fe4S4,Molybdopterin,Pyr_redox_2,Pyr_redox_3
NODE_2421_length_10641_cov_3.554317_8	1408473.JHXO01000005_gene1852	0	1745	COG0046@1|root,COG0047@1|root,COG0046@2|Bacteria,COG0047@2|Bacteria,4NETY@976|Bacteroidetes,2FM2Z@200643|Bacteroidia	976|Bacteroidetes	F	Phosphoribosylformylglycinamidine synthase involved in the purines biosynthetic pathway. Catalyzes the ATP-dependent conversion of formylglycinamide ribonucleotide (FGAR) and glutamine to yield formylglycinamidine ribonucleotide (FGAM) and glutamate	purL	-	6.3.5.3	ko:K01952	ko00230,ko01100,ko01110,ko01130,map00230,map01100,map01110,map01130	M00048	R04463	RC00010,RC01160	ko00000,ko00001,ko00002,ko01000	-	-	-	AIRS_C,GATase_5
NODE_346_length_17634_cov_4.549349_8	391587.KAOT1_07368	2.17e-138	454	COG3299@1|root,COG3299@2|Bacteria,4NF69@976|Bacteroidetes,1HYP7@117743|Flavobacteriia	976|Bacteroidetes	S	homolog of phage Mu protein gp47	-	-	-	-	-	-	-	-	-	-	-	-	Baseplate_J
NODE_1421_length_10903_cov_5.154314_2	1237149.C900_01647	0	1619	COG0046@1|root,COG0047@1|root,COG0046@2|Bacteria,COG0047@2|Bacteria,4NETY@976|Bacteroidetes,47NAM@768503|Cytophagia	976|Bacteroidetes	F	Part of the phosphoribosylformylglycinamidine synthase complex involved in the purines biosynthetic pathway. Catalyzes the ATP-dependent conversion of formylglycinamide ribonucleotide (FGAR) and glutamine to yield formylglycinamidine ribonucleotide (FGAM) and glutamate. The FGAM synthase complex is composed of three subunits. PurQ produces an ammonia molecule by converting glutamine to glutamate.…	purL	-	6.3.5.3	ko:K01952	ko00230,ko01100,ko01110,ko01130,map00230,map01100,map01110,map01130	M00048	R04463	RC00010,RC01160	ko00000,ko00001,ko00002,ko01000	-	-	-	AIRS_C,GATase_5
NODE_1072_length_16738_cov_8.208056_7	984262.SGRA_0326	2.51e-107	374	COG5000@1|root,COG5000@2|Bacteria,4NE49@976|Bacteroidetes,1INZH@117747|Sphingobacteriia	976|Bacteroidetes	T	Histidine kinase-, DNA gyrase B-, and HSP90-like ATPase	zraS_1	-	-	-	-	-	-	-	-	-	-	-	HATPase_c,HisKA
NODE_8748_length_6198_cov_8.205600_3	411477.PARMER_03288	0	1614	COG0046@1|root,COG0047@1|root,COG0046@2|Bacteria,COG0047@2|Bacteria,4NETY@976|Bacteroidetes,2FM2Z@200643|Bacteroidia,22W21@171551|Porphyromonadaceae	976|Bacteroidetes	F	Phosphoribosylformylglycinamidine synthase involved in the purines biosynthetic pathway. Catalyzes the ATP-dependent conversion of formylglycinamide ribonucleotide (FGAR) and glutamine to yield formylglycinamidine ribonucleotide (FGAM) and glutamate	purL	-	6.3.5.3	ko:K01952	ko00230,ko01100,ko01110,ko01130,map00230,map01100,map01110,map01130	M00048	R04463	RC00010,RC01160	ko00000,ko00001,ko00002,ko01000	-	-	-	AIRS_C,GATase_5
NODE_843_length_18604_cov_8.806782_7	1124780.ANNU01000032_gene1259	0	1521	COG0646@1|root,COG1410@1|root,COG0646@2|Bacteria,COG1410@2|Bacteria,4NFRF@976|Bacteroidetes,47K8Q@768503|Cytophagia	976|Bacteroidetes	E	Vitamin B12 dependent methionine synthase activation	metH	-	2.1.1.13	ko:K00548	ko00270,ko00450,ko00670,ko01100,ko01110,ko01230,map00270,map00450,map00670,map01100,map01110,map01230	M00017	R00946,R09365	RC00035,RC00113,RC01241	ko00000,ko00001,ko00002,ko01000	-	-	-	B12-binding,B12-binding_2,Met_synt_B12,Pterin_bind,S-methyl_trans
NODE_6059_length_6977_cov_8.117596_2	555779.Dthio_PD3239	8.66e-282	816	COG1614@1|root,COG1614@2|Bacteria,1MVI5@1224|Proteobacteria,42N9A@68525|delta/epsilon subdivisions,2WK4H@28221|Deltaproteobacteria	28221|Deltaproteobacteria	C	PFAM CO dehydrogenase acetyl-CoA synthase complex beta subunit	-	-	2.3.1.169	ko:K14138	ko00720,ko01120,ko01200,map00720,map01120,map01200	M00377	R08433,R10243	RC00004,RC00113,RC01144,RC02963,RC02964,RC02977	ko00000,ko00001,ko00002,ko01000	-	-	-	CdhC
NODE_940_length_12660_cov_4.494804_7	1168034.FH5T_06675	0	1549	COG0646@1|root,COG1410@1|root,COG0646@2|Bacteria,COG1410@2|Bacteria,4NFRF@976|Bacteroidetes,2FMI7@200643|Bacteroidia	976|Bacteroidetes	E	5-methyltetrahydrofolate--homocysteine methyltransferase	metH	-	2.1.1.13	ko:K00548	ko00270,ko00450,ko00670,ko01100,ko01110,ko01230,map00270,map00450,map00670,map01100,map01110,map01230	M00017	R00946,R09365	RC00035,RC00113,RC01241	ko00000,ko00001,ko00002,ko01000	-	-	-	B12-binding,B12-binding_2,Met_synt_B12,Pterin_bind,S-methyl_trans
NODE_2426_length_12753_cov_7.614900_2	411477.PARMER_03288	0	1606	COG0046@1|root,COG0047@1|root,COG0046@2|Bacteria,COG0047@2|Bacteria,4NETY@976|Bacteroidetes,2FM2Z@200643|Bacteroidia,22W21@171551|Porphyromonadaceae	976|Bacteroidetes	F	Phosphoribosylformylglycinamidine synthase involved in the purines biosynthetic pathway. Catalyzes the ATP-dependent conversion of formylglycinamide ribonucleotide (FGAR) and glutamine to yield formylglycinamidine ribonucleotide (FGAM) and glutamate	purL	-	6.3.5.3	ko:K01952	ko00230,ko01100,ko01110,ko01130,map00230,map01100,map01110,map01130	M00048	R04463	RC00010,RC01160	ko00000,ko00001,ko00002,ko01000	-	-	-	AIRS_C,GATase_5
NODE_871_length_19506_cov_8.917434_2	519989.ECTPHS_06137	0	1672	COG0646@1|root,COG1410@1|root,COG0646@2|Bacteria,COG1410@2|Bacteria,1MV6G@1224|Proteobacteria,1RMYD@1236|Gammaproteobacteria,1WW84@135613|Chromatiales	135613|Chromatiales	E	Vitamin B12 dependent methionine synthase activation	metH	-	2.1.1.13	ko:K00548	ko00270,ko00450,ko00670,ko01100,ko01110,ko01230,map00270,map00450,map00670,map01100,map01110,map01230	M00017	R00946,R09365	RC00035,RC00113,RC01241	ko00000,ko00001,ko00002,ko01000	-	-	-	B12-binding,B12-binding_2,Met_synt_B12,Pterin_bind,S-methyl_trans
NODE_5228_length_7886_cov_11.335079_3	266940.Krad_4408	1.9e-44	184	COG1074@1|root,COG1074@2|Bacteria,2GNKH@201174|Actinobacteria	201174|Actinobacteria	L	A helicase nuclease that prepares dsDNA breaks (DSB) for recombinational DNA repair. Binds to DSBs and unwinds DNA via a highly rapid and processive ATP-dependent bidirectional helicase activity. Unwinds dsDNA until it encounters a Chi (crossover hotspot instigator) sequence from the 3' direction. Cuts ssDNA a few nucleotides 3' to the Chi site. The properties and activities of the enzyme are cha…	-	-	-	-	-	-	-	-	-	-	-	-	PDDEXK_1,UvrD-helicase,UvrD_C
NODE_4226_length_9853_cov_33.051643_4	675816.VIA_001663	8.86e-11	75.5	COG3291@1|root,COG3291@2|Bacteria,1R3UF@1224|Proteobacteria,1RYBG@1236|Gammaproteobacteria,1XUY1@135623|Vibrionales	135623|Vibrionales	O	Collagenase	-	GO:0005575,GO:0005576	3.4.24.3	ko:K01387	-	-	-	-	ko00000,ko01000,ko01002,ko02042	-	-	-	PKD,Peptidase_M9,Peptidase_M9_N
NODE_5789_length_7504_cov_5.163915_2	869213.JCM21142_106	1.57e-117	402	COG5000@1|root,COG5000@2|Bacteria,4NE49@976|Bacteroidetes,47JEP@768503|Cytophagia	976|Bacteroidetes	T	Histidine kinase-, DNA gyrase B-, and HSP90-like ATPase	zraS_1	-	-	-	-	-	-	-	-	-	-	-	HATPase_c,HisKA
NODE_1504_length_14294_cov_7.781586_7	1484460.JSWG01000006_gene3028	4.6e-34	152	COG3210@1|root,COG3291@1|root,COG3391@1|root,COG3866@1|root,COG3210@2|Bacteria,COG3291@2|Bacteria,COG3391@2|Bacteria,COG3866@2|Bacteria,4P09P@976|Bacteroidetes,1I0G9@117743|Flavobacteriia	976|Bacteroidetes	G	Pectate lyase	-	-	-	-	-	-	-	-	-	-	-	-	CBM_3,Laminin_G_3,Lipase_GDSL_2,fn3
NODE_10168_length_6540_cov_8.537240_3	1089547.KB913013_gene2464	0	1491	COG0646@1|root,COG1410@1|root,COG0646@2|Bacteria,COG1410@2|Bacteria,4NFRF@976|Bacteroidetes,47K8Q@768503|Cytophagia	976|Bacteroidetes	E	Vitamin B12 dependent methionine synthase activation	metH	-	2.1.1.13	ko:K00548	ko00270,ko00450,ko00670,ko01100,ko01110,ko01230,map00270,map00450,map00670,map01100,map01110,map01230	M00017	R00946,R09365	RC00035,RC00113,RC01241	ko00000,ko00001,ko00002,ko01000	-	-	-	B12-binding,B12-binding_2,Met_synt_B12,Pterin_bind,S-methyl_trans
NODE_6353_length_8147_cov_7.179066_2	33876.JNXY01000009_gene9128	1.16e-09	70.1	COG1413@1|root,COG1413@2|Bacteria,2INKI@201174|Actinobacteria,4DHQ2@85008|Micromonosporales	201174|Actinobacteria	C	HEAT repeat	-	-	-	-	-	-	-	-	-	-	-	-	HEAT_2,HEAT_PBS
NODE_10994_length_6302_cov_11.172083_4	1128427.KB904821_gene746	0	1410	COG0145@1|root,COG0146@1|root,COG0145@2|Bacteria,COG0146@2|Bacteria,1G02W@1117|Cyanobacteria,1H8RM@1150|Oscillatoriales	1117|Cyanobacteria	EQ	N-methylhydantoinase B acetone carboxylase alpha subunit	oplaH	-	3.5.2.9	ko:K01469	ko00480,map00480	-	R00251	RC00553	ko00000,ko00001,ko01000	-	-	-	Hydant_A_N,Hydantoinase_A,Hydantoinase_B
NODE_11010_length_6299_cov_4.687220_2	1033737.CAEV01000059_gene3676	1.38e-139	462	COG0587@1|root,COG0587@2|Bacteria,1TPYG@1239|Firmicutes,247U0@186801|Clostridia,36DHP@31979|Clostridiaceae	186801|Clostridia	L	DNA polymerase	dnaE	-	2.7.7.7	ko:K02337,ko:K14162	ko00230,ko00240,ko01100,ko03030,ko03430,ko03440,map00230,map00240,map01100,map03030,map03430,map03440	M00260	R00375,R00376,R00377,R00378	RC02795	ko00000,ko00001,ko00002,ko01000,ko03032,ko03400	-	-	-	DNA_pol3_alpha,HHH_6,PHP,tRNA_anti-codon
NODE_3297_length_9936_cov_8.354519_2	643867.Ftrac_1153	1.42e-74	280	COG0457@1|root,COG4995@1|root,COG0457@2|Bacteria,COG4995@2|Bacteria,4NKPZ@976|Bacteroidetes,47N11@768503|Cytophagia	976|Bacteroidetes	S	CHAT domain	-	-	-	-	-	-	-	-	-	-	-	-	CHAT,TPR_10,TPR_12
NODE_12349_length_5049_cov_7.024229_1	667632.KB890193_gene3329	1.12e-136	450	COG2114@1|root,COG3899@1|root,COG2114@2|Bacteria,COG3899@2|Bacteria,1MUDT@1224|Proteobacteria,2VKH1@28216|Betaproteobacteria,1JZT2@119060|Burkholderiaceae	28216|Betaproteobacteria	T	adenylyl cyclase class-3 4 guanylyl cyclase	-	-	-	-	-	-	-	-	-	-	-	-	AAA_16,DZR,Guanylate_cyc,TPR_4,zinc_ribbon_2
NODE_135_length_41634_cov_6.280622_20	1192034.CAP_3613	3.16e-87	317	COG3523@1|root,COG3523@2|Bacteria,1P850@1224|Proteobacteria,42YRD@68525|delta/epsilon subdivisions,2WTQ6@28221|Deltaproteobacteria,2YUUW@29|Myxococcales	28221|Deltaproteobacteria	S	Type VI secretion protein IcmF C-terminal	-	-	-	ko:K11891	ko02025,ko03070,map02025,map03070	M00334	-	-	ko00000,ko00001,ko00002,ko02044	3.A.23.1	-	-	IcmF_C
NODE_1207_length_15760_cov_13.991595_10	1207063.P24_13960	7.56e-61	228	COG0438@1|root,COG0438@2|Bacteria,1PAJ3@1224|Proteobacteria,2U2P6@28211|Alphaproteobacteria	28211|Alphaproteobacteria	M	transferase activity, transferring glycosyl groups	-	-	-	-	-	-	-	-	-	-	-	-	-
NODE_6693_length_7970_cov_7.828301_5	56110.Oscil6304_2815	5.13e-67	258	COG1404@1|root,COG1520@1|root,COG2931@1|root,COG4733@1|root,COG4935@1|root,COG1404@2|Bacteria,COG1520@2|Bacteria,COG2931@2|Bacteria,COG4733@2|Bacteria,COG4935@2|Bacteria,1G342@1117|Cyanobacteria,1HH6R@1150|Oscillatoriales	1117|Cyanobacteria	O	Beta-propeller repeat	-	-	-	-	-	-	-	-	-	-	-	-	Calx-beta,DUF4114,P_proprotein,Peptidase_S8,SBBP
NODE_140_length_40971_cov_16.283434_14	673860.AciM339_1135	1.16e-280	827	COG0493@1|root,COG1148@1|root,arCOG01292@2157|Archaea,arCOG02235@2157|Archaea,2XT3X@28890|Euryarchaeota,3F2J5@33867|unclassified Euryarchaeota	28890|Euryarchaeota	C	NAD(P)-binding Rossmann-like domain	hdrA-2	-	1.8.7.3,1.8.98.4,1.8.98.5,1.8.98.6	ko:K03388	ko00680,ko01100,ko01120,ko01200,map00680,map01100,map01120,map01200	M00356,M00357,M00563,M00567	R04540,R11928,R11931,R11943,R11944	RC00011	ko00000,ko00001,ko00002,ko01000	-	-	-	Fer4,Fer4_17,Fer4_4,Fer4_7,Fer4_9,Pyr_redox_2
NODE_221_length_33235_cov_9.632098_14	395963.Bind_3407	2.14e-12	78.2	COG4974@1|root,COG4974@2|Bacteria,1MVNF@1224|Proteobacteria,2TRAA@28211|Alphaproteobacteria,3N9M6@45404|Beijerinckiaceae	28211|Alphaproteobacteria	L	Phage integrase, N-terminal SAM-like domain	xerD	-	-	ko:K04763	-	-	-	-	ko00000,ko03036	-	-	-	Phage_int_SAM_1,Phage_integrase
NODE_9555_length_5953_cov_8.239912_5	1250005.PHEL85_0702	0	1199	COG0438@1|root,COG4632@1|root,COG0438@2|Bacteria,COG4632@2|Bacteria,4NR1M@976|Bacteroidetes,1I6BU@117743|Flavobacteriia	976|Bacteroidetes	G	Phosphodiester glycosidase	-	-	-	-	-	-	-	-	-	-	-	-	Metallophos,NAGPA,fn3
NODE_9710_length_5638_cov_14.190041_4	1120966.AUBU01000022_gene3009	1.05e-110	384	28K0R@1|root,2Z9QM@2|Bacteria,4NHJW@976|Bacteroidetes,47TW9@768503|Cytophagia	976|Bacteroidetes	-	-	-	-	-	-	-	-	-	-	-	-	-	-	-
NODE_5161_length_7157_cov_19.170656_4	1380391.JIAS01000006_gene2517	0	1540	COG0145@1|root,COG0146@1|root,COG0145@2|Bacteria,COG0146@2|Bacteria,1MU2Y@1224|Proteobacteria,2TQZ6@28211|Alphaproteobacteria,2JQPR@204441|Rhodospirillales	204441|Rhodospirillales	EQ	Hydantoinase/oxoprolinase N-terminal region	-	-	3.5.2.9	ko:K01469	ko00480,map00480	-	R00251	RC00553	ko00000,ko00001,ko01000	-	-	-	Hydant_A_N,Hydantoinase_A,Hydantoinase_B
NODE_3924_length_7326_cov_13.778160_2	666681.M301_0621	1.55e-39	159	COG0607@1|root,COG2905@1|root,COG0607@2|Bacteria,COG2905@2|Bacteria,1R9Q1@1224|Proteobacteria,2VQGZ@28216|Betaproteobacteria,2KNP5@206350|Nitrosomonadales	206350|Nitrosomonadales	PT	Cyclic nucleotide-monophosphate binding domain	-	-	-	-	-	-	-	-	-	-	-	-	Rhodanese,cNMP_binding
NODE_12414_length_5037_cov_6.909474_2	661478.OP10G_0125	1.03e-30	132	COG0601@1|root,COG0601@2|Bacteria	2|Bacteria	P	nitrogen compound transport	oppB	GO:0003674,GO:0005215,GO:0005575,GO:0005623,GO:0005886,GO:0006810,GO:0008150,GO:0016020,GO:0022857,GO:0044464,GO:0051179,GO:0051234,GO:0055085,GO:0071944	-	ko:K02033,ko:K15581,ko:K16200	ko01501,ko02010,ko02024,map01501,map02010,map02024	M00239,M00439,M00566	-	-	ko00000,ko00001,ko00002,ko02000	3.A.1.5,3.A.1.5.1,3.A.1.5.18,3.A.1.5.19,3.A.1.5.2,3.A.1.5.25	-	iLJ478.TM1747,iYO844.BSU12930	BPD_transp_1
NODE_18965_length_3996_cov_4.534636_1	1121101.HMPREF1532_01895	2.38e-257	748	COG1874@1|root,COG1874@2|Bacteria,4NE2P@976|Bacteroidetes,2FN5P@200643|Bacteroidia,4ANTF@815|Bacteroidaceae	976|Bacteroidetes	G	Belongs to the glycosyl hydrolase 35 family	-	-	-	-	-	-	-	-	-	-	-	-	Glyco_hydro_35
NODE_10428_length_6461_cov_11.003746_3	697282.Mettu_3480	0	1836	COG0674@1|root,COG1013@1|root,COG1014@1|root,COG1145@1|root,COG0674@2|Bacteria,COG1013@2|Bacteria,COG1014@2|Bacteria,COG1145@2|Bacteria,1MVM0@1224|Proteobacteria,1RNNX@1236|Gammaproteobacteria,1XE3B@135618|Methylococcales	135618|Methylococcales	C	Oxidoreductase required for the transfer of electrons from pyruvate to flavodoxin	-	-	1.2.7.1	ko:K03737	ko00010,ko00020,ko00620,ko00650,ko00720,ko01100,ko01120,ko01130,ko01200,map00010,map00020,map00620,map00650,map00720,map01100,map01120,map01130,map01200	M00173,M00307	R01196,R10866	RC00004,RC02742	br01601,ko00000,ko00001,ko00002,ko01000	-	-	-	EKR,Fer4_16,PFOR_II,POR,POR_N,TPP_enzyme_C
NODE_169_length_21946_cov_4.782285_23	391587.KAOT1_14862	1.97e-135	457	COG1345@1|root,COG4932@1|root,COG1345@2|Bacteria,COG4932@2|Bacteria,4NGSK@976|Bacteroidetes,1HXWK@117743|Flavobacteriia	976|Bacteroidetes	N	Zinc metalloprotease (Elastase)	-	-	-	-	-	-	-	-	-	-	-	-	Flg_new,LTD
NODE_4025_length_7968_cov_11.021863_6	933262.AXAM01000010_gene1349	2.42e-198	602	COG1196@1|root,COG1196@2|Bacteria,1MUAQ@1224|Proteobacteria,42MN9@68525|delta/epsilon subdivisions,2WJZF@28221|Deltaproteobacteria,2MHU0@213118|Desulfobacterales	28221|Deltaproteobacteria	D	Required for chromosome condensation and partitioning	smc	-	-	ko:K03529	-	-	-	-	ko00000,ko03036	-	-	-	SMC_N,SMC_hinge
NODE_271_length_30171_cov_35.271118_11	313595.P700755_002122	1.99e-05	58.2	2AB0C@1|root,348SZ@2|Bacteria	2|Bacteria	-	-	-	-	-	-	-	-	-	-	-	-	-	-	-
NODE_20722_length_3958_cov_9.560338_1	111780.Sta7437_0945	1.41e-130	439	COG1429@1|root,COG1429@2|Bacteria,1G0XP@1117|Cyanobacteria,3VITC@52604|Pleurocapsales	1117|Cyanobacteria	H	TIGRFAM cobaltochelatase, CobN subunit	cobN	-	6.6.1.2	ko:K02230	ko00860,ko01100,map00860,map01100	-	R05227	RC02000	ko00000,ko00001,ko01000	-	-	-	CobN-Mg_chel
NODE_14482_length_4660_cov_24.297286_1	686340.Metal_3349	0	1724	COG0674@1|root,COG1013@1|root,COG1014@1|root,COG0674@2|Bacteria,COG1013@2|Bacteria,COG1014@2|Bacteria,1MVM0@1224|Proteobacteria,1RNNX@1236|Gammaproteobacteria,1XE3B@135618|Methylococcales	135618|Methylococcales	C	Oxidoreductase required for the transfer of electrons from pyruvate to flavodoxin	-	-	1.2.7.1	ko:K03737	ko00010,ko00020,ko00620,ko00650,ko00720,ko01100,ko01120,ko01130,ko01200,map00010,map00020,map00620,map00650,map00720,map01100,map01120,map01130,map01200	M00173,M00307	R01196,R10866	RC00004,RC02742	br01601,ko00000,ko00001,ko00002,ko01000	-	-	-	EKR,Fer4_16,PFOR_II,POR,POR_N,TPP_enzyme_C
NODE_1775_length_13254_cov_4.233654_9	153721.MYP_3351	2.28e-257	768	COG1404@1|root,COG1409@1|root,COG2273@1|root,COG1404@2|Bacteria,COG1409@2|Bacteria,COG2273@2|Bacteria	2|Bacteria	G	xyloglucan:xyloglucosyl transferase activity	-	-	3.2.1.4	ko:K01179	ko00500,ko01100,map00500,map01100	-	R06200,R11307,R11308	-	ko00000,ko00001,ko01000	-	GH5,GH9	-	CBM_4_9,CHB_HEX_C_1,CotH,DUF5006,DUF5014,LTD,Metallophos,Peptidase_M43
NODE_6302_length_8185_cov_18.343665_3	1047013.AQSP01000140_gene2461	2.34e-117	377	COG0438@1|root,COG0438@2|Bacteria,2NQED@2323|unclassified Bacteria	2|Bacteria	M	Glycosyl transferases group 1	-	-	-	-	-	-	-	-	-	-	-	-	Glyco_trans_1_4,Glycos_transf_1
NODE_14894_length_4624_cov_5.728825_2	1236689.MMALV_02170	1.09e-153	499	COG1196@1|root,arCOG00371@2157|Archaea,2XSVK@28890|Euryarchaeota,3F2HY@33867|unclassified Euryarchaeota	28890|Euryarchaeota	D	Required for chromosome condensation and partitioning	smc	-	-	ko:K03529	-	-	-	-	ko00000,ko03036	-	-	-	SMC_N,SMC_hinge
NODE_19926_length_4252_cov_8.984751_3	269797.Mbar_A1626	2.22e-109	364	COG1404@1|root,arCOG02512@1|root,arCOG00702@2157|Archaea,arCOG02512@2157|Archaea,2XTGN@28890|Euryarchaeota,2N9WH@224756|Methanomicrobia	224756|Methanomicrobia	O	Subtilase family	-	-	-	ko:K17734	-	-	-	-	ko00000,ko01000,ko01002	-	-	-	Calx-beta,Inhibitor_I9,Peptidase_S8
NODE_15177_length_5395_cov_7.255805_3	330214.NIDE4091	5.73e-134	452	COG3419@1|root,COG3419@2|Bacteria,3J100@40117|Nitrospirae	40117|Nitrospirae	NU	Tfp pilus assembly protein tip-associated adhesin	-	-	-	ko:K02674	-	-	-	-	ko00000,ko02035,ko02044	-	-	-	Neisseria_PilC
NODE_1405_length_13634_cov_5.835702_5	269797.Mbar_A1684	9.26e-07	62.4	arCOG02498@1|root,arCOG02526@1|root,arCOG02498@2157|Archaea,arCOG02526@2157|Archaea,2Y0XD@28890|Euryarchaeota	28890|Euryarchaeota	S	Periplasmic copper-binding protein (NosD)	-	-	-	-	-	-	-	-	-	-	-	-	NosD
NODE_29_length_69705_cov_14.424250_23	1047013.AQSP01000066_gene718	0	1376	COG3419@1|root,COG3419@2|Bacteria	2|Bacteria	NU	Tfp pilus assembly protein tip-associated adhesin	pilY1	-	-	ko:K02674	-	-	-	-	ko00000,ko02035,ko02044	-	-	-	Neisseria_PilC,VWA_2
NODE_1473_length_14428_cov_8.827941_6	1168034.FH5T_12615	2.59e-97	344	COG0642@1|root,COG5002@1|root,COG2205@2|Bacteria,COG5002@2|Bacteria,4NDXU@976|Bacteroidetes,2FM06@200643|Bacteroidia	976|Bacteroidetes	T	Psort location CytoplasmicMembrane, score	-	-	-	-	-	-	-	-	-	-	-	-	HATPase_c,HisKA,PAS_3,PAS_4,PAS_9,Response_reg
NODE_417_length_25280_cov_8.291021_6	344747.PM8797T_07714	7.23e-131	438	COG3063@1|root,COG3063@2|Bacteria,2J4ZV@203682|Planctomycetes	203682|Planctomycetes	NU	Repeat domain in Vibrio, Colwellia, Bradyrhizobium and Shewanella	-	-	-	-	-	-	-	-	-	-	-	-	VCBS
NODE_4206_length_7181_cov_6.131771_2	247490.KSU1_C0273	1.9e-191	597	COG4447@1|root,COG4447@2|Bacteria	2|Bacteria	S	cellulose binding	-	-	-	-	-	-	-	-	-	-	-	-	Beta_helix,Big_3_2,PSII_BNR,TIG,VCBS
NODE_8317_length_6346_cov_8.828644_3	385682.AFSL01000008_gene2602	5.6e-128	408	COG1418@1|root,COG2114@1|root,COG1418@2|Bacteria,COG2114@2|Bacteria,4PIV7@976|Bacteroidetes,2G20W@200643|Bacteroidia,3XIT9@558415|Marinilabiliaceae	976|Bacteroidetes	T	Adenylyl- / guanylyl cyclase, catalytic domain	-	-	-	-	-	-	-	-	-	-	-	-	Guanylate_cyc,HD
NODE_9727_length_5910_cov_8.406490_2	1122179.KB890497_gene2838	1.78e-100	350	COG1409@1|root,COG2312@1|root,COG1409@2|Bacteria,COG2312@2|Bacteria,4PP0J@976|Bacteroidetes	976|Bacteroidetes	E	CotH kinase protein	-	-	-	-	-	-	-	-	-	-	-	-	CHB_HEX_C_1,CotH,LTD
NODE_1520_length_10622_cov_14.093404_4	1121087.AUCK01000001_gene2660	2.78e-115	395	COG1196@1|root,COG1196@2|Bacteria,1TPJV@1239|Firmicutes,4HB89@91061|Bacilli,1ZAWM@1386|Bacillus	91061|Bacilli	D	Required for chromosome condensation and partitioning	smc	GO:0003674,GO:0005488,GO:0005515,GO:0042802	-	ko:K03529	-	-	-	-	ko00000,ko03036	-	-	-	SMC_N,SMC_hinge
NODE_3814_length_7419_cov_26.384438_1	589865.DaAHT2_1400	0	1623	COG0587@1|root,COG0587@2|Bacteria,1MUIF@1224|Proteobacteria,42MGP@68525|delta/epsilon subdivisions,2WIZ2@28221|Deltaproteobacteria,2MI79@213118|Desulfobacterales	28221|Deltaproteobacteria	L	DNA polymerase III alpha subunit	dnaE	-	2.7.7.7	ko:K02337	ko00230,ko00240,ko01100,ko03030,ko03430,ko03440,map00230,map00240,map01100,map03030,map03430,map03440	M00260	R00375,R00376,R00377,R00378	RC02795	ko00000,ko00001,ko00002,ko01000,ko03032,ko03400	-	-	-	DNA_pol3_alpha,HHH_6,PHP,tRNA_anti-codon
NODE_2493_length_8720_cov_15.390652_3	519989.ECTPHS_05561	2.76e-287	845	COG1196@1|root,COG1196@2|Bacteria,1MUAQ@1224|Proteobacteria,1RNA6@1236|Gammaproteobacteria,1WW7V@135613|Chromatiales	135613|Chromatiales	D	Required for chromosome condensation and partitioning	smc	-	-	ko:K03529	-	-	-	-	ko00000,ko03036	-	-	-	SMC_N,SMC_hinge
NODE_1230_length_13285_cov_18.689645_2	1255043.TVNIR_1350	0	1779	28HY3@1|root,2Z83I@2|Bacteria,1R5P3@1224|Proteobacteria,1S1M3@1236|Gammaproteobacteria	1236|Gammaproteobacteria	S	phosphoenolpyruvate carboxykinase (diphosphate) activity	-	-	4.1.1.38	ko:K20370	ko00620,ko01100,map00620,map01100	-	R00346	RC02741	ko00000,ko00001,ko01000	-	-	-	-
NODE_6572_length_6070_cov_13.153450_2	997346.HMPREF9374_3890	2.82e-315	917	COG0587@1|root,COG0587@2|Bacteria,1TPYG@1239|Firmicutes,4H9T3@91061|Bacilli,27BHW@186824|Thermoactinomycetaceae	91061|Bacilli	L	Helix-hairpin-helix motif	dnaE	-	2.7.7.7	ko:K02337	ko00230,ko00240,ko01100,ko03030,ko03430,ko03440,map00230,map00240,map01100,map03030,map03430,map03440	M00260	R00375,R00376,R00377,R00378	RC02795	ko00000,ko00001,ko00002,ko01000,ko03032,ko03400	-	-	-	DNA_pol3_alpha,HHH_6,PHP,tRNA_anti-codon
NODE_1923_length_9741_cov_5.860211_3	313603.FB2170_07984	0	1858	COG0674@1|root,COG1013@1|root,COG1014@1|root,COG0674@2|Bacteria,COG1013@2|Bacteria,COG1014@2|Bacteria,4NF4F@976|Bacteroidetes,1HXEG@117743|Flavobacteriia	976|Bacteroidetes	C	Pyruvate flavodoxin/ferredoxin oxidoreductase, thiamine diP-bdg	nifJ	-	1.2.7.1	ko:K03737	ko00010,ko00020,ko00620,ko00650,ko00720,ko01100,ko01120,ko01130,ko01200,map00010,map00020,map00620,map00650,map00720,map01100,map01120,map01130,map01200	M00173,M00307	R01196,R10866	RC00004,RC02742	br01601,ko00000,ko00001,ko00002,ko01000	-	-	-	EKR,Fer4_16,Fer4_7,PFOR_II,POR,POR_N,TPP_enzyme_C
NODE_15515_length_5339_cov_11.588191_3	519989.ECTPHS_05561	4.53e-300	878	COG1196@1|root,COG1196@2|Bacteria,1MUAQ@1224|Proteobacteria,1RNA6@1236|Gammaproteobacteria,1WW7V@135613|Chromatiales	135613|Chromatiales	D	Required for chromosome condensation and partitioning	smc	-	-	ko:K03529	-	-	-	-	ko00000,ko03036	-	-	-	SMC_N,SMC_hinge
NODE_14643_length_4875_cov_12.767427_2	1238425.J07HQW2_02840	6.86e-150	488	COG1196@1|root,arCOG00371@2157|Archaea,2XSVK@28890|Euryarchaeota,23SBM@183963|Halobacteria	183963|Halobacteria	D	Required for chromosome condensation and partitioning	smc	-	-	ko:K03529	-	-	-	-	ko00000,ko03036	-	-	-	SMC_N,SMC_hinge
NODE_4058_length_8328_cov_12.130787_4	696281.Desru_1348	0	1003	COG0587@1|root,COG0587@2|Bacteria,1TPYG@1239|Firmicutes,247U0@186801|Clostridia,2605R@186807|Peptococcaceae	186801|Clostridia	L	DNA polymerase III alpha subunit	dnaE	-	2.7.7.7	ko:K02337	ko00230,ko00240,ko01100,ko03030,ko03430,ko03440,map00230,map00240,map01100,map03030,map03430,map03440	M00260	R00375,R00376,R00377,R00378	RC02795	ko00000,ko00001,ko00002,ko01000,ko03032,ko03400	-	-	-	DNA_pol3_alpha,HHH_6,PHP,tRNA_anti-codon
NODE_2281_length_13101_cov_6.273264_7	1125863.JAFN01000001_gene2544	0	908	COG1614@1|root,COG1614@2|Bacteria,1MVI5@1224|Proteobacteria,42N9A@68525|delta/epsilon subdivisions,2WK4H@28221|Deltaproteobacteria	28221|Deltaproteobacteria	C	PFAM CO dehydrogenase acetyl-CoA synthase complex beta subunit	-	-	2.3.1.169	ko:K14138	ko00720,ko01120,ko01200,map00720,map01120,map01200	M00377	R08433,R10243	RC00004,RC00113,RC01144,RC02963,RC02964,RC02977	ko00000,ko00001,ko00002,ko01000	-	-	-	CdhC
NODE_26878_length_4100_cov_11.138937_2	1122176.KB903532_gene2556	1.93e-54	209	COG1404@1|root,COG3087@1|root,COG1404@2|Bacteria,COG3087@2|Bacteria,4NF1M@976|Bacteroidetes,1IWKE@117747|Sphingobacteriia	976|Bacteroidetes	O	Subtilase family	-	-	-	-	-	-	-	-	-	-	-	-	Peptidase_S8,SPOR
NODE_203_length_34638_cov_16.183269_13	697282.Mettu_3688	3.92e-24	118	COG5001@1|root,COG5001@2|Bacteria,1MU2C@1224|Proteobacteria,1RM8A@1236|Gammaproteobacteria,1XDYH@135618|Methylococcales	1236|Gammaproteobacteria	T	Diguanylate cyclase phosphodiesterase with PAS PAC	-	-	-	-	-	-	-	-	-	-	-	-	EAL,GGDEF,PAS,PAS_3,PAS_4,PAS_8,PAS_9
NODE_217_length_33564_cov_12.408756_3	1027273.GZ77_14900	1.37e-259	774	COG1196@1|root,COG1196@2|Bacteria,1MUAQ@1224|Proteobacteria,1RNA6@1236|Gammaproteobacteria,1XH98@135619|Oceanospirillales	135619|Oceanospirillales	D	Required for chromosome condensation and partitioning	smc	-	-	ko:K03529	-	-	-	-	ko00000,ko03036	-	-	-	SMC_N,SMC_hinge
NODE_3328_length_9140_cov_4.456907_5	1047013.AQSP01000101_gene610	0	1683	COG0674@1|root,COG1013@1|root,COG1014@1|root,COG0674@2|Bacteria,COG1013@2|Bacteria,COG1014@2|Bacteria,2NP1J@2323|unclassified Bacteria	2|Bacteria	C	Oxidoreductase required for the transfer of electrons from pyruvate to flavodoxin	nifJ	GO:0003674,GO:0003824,GO:0006950,GO:0006979,GO:0008150,GO:0008152,GO:0016491,GO:0016625,GO:0016903,GO:0043873,GO:0050896,GO:0055114	1.2.7.1	ko:K03737	ko00010,ko00020,ko00620,ko00650,ko00720,ko01100,ko01120,ko01130,ko01200,map00010,map00020,map00620,map00650,map00720,map01100,map01120,map01130,map01200	M00173,M00307	R01196,R10866	RC00004,RC02742	br01601,ko00000,ko00001,ko00002,ko01000	-	-	iJN678.nifJ,iLF82_1304.LF82_2789,iNRG857_1313.NRG857_06920	EKR,Fer4,Fer4_16,Fer4_7,PFOR_II,POR,POR_N,TPP_enzyme_C
NODE_1387_length_13724_cov_9.565660_9	1304284.L21TH_1534	0	1732	COG0674@1|root,COG1013@1|root,COG1014@1|root,COG1143@1|root,COG0674@2|Bacteria,COG1013@2|Bacteria,COG1014@2|Bacteria,COG1143@2|Bacteria,1TQJ2@1239|Firmicutes,248FW@186801|Clostridia,36EA6@31979|Clostridiaceae	186801|Clostridia	C	Oxidoreductase required for the transfer of electrons from pyruvate to flavodoxin	nifJ	-	1.2.7.1	ko:K03737	ko00010,ko00020,ko00620,ko00650,ko00720,ko01100,ko01120,ko01130,ko01200,map00010,map00020,map00620,map00650,map00720,map01100,map01120,map01130,map01200	M00173,M00307	R01196,R10866	RC00004,RC02742	br01601,ko00000,ko00001,ko00002,ko01000	-	-	-	EKR,Fer4_16,Fer4_7,PFOR_II,POR,POR_N,TPP_enzyme_C
NODE_4218_length_7808_cov_11.352638_5	933262.AXAM01000036_gene2181	0	1406	COG1197@1|root,COG1197@2|Bacteria,1MUXG@1224|Proteobacteria,42N8X@68525|delta/epsilon subdivisions,2WIVR@28221|Deltaproteobacteria,2MI3P@213118|Desulfobacterales	28221|Deltaproteobacteria	L	Couples transcription and DNA repair by recognizing RNA polymerase (RNAP) stalled at DNA lesions. Mediates ATP-dependent release of RNAP and its truncated transcript from the DNA, and recruitment of nucleotide excision repair machinery to the damaged site	mfd	-	-	ko:K03723	ko03420,map03420	-	-	-	ko00000,ko00001,ko01000,ko03400	-	-	-	CarD_CdnL_TRCF,DEAD,Helicase_C,TRCF
NODE_5167_length_6641_cov_7.947312_4	519989.ECTPHS_08558	0	1495	COG0587@1|root,COG0587@2|Bacteria,1MUIF@1224|Proteobacteria,1RP0K@1236|Gammaproteobacteria,1WVZ3@135613|Chromatiales	135613|Chromatiales	L	DNA polymerase III alpha subunit	-	-	2.7.7.7	ko:K02337	ko00230,ko00240,ko01100,ko03030,ko03430,ko03440,map00230,map00240,map01100,map03030,map03430,map03440	M00260	R00375,R00376,R00377,R00378	RC02795	ko00000,ko00001,ko00002,ko01000,ko03032,ko03400	-	-	-	DNA_pol3_alpha,HHH_6,Intein_splicing,LAGLIDADG_3,PHP,tRNA_anti-codon
NODE_3460_length_10826_cov_89.546003_5	192952.MM_1031	0	1076	COG1196@1|root,arCOG00371@2157|Archaea,2XSVK@28890|Euryarchaeota,2N92I@224756|Methanomicrobia	224756|Methanomicrobia	D	Required for chromosome condensation and partitioning	smc	-	-	ko:K03529	-	-	-	-	ko00000,ko03036	-	-	-	SMC_N,SMC_hinge
NODE_9_length_74827_cov_4.921669_25	1158146.KB907125_gene2259	2.68e-101	340	COG5001@1|root,COG5001@2|Bacteria,1MU2C@1224|Proteobacteria	1224|Proteobacteria	T	Diguanylate cyclase	-	-	-	-	-	-	-	-	-	-	-	-	CHASE,EAL,GGDEF,PAS,PAS_8
NODE_1250_length_14520_cov_6.229450_3	1121406.JAEX01000011_gene2071	0	1581	COG0674@1|root,COG1013@1|root,COG1014@1|root,COG1145@1|root,COG0674@2|Bacteria,COG1013@2|Bacteria,COG1014@2|Bacteria,COG1145@2|Bacteria,1MVM0@1224|Proteobacteria,42MZ0@68525|delta/epsilon subdivisions,2WJ96@28221|Deltaproteobacteria,2M85Y@213115|Desulfovibrionales	28221|Deltaproteobacteria	C	Oxidoreductase required for the transfer of electrons from pyruvate to flavodoxin	poR	-	1.2.7.1	ko:K03737	ko00010,ko00020,ko00620,ko00650,ko00720,ko01100,ko01120,ko01130,ko01200,map00010,map00020,map00620,map00650,map00720,map01100,map01120,map01130,map01200	M00173,M00307	R01196,R10866	RC00004,RC02742	br01601,ko00000,ko00001,ko00002,ko01000	-	-	-	EKR,Fer4_16,PFOR_II,POR,POR_N,TPP_enzyme_C
NODE_9329_length_5284_cov_5.746797_2	1408433.JHXV01000018_gene3795	3.72e-194	603	COG0265@1|root,COG3673@1|root,COG4412@1|root,COG0265@2|Bacteria,COG3673@2|Bacteria,COG4412@2|Bacteria,4PNUK@976|Bacteroidetes,1IKEA@117743|Flavobacteriia,2PA7S@246874|Cryomorphaceae	976|Bacteroidetes	O	Peptide-N-glycosidase F, C terminal	-	-	-	-	-	-	-	-	-	-	-	-	Laminin_G_3,N-glycanase_C
NODE_11647_length_5425_cov_9.446369_2	1283300.ATXB01000001_gene450	3.86e-13	83.2	COG0790@1|root,COG4249@1|root,COG4372@1|root,COG0790@2|Bacteria,COG4249@2|Bacteria,COG4372@2|Bacteria,1MWPA@1224|Proteobacteria,1RRKA@1236|Gammaproteobacteria,1XDWF@135618|Methylococcales	135618|Methylococcales	M	Caspase domain	-	-	-	-	-	-	-	-	-	-	-	-	Peptidase_C14,Sel1
NODE_2000_length_13861_cov_9.107127_5	1209072.ALBT01000011_gene3144	0	1001	COG1196@1|root,COG1196@2|Bacteria,1MUAQ@1224|Proteobacteria,1RNA6@1236|Gammaproteobacteria,1FGBQ@10|Cellvibrio	1236|Gammaproteobacteria	D	Required for chromosome condensation and partitioning	smc	-	-	ko:K03529	-	-	-	-	ko00000,ko03036	-	-	-	SMC_N,SMC_hinge
NODE_24562_length_3608_cov_4.841542_1	509635.N824_04995	3.7e-27	129	COG3291@1|root,COG3291@2|Bacteria,4NJ47@976|Bacteroidetes,1IPFX@117747|Sphingobacteriia	976|Bacteroidetes	N	C-terminal domain of CHU protein family	-	-	-	-	-	-	-	-	-	-	-	-	CHU_C,PKD
NODE_1297_length_11261_cov_4.955292_3	242619.PG_0232	2.22e-24	119	COG2866@1|root,COG3291@1|root,COG2866@2|Bacteria,COG3291@2|Bacteria,4NGV7@976|Bacteroidetes,2FRH7@200643|Bacteroidia,230R0@171551|Porphyromonadaceae	976|Bacteroidetes	E	PKD domain	-	-	-	-	-	-	-	-	-	-	-	-	CarboxypepD_reg,Laminin_G_3,PKD,Peptidase_M14
NODE_185_length_34552_cov_18.784097_2	1265505.ATUG01000001_gene4580	0	1174	COG3523@1|root,COG3523@2|Bacteria,1MV3D@1224|Proteobacteria,42PG2@68525|delta/epsilon subdivisions,2WM2G@28221|Deltaproteobacteria,2MKC5@213118|Desulfobacterales	28221|Deltaproteobacteria	S	ImcF-related N-terminal domain	tssM	-	-	ko:K11891	ko02025,ko03070,map02025,map03070	M00334	-	-	ko00000,ko00001,ko00002,ko02044	3.A.23.1	-	-	IcmF-related,IcmF_C,ImcF-related_N
NODE_185_length_34552_cov_18.784097_21	909663.KI867150_gene193	5.32e-45	168	COG1943@1|root,COG1943@2|Bacteria,1P19I@1224|Proteobacteria,42PP3@68525|delta/epsilon subdivisions,2X227@28221|Deltaproteobacteria,2MQQ2@213462|Syntrophobacterales	28221|Deltaproteobacteria	L	Transposase IS200 like	-	-	-	ko:K07491	-	-	-	-	ko00000	-	-	-	Y1_Tnp
NODE_185_length_34552_cov_18.784097_22	1521187.JPIM01000020_gene216	1.29e-20	86.3	COG2445@1|root,COG2445@2|Bacteria,2G9YT@200795|Chloroflexi,377CM@32061|Chloroflexia	32061|Chloroflexia	S	Protein of unknown function DUF86	-	-	-	-	-	-	-	-	-	-	-	-	DUF86
NODE_185_length_34552_cov_18.784097_23	472759.Nhal_1487	7.63e-27	101	COG4118@1|root,COG4118@2|Bacteria,1PBET@1224|Proteobacteria,1SURJ@1236|Gammaproteobacteria,1X1KC@135613|Chromatiales	135613|Chromatiales	D	Antitoxin component of a toxin-antitoxin (TA) module	-	-	-	-	-	-	-	-	-	-	-	-	PhdYeFM_antitox
NODE_185_length_34552_cov_18.784097_24	102129.Lepto7375DRAFT_1857	2.45e-37	129	2CIC7@1|root,32X5Y@2|Bacteria,1G8XZ@1117|Cyanobacteria,1HG09@1150|Oscillatoriales	1117|Cyanobacteria	-	-	-	-	-	-	-	-	-	-	-	-	-	-	-
NODE_185_length_34552_cov_18.784097_25	1173264.KI913949_gene2172	9.36e-21	85.9	2E5BP@1|root,3303Q@2|Bacteria,1GA0Q@1117|Cyanobacteria,1HG7W@1150|Oscillatoriales	1117|Cyanobacteria	S	Protein of unknown function (DUF2283)	-	-	-	-	-	-	-	-	-	-	-	-	DUF2283
NODE_185_length_34552_cov_18.784097_26	69014.TK1128	8.34e-07	50.8	COG1708@1|root,arCOG01201@2157|Archaea,2Y6GW@28890|Euryarchaeota,244IK@183968|Thermococci	183968|Thermococci	S	Nucleotidyltransferase domain	-	-	-	-	-	-	-	-	-	-	-	-	NTP_transf_2
NODE_185_length_34552_cov_18.784097_27	1499967.BAYZ01000063_gene6013	3.43e-12	67	COG1895@1|root,COG1895@2|Bacteria,2NRPS@2323|unclassified Bacteria	2|Bacteria	S	HEPN domain	-	-	-	-	-	-	-	-	-	-	-	-	HEPN
NODE_12196_length_5310_cov_7.419600_2	1255043.TVNIR_1350	0	1738	28HY3@1|root,2Z83I@2|Bacteria,1R5P3@1224|Proteobacteria,1S1M3@1236|Gammaproteobacteria	1236|Gammaproteobacteria	S	phosphoenolpyruvate carboxykinase (diphosphate) activity	-	-	4.1.1.38	ko:K20370	ko00620,ko01100,map00620,map01100	-	R00346	RC02741	ko00000,ko00001,ko01000	-	-	-	-
NODE_4443_length_9629_cov_8.461771_4	686340.Metal_0488	0	1414	COG0587@1|root,COG0587@2|Bacteria,1MUIF@1224|Proteobacteria,1RP0K@1236|Gammaproteobacteria,1XEKH@135618|Methylococcales	135618|Methylococcales	L	Bacterial DNA polymerase III, alpha subunit	dnaE	-	2.7.7.7	ko:K02337	ko00230,ko00240,ko01100,ko03030,ko03430,ko03440,map00230,map00240,map01100,map03030,map03430,map03440	M00260	R00375,R00376,R00377,R00378	RC02795	ko00000,ko00001,ko00002,ko01000,ko03032,ko03400	-	-	-	DNA_pol3_alpha,HHH_6,PHP,tRNA_anti-codon
NODE_1812_length_12137_cov_4.011091_3	391596.PBAL39_17036	7.21e-80	283	COG2204@1|root,COG3829@1|root,COG2204@2|Bacteria,COG3829@2|Bacteria,4NE89@976|Bacteroidetes	976|Bacteroidetes	T	COG2204 Response regulator containing CheY-like receiver, AAA-type ATPase, and DNA-binding domains	-	-	-	-	-	-	-	-	-	-	-	-	HTH_8,Response_reg,Sigma54_activat
NODE_23262_length_3516_cov_26.487431_1	4641.GSMUA_Achr3P14470_001	3.3e-235	724	COG0574@1|root,2QQ6R@2759|Eukaryota,37KSG@33090|Viridiplantae,3GDUC@35493|Streptophyta,3KPWZ@4447|Liliopsida	35493|Streptophyta	G	Pyruvate phosphate dikinase, PEP/pyruvate binding domain	-	GO:0000272,GO:0003674,GO:0003824,GO:0005575,GO:0005622,GO:0005623,GO:0005737,GO:0005739,GO:0005975,GO:0005976,GO:0005982,GO:0005983,GO:0006073,GO:0006793,GO:0006796,GO:0006950,GO:0008150,GO:0008152,GO:0009056,GO:0009057,GO:0009251,GO:0009266,GO:0009409,GO:0009507,GO:0009526,GO:0009532,GO:0009536,GO:0009570,GO:0009605,GO:0009607,GO:0009608,GO:0009610,GO:0009620,GO:0009628,GO:0009631,GO:0009941,GO:…	2.7.9.4	ko:K08244	-	-	-	-	ko00000,ko01000	-	-	-	PPDK_N
NODE_18507_length_4905_cov_13.284742_1	1123401.JHYQ01000028_gene3169	0	979	COG0553@1|root,COG0553@2|Bacteria,1MV6M@1224|Proteobacteria,1RQ34@1236|Gammaproteobacteria	1236|Gammaproteobacteria	KL	COG0553 Superfamily II DNA RNA helicases, SNF2 family	-	-	-	-	-	-	-	-	-	-	-	-	Helicase_C,SNF2_N
NODE_977_length_17490_cov_33.000803_2	690850.Desaf_2238	9.29e-294	861	COG3523@1|root,COG3523@2|Bacteria,1MV3D@1224|Proteobacteria,42PG2@68525|delta/epsilon subdivisions,2WM2G@28221|Deltaproteobacteria,2M7UZ@213115|Desulfovibrionales	28221|Deltaproteobacteria	S	ImcF-related N-terminal domain	tssM	-	-	ko:K11891	ko02025,ko03070,map02025,map03070	M00334	-	-	ko00000,ko00001,ko00002,ko02044	3.A.23.1	-	-	IcmF-related,IcmF_C,ImcF-related_N
NODE_9044_length_6106_cov_4.347381_4	344747.PM8797T_02169	1.7e-109	374	COG1409@1|root,COG1520@1|root,COG1409@2|Bacteria,COG1520@2|Bacteria,2IXB6@203682|Planctomycetes	203682|Planctomycetes	S	Concanavalin A-like lectin/glucanases superfamily	-	-	-	-	-	-	-	-	-	-	-	-	Laminin_G_3,Metallophos,Methyltransf_25,PQQ_2
NODE_2203_length_9208_cov_4.459849_3	1121904.ARBP01000011_gene1559	0	1696	COG3119@1|root,COG3408@1|root,COG3119@2|Bacteria,COG3408@2|Bacteria,4NHH7@976|Bacteroidetes,47NG8@768503|Cytophagia	976|Bacteroidetes	GP	Domain of unknown function (DUF4976)	-	-	-	-	-	-	-	-	-	-	-	-	Bac_rhamnosid,Bac_rhamnosid6H,Bac_rhamnosid_C,DUF4976,Sulfatase
NODE_931_length_14881_cov_12.493997_5	933262.AXAM01000023_gene658	0	1672	COG0587@1|root,COG0587@2|Bacteria,1MUIF@1224|Proteobacteria,42MGP@68525|delta/epsilon subdivisions,2WIZ2@28221|Deltaproteobacteria,2MI79@213118|Desulfobacterales	28221|Deltaproteobacteria	L	DNA polymerase III alpha subunit	dnaE	-	2.7.7.7	ko:K02337	ko00230,ko00240,ko01100,ko03030,ko03430,ko03440,map00230,map00240,map01100,map03030,map03430,map03440	M00260	R00375,R00376,R00377,R00378	RC02795	ko00000,ko00001,ko00002,ko01000,ko03032,ko03400	-	-	-	DNA_pol3_alpha,HHH_6,PHP,tRNA_anti-codon
NODE_10578_length_5418_cov_3.820250_4	398512.JQKC01000026_gene3826	3.81e-95	333	COG5337@1|root,COG5337@2|Bacteria,1TRAW@1239|Firmicutes,24AQY@186801|Clostridia,3WI9B@541000|Ruminococcaceae	186801|Clostridia	M	Fn3 associated	-	-	-	-	-	-	-	-	-	-	-	-	CHB_HEX_C_1,CotH,Fn3_assoc,LTD
NODE_19504_length_4079_cov_3.959990_2	153721.MYP_3351	6.58e-250	748	COG1404@1|root,COG1409@1|root,COG2273@1|root,COG1404@2|Bacteria,COG1409@2|Bacteria,COG2273@2|Bacteria	2|Bacteria	G	xyloglucan:xyloglucosyl transferase activity	-	-	3.2.1.4	ko:K01179	ko00500,ko01100,map00500,map01100	-	R06200,R11307,R11308	-	ko00000,ko00001,ko01000	-	GH5,GH9	-	CBM_4_9,CHB_HEX_C_1,CotH,DUF5006,DUF5014,LTD,Metallophos,Peptidase_M43
NODE_22245_length_3591_cov_12.966346_1	1348635.BBJY01000002_gene3429	0	1258	COG0587@1|root,COG0587@2|Bacteria,1MUIF@1224|Proteobacteria,1RP0K@1236|Gammaproteobacteria,1XTXD@135623|Vibrionales	135623|Vibrionales	L	COG0587 DNA polymerase III, alpha subunit	dnaE	GO:0003674,GO:0003824,GO:0003887,GO:0005575,GO:0005622,GO:0005623,GO:0006139,GO:0006259,GO:0006260,GO:0006725,GO:0006807,GO:0008150,GO:0008152,GO:0009058,GO:0009059,GO:0009360,GO:0009987,GO:0016740,GO:0016772,GO:0016779,GO:0018130,GO:0019438,GO:0032991,GO:0034061,GO:0034641,GO:0034645,GO:0034654,GO:0042575,GO:0043170,GO:0044237,GO:0044238,GO:0044249,GO:0044260,GO:0044271,GO:0044424,GO:0044464,GO:…	2.7.7.7	ko:K02337	ko00230,ko00240,ko01100,ko03030,ko03430,ko03440,map00230,map00240,map01100,map03030,map03430,map03440	M00260	R00375,R00376,R00377,R00378	RC02795	ko00000,ko00001,ko00002,ko01000,ko03032,ko03400	-	-	-	DNA_pol3_alpha,HHH_6,PHP,tRNA_anti-codon
NODE_11018_length_6296_cov_15.304599_3	65093.PCC7418_2863	4.69e-96	345	COG2202@1|root,COG2203@1|root,COG3829@1|root,COG3920@1|root,COG5002@1|root,COG2202@2|Bacteria,COG2203@2|Bacteria,COG3829@2|Bacteria,COG3920@2|Bacteria,COG5002@2|Bacteria,1GHCI@1117|Cyanobacteria	1117|Cyanobacteria	T	Histidine kinase-, DNA gyrase B-, and HSP90-like ATPase	-	-	-	-	-	-	-	-	-	-	-	-	CBS,GAF,HATPase_c,HisKA_2,PAS_3,PAS_4,PAS_9
NODE_644_length_20752_cov_7.805914_3	246197.MXAN_6067	1.59e-11	78.2	COG1572@1|root,COG1572@2|Bacteria,1Q29U@1224|Proteobacteria,437WP@68525|delta/epsilon subdivisions,2WYQ0@28221|Deltaproteobacteria,2YUQ2@29|Myxococcales	28221|Deltaproteobacteria	S	CARDB	-	-	-	-	-	-	-	-	-	-	-	-	CARDB
NODE_5007_length_8059_cov_8.639180_3	1408473.JHXO01000004_gene144	0	1030	COG0574@1|root,COG0574@2|Bacteria,4NGSQ@976|Bacteroidetes,2FM60@200643|Bacteroidia	976|Bacteroidetes	GKT	Pyruvate phosphate dikinase, PEP pyruvate binding domain	-	-	-	-	-	-	-	-	-	-	-	-	PPDK_N
NODE_10165_length_5520_cov_3.456359_1	1237149.C900_01254	1.51e-06	62	COG1404@1|root,COG3391@1|root,COG1404@2|Bacteria,COG3391@2|Bacteria,4NF1M@976|Bacteroidetes	976|Bacteroidetes	O	Belongs to the peptidase S8 family	-	-	-	-	-	-	-	-	-	-	-	-	Peptidase_S8,Peptidase_S8_N
NODE_1526_length_12104_cov_4.002656_3	247490.KSU1_C0273	3.02e-190	593	COG4447@1|root,COG4447@2|Bacteria	2|Bacteria	S	cellulose binding	-	-	-	-	-	-	-	-	-	-	-	-	Beta_helix,Big_3_2,PSII_BNR,TIG,VCBS
NODE_2617_length_11154_cov_8.579151_4	314287.GB2207_09826	0	1201	28HKI@1|root,2Z7VC@2|Bacteria,1MW0I@1224|Proteobacteria,1RQ5H@1236|Gammaproteobacteria	1236|Gammaproteobacteria	-	-	-	-	-	-	-	-	-	-	-	-	-	-	-
NODE_7984_length_6179_cov_3.309112_2	240015.ACP_0604	6.29e-26	125	COG2911@1|root,COG2911@2|Bacteria,3Y3A6@57723|Acidobacteria,2JHS8@204432|Acidobacteriia	204432|Acidobacteriia	M	TamB, inner membrane protein subunit of TAM complex	-	-	-	ko:K09800	-	-	-	-	ko00000,ko02000	-	-	-	TamB
NODE_21358_length_4115_cov_14.784729_3	1265505.ATUG01000002_gene2546	3.35e-08	67	COG0419@1|root,COG0419@2|Bacteria,1R4Z9@1224|Proteobacteria,430FK@68525|delta/epsilon subdivisions,2WW2M@28221|Deltaproteobacteria	28221|Deltaproteobacteria	L	ATPase involved in DNA repair	-	-	-	-	-	-	-	-	-	-	-	-	-
NODE_19950_length_4250_cov_7.855066_4	269797.Mbar_A2716	1.37e-05	58.5	COG0457@1|root,arCOG03038@2157|Archaea	2157|Archaea	KLT	Tetratricopeptide TPR_2 repeat protein	-	-	-	-	-	-	-	-	-	-	-	-	LRR_5,TPR_12,TPR_16,TPR_2,TPR_8,TPR_9,Transglut_core2
NODE_6716_length_6646_cov_7.972690_6	1121440.AUMA01000003_gene3114	3.98e-99	337	COG1148@1|root,COG1148@2|Bacteria,1QUMN@1224|Proteobacteria,43BMA@68525|delta/epsilon subdivisions,2X6ZG@28221|Deltaproteobacteria,2M898@213115|Desulfovibrionales	28221|Deltaproteobacteria	C	4Fe-4S ferredoxin iron-sulfur binding domain protein	-	-	1.8.7.3,1.8.98.4,1.8.98.5,1.8.98.6	ko:K03388	ko00680,ko01100,ko01120,ko01200,map00680,map01100,map01120,map01200	M00356,M00357,M00563,M00567	R04540,R11928,R11931,R11943,R11944	RC00011	ko00000,ko00001,ko00002,ko01000	-	-	-	Fer4,FlpD,Pyr_redox_2
NODE_484_length_24886_cov_14.928154_15	1047013.AQSP01000119_gene1321	0	1708	COG0587@1|root,COG0587@2|Bacteria,2NNVY@2323|unclassified Bacteria	2|Bacteria	L	DNA polymerase	dnaE	GO:0003674,GO:0003824,GO:0003887,GO:0005575,GO:0005622,GO:0005623,GO:0005737,GO:0005829,GO:0006139,GO:0006259,GO:0006260,GO:0006725,GO:0006807,GO:0008150,GO:0008152,GO:0009058,GO:0009059,GO:0009360,GO:0009987,GO:0016740,GO:0016772,GO:0016779,GO:0018130,GO:0019438,GO:0032991,GO:0034061,GO:0034641,GO:0034645,GO:0034654,GO:0042575,GO:0043170,GO:0044237,GO:0044238,GO:0044249,GO:0044260,GO:0044271,GO:…	2.7.7.7	ko:K02337	ko00230,ko00240,ko01100,ko03030,ko03430,ko03440,map00230,map00240,map01100,map03030,map03430,map03440	M00260	R00375,R00376,R00377,R00378	RC02795	ko00000,ko00001,ko00002,ko01000,ko03032,ko03400	-	-	-	DNA_pol3_alpha,HHH_6,PHP,RNase_T,tRNA_anti-codon
NODE_166_length_37446_cov_14.139205_14	1047013.AQSP01000109_gene2429	5.23e-266	790	COG1196@1|root,COG1196@2|Bacteria,2NNYZ@2323|unclassified Bacteria	2|Bacteria	D	Required for chromosome condensation and partitioning	smc	-	-	ko:K03529,ko:K10297	-	-	-	-	ko00000,ko03036,ko04121	-	-	-	SMC_N,SMC_hinge
NODE_16894_length_5117_cov_9.641841_1	472759.Nhal_3142	0	1353	COG1197@1|root,COG1197@2|Bacteria,1MUXG@1224|Proteobacteria,1RNCU@1236|Gammaproteobacteria,1WWJQ@135613|Chromatiales	135613|Chromatiales	L	Couples transcription and DNA repair by recognizing RNA polymerase (RNAP) stalled at DNA lesions. Mediates ATP-dependent release of RNAP and its truncated transcript from the DNA, and recruitment of nucleotide excision repair machinery to the damaged site	mfd	-	-	ko:K03723	ko03420,map03420	-	-	-	ko00000,ko00001,ko01000,ko03400	-	-	-	CarD_CdnL_TRCF,DEAD,Helicase_C,TRCF
NODE_17164_length_4541_cov_4.443156_2	1122176.KB903587_gene4512	1.08e-42	179	COG3209@1|root,COG3291@1|root,COG4935@1|root,COG3209@2|Bacteria,COG3291@2|Bacteria,COG4935@2|Bacteria,4NDZC@976|Bacteroidetes	976|Bacteroidetes	DZ	Pkd domain containing protein	-	-	-	-	-	-	-	-	-	-	-	-	CHU_C,SprB,TIG
NODE_6467_length_8081_cov_6.428732_2	880073.Calab_1205	3.58e-59	229	COG1361@1|root,COG2133@1|root,COG2374@1|root,COG3420@1|root,COG1361@2|Bacteria,COG2133@2|Bacteria,COG2374@2|Bacteria,COG3420@2|Bacteria,2NRB5@2323|unclassified Bacteria	2|Bacteria	G	Evidence 5 No homology to any previously reported sequences	xynX1	-	3.1.3.8,4.2.2.3	ko:K01083,ko:K01729,ko:K12287	ko00051,ko00562,map00051,map00562	-	R03371,R03706	RC00078	ko00000,ko00001,ko01000,ko02044	-	-	-	Beta_helix,Big_2,Exo_endo_phos,F5_F8_type_C,LTD,Laminin_G_3,SLH
NODE_14942_length_5442_cov_9.025617_2	886379.AEWI01000002_gene508	0	1012	COG0574@1|root,COG0574@2|Bacteria,4NGSQ@976|Bacteroidetes,2FM60@200643|Bacteroidia,3XJKN@558415|Marinilabiliaceae	976|Bacteroidetes	G	Pyruvate phosphate dikinase, PEP/pyruvate binding domain	-	-	-	-	-	-	-	-	-	-	-	-	PPDK_N
NODE_2000_length_13861_cov_9.107127_7	472759.Nhal_3142	0	1486	COG1197@1|root,COG1197@2|Bacteria,1MUXG@1224|Proteobacteria,1RNCU@1236|Gammaproteobacteria,1WWJQ@135613|Chromatiales	135613|Chromatiales	L	Couples transcription and DNA repair by recognizing RNA polymerase (RNAP) stalled at DNA lesions. Mediates ATP-dependent release of RNAP and its truncated transcript from the DNA, and recruitment of nucleotide excision repair machinery to the damaged site	mfd	-	-	ko:K03723	ko03420,map03420	-	-	-	ko00000,ko00001,ko01000,ko03400	-	-	-	CarD_CdnL_TRCF,DEAD,Helicase_C,TRCF
NODE_14764_length_4624_cov_13.415408_1	1121406.JAEX01000002_gene804	0	955	COG1148@1|root,COG2072@1|root,COG2199@1|root,COG1148@2|Bacteria,COG2072@2|Bacteria,COG3706@2|Bacteria,1QUM4@1224|Proteobacteria,42MPP@68525|delta/epsilon subdivisions,2WJ3U@28221|Deltaproteobacteria,2M7SC@213115|Desulfovibrionales	28221|Deltaproteobacteria	C	4Fe-4S ferredoxin iron-sulfur binding domain protein	-	-	1.8.7.3,1.8.98.4,1.8.98.5,1.8.98.6	ko:K03388	ko00680,ko01100,ko01120,ko01200,map00680,map01100,map01120,map01200	M00356,M00357,M00563,M00567	R04540,R11928,R11931,R11943,R11944	RC00011	ko00000,ko00001,ko00002,ko01000	-	-	-	FAD_binding_2,FAD_oxidored,Fer4,Fer4_7,NAD_binding_8,Pyr_redox_2,Response_reg
NODE_108_length_45157_cov_16.718305_36	1047013.AQSP01000142_gene203	0	1779	COG4447@1|root,COG4447@2|Bacteria	2|Bacteria	S	cellulose binding	-	-	-	-	-	-	-	-	-	-	-	-	Sortilin-Vps10
NODE_21373_length_4113_cov_7.524643_2	330214.NIDE2388	2.93e-26	125	29R89@1|root,30C9N@2|Bacteria	2|Bacteria	-	-	-	-	-	-	-	-	-	-	-	-	-	-	-
NODE_782_length_20430_cov_16.165399_4	997346.HMPREF9374_2695	2.1e-229	696	COG1197@1|root,COG1197@2|Bacteria,1TPF1@1239|Firmicutes,4H9NB@91061|Bacilli,27AZA@186824|Thermoactinomycetaceae	91061|Bacilli	L	TRCF	mfd	-	-	ko:K03723	ko03420,map03420	-	-	-	ko00000,ko00001,ko01000,ko03400	-	-	-	CarD_CdnL_TRCF,DEAD,Helicase_C,TRCF
NODE_192_length_34102_cov_6.027021_8	1313301.AUGC01000001_gene1456	9.75e-238	715	COG0747@1|root,COG4288@1|root,COG0747@2|Bacteria,COG4288@2|Bacteria,4NHM6@976|Bacteroidetes	976|Bacteroidetes	E	Lamin Tail Domain	-	-	-	-	-	-	-	-	-	-	-	-	Big_5,CHU_C,LTD
NODE_191_length_35200_cov_12.211296_4	1116472.MGMO_163c00010	0	1320	COG0587@1|root,COG0587@2|Bacteria,1MUIF@1224|Proteobacteria,1RP0K@1236|Gammaproteobacteria,1XEKH@135618|Methylococcales	135618|Methylococcales	L	Bacterial DNA polymerase III, alpha subunit	dnaE	-	2.7.7.7	ko:K02337	ko00230,ko00240,ko01100,ko03030,ko03430,ko03440,map00230,map00240,map01100,map03030,map03430,map03440	M00260	R00375,R00376,R00377,R00378	RC02795	ko00000,ko00001,ko00002,ko01000,ko03032,ko03400	-	-	-	DNA_pol3_alpha,HHH_6,PHP,tRNA_anti-codon
NODE_12999_length_5153_cov_7.023146_2	502025.Hoch_2529	0	1215	COG0841@1|root,COG0841@2|Bacteria,1MU48@1224|Proteobacteria,42MF6@68525|delta/epsilon subdivisions,2WJ8D@28221|Deltaproteobacteria,2YXGU@29|Myxococcales	28221|Deltaproteobacteria	V	Belongs to the resistance-nodulation-cell division (RND) (TC 2.A.6) family	-	-	-	ko:K03296	-	-	-	-	ko00000	2.A.6.2	-	-	ACR_tran
NODE_16422_length_5190_cov_15.044596_2	177437.HRM2_26180	2.83e-100	352	COG2114@1|root,COG3899@1|root,COG2114@2|Bacteria,COG3899@2|Bacteria,1MUDT@1224|Proteobacteria,42NXT@68525|delta/epsilon subdivisions,2WIZ3@28221|Deltaproteobacteria,2MKIU@213118|Desulfobacterales	28221|Deltaproteobacteria	T	Adenylyl- / guanylyl cyclase, catalytic domain	-	-	-	-	-	-	-	-	-	-	-	-	AAA_16,DZR,Guanylate_cyc,Pkinase,TPR_12
NODE_1315_length_16488_cov_13.121585_11	870187.Thini_1029	0	1199	COG1197@1|root,COG1197@2|Bacteria,1MUXG@1224|Proteobacteria,1RNCU@1236|Gammaproteobacteria,45ZNT@72273|Thiotrichales	72273|Thiotrichales	L	Couples transcription and DNA repair by recognizing RNA polymerase (RNAP) stalled at DNA lesions. Mediates ATP-dependent release of RNAP and its truncated transcript from the DNA, and recruitment of nucleotide excision repair machinery to the damaged site	mfd	-	-	ko:K03723	ko03420,map03420	-	-	-	ko00000,ko00001,ko01000,ko03400	-	-	-	CarD_CdnL_TRCF,DEAD,Helicase_C,TRCF
NODE_16786_length_4590_cov_7.366703_2	1168034.FH5T_10385	1.54e-218	665	COG1277@1|root,COG1277@2|Bacteria,4NI5T@976|Bacteroidetes,2FNVZ@200643|Bacteroidia	976|Bacteroidetes	E	ABC-type transport system involved in multi-copper enzyme maturation permease component	-	-	-	-	-	-	-	-	-	-	-	-	Peptidase_M1
NODE_9829_length_5611_cov_21.481102_2	177437.HRM2_p00230	3.54e-122	409	COG0784@1|root,COG3852@1|root,COG4564@1|root,COG0784@2|Bacteria,COG3852@2|Bacteria,COG4564@2|Bacteria,1NC9X@1224|Proteobacteria,43BKK@68525|delta/epsilon subdivisions,2X6YN@28221|Deltaproteobacteria	28221|Deltaproteobacteria	T	response regulator	-	-	-	-	-	-	-	-	-	-	-	-	HATPase_c,HisKA,PAS_9,Response_reg
NODE_88_length_26832_cov_6.231355_15	945713.IALB_0843	1.07e-98	342	COG4409@1|root,COG4409@2|Bacteria	2|Bacteria	G	exo-alpha-(2->6)-sialidase activity	-	-	-	-	-	-	-	-	-	-	-	-	CelD_N,Glyco_hydro_9,Laminin_G_3
NODE_1644_length_13702_cov_9.071518_5	1408473.JHXO01000001_gene2112	0	1637	COG0060@1|root,COG0060@2|Bacteria,4NEYT@976|Bacteroidetes,2FM5R@200643|Bacteroidia	976|Bacteroidetes	J	amino acids such as valine, to avoid such errors it has two additional distinct tRNA(Ile)-dependent editing activities. One activity is designated as 'pretransfer' editing and involves the hydrolysis of activated Val-AMP. The other activity is designated 'posttransfer' editing and involves deacylation of mischarged Val-tRNA(Ile)	ileS	GO:0003674,GO:0003824,GO:0004812,GO:0004822,GO:0005575,GO:0005622,GO:0005623,GO:0005737,GO:0006082,GO:0006139,GO:0006399,GO:0006412,GO:0006418,GO:0006428,GO:0006518,GO:0006520,GO:0006725,GO:0006807,GO:0008150,GO:0008152,GO:0009058,GO:0009059,GO:0009987,GO:0010467,GO:0016070,GO:0016874,GO:0016875,GO:0019538,GO:0019752,GO:0034641,GO:0034645,GO:0034660,GO:0043038,GO:0043039,GO:0043043,GO:0043170,GO:…	6.1.1.5	ko:K01870	ko00970,map00970	M00359,M00360	R03656	RC00055,RC00523	ko00000,ko00001,ko00002,ko01000,ko01007,ko03016	-	-	-	Anticodon_1,tRNA-synt_1
NODE_5226_length_7887_cov_13.626788_2	1408473.JHXO01000013_gene561	7.13e-157	505	COG0642@1|root,COG3292@1|root,COG2205@2|Bacteria,COG3292@2|Bacteria,4NDXU@976|Bacteroidetes,2FX61@200643|Bacteroidia	976|Bacteroidetes	T	His Kinase A (phosphoacceptor) domain	-	-	-	-	-	-	-	-	-	-	-	-	HATPase_c,HTH_18,HisKA,Reg_prop,Response_reg,Y_Y_Y
NODE_318_length_27351_cov_7.107598_30	362976.HQ_3461A	4.97e-205	658	COG1372@1|root,COG1933@1|root,arCOG03145@2157|Archaea,arCOG03147@2157|Archaea,arCOG04447@2157|Archaea,2XU5S@28890|Euryarchaeota,23SG3@183963|Halobacteria	183963|Halobacteria	L	Possesses two activities a DNA synthesis (polymerase) and an exonucleolytic activity that degrades single-stranded DNA in the 3'- to 5'-direction. Has a template-primer preference which is characteristic of a replicative DNA polymerase	polC	-	2.7.7.7	ko:K02322	ko00230,ko00240,ko01100,ko03030,map00230,map00240,map01100,map03030	M00264	R00375,R00376,R00377,R00378	RC02795	ko00000,ko00001,ko00002,ko01000,ko03032	-	-	-	Intein_splicing,LAGLIDADG_3,PolC_DP2
NODE_1317_length_14076_cov_11.319235_9	981383.AEWH01000020_gene2451	6.82e-208	639	COG1197@1|root,COG1197@2|Bacteria,1TPF1@1239|Firmicutes,4H9NB@91061|Bacilli	91061|Bacilli	L	Couples transcription and DNA repair by recognizing RNA polymerase (RNAP) stalled at DNA lesions. Mediates ATP-dependent release of RNAP and its truncated transcript from the DNA, and recruitment of nucleotide excision repair machinery to the damaged site	mfd	-	-	ko:K03723	ko03420,map03420	-	-	-	ko00000,ko00001,ko01000,ko03400	-	-	-	CarD_CdnL_TRCF,DEAD,Helicase_C,TRCF
NODE_11477_length_6177_cov_12.168736_2	292563.Cyast_1024	2.69e-78	285	COG0004@1|root,COG0642@1|root,COG0745@1|root,COG0004@2|Bacteria,COG0745@2|Bacteria,COG2205@2|Bacteria	2|Bacteria	T	PhoQ Sensor	-	-	-	ko:K03320	-	-	-	-	ko00000,ko02000	1.A.11	-	-	Ammonium_transp,EAL,GGDEF,HATPase_c,HisKA,Hpt,PAS_9,Response_reg
[truncated: 68,785 more rows]
